# Supplementary material
Source: publisher figshare collection journal article supplement (https://gsajournals.figshare.com/ndownloader/files/23204447)
Supplement: Supplementary file 1 [file 23204447]

Figure S4: Pairwise phenotypic Euclidian distances plotted against pairwise Euclidian genetic distances for all available traits. Genetic Euclidian distances were calculated based on the 100 most significantly associated SNP markers to the trait as given by the GWAS.

Pairwise phenotypic Euclidian distances plotted against pairwise Euclidian genetic distances for all available traits (one page for each trait). Genetic Euclidian distances were calculated based on the 100 most significantly associated SNP markers to the trait as given by the GWAS (Genome-Wide-Association-Study). A full description of the traits is available in File S1.

ADF\_04\_me17

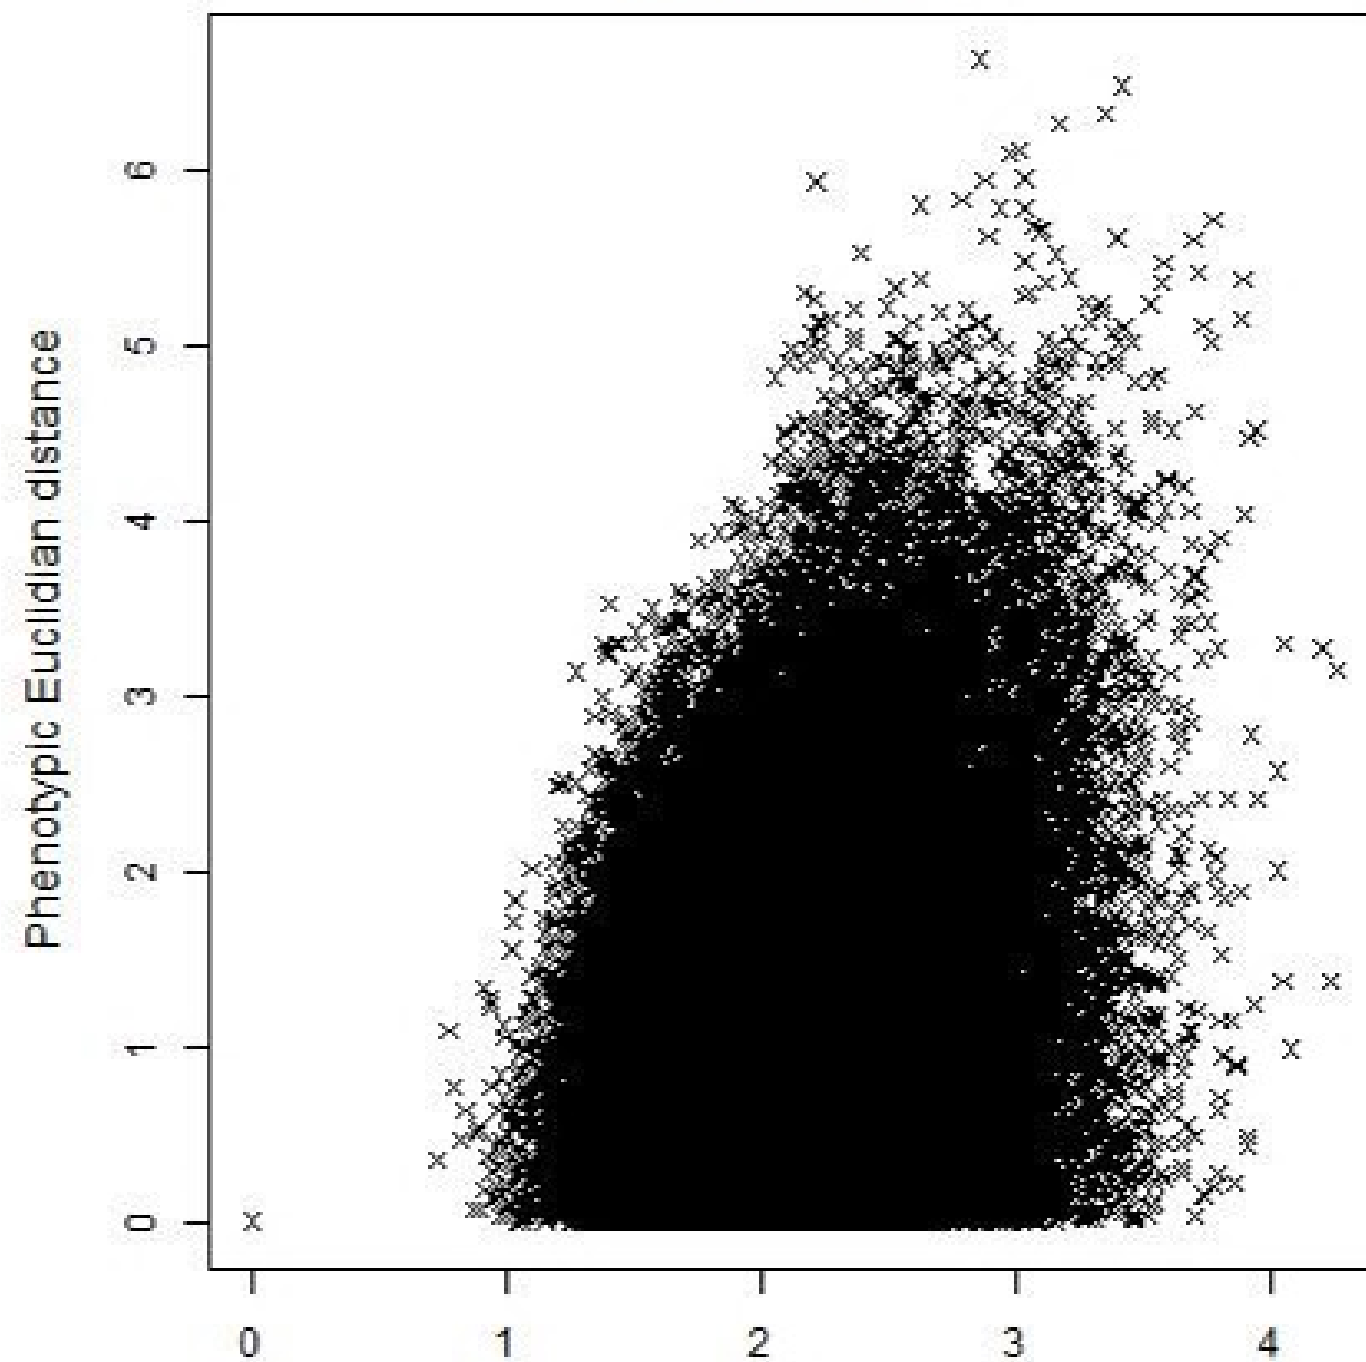

Genetic Euclidian distance (based on the 100 most significantly associated SNPs)

ADF\_10\_me17

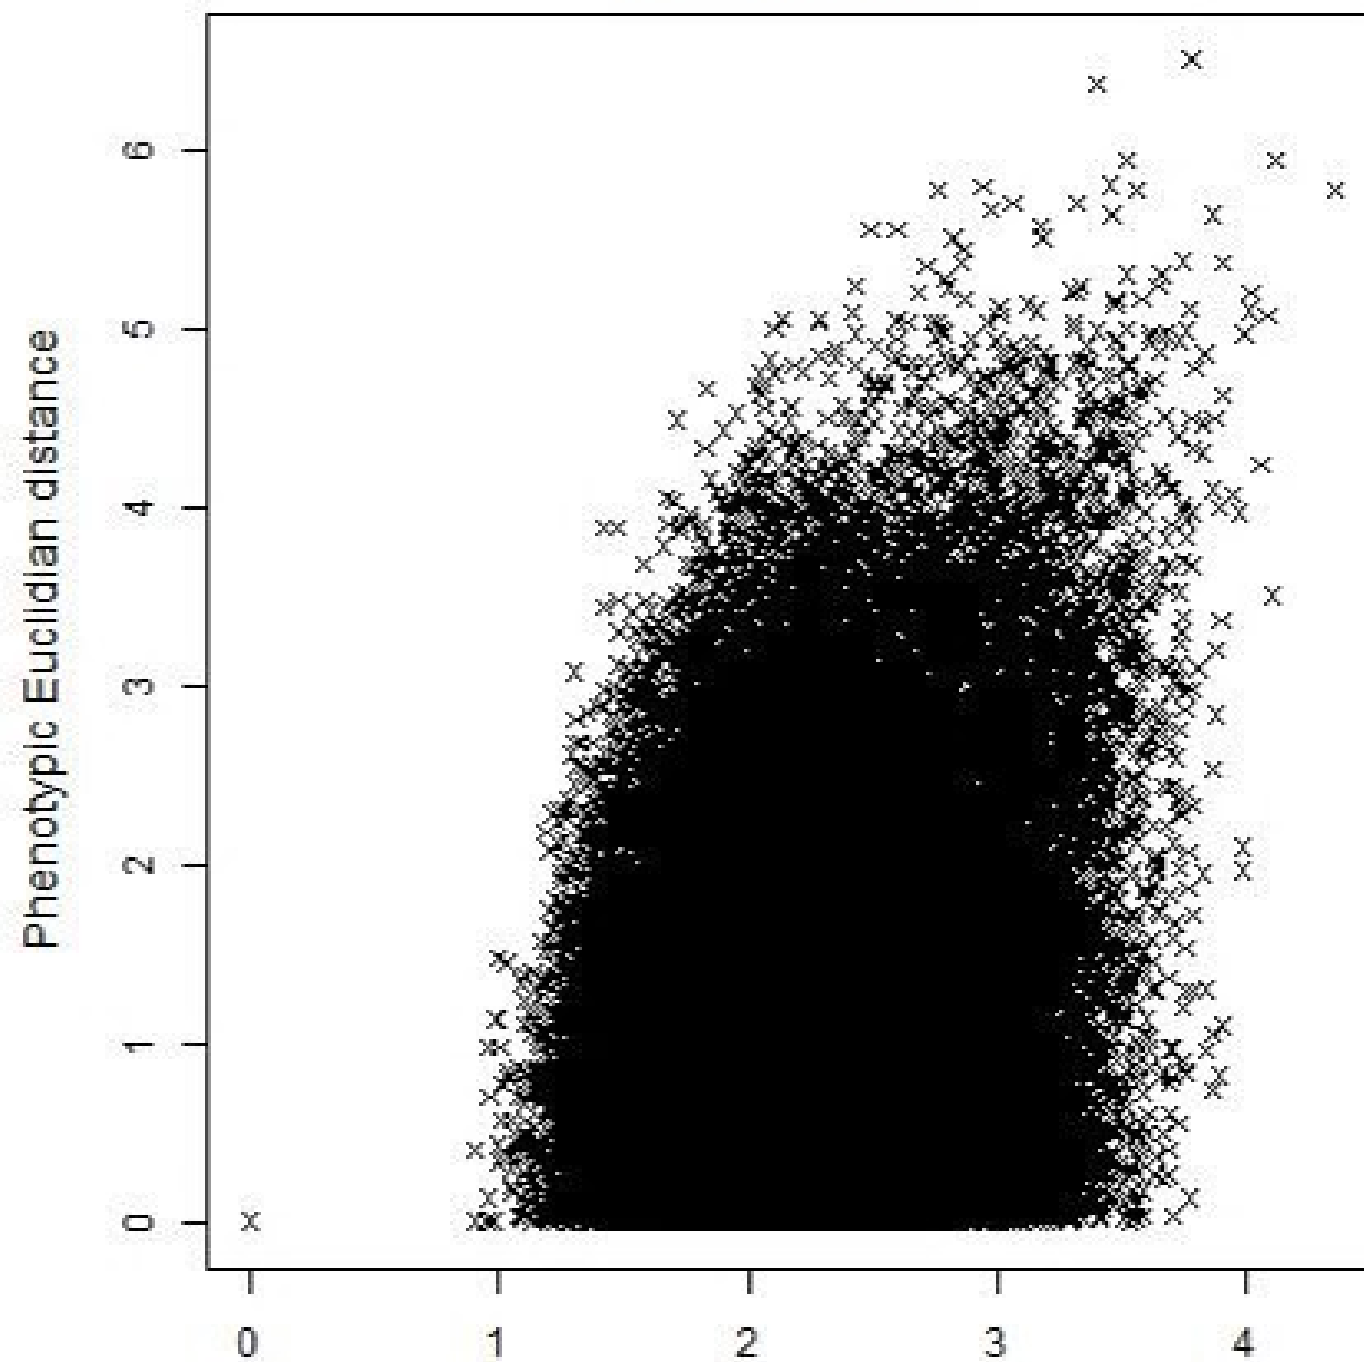

Genetic Euclidian distance (based on the 100 most significantly associated SNPs)

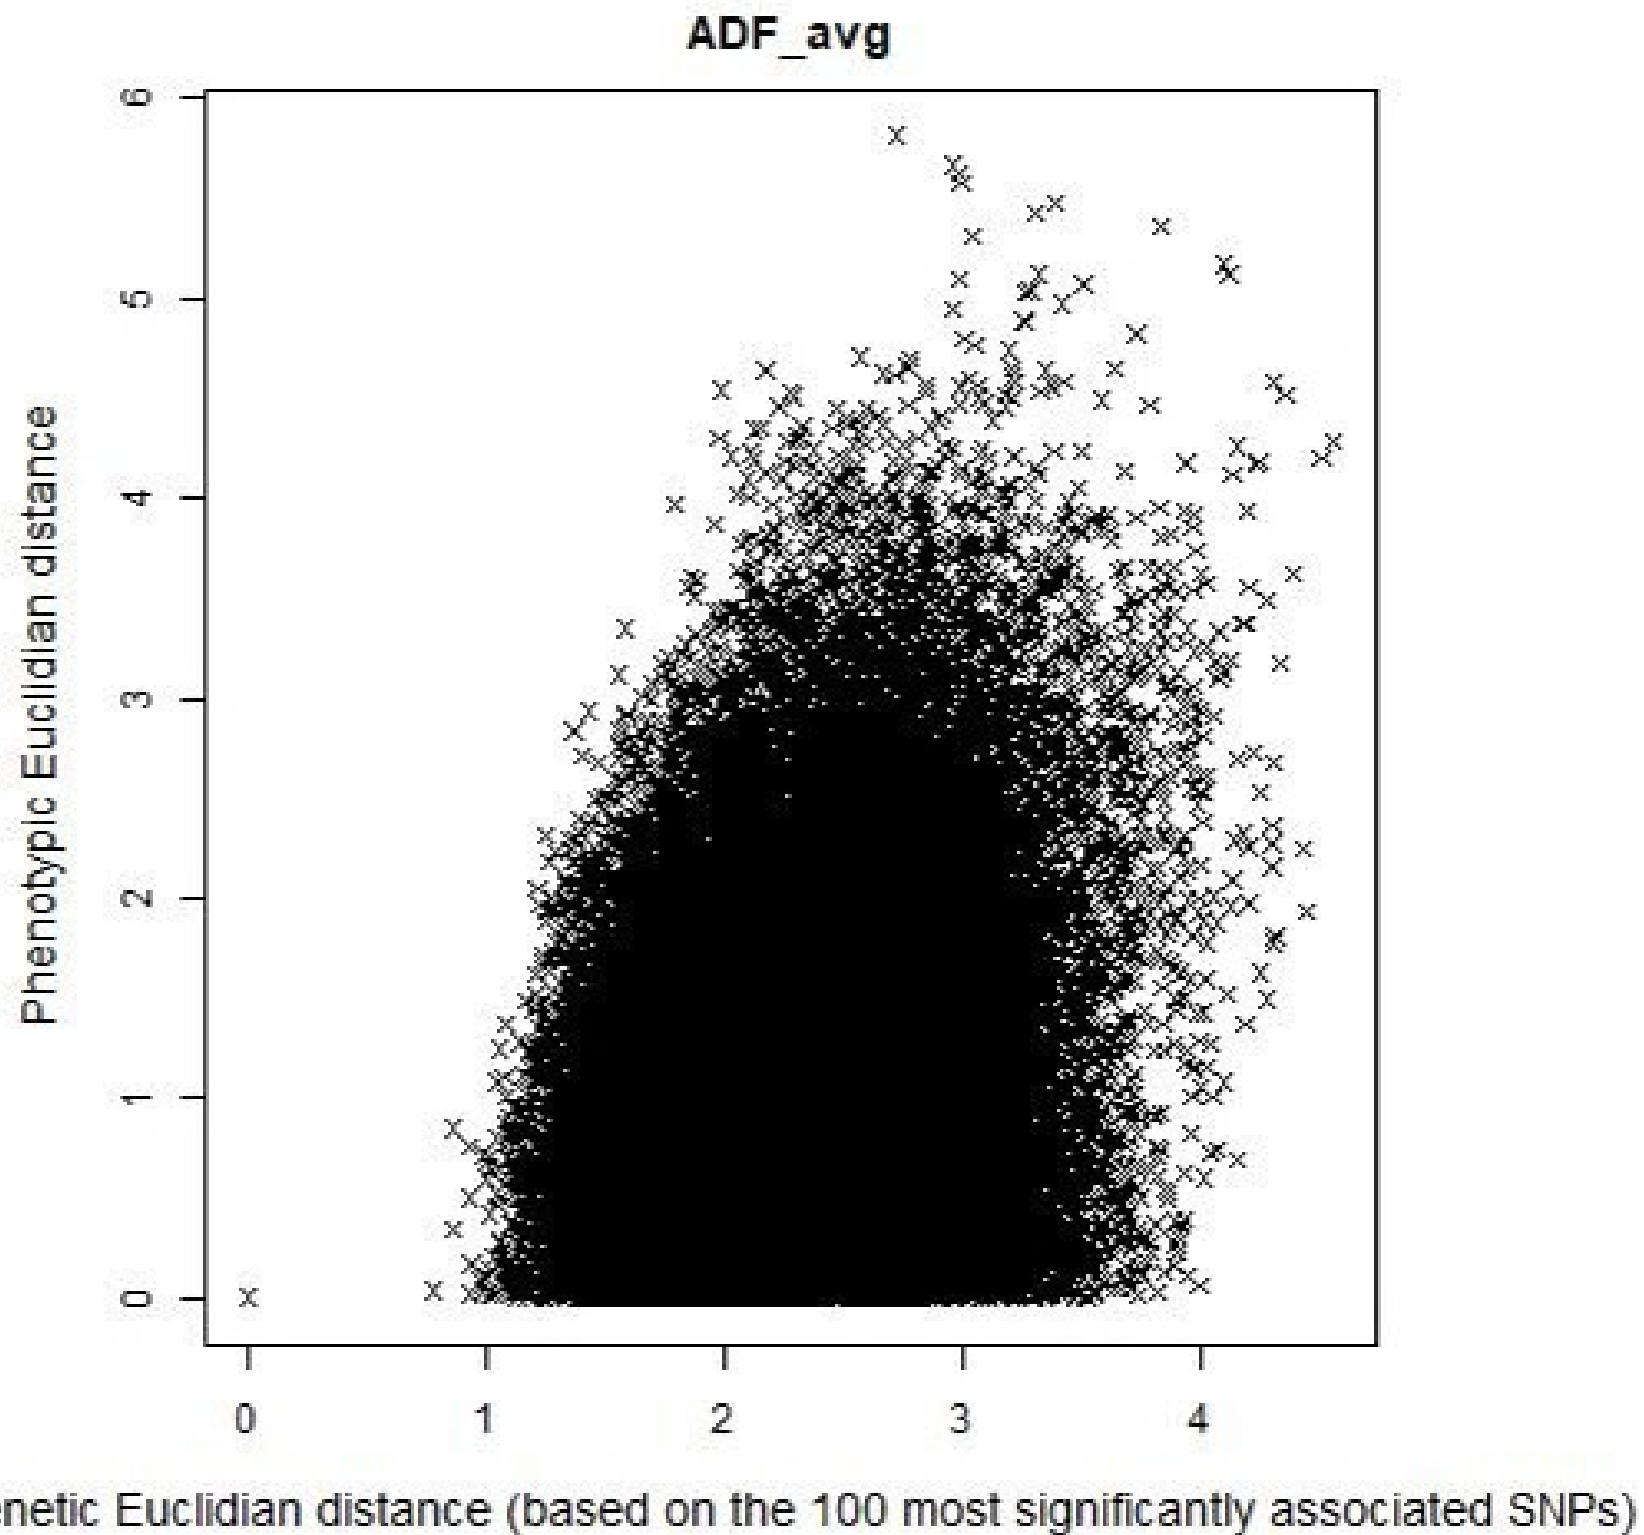

ADL\_04\_me17

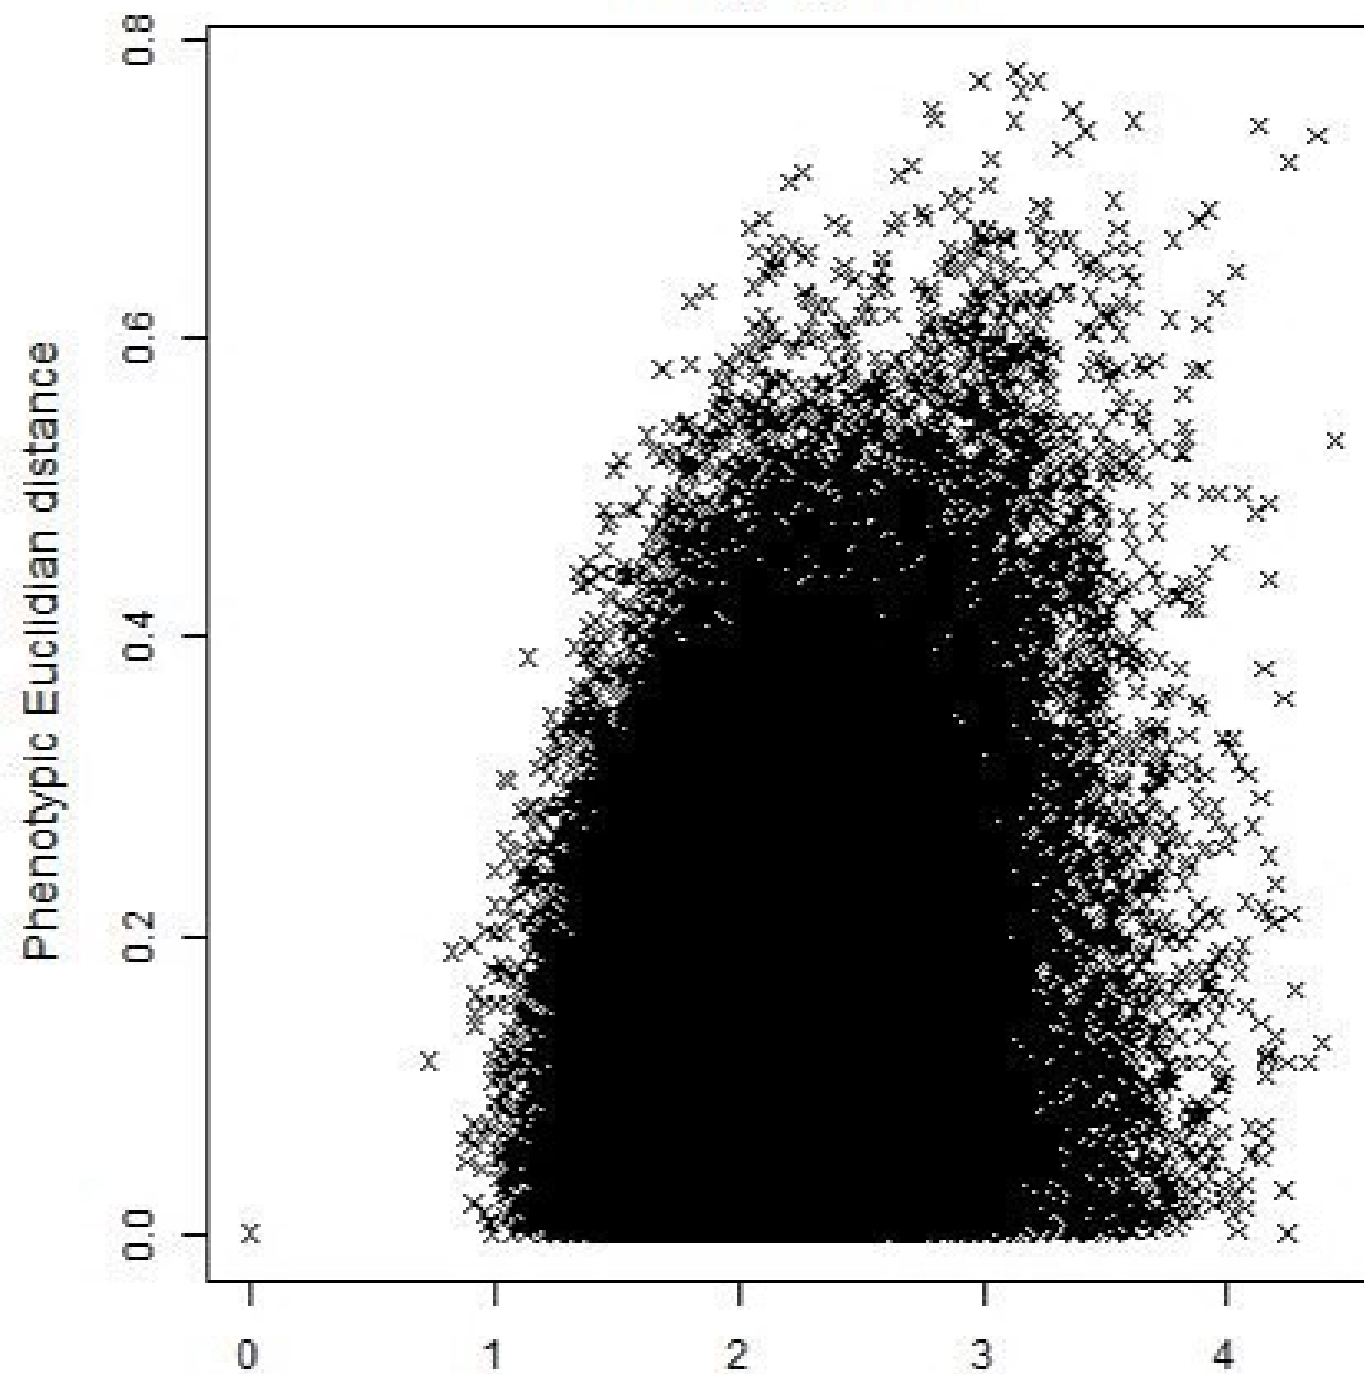

Genetic Euclidian distance (based on the 100 most significantly associated SNPs)

ADL\_10\_me17

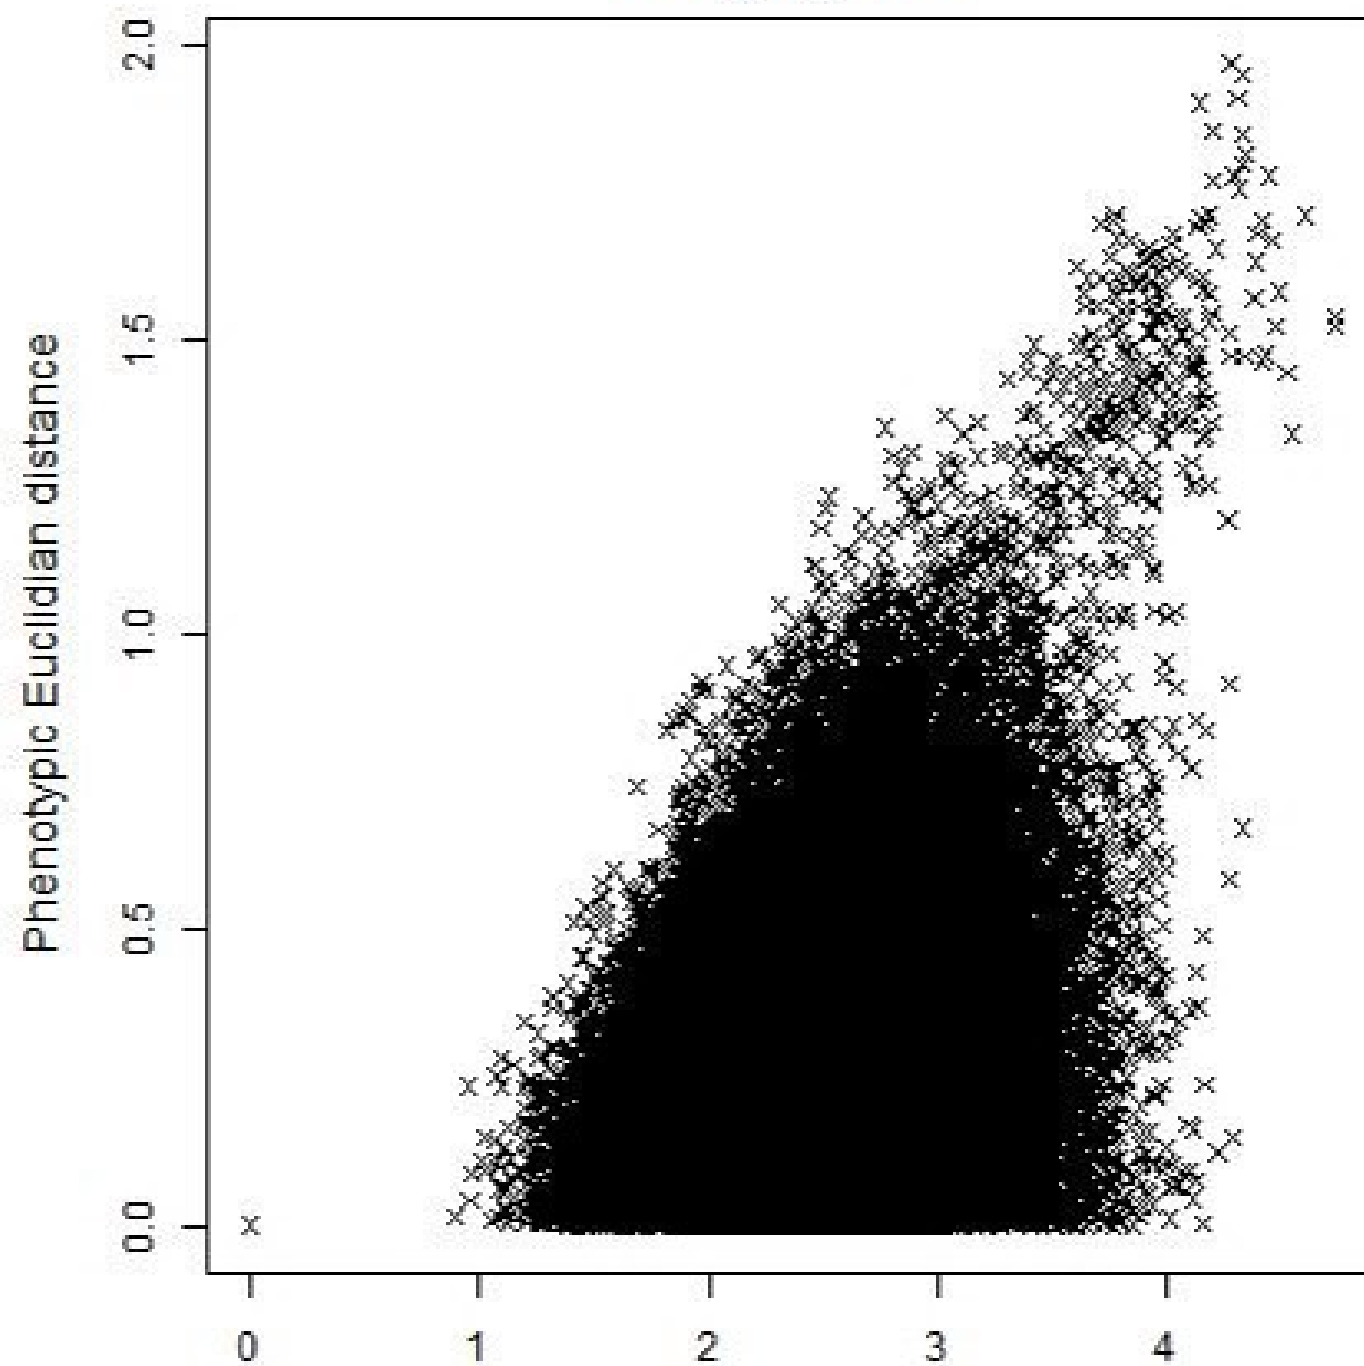

Genetic Euclidian distance (based on the 100 most significantly associated SNPs)

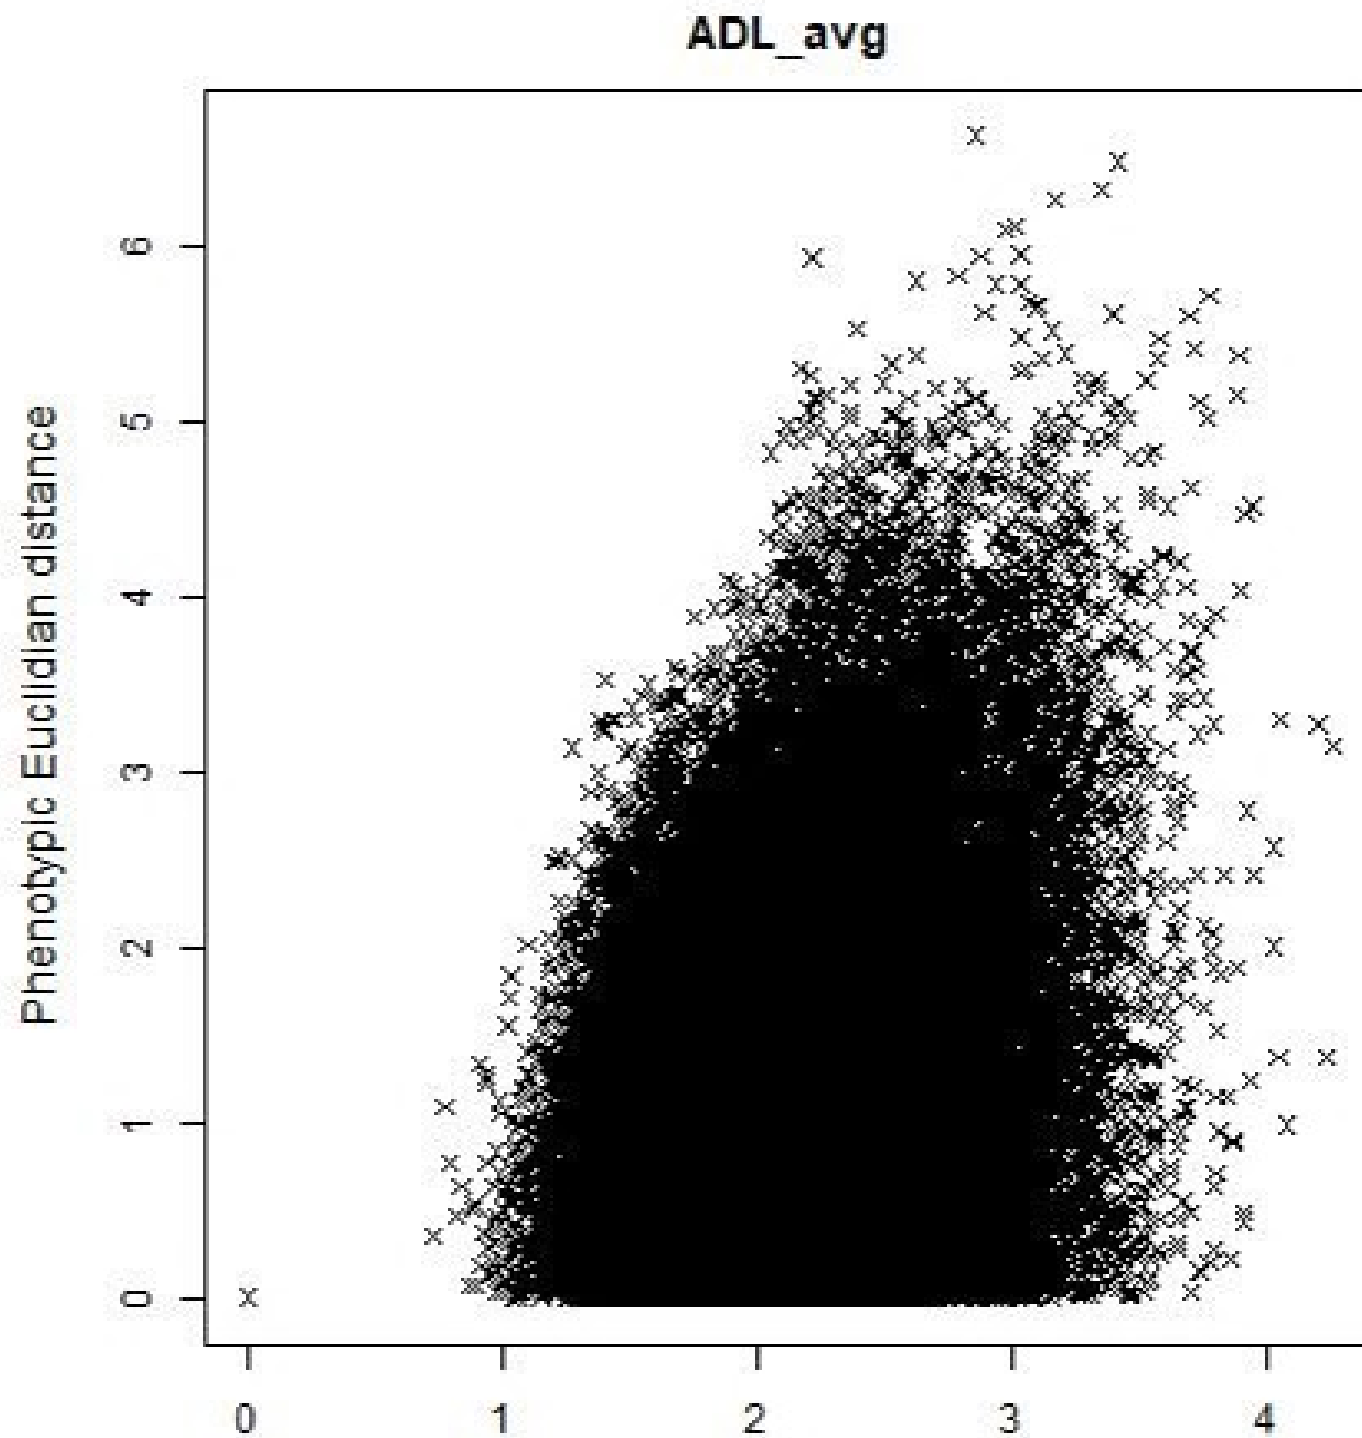

Genetic Euclidian distance (based on the 100 most significantly associated SNPs)

# AGR\_me17

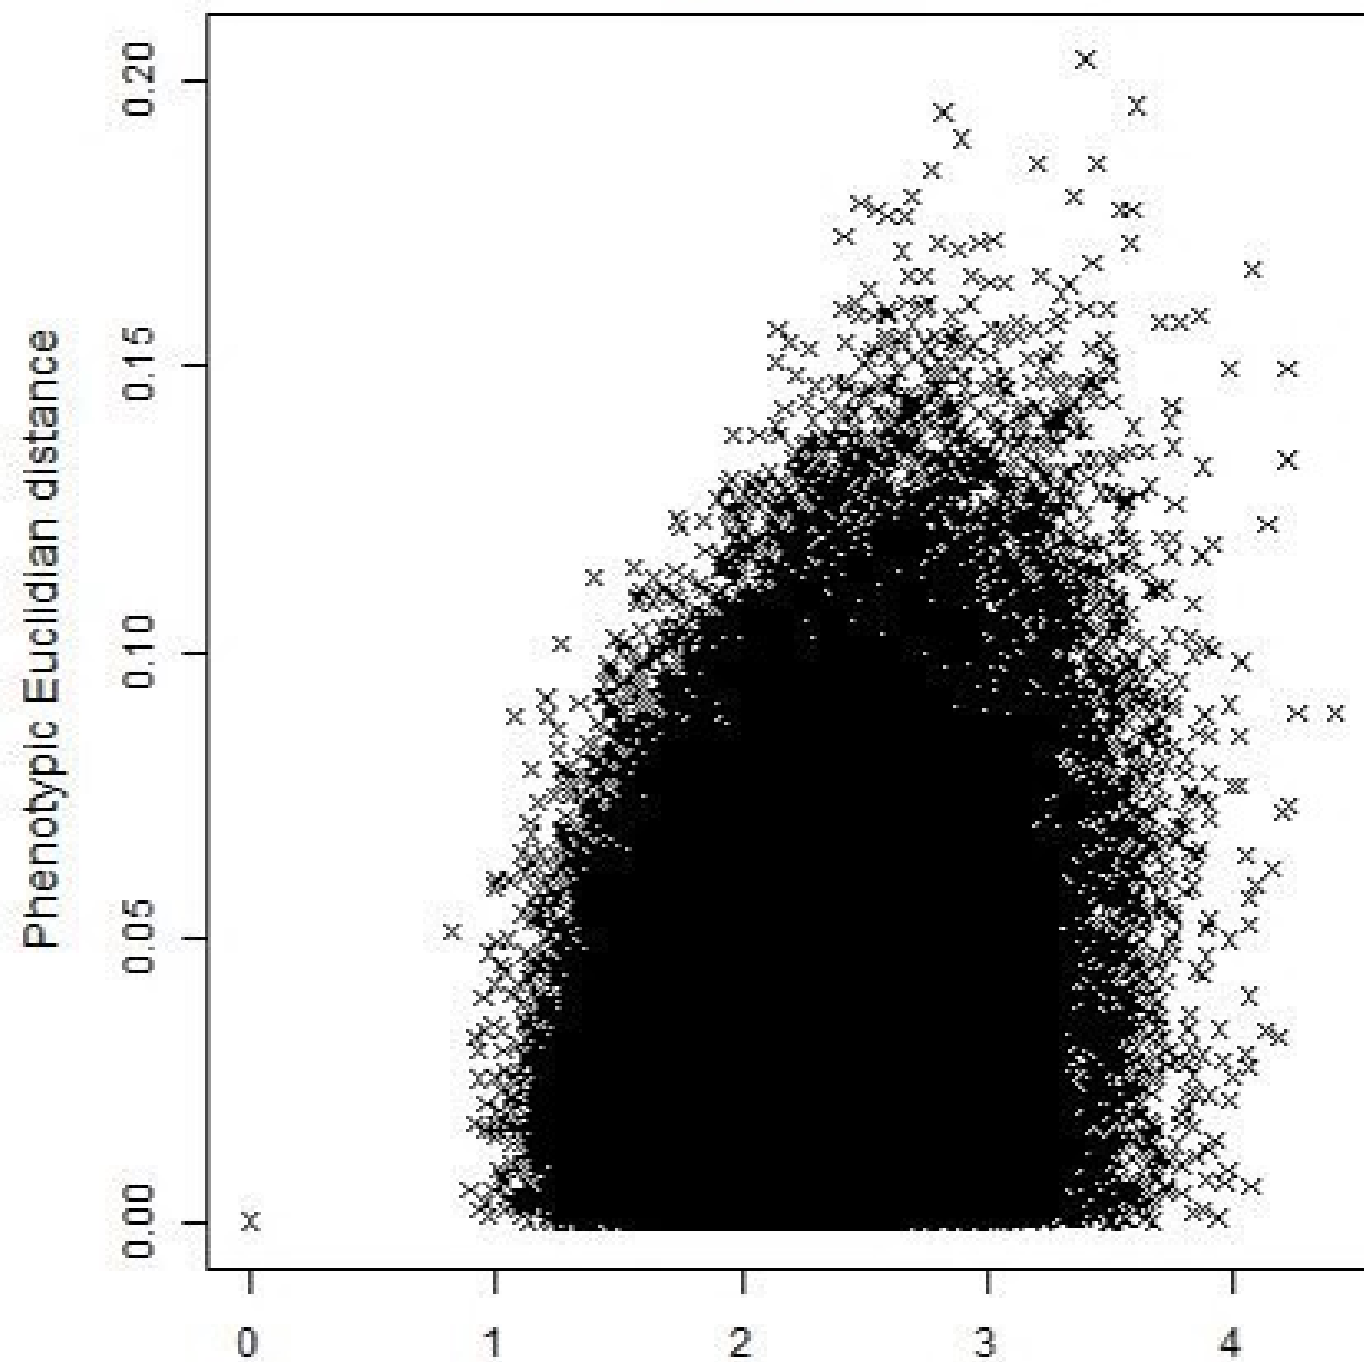

Genetic Euclidian distance (based on the 100 most significantly associated SNPs)



# AGR\_po17

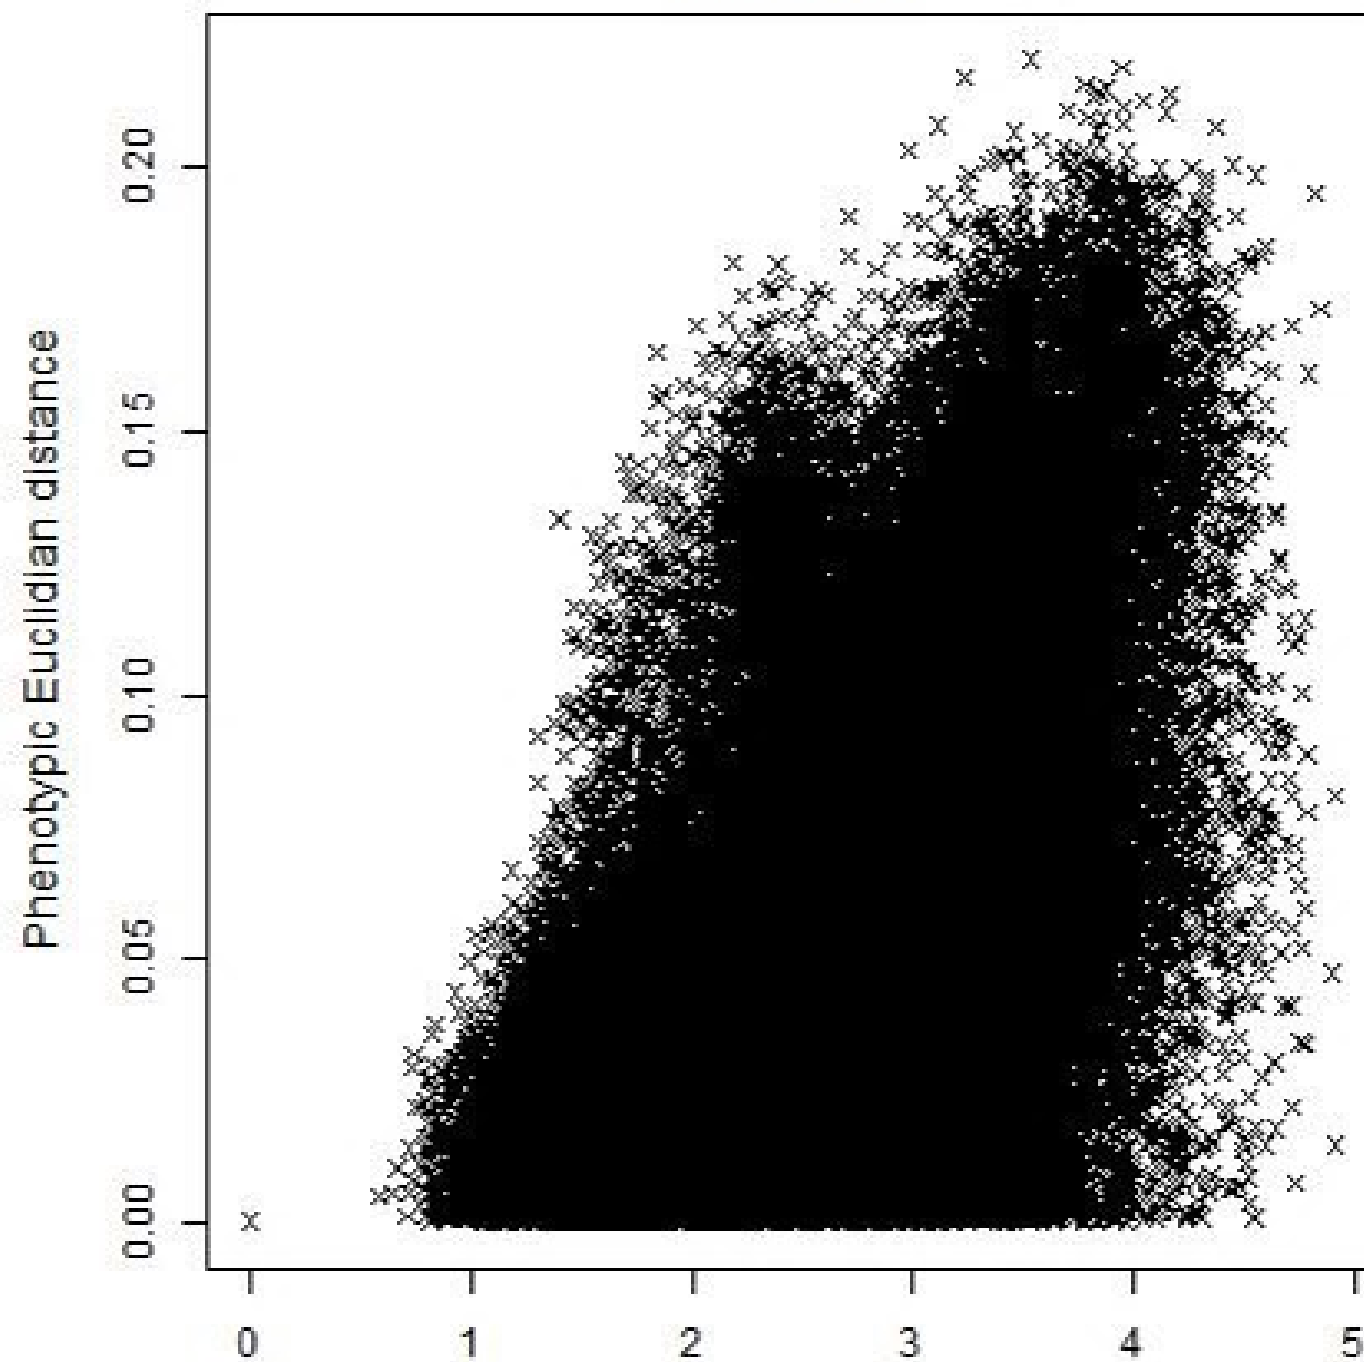

Genetic Euclidian distance (based on the 100 most significantly associated SNPs)

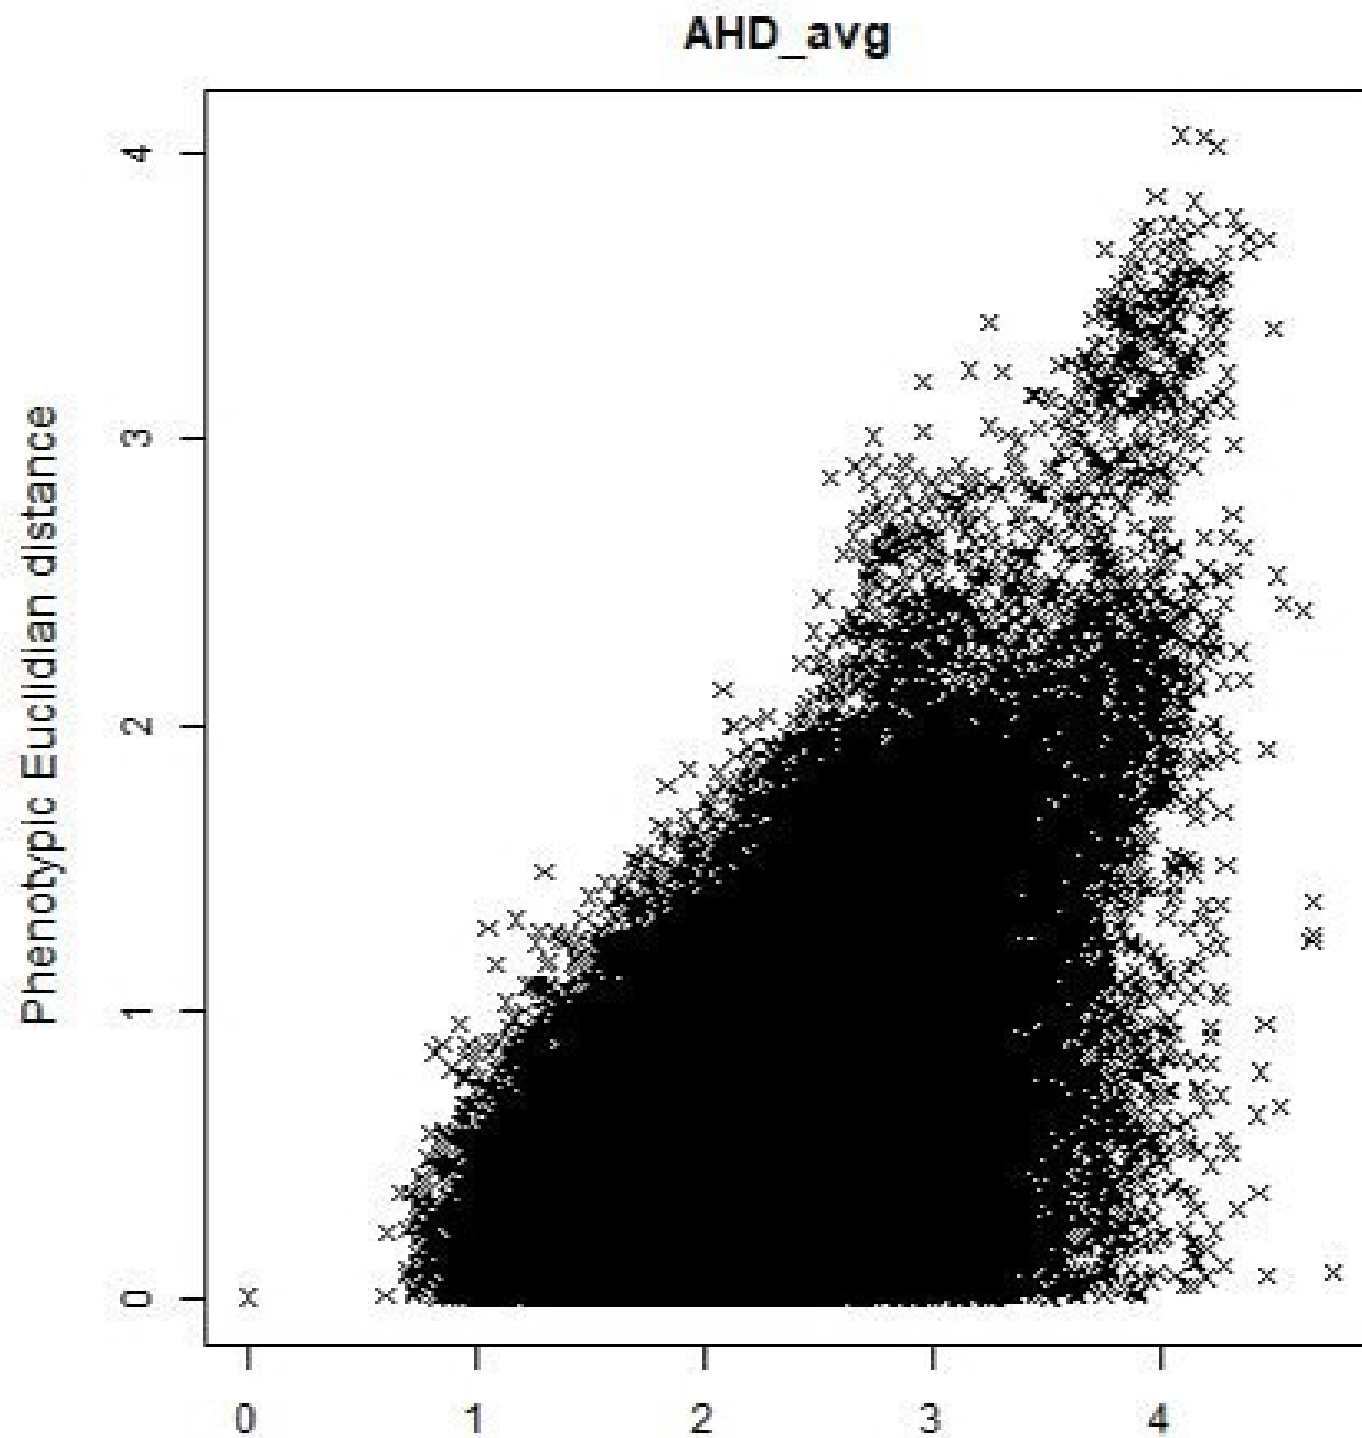

Genetic Euclidian distance (based on the 100 most significantly associated SNPs)

# AHD\_lu16

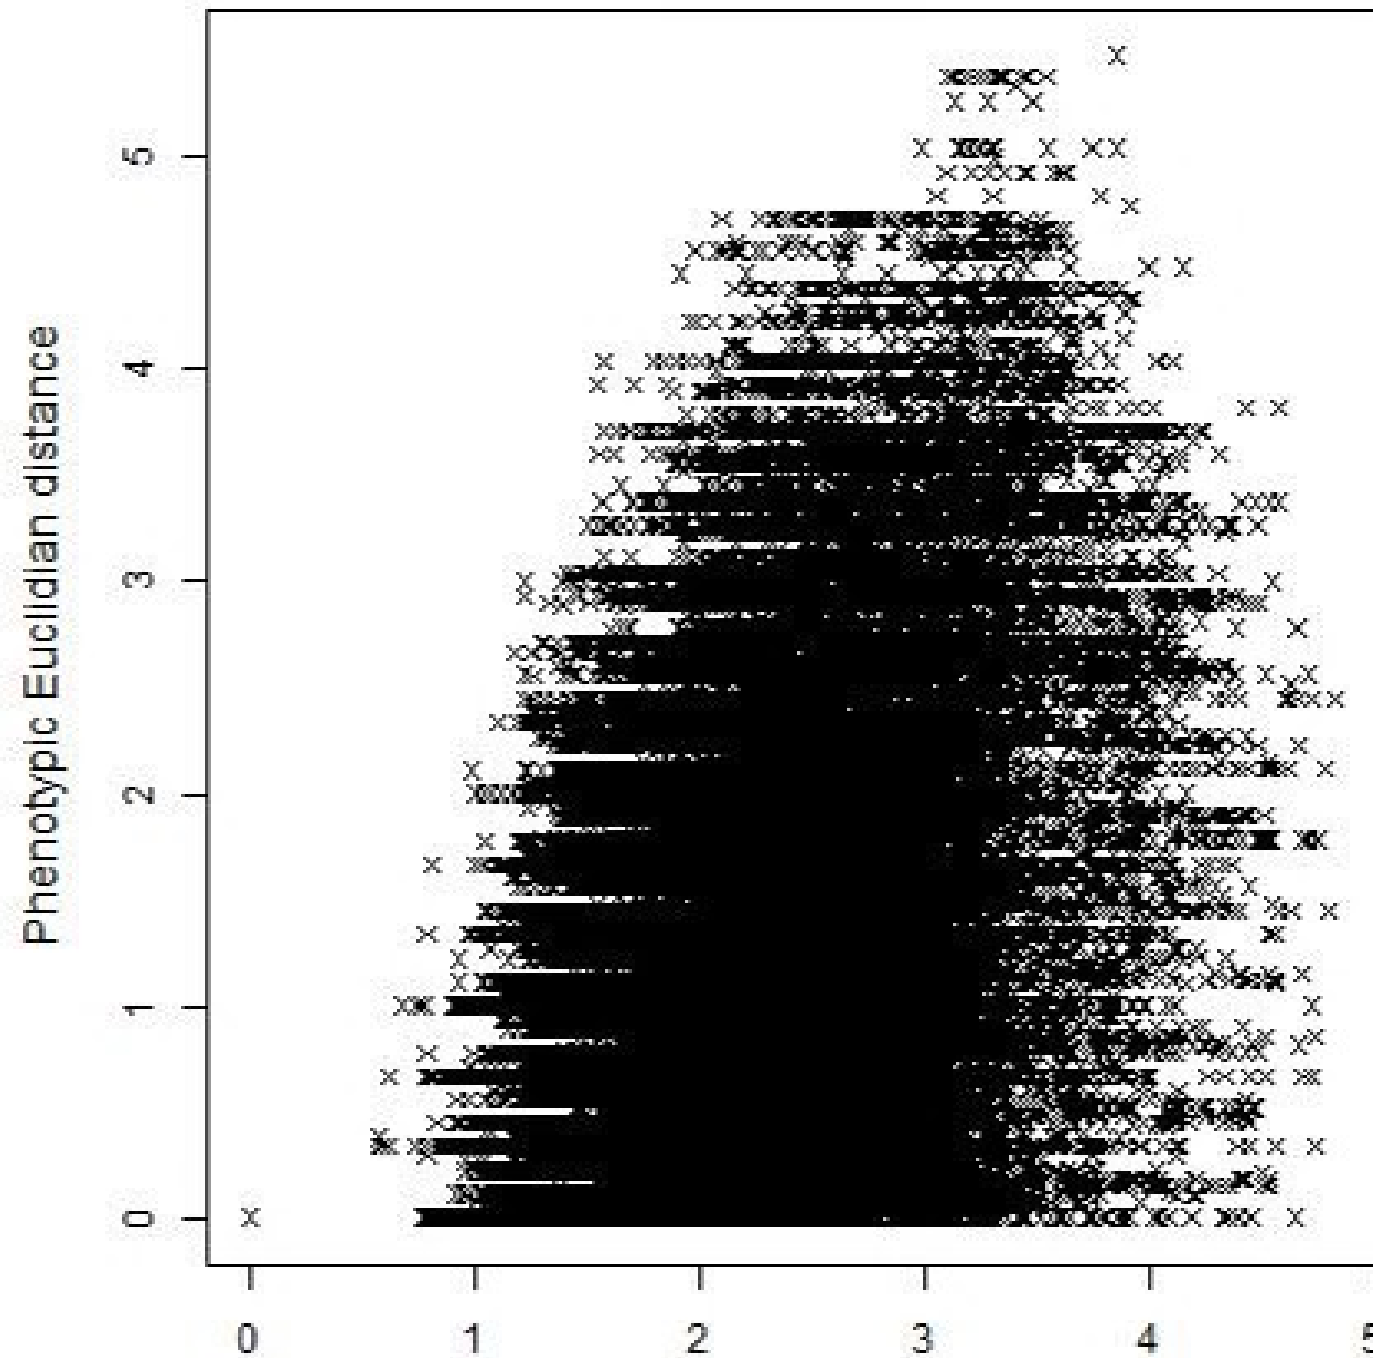

Genetic Euclidian distance (based on the 100 most significantly associated SNPs)

# AHD\_lu17

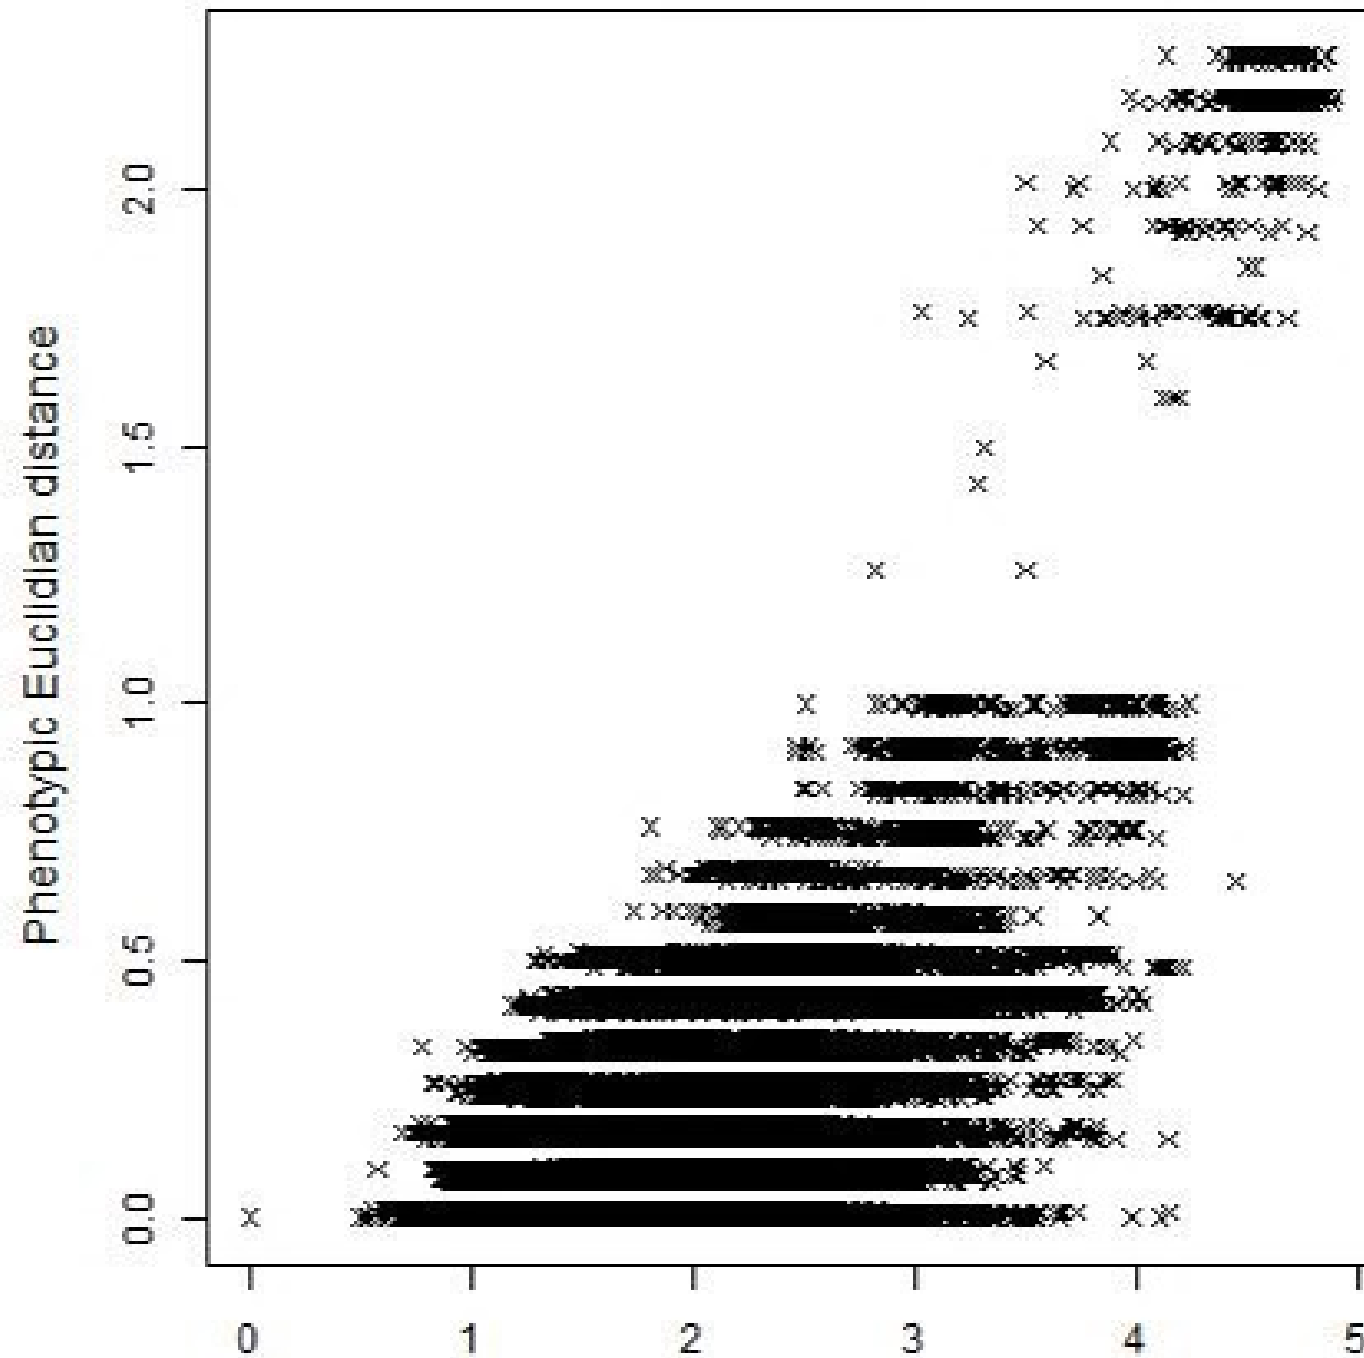

Genetic Euclidian distance (based on the 100 most significantly associated SNPs)

# AHD\_me16

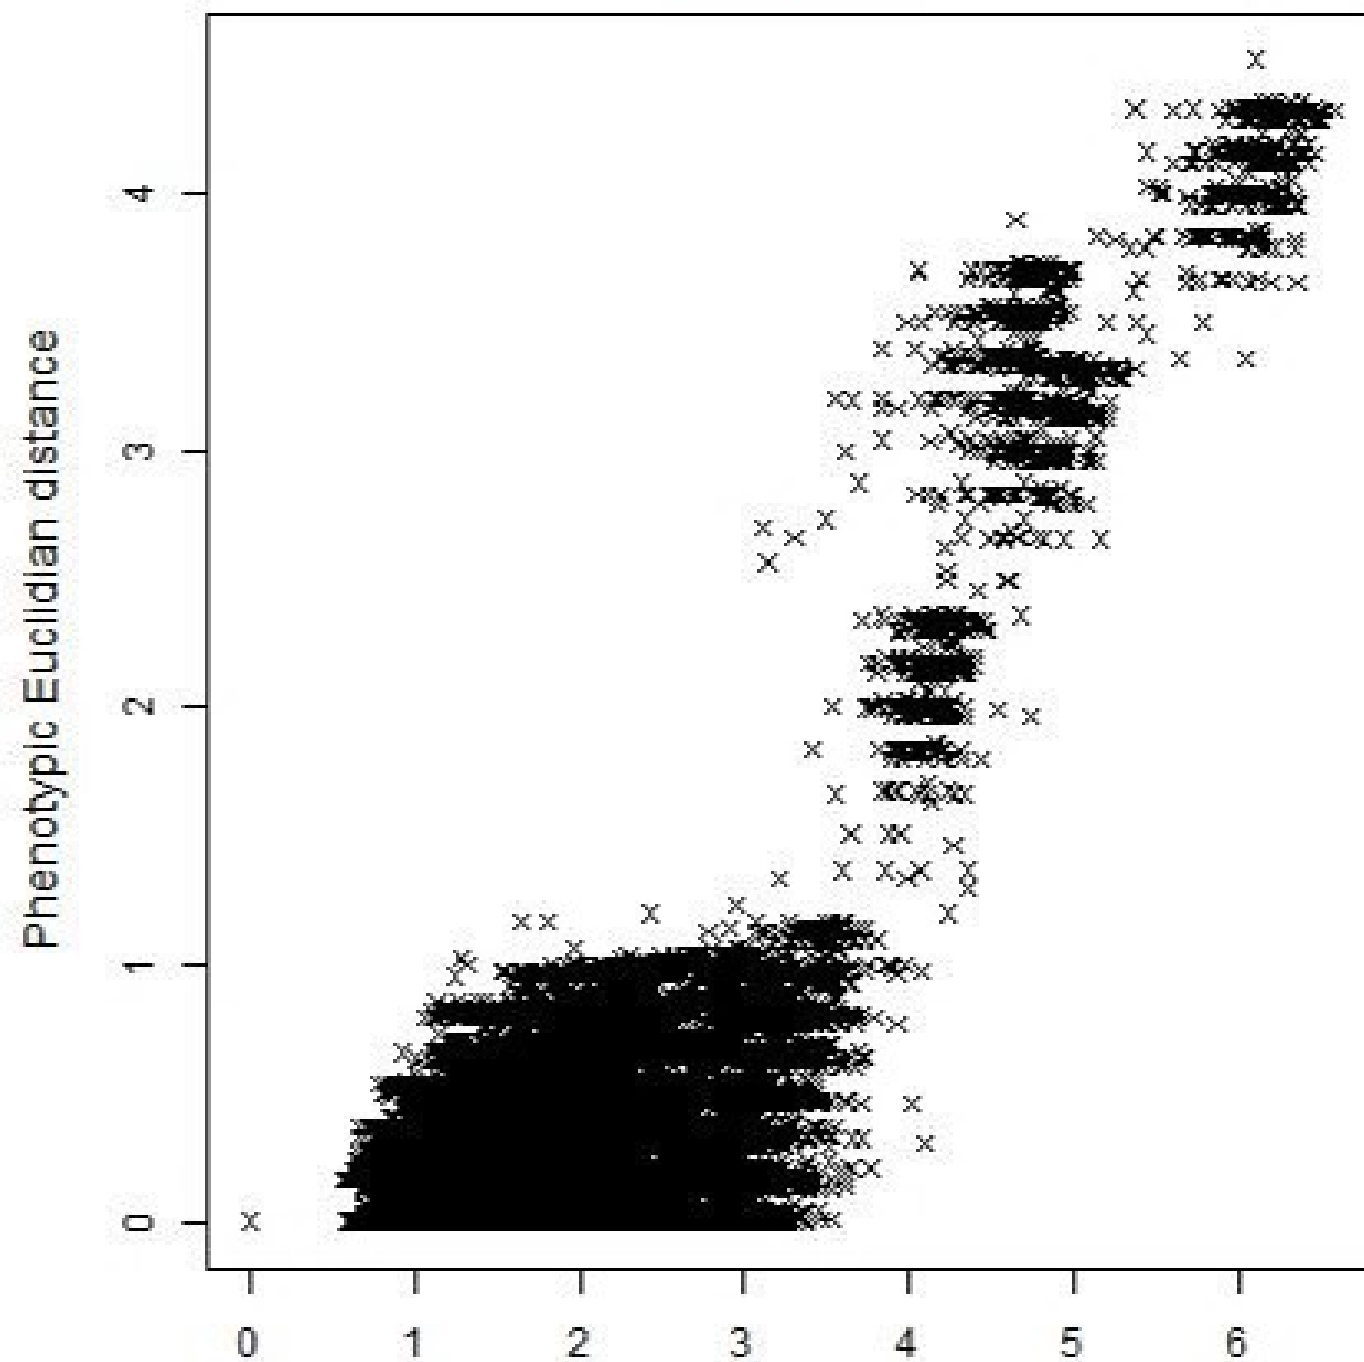

Genetic Euclidian distance (based on the 100 most significantly associated SNPs)

# AHD\_me17

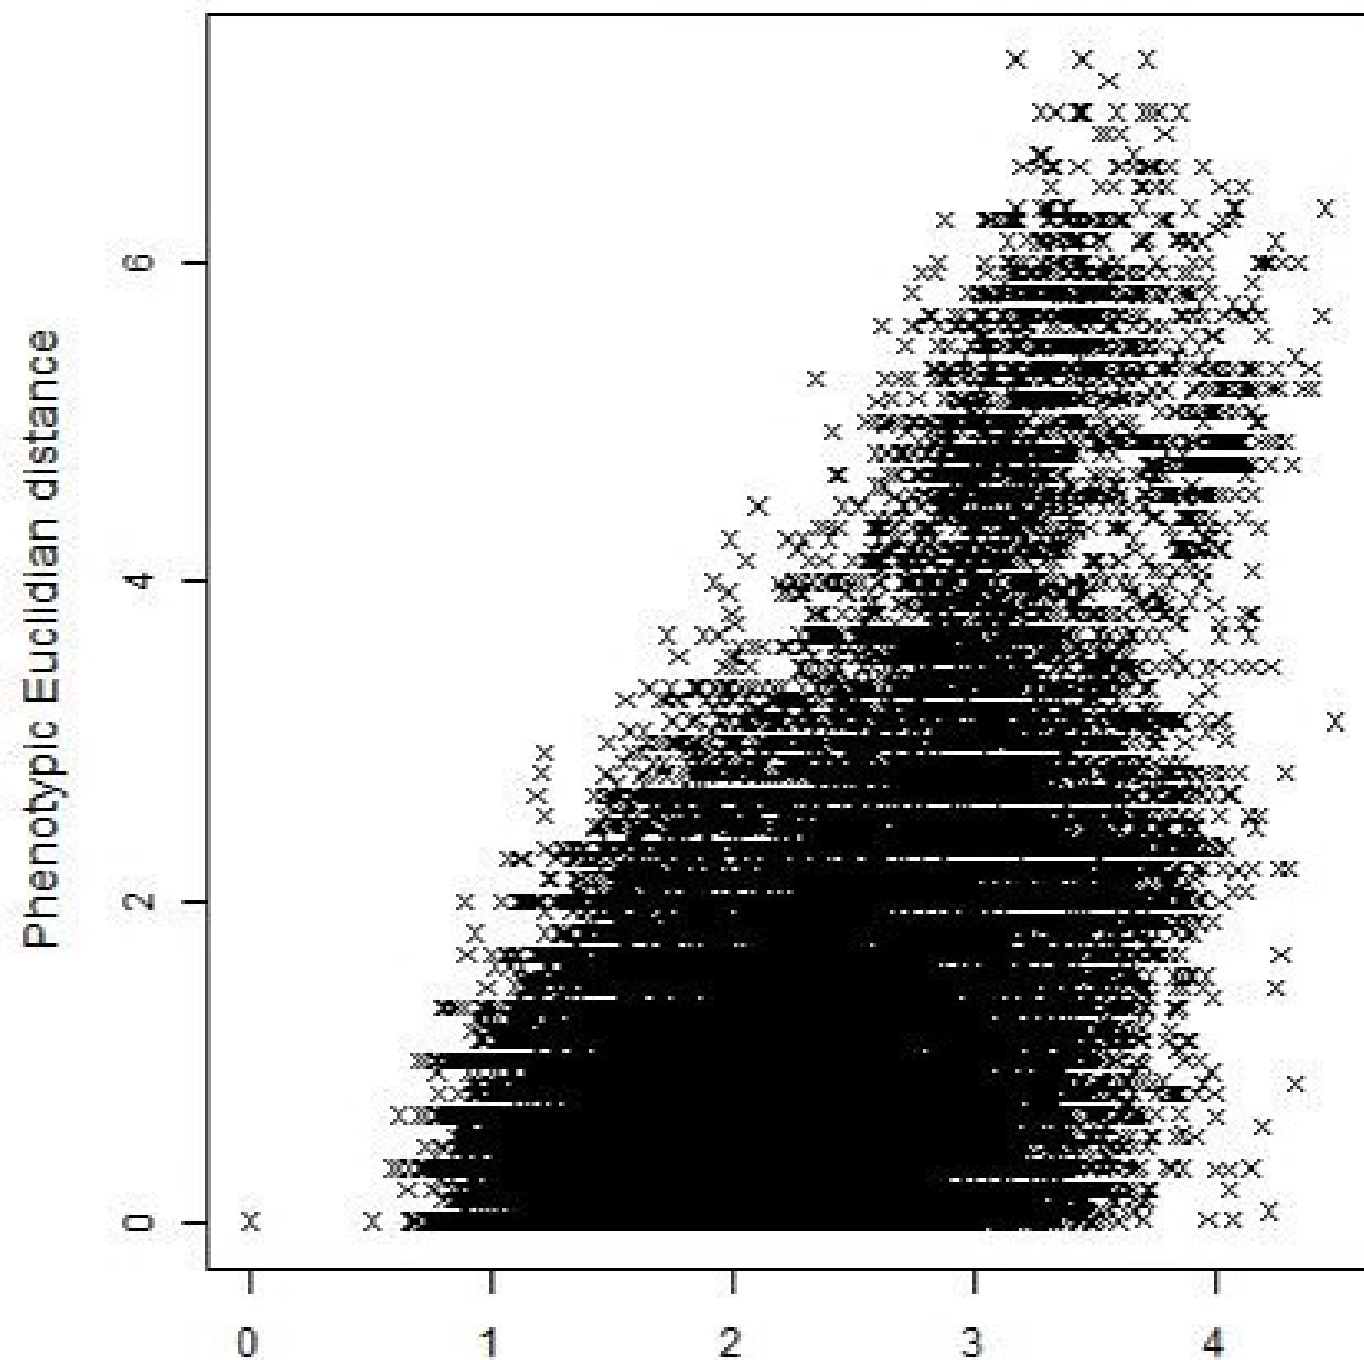

Genetic Euclidian distance (based on the 100 most significantly associated SNPs)

# AHD\_po16

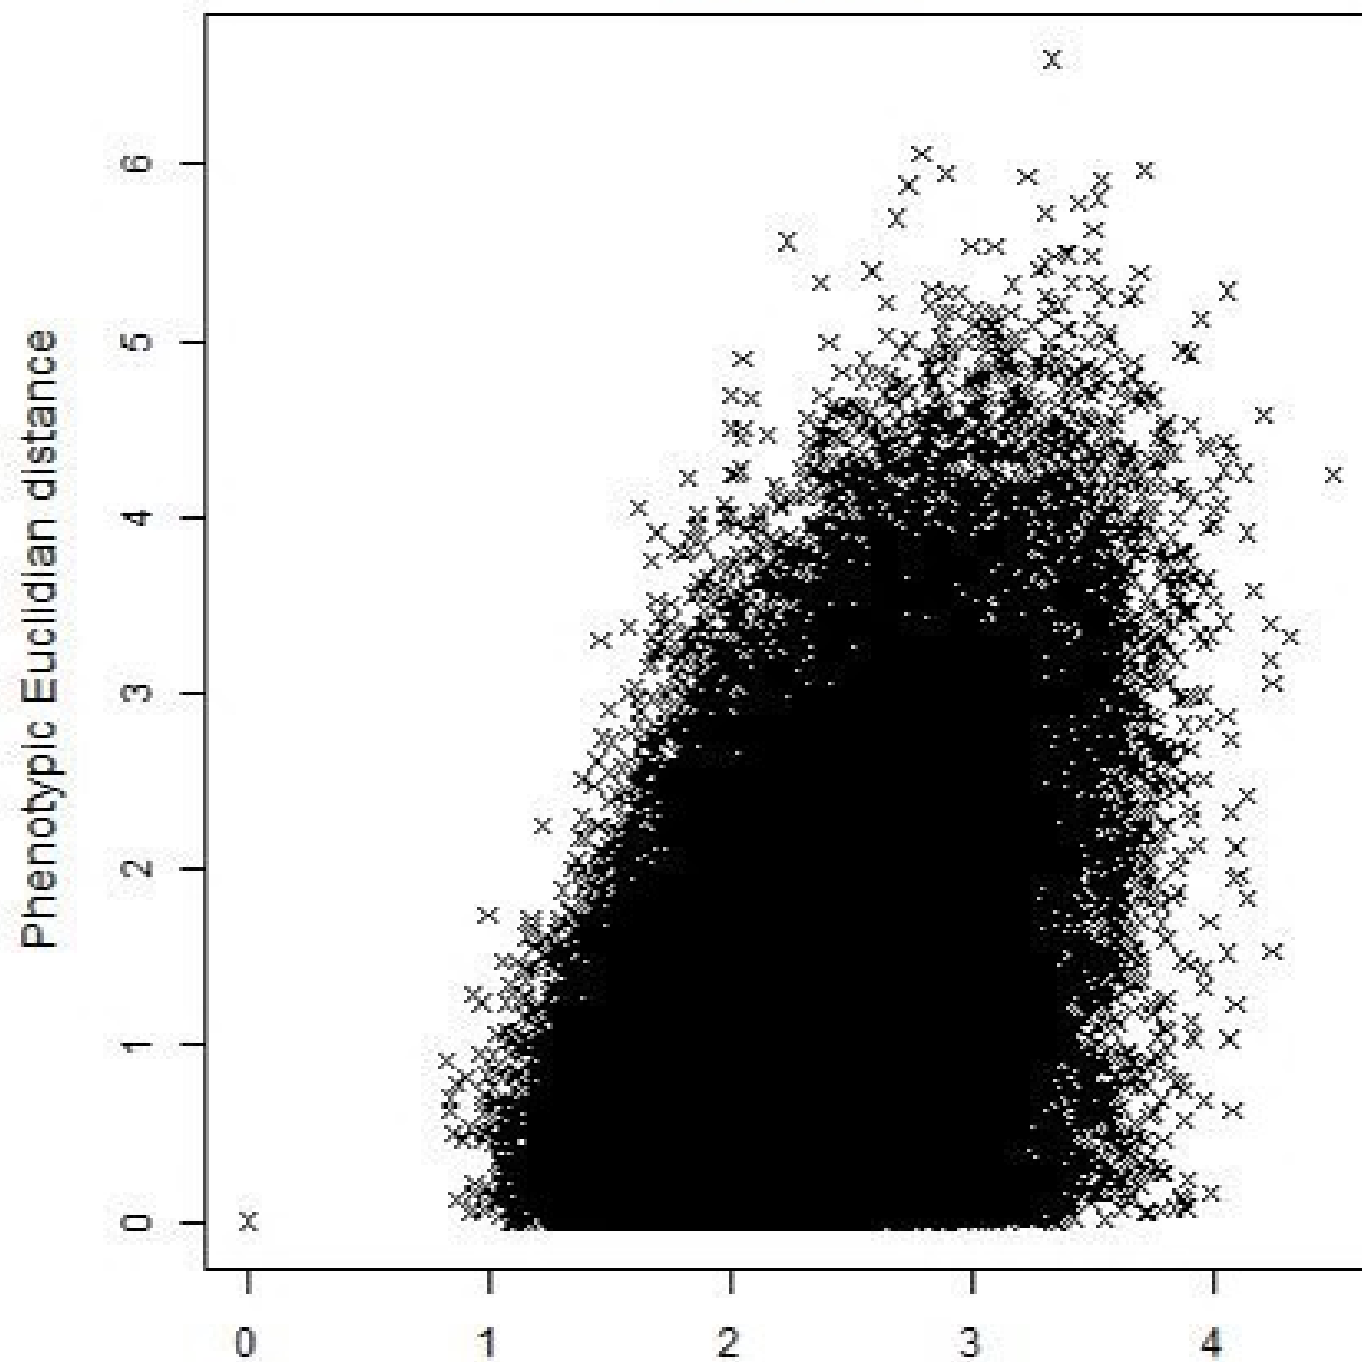

Genetic Euclidian distance (based on the 100 most significantly associated SNPs)

AHD\_po17

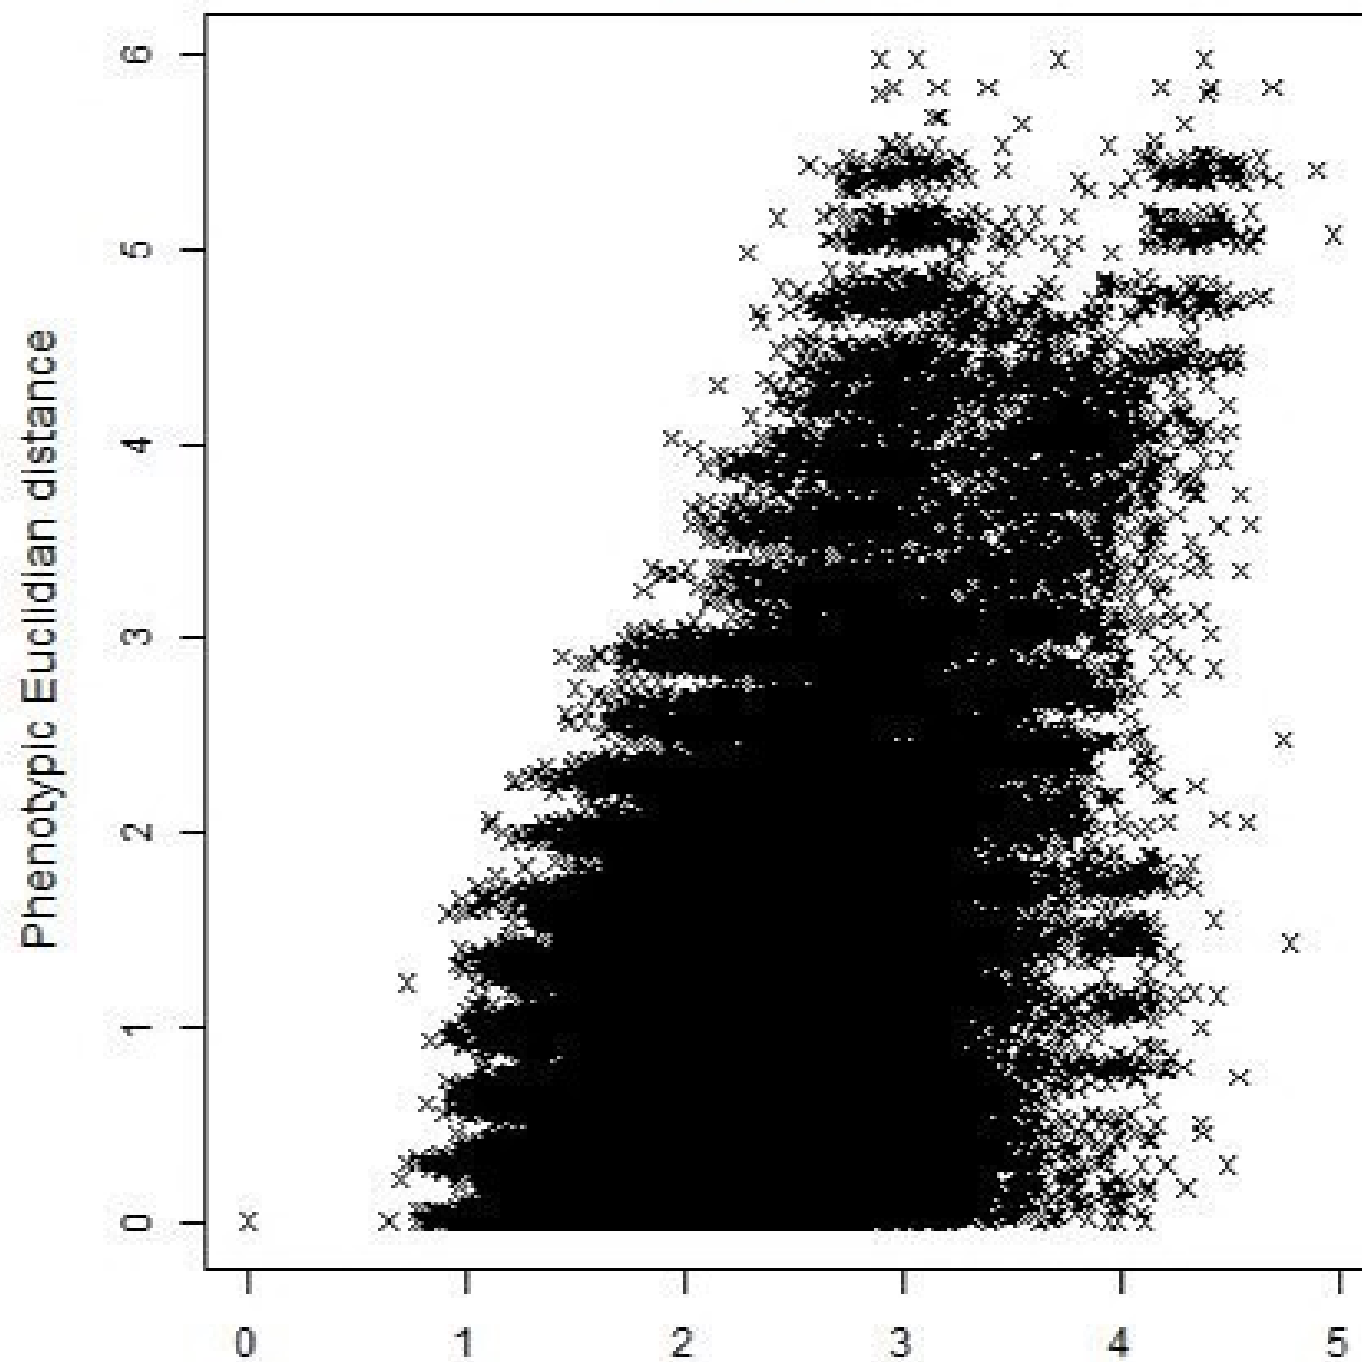

Genetic Euclidian distance (based on the 100 most significantly associated SNPs)



# AMH\_me17

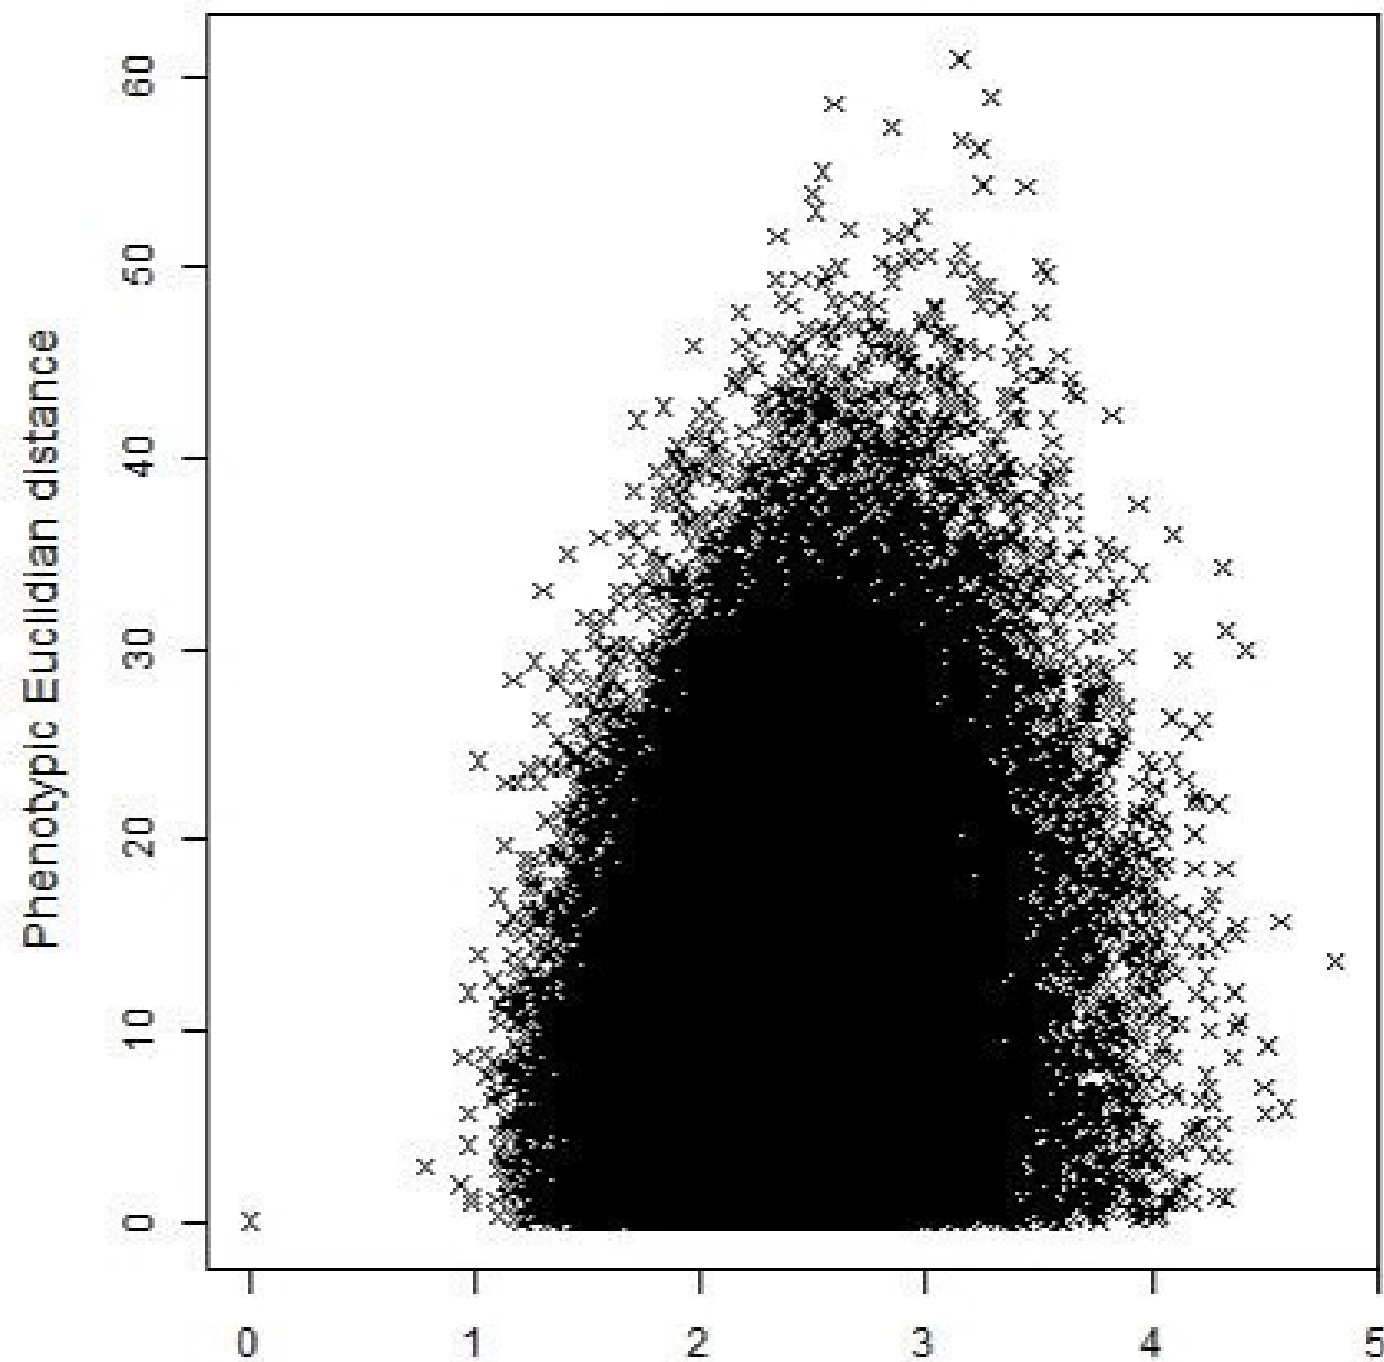

Genetic Euclidian distance (based on the 100 most significantly associated SNPs)

AMH\_po17

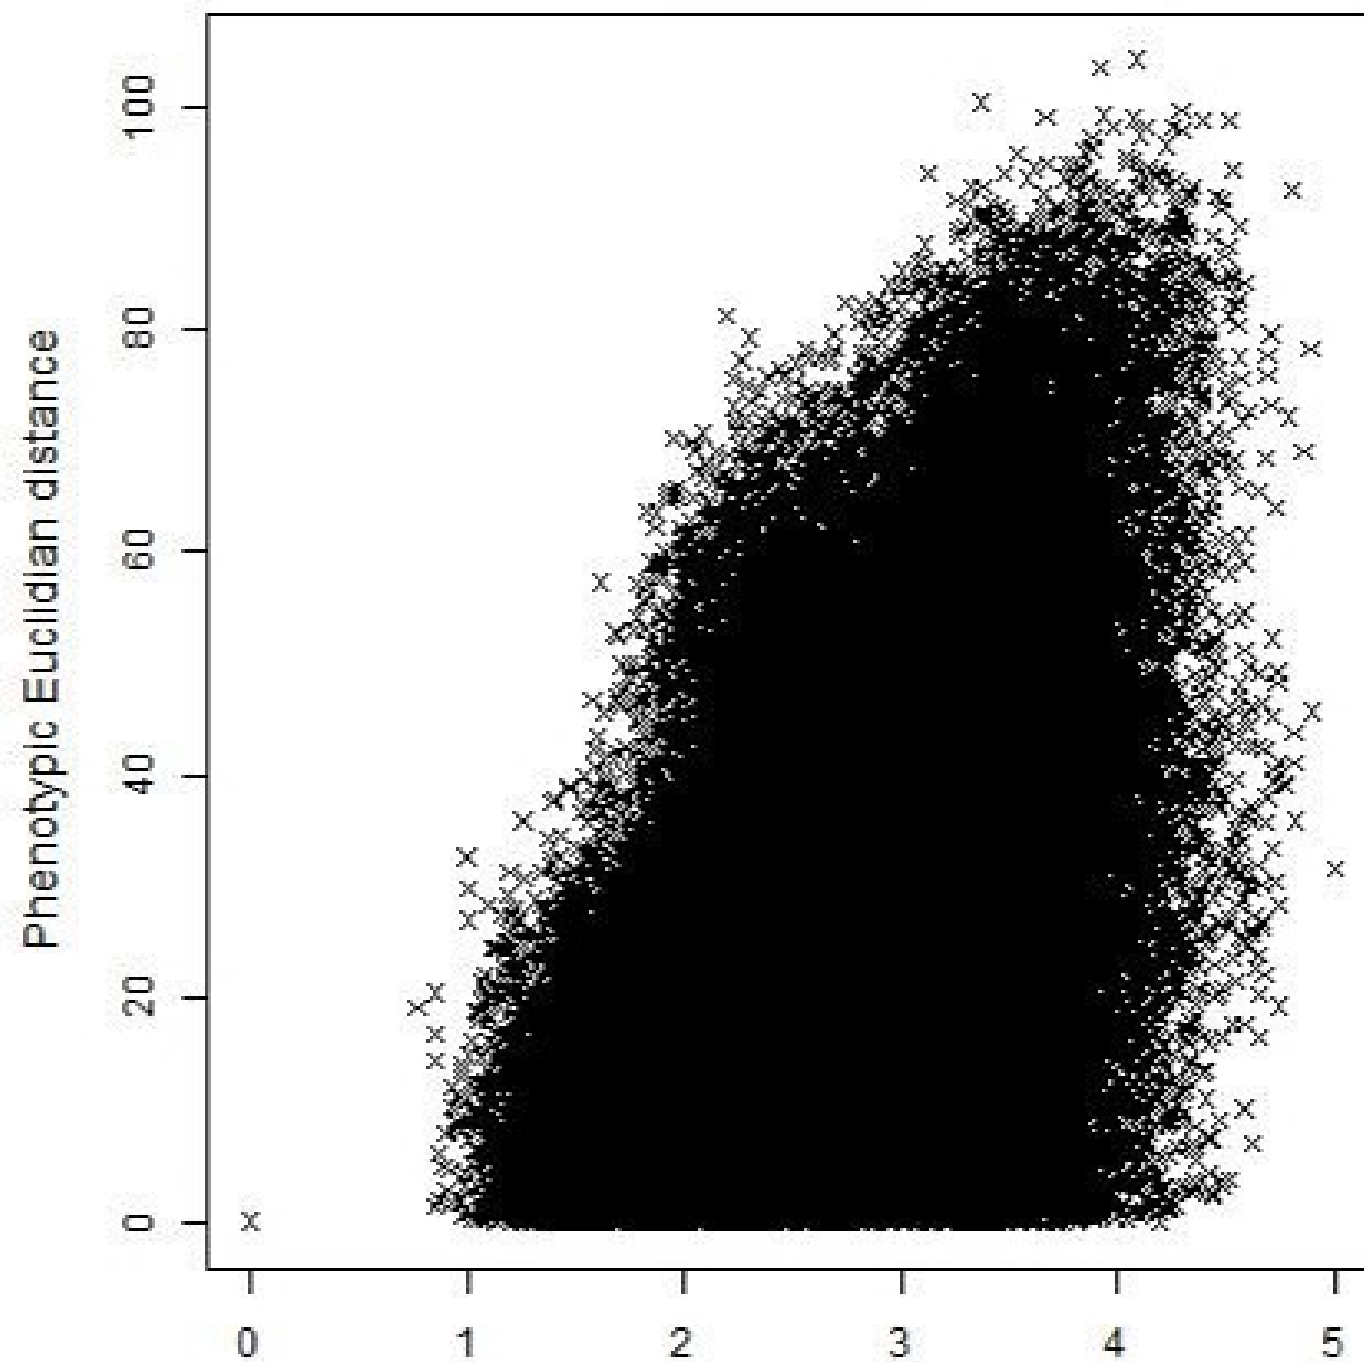

Genetic Euclidian distance (based on the 100 most significantly associated SNPs)

# CH300h\_lu16

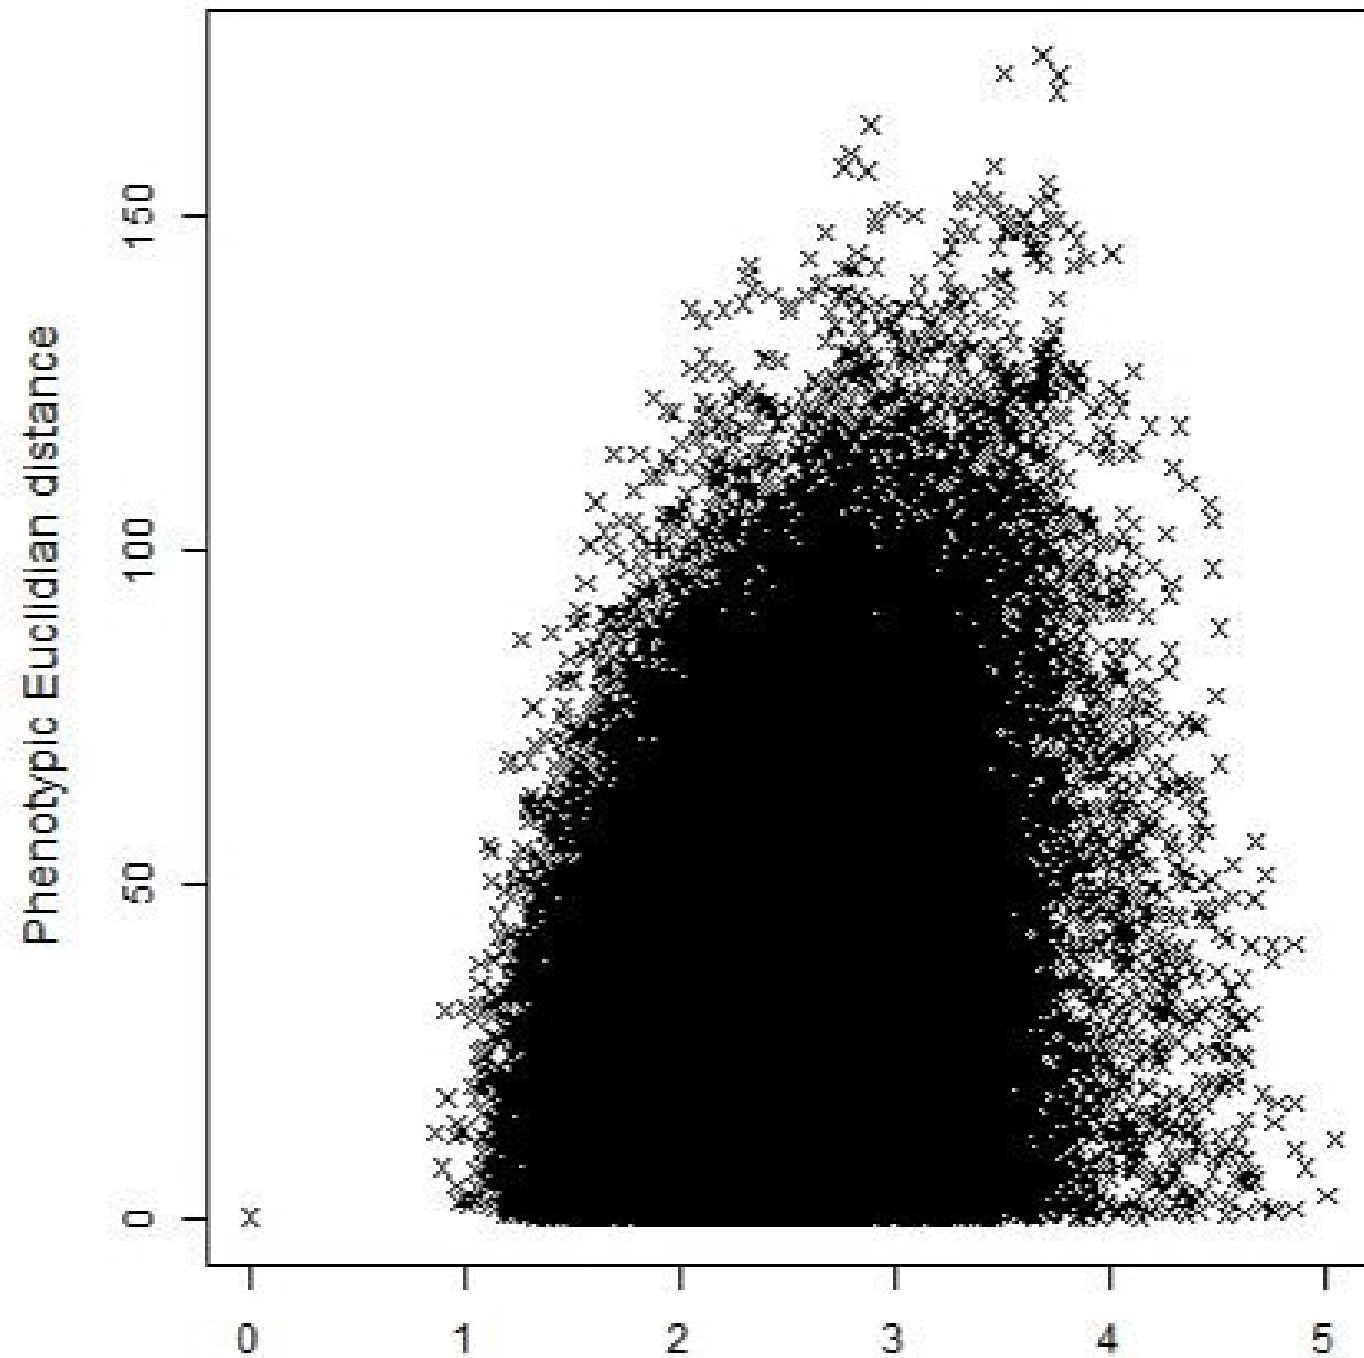

Genetic Euclidian distance (based on the 100 most significantly associated SNPs)

# CH300h\_lu17

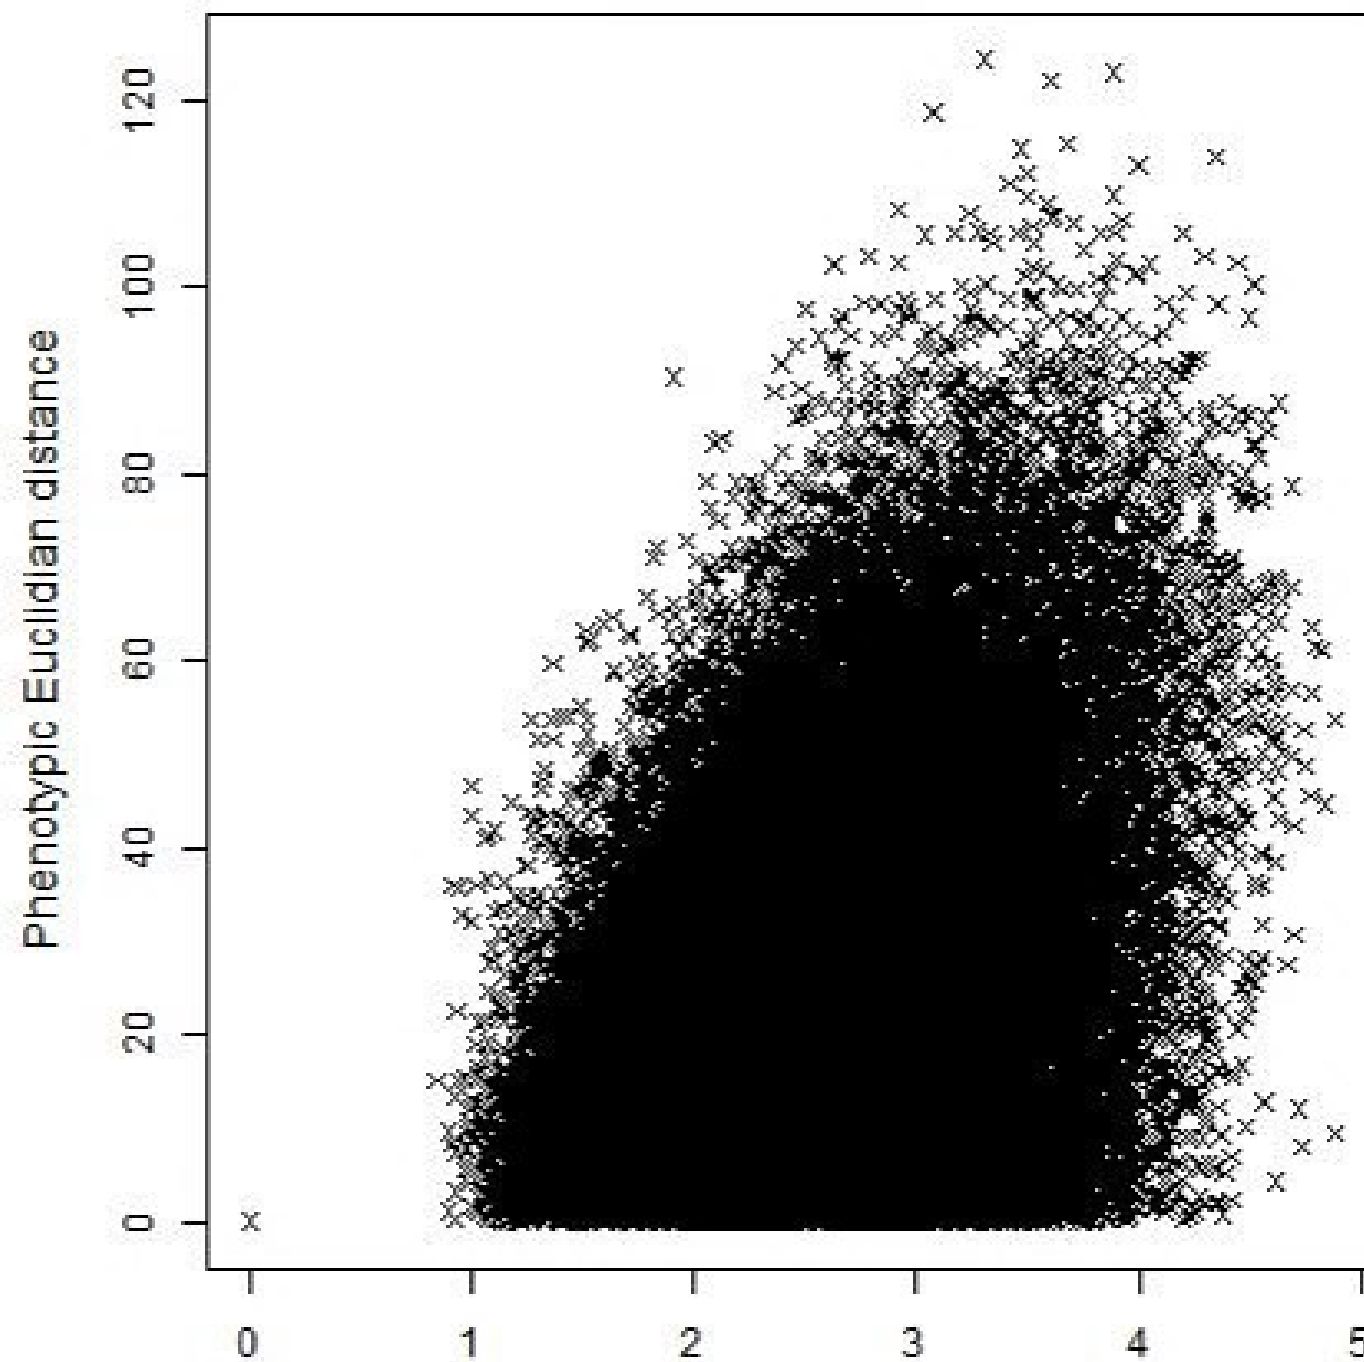

Genetic Euclidian distance (based on the 100 most significantly associated SNPs)

CH300h\_po16

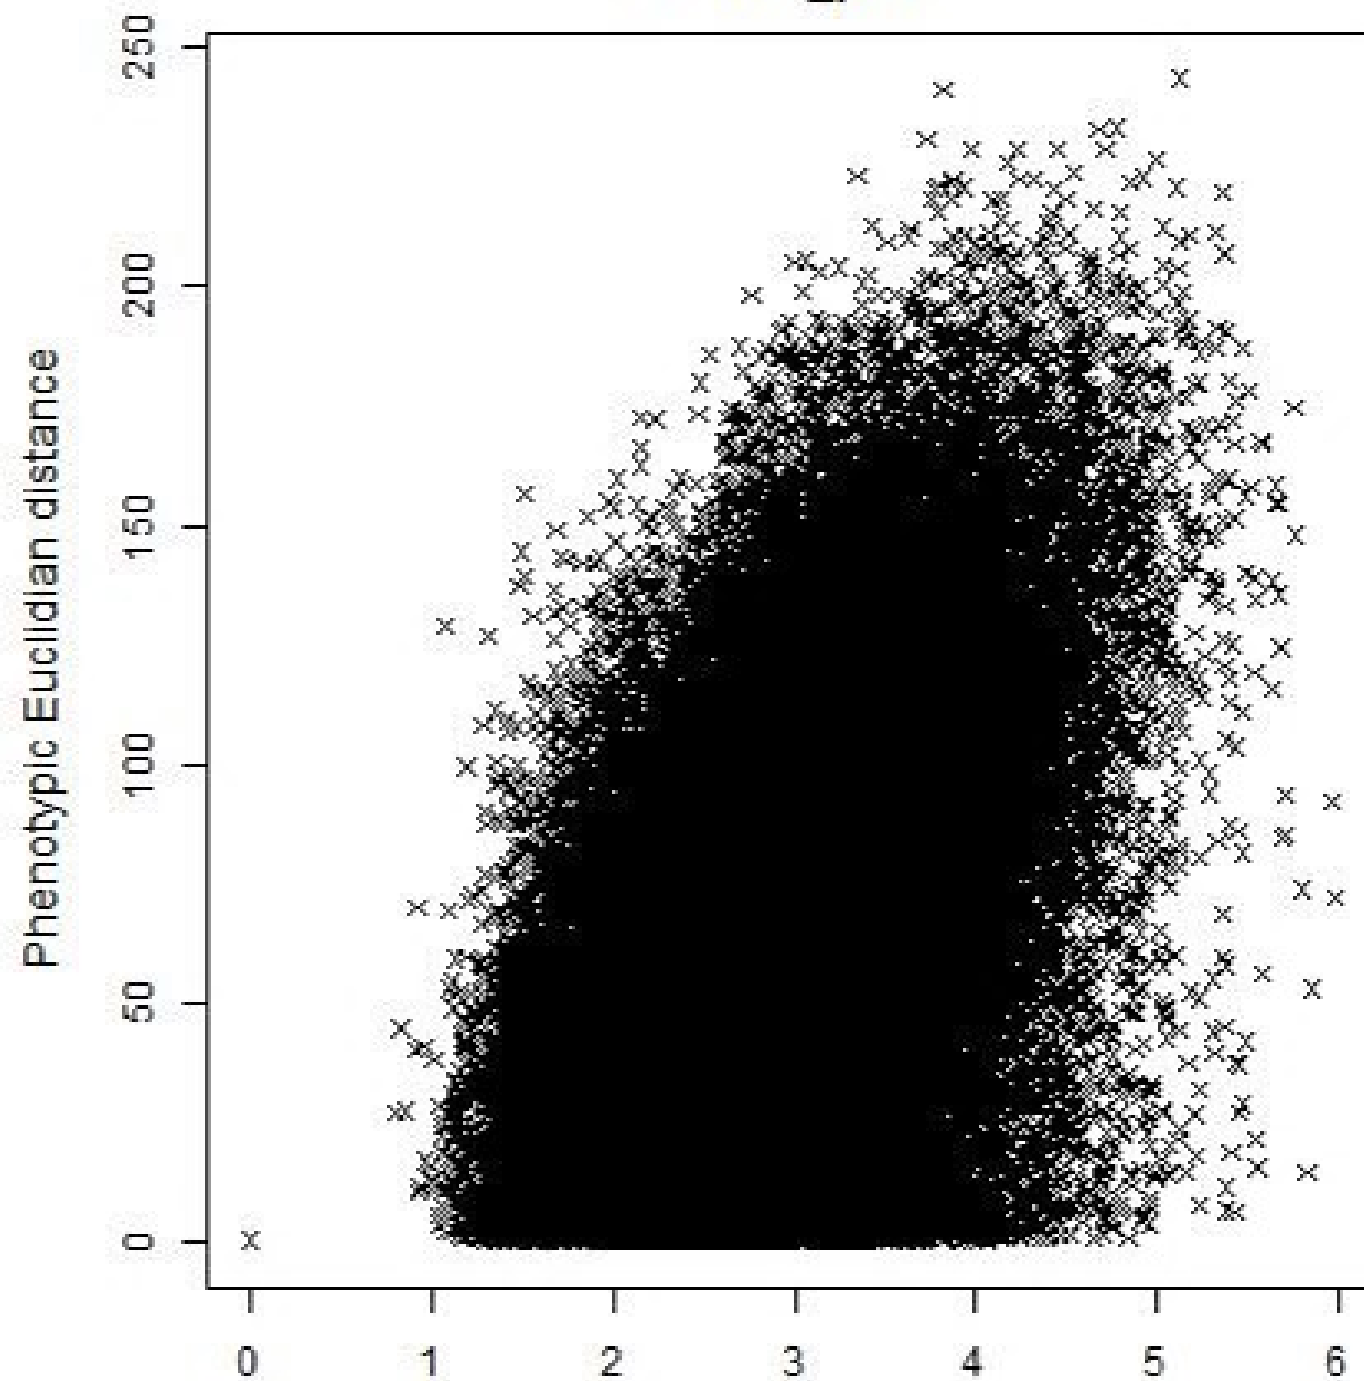

Genetic Euclidian distance (based on the 100 most significantly associated SNPs)

CH300h\_po17

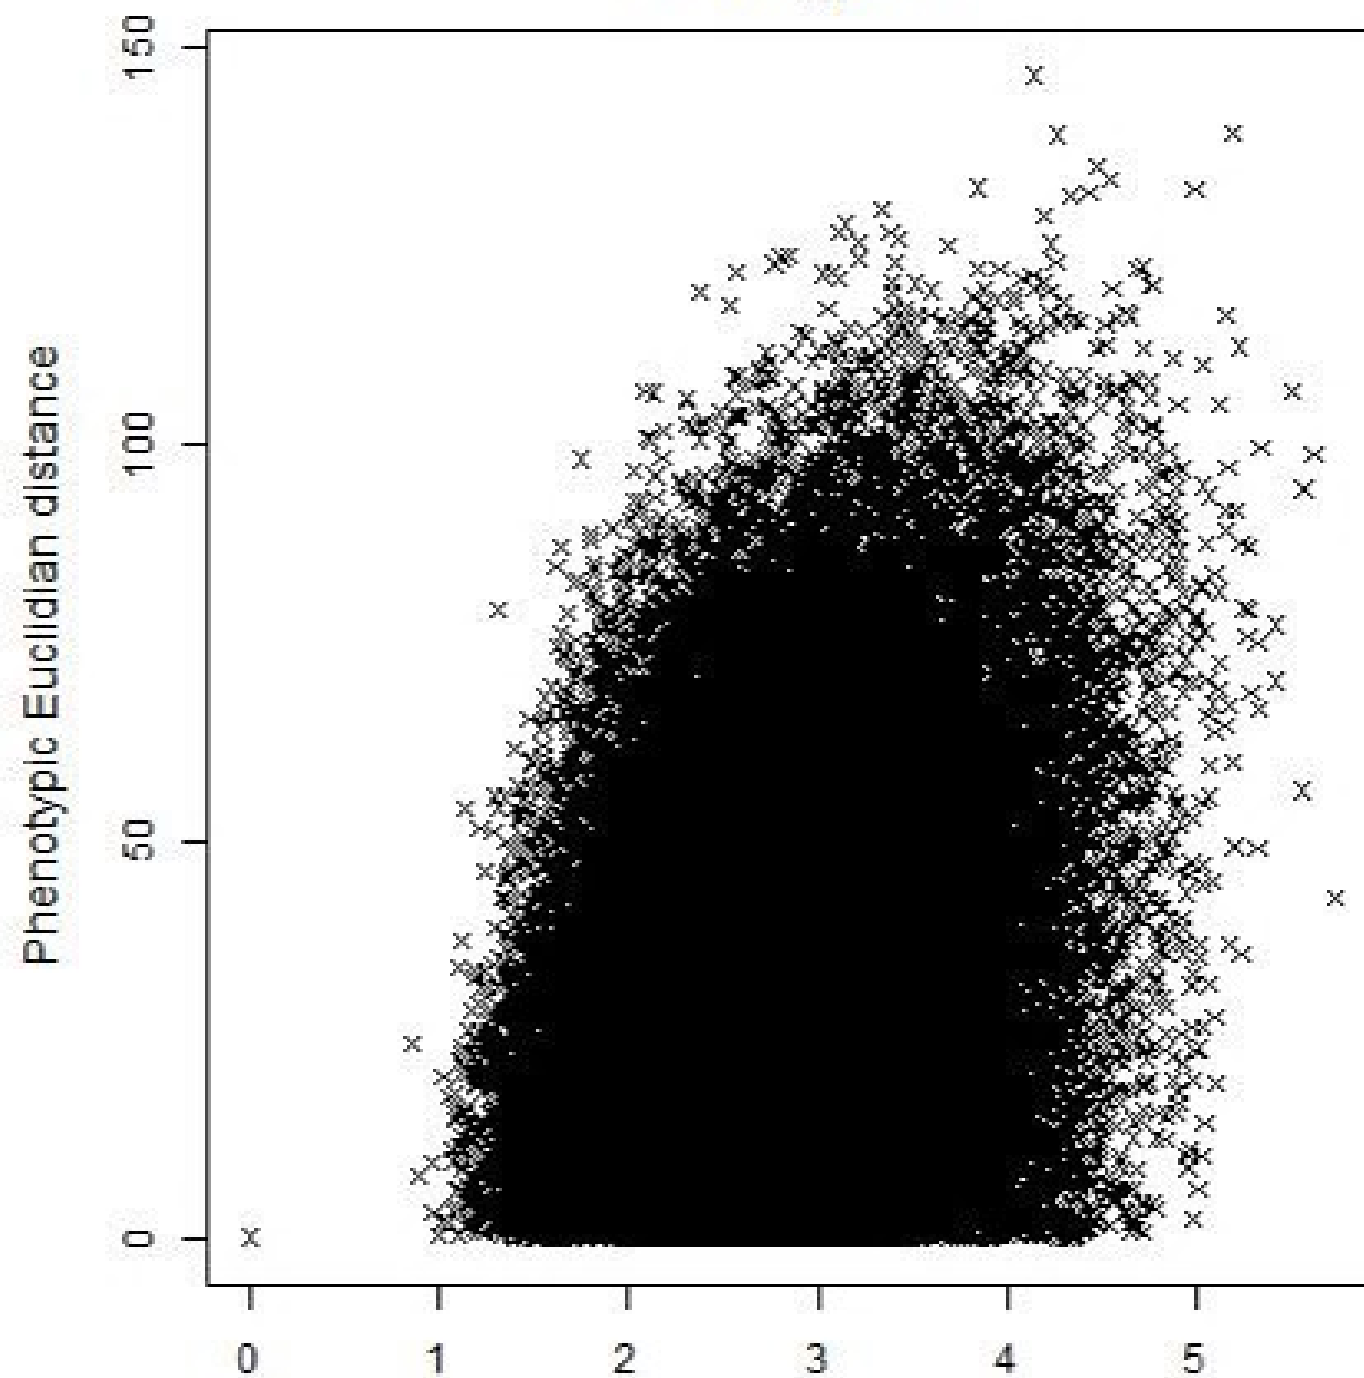

Genetic Euclidian distance (based on the 100 most significantly associated SNPs)

CH400h\_lu16

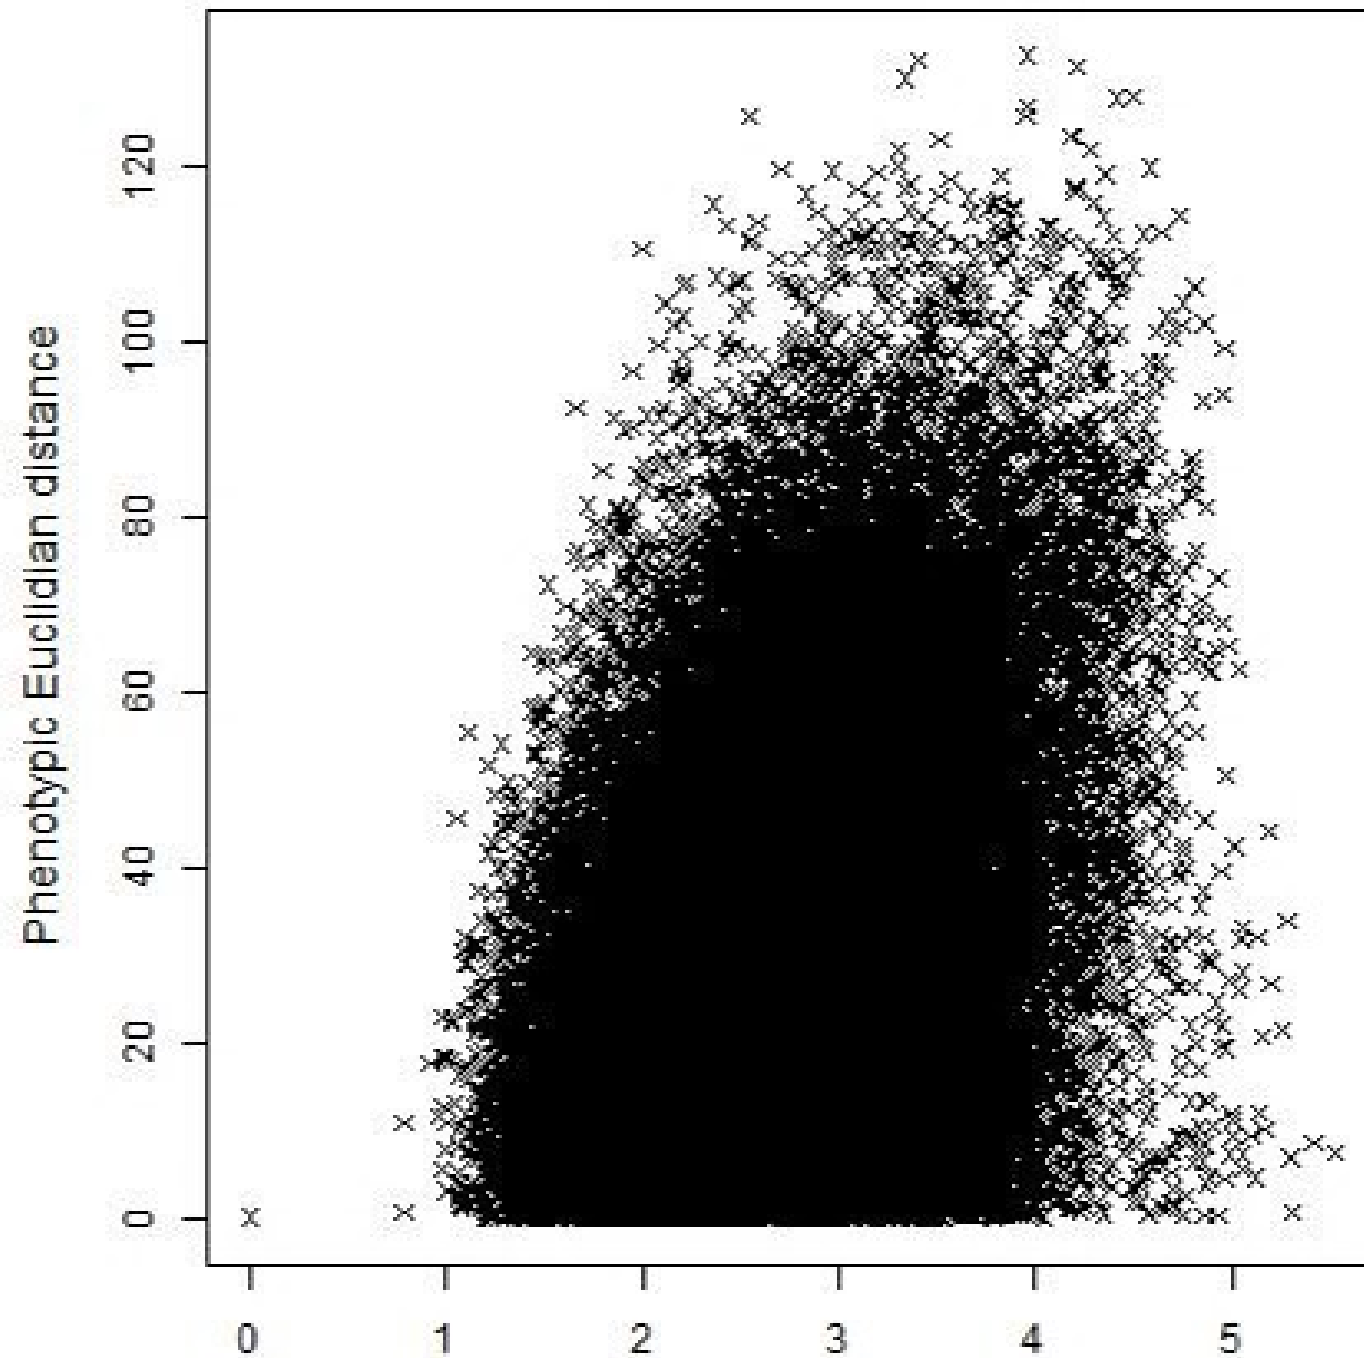

Genetic Euclidian distance (based on the 100 most significantly associated SNPs)

# CH400h\_lu17

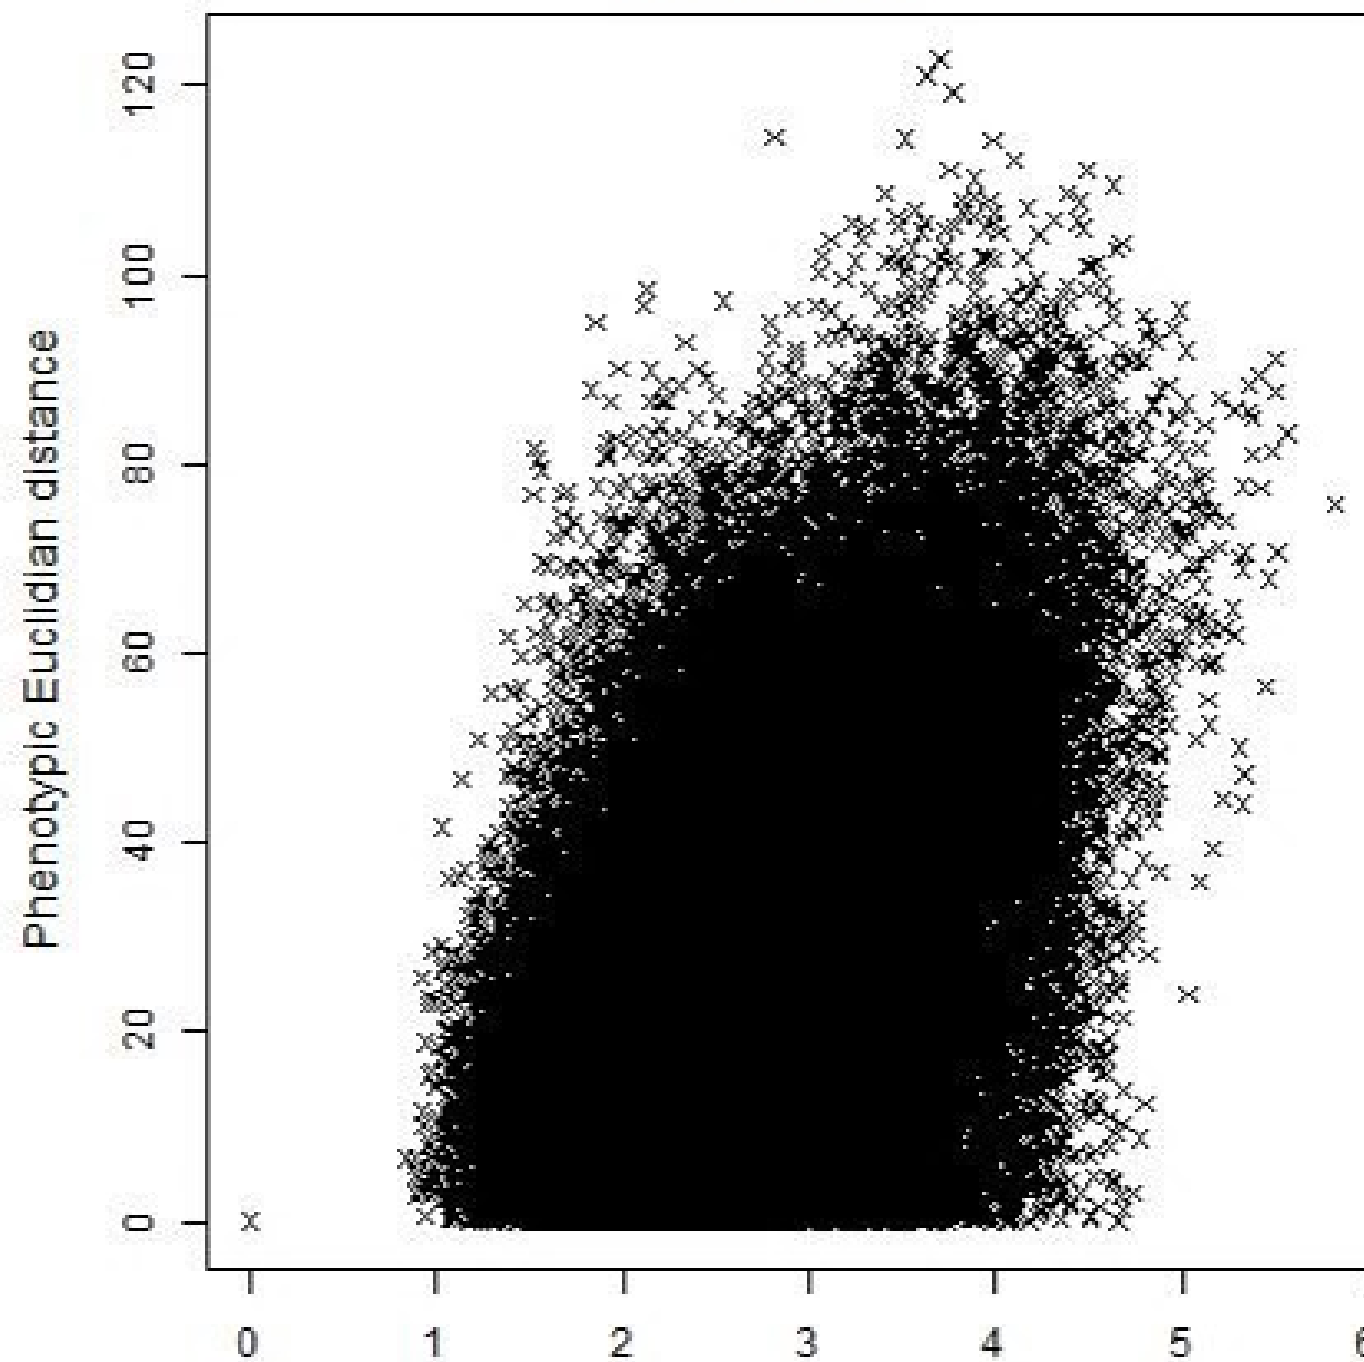

Genetic Euclidian distance (based on the 100 most significantly associated SNPs)



CH400h\_po16

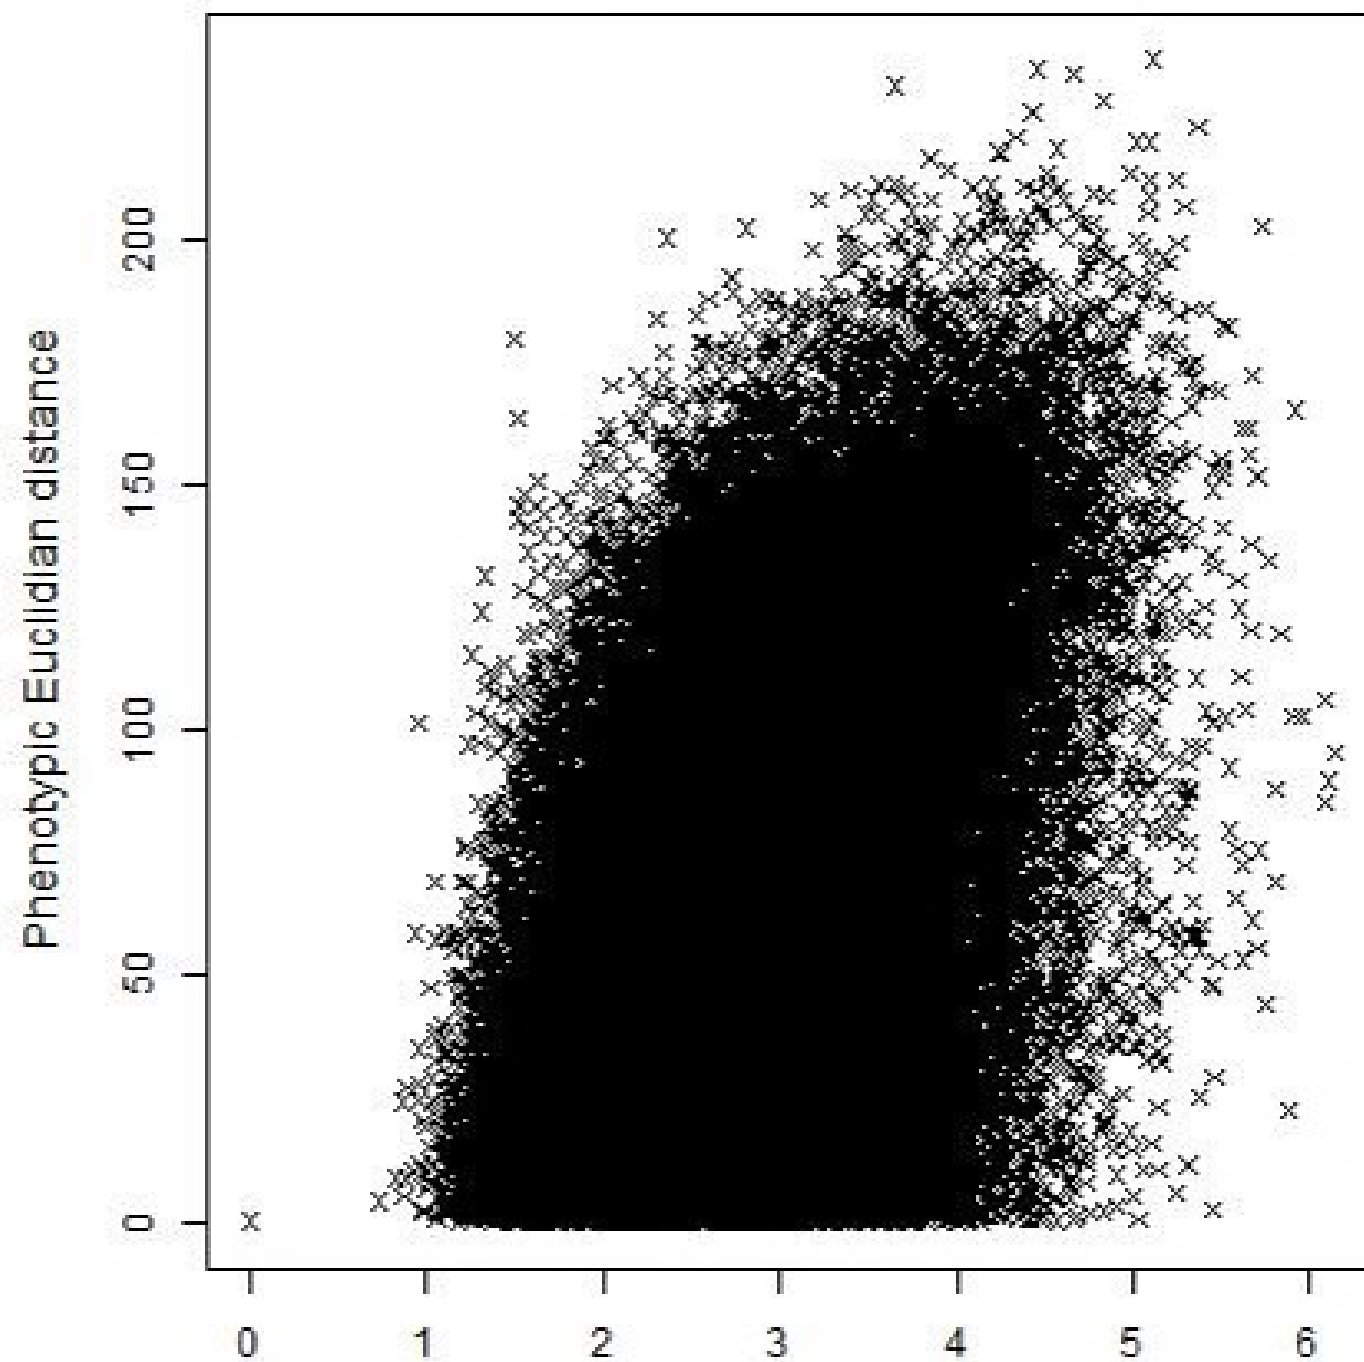

Genetic Euclidian distance (based on the 100 most significantly associated SNPs)

CH400h\_po17

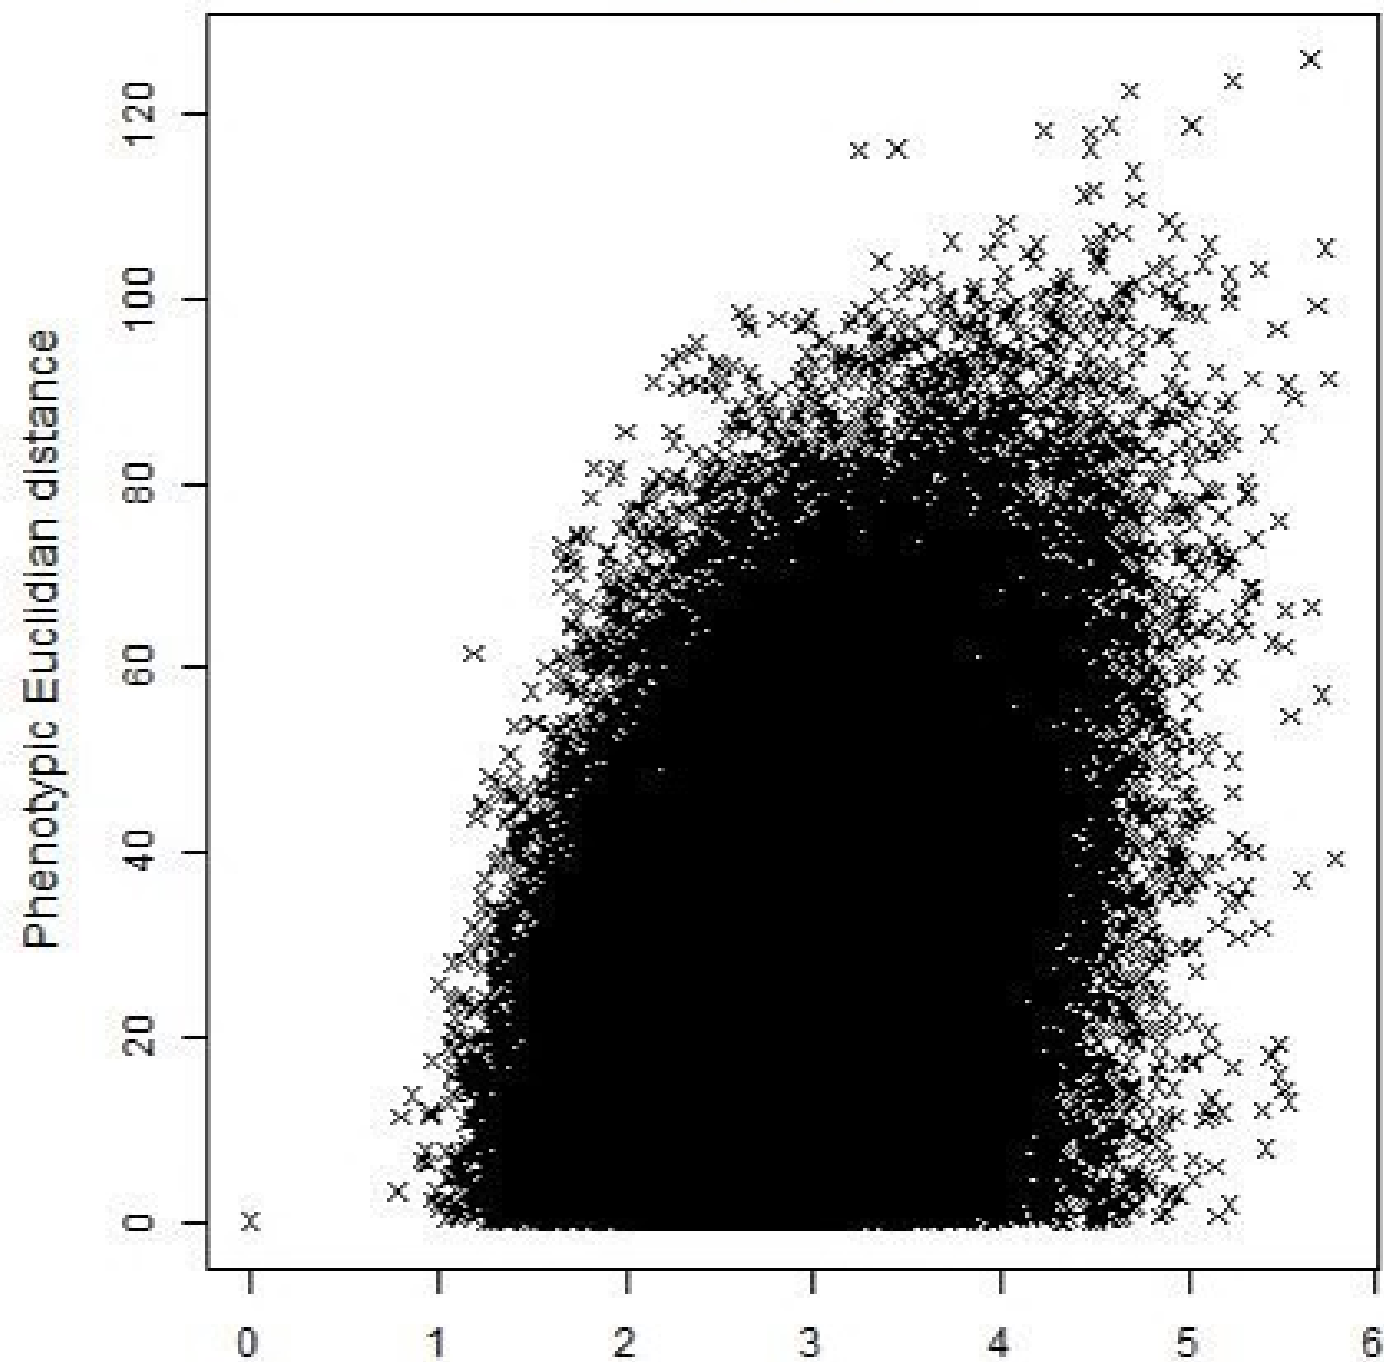

Genetic Euclidian distance (based on the 100 most significantly associated SNPs)

# CHs300\_lu16

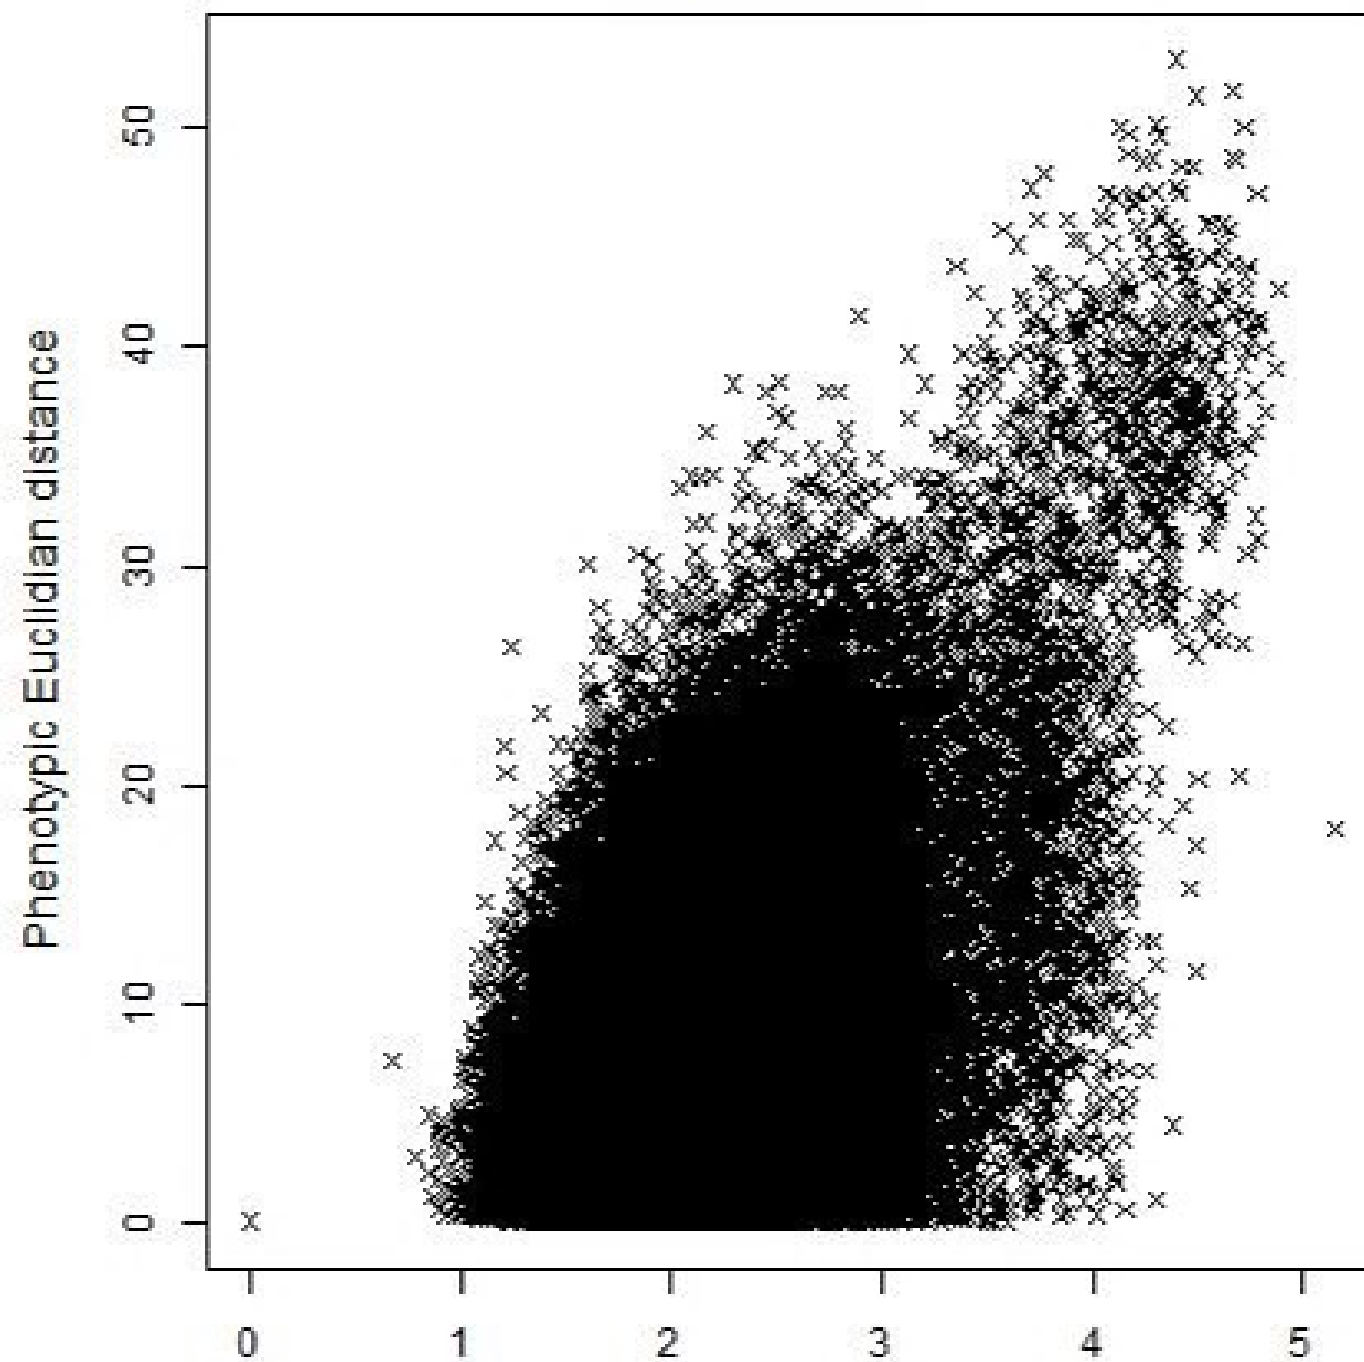

Genetic Euclidian distance (based on the 100 most significantly associated SNPs)

# CHs300\_lu17

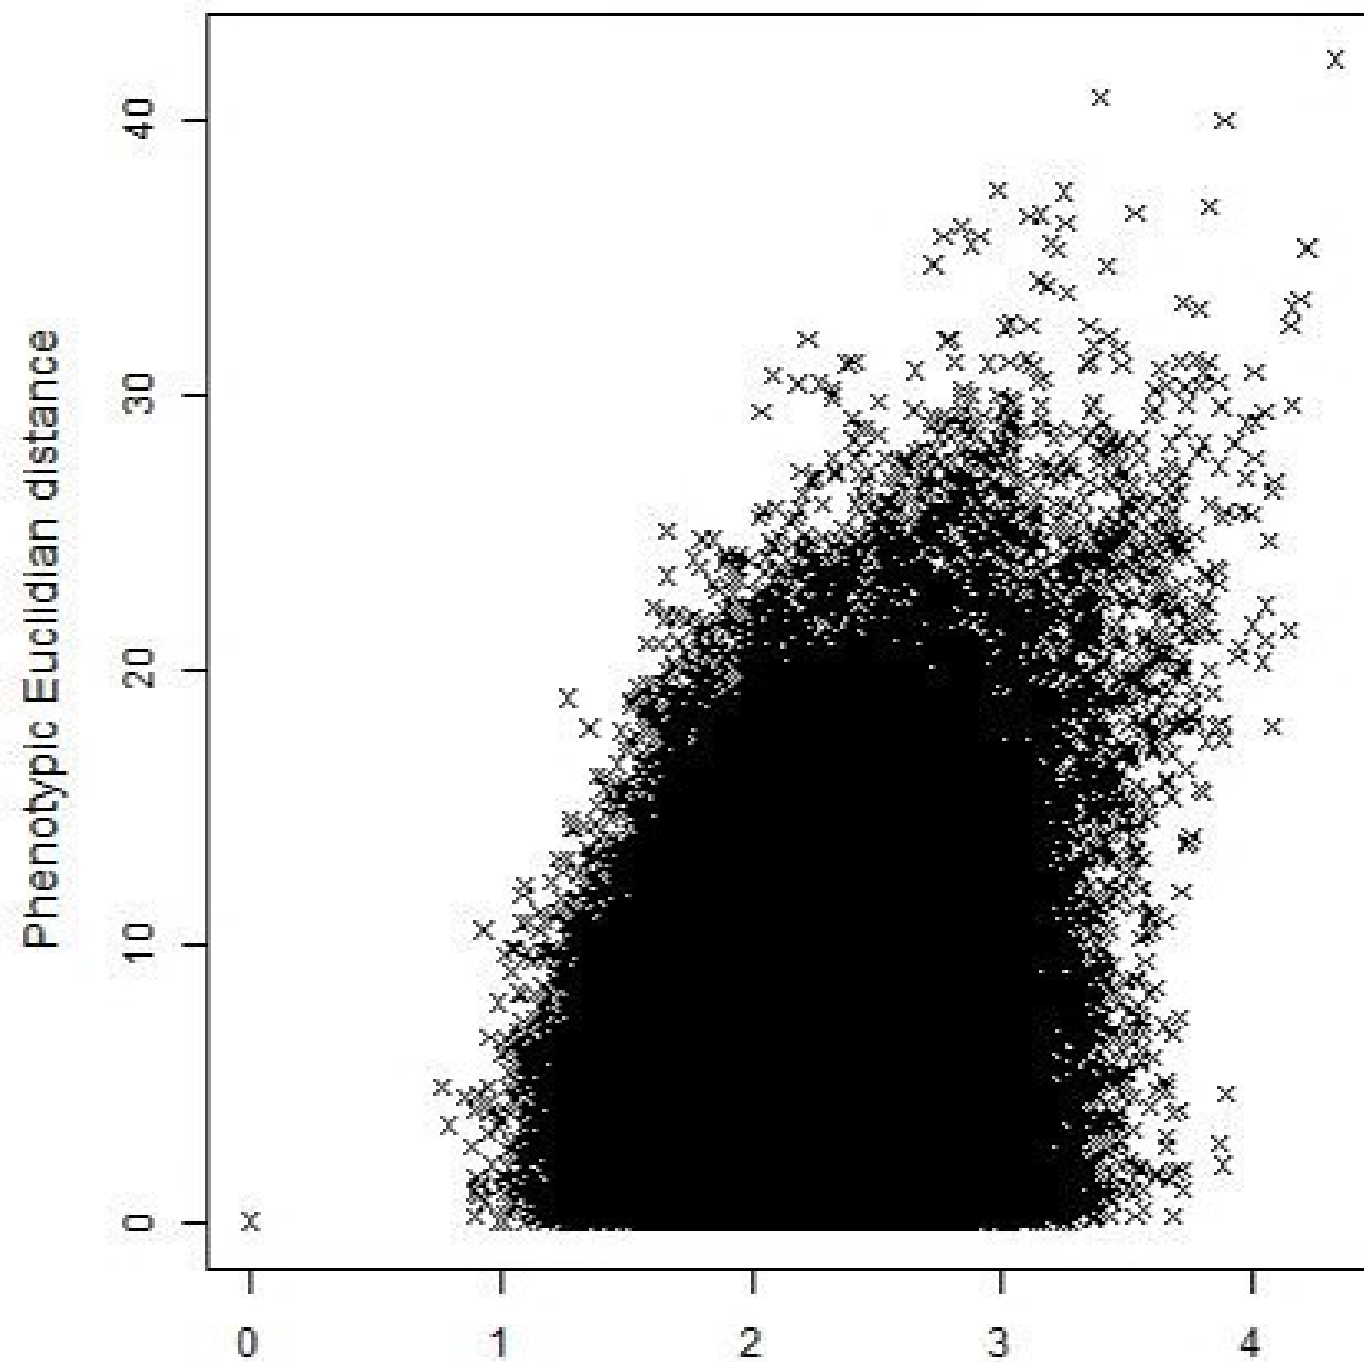

Genetic Euclidian distance (based on the 100 most significantly associated SNPs)

CHs300\_me16

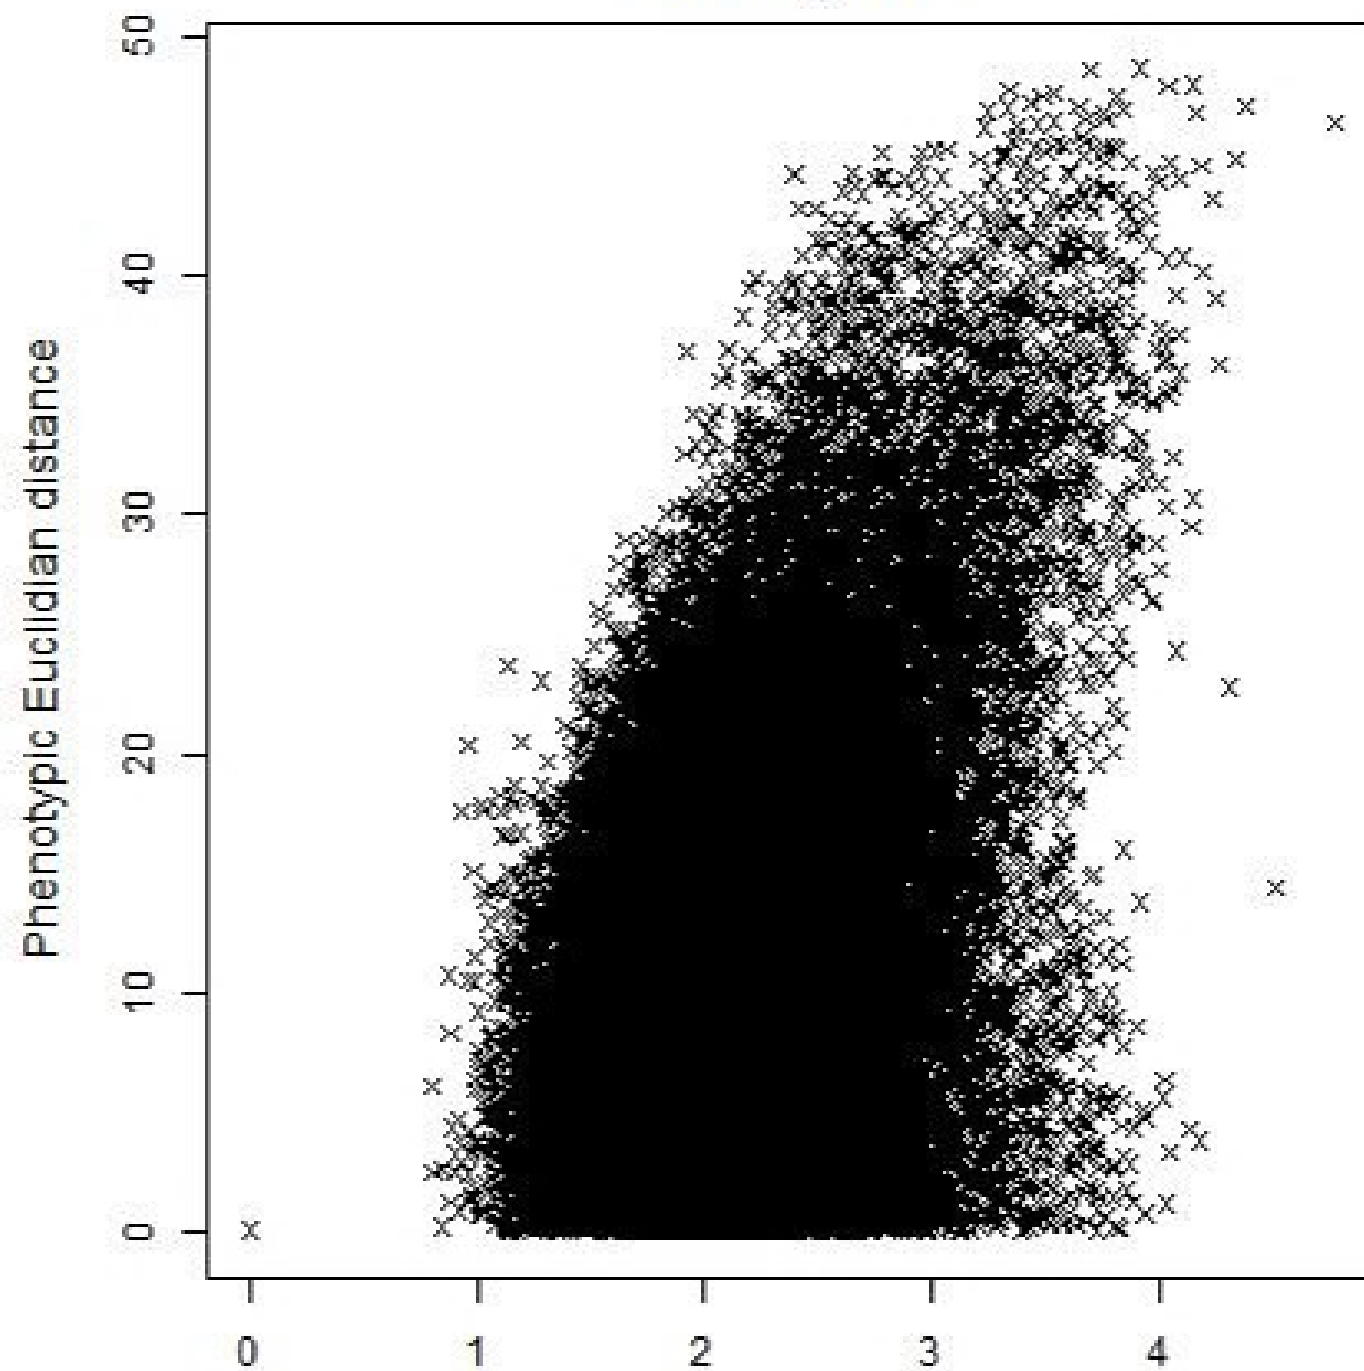

Genetic Euclidian distance (based on the 100 most significantly associated SNPs)

# CHs300\_me17

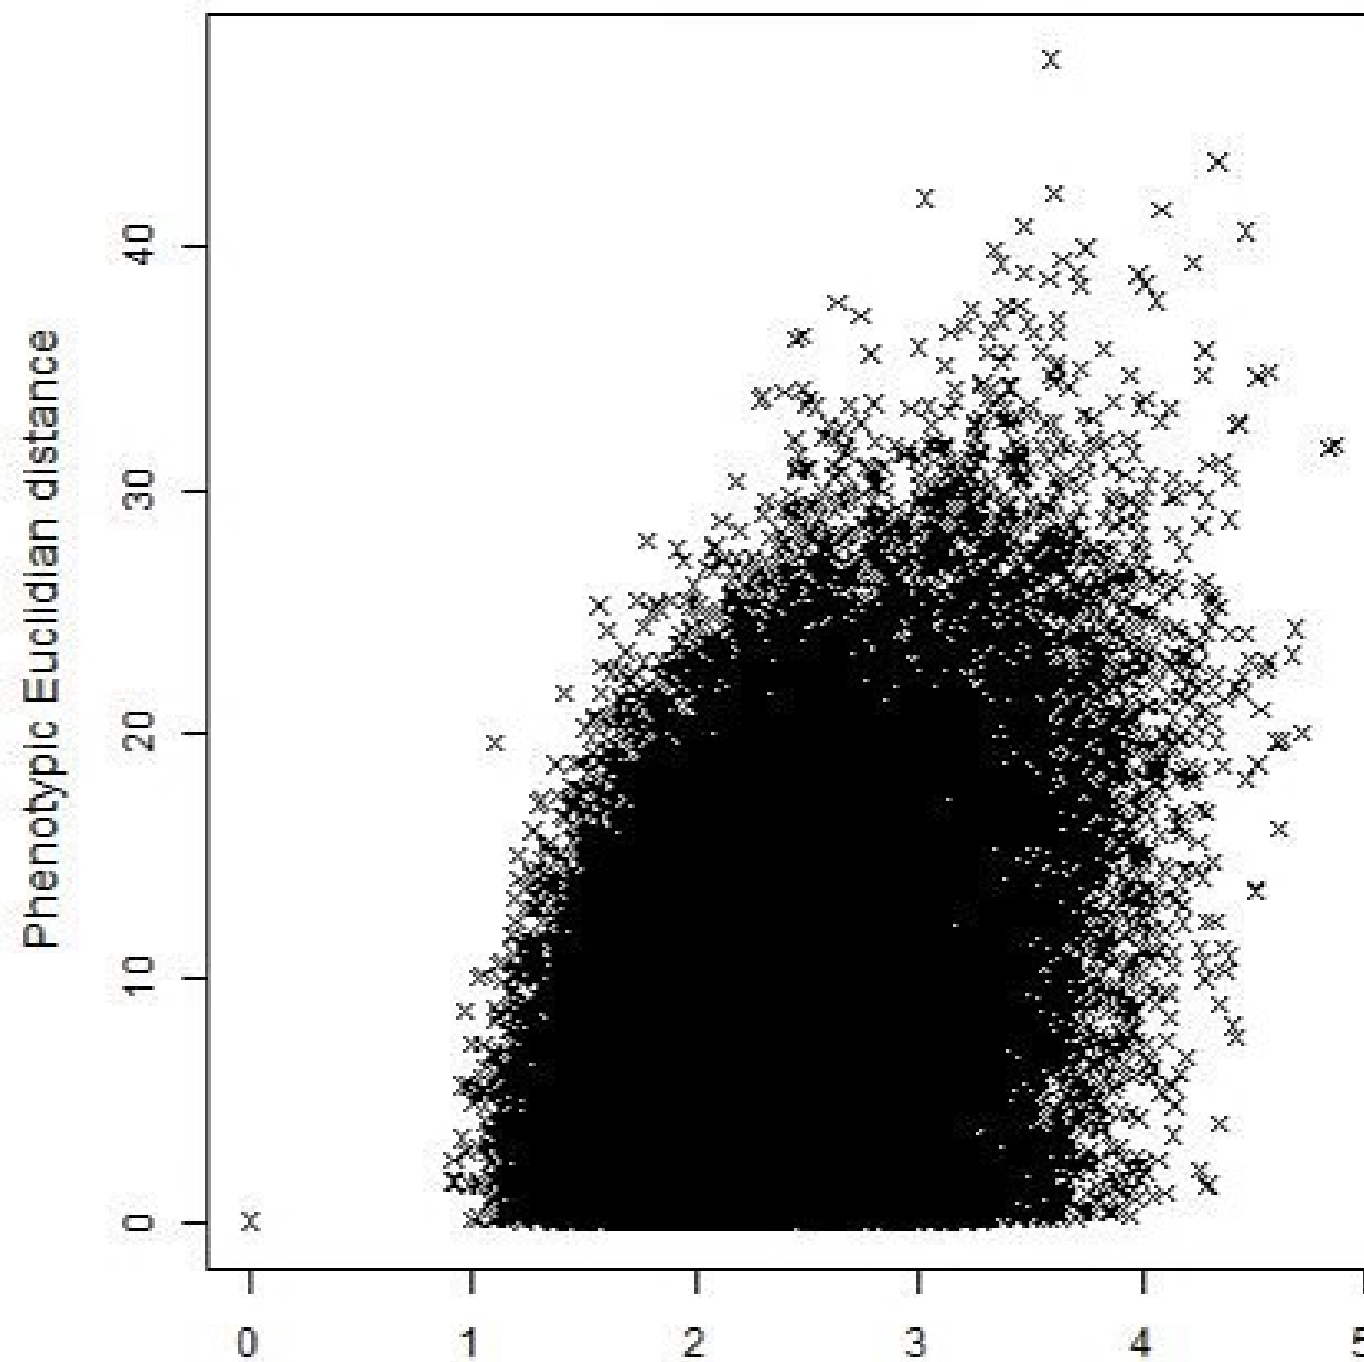

Genetic Euclidian distance (based on the 100 most significantly associated SNPs)

CHs300\_po16

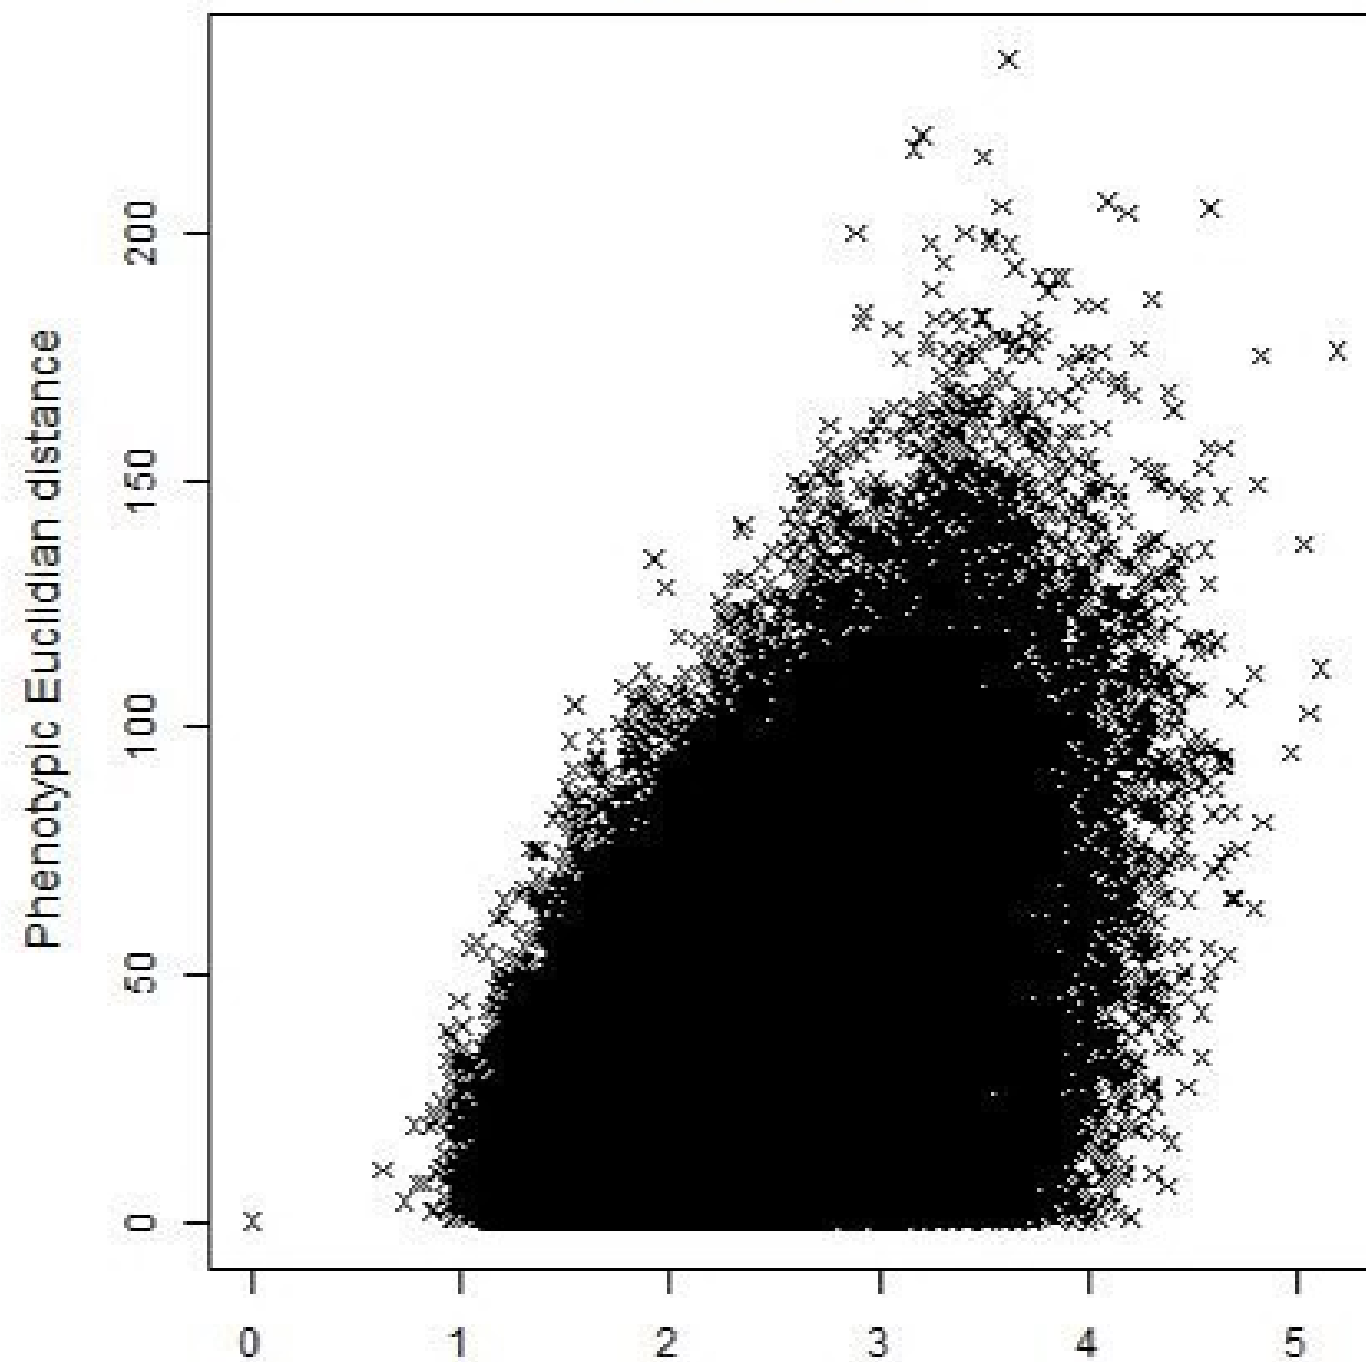

Genetic Euclidian distance (based on the 100 most significantly associated SNPs)

# CHs300\_po17

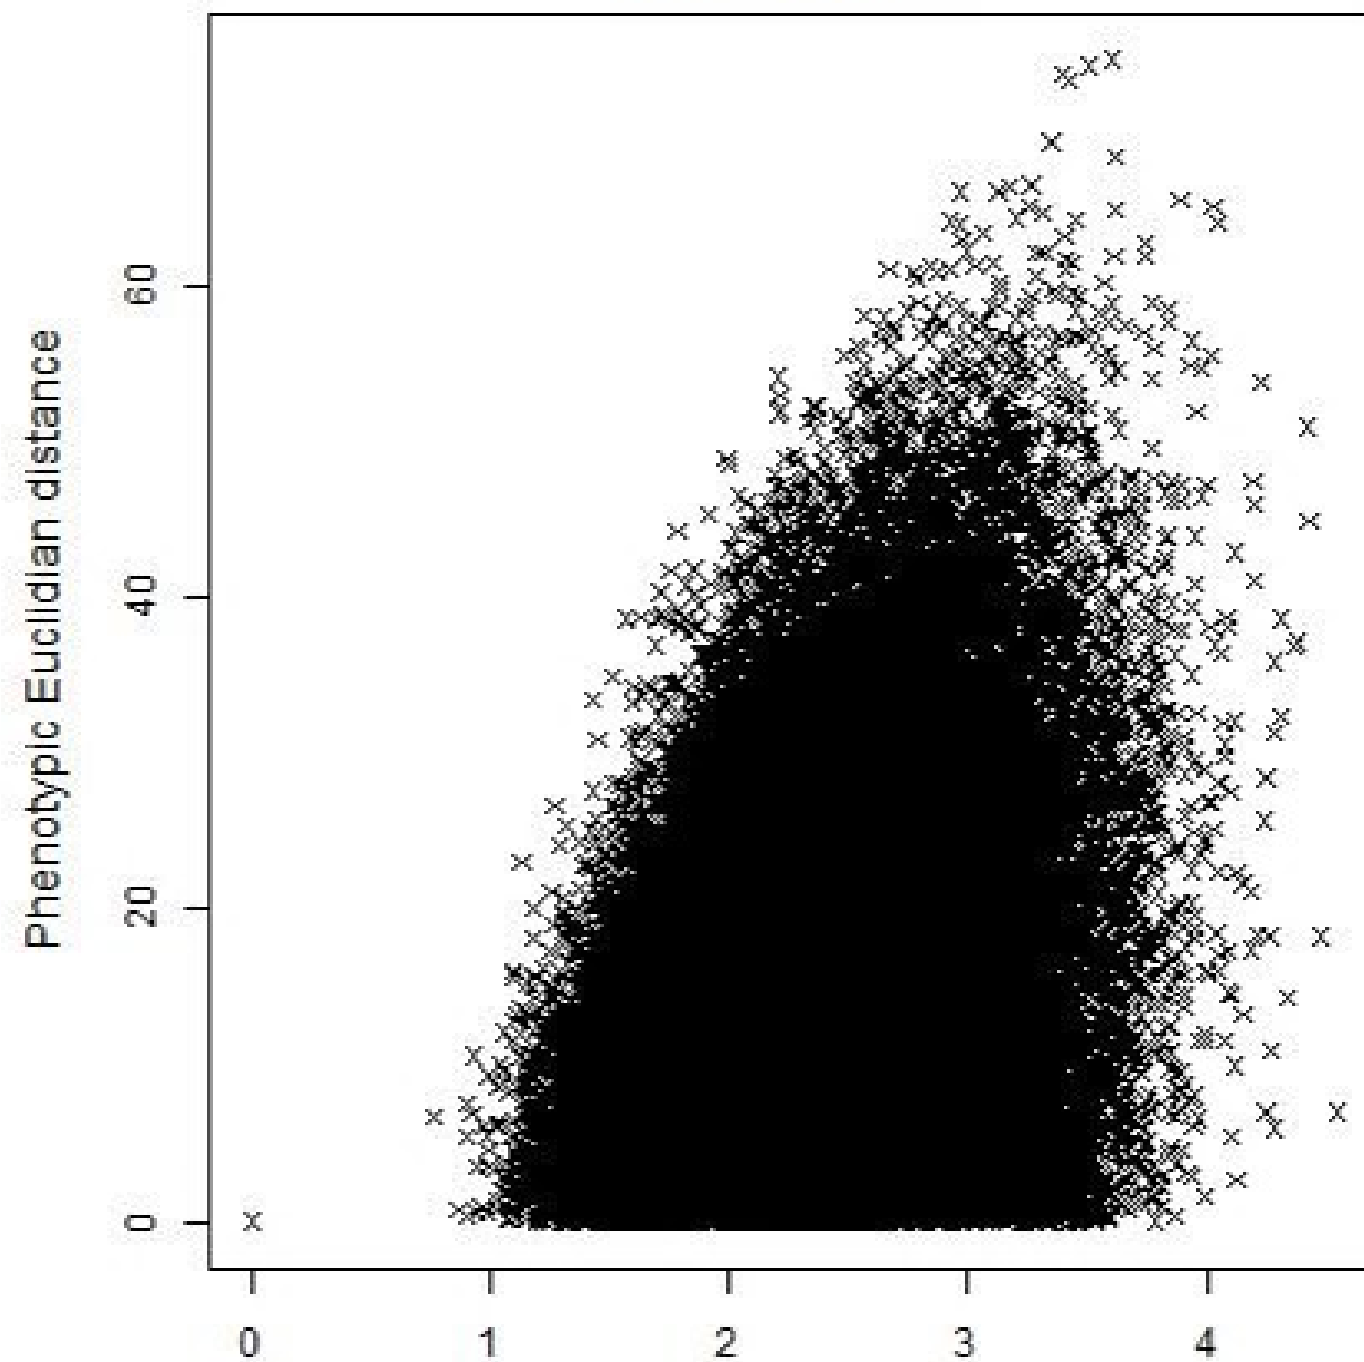

Genetic Euclidian distance (based on the 100 most significantly associated SNPs)



# CHs500\_lu16

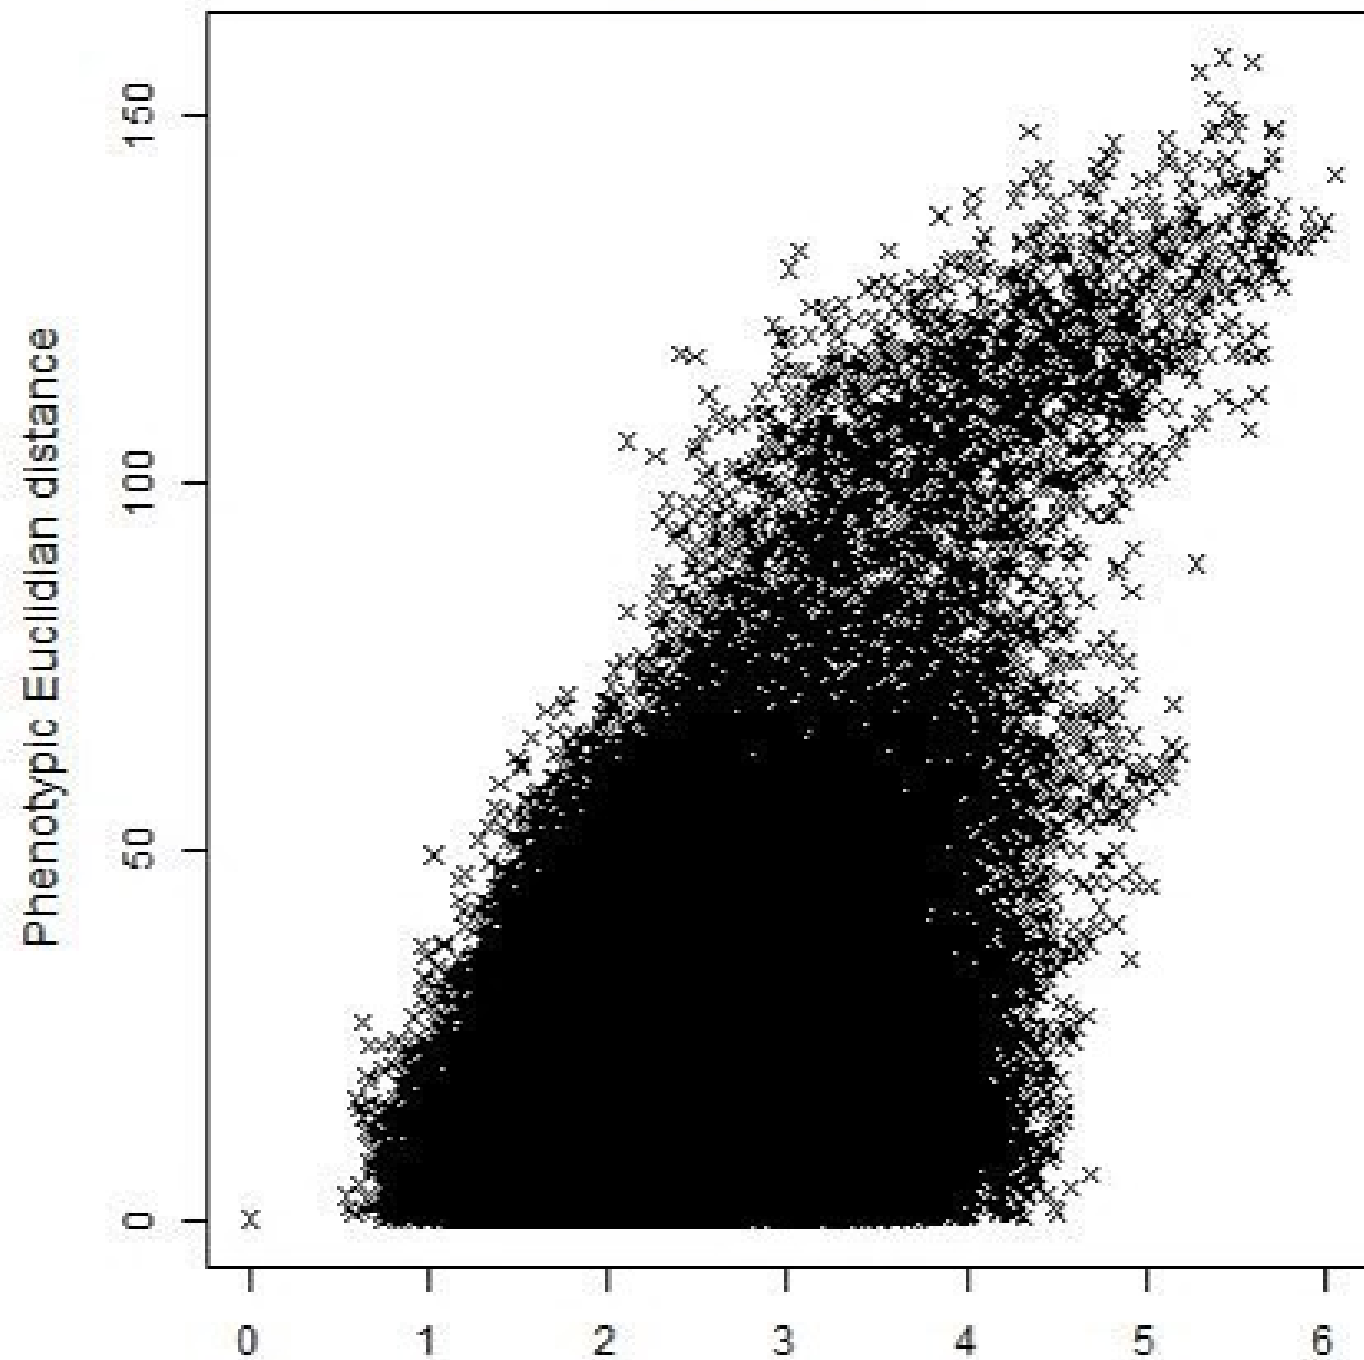

Genetic Euclidian distance (based on the 100 most significantly associated SNPs)

# CHs500\_lu17

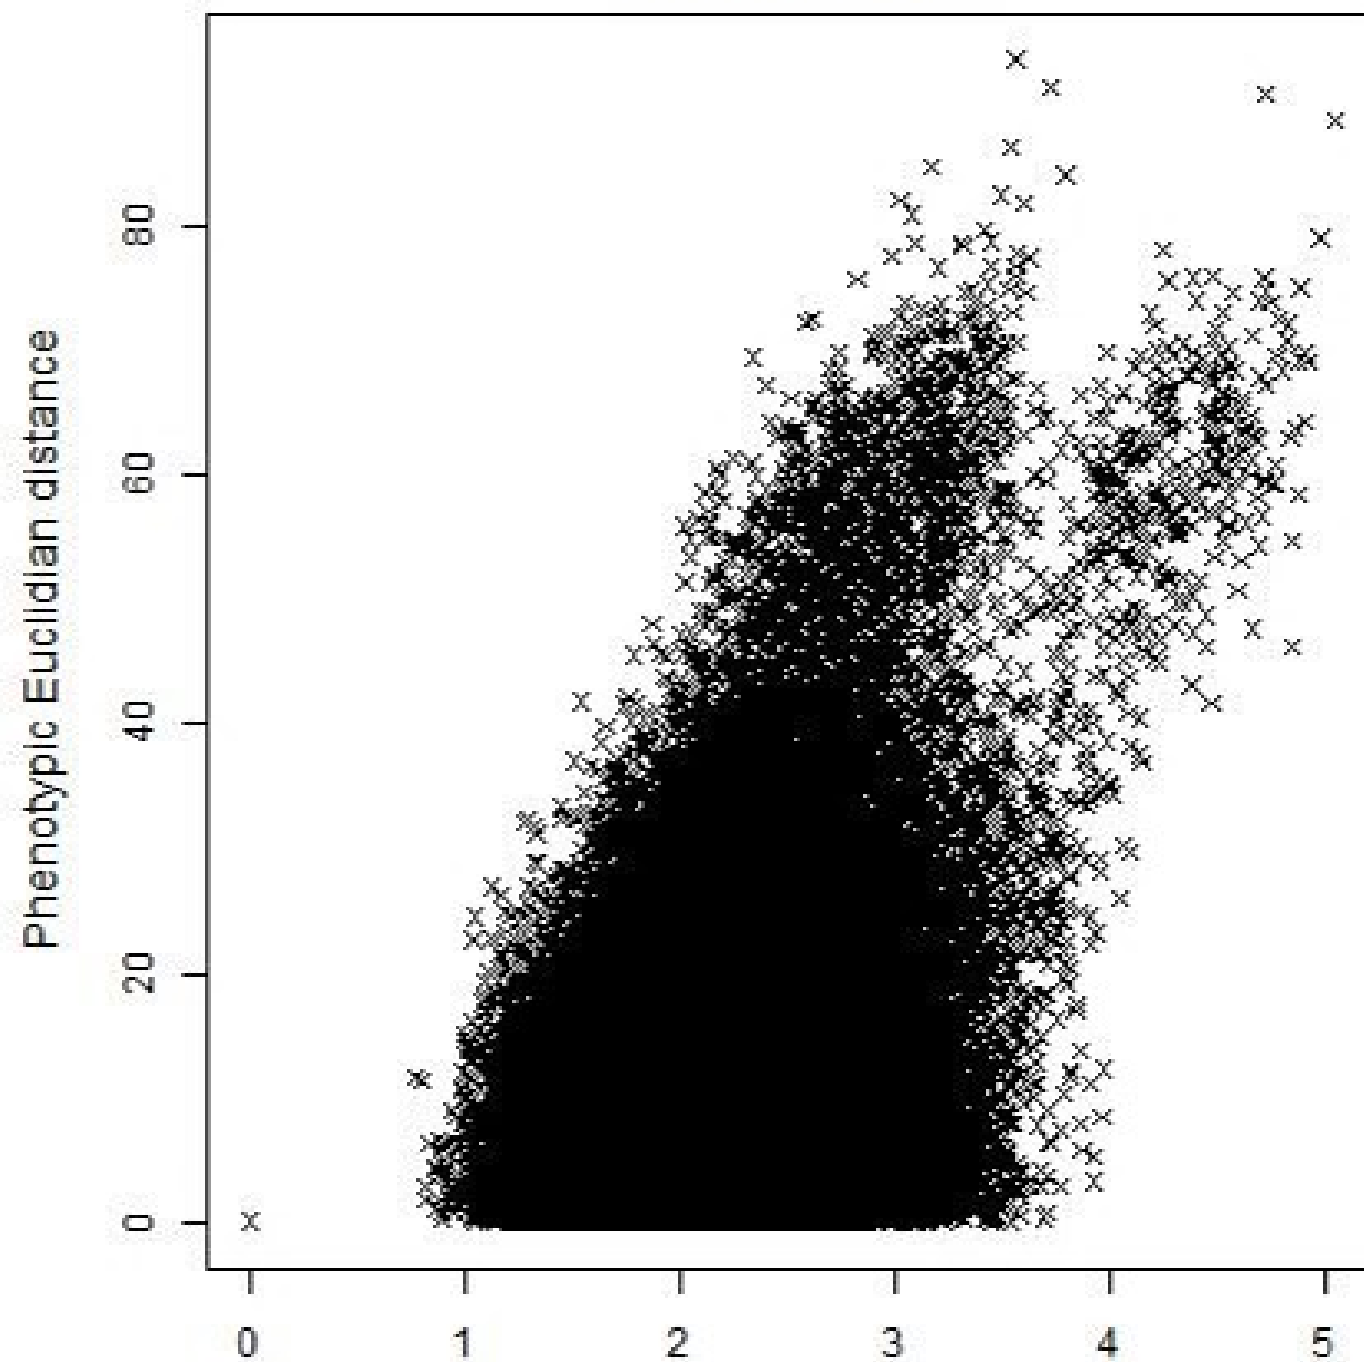

Genetic Euclidian distance (based on the 100 most significantly associated SNPs)

# CHs500\_me16

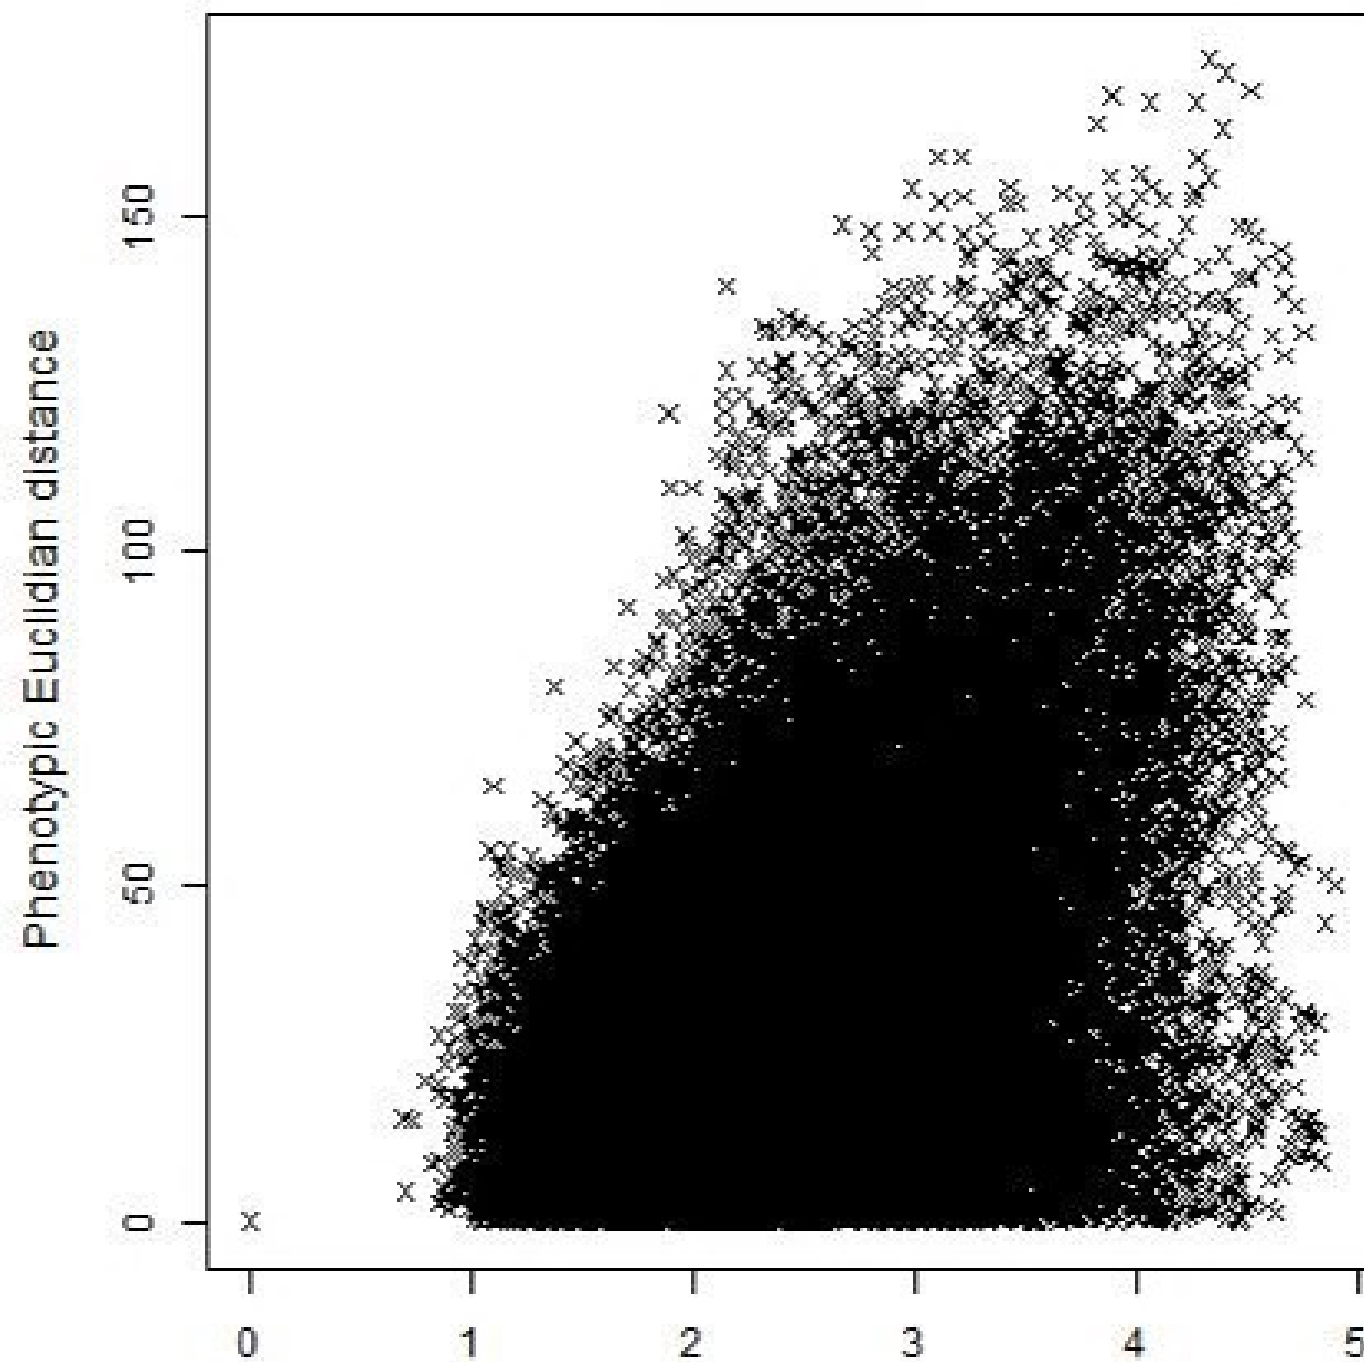

Genetic Euclidian distance (based on the 100 most significantly associated SNPs)

# CHs500\_me17

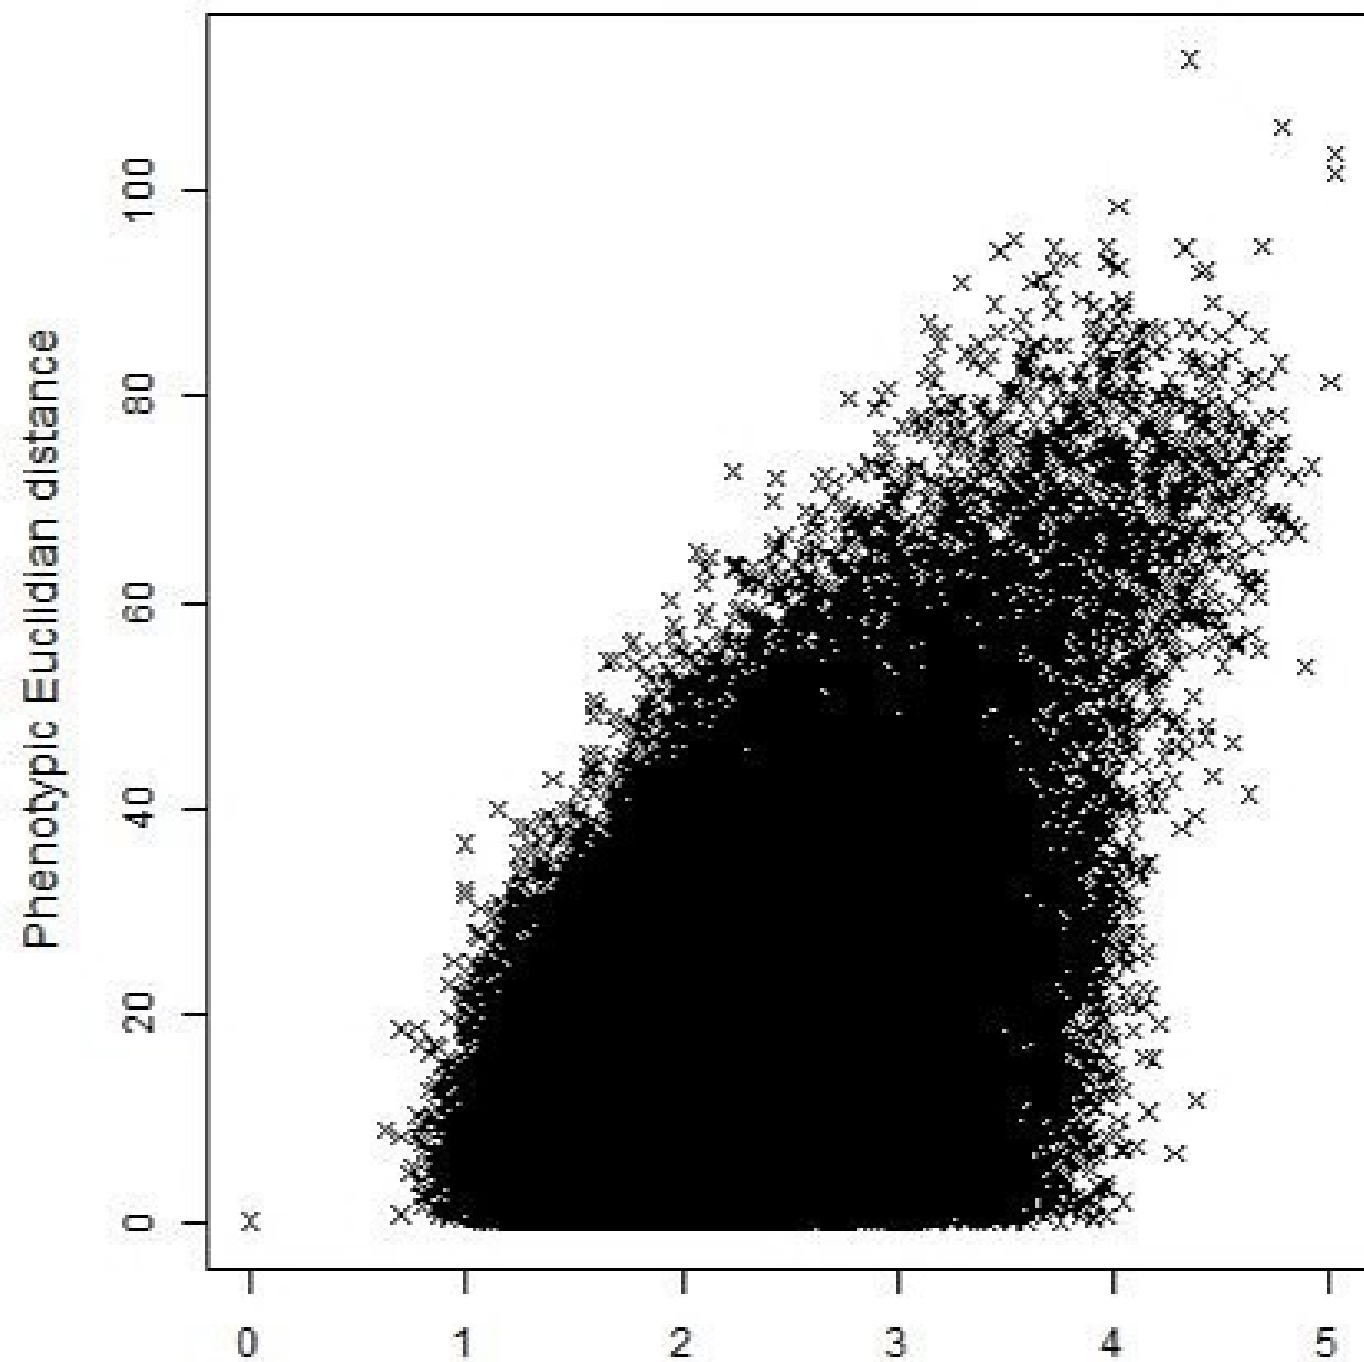

Genetic Euclidian distance (based on the 100 most significantly associated SNPs)

CHs500\_po17

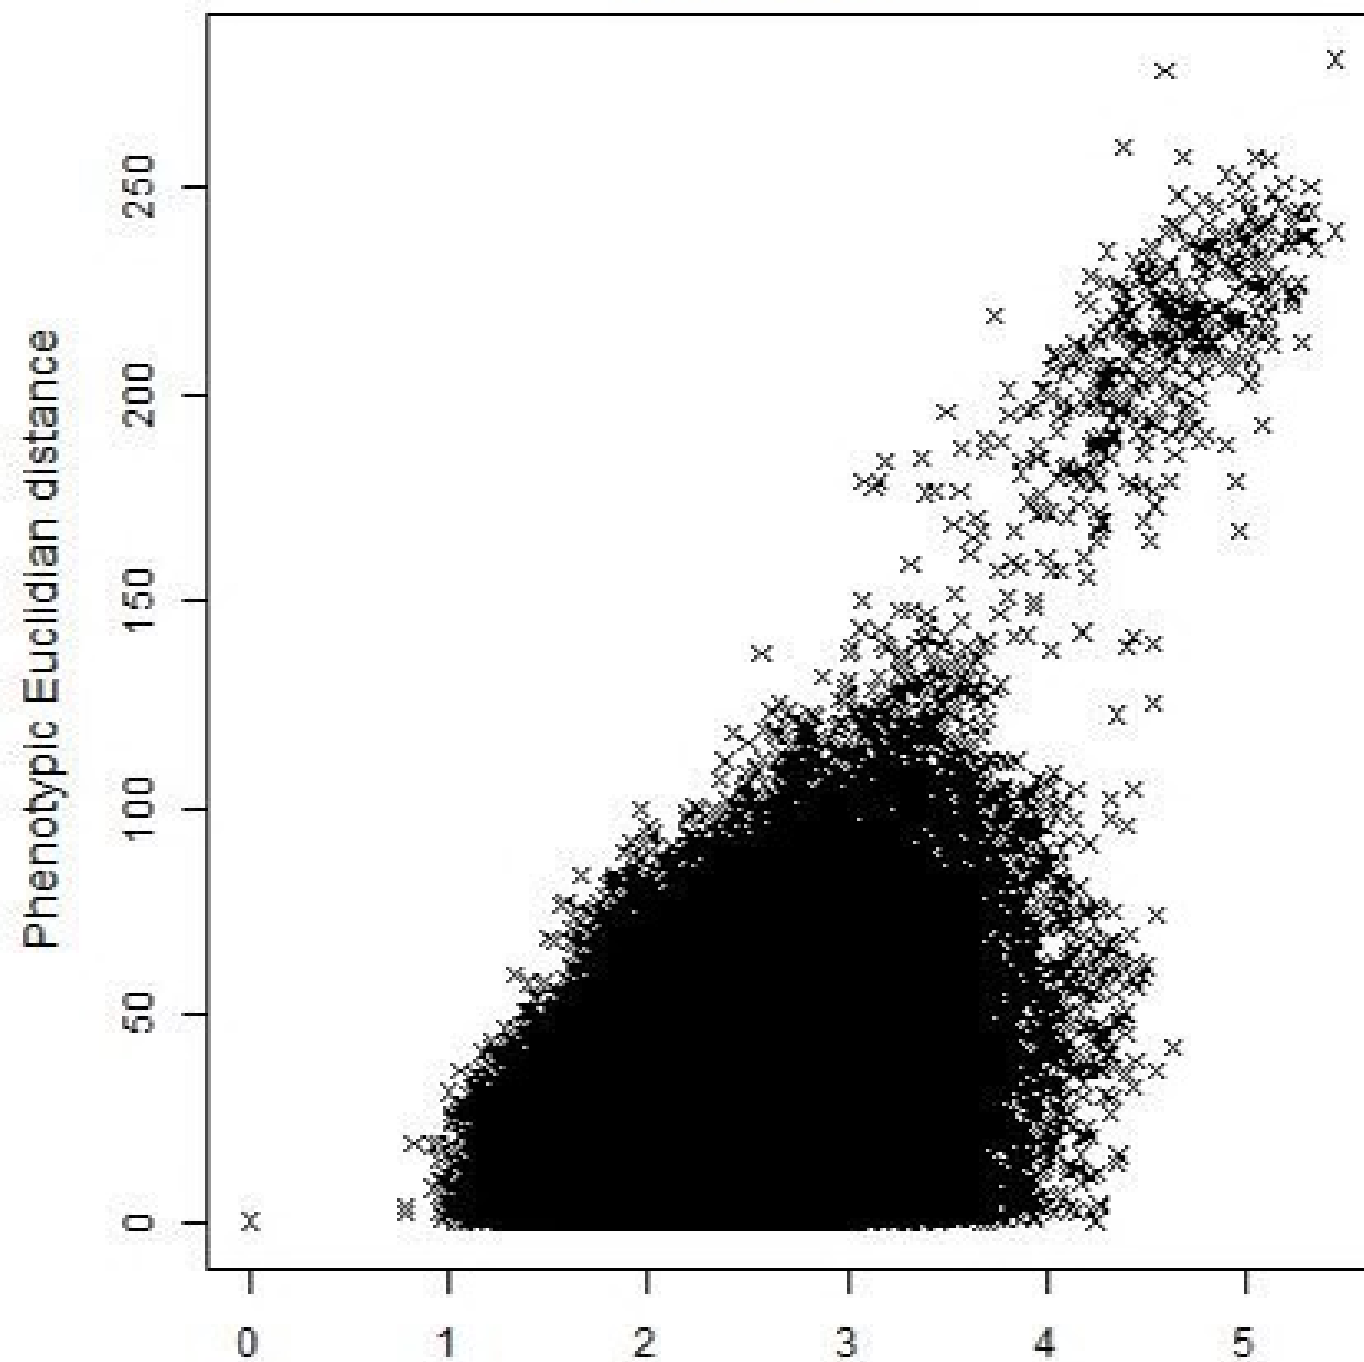

Genetic Euclidian distance (based on the 100 most significantly associated SNPs)

DES\_po15

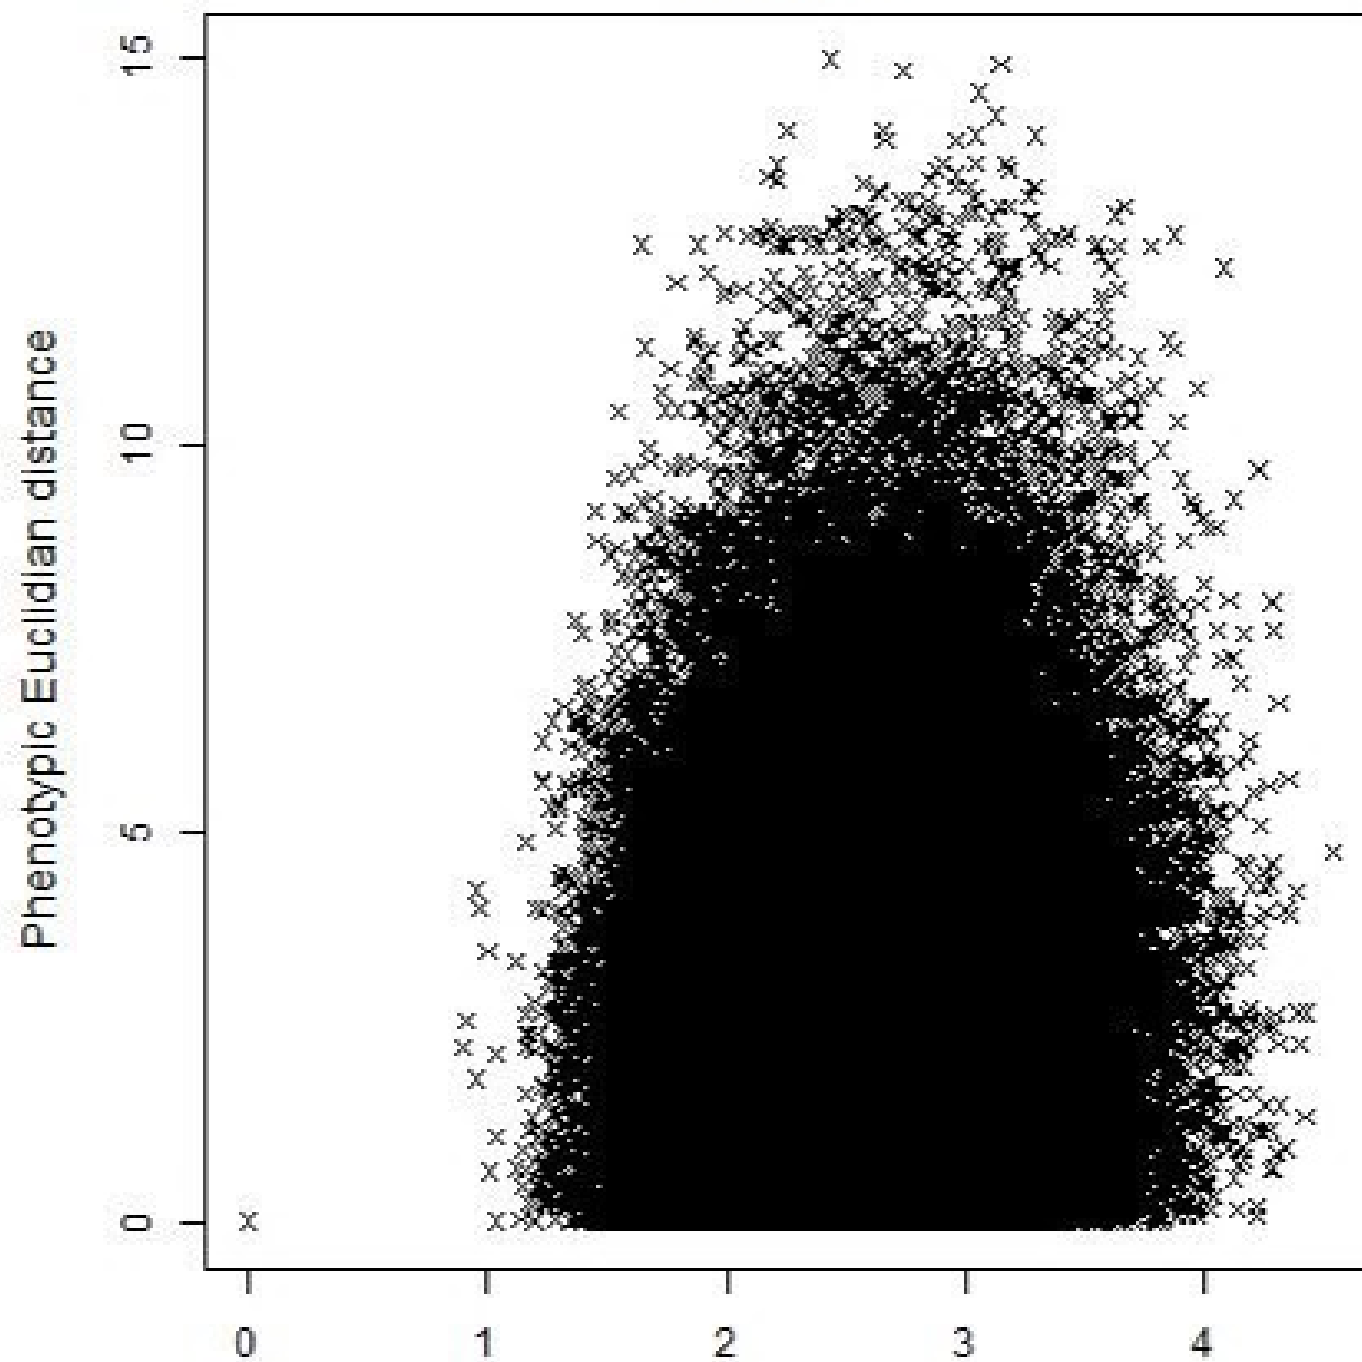

Genetic Euclidian distance (based on the 100 most significantly associated SNPs)

# DHE\_01\_lu17

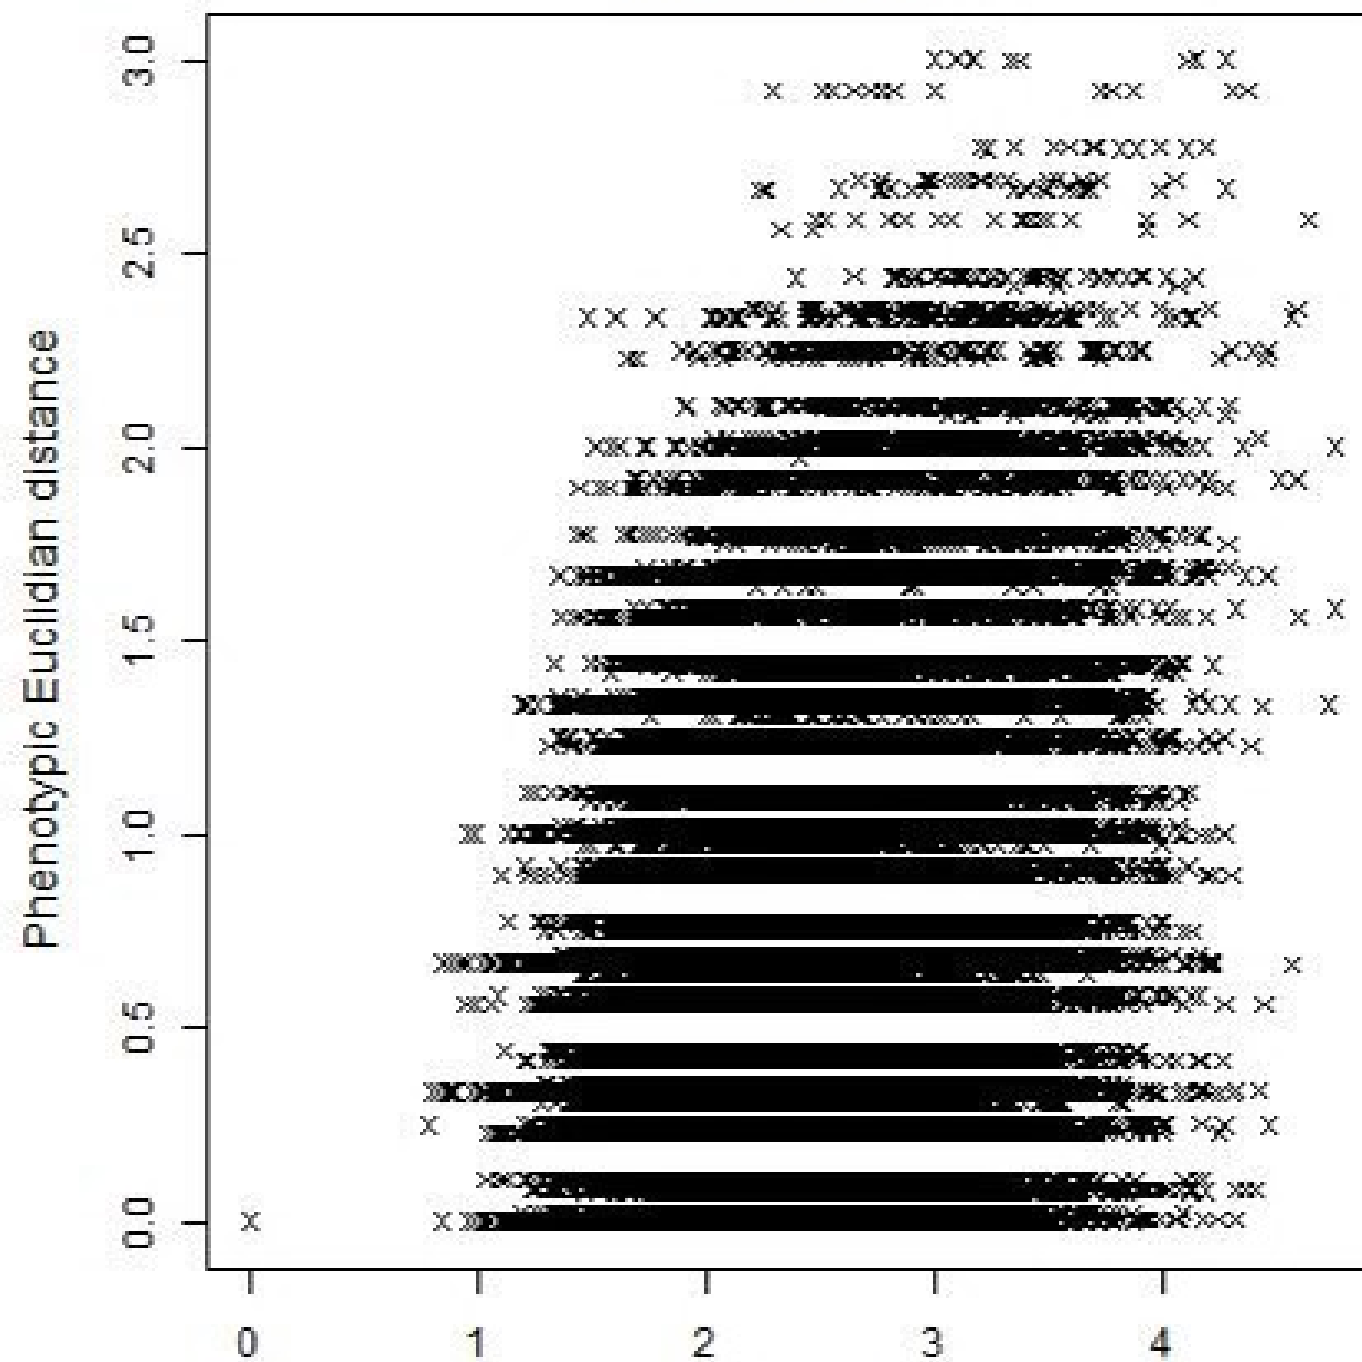

Genetic Euclidian distance (based on the 100 most significantly associated SNPs)

DHE\_04\_lu17

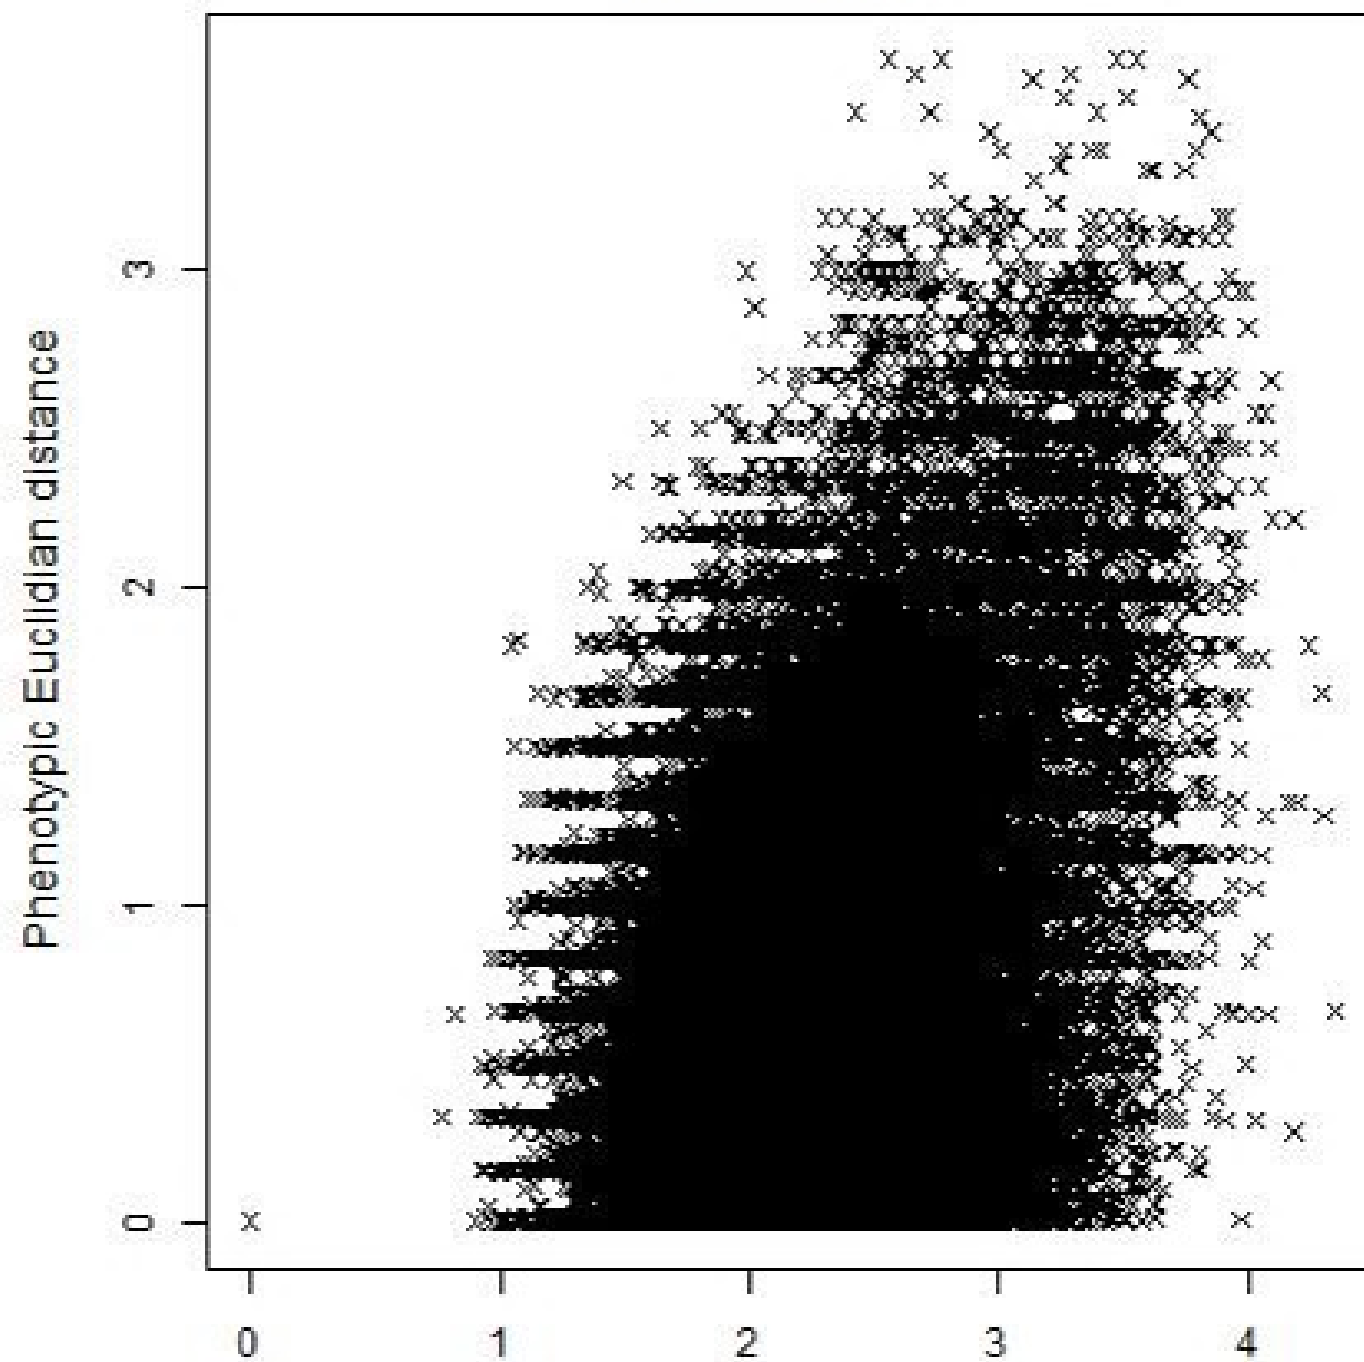

Genetic Euclidian distance (based on the 100 most significantly associated SNPs)



DHE\_07\_lu16

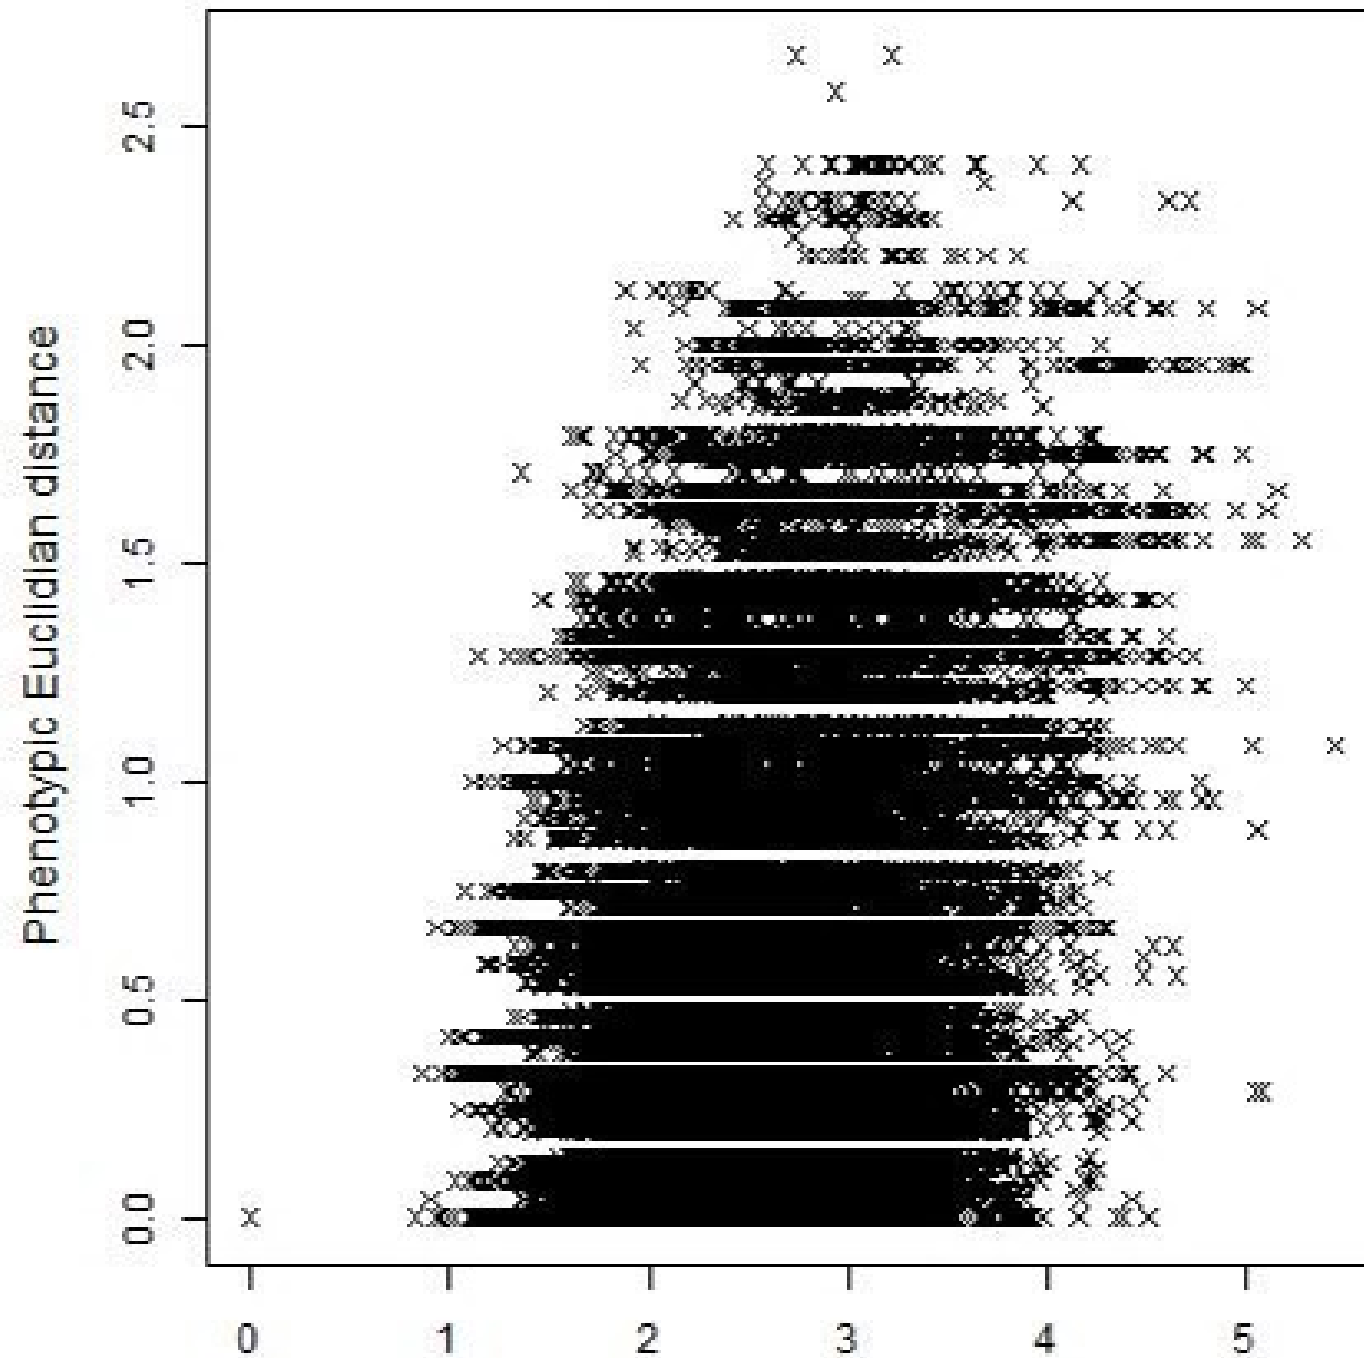

Genetic Euclidian distance (based on the 100 most significantly associated SNPs)

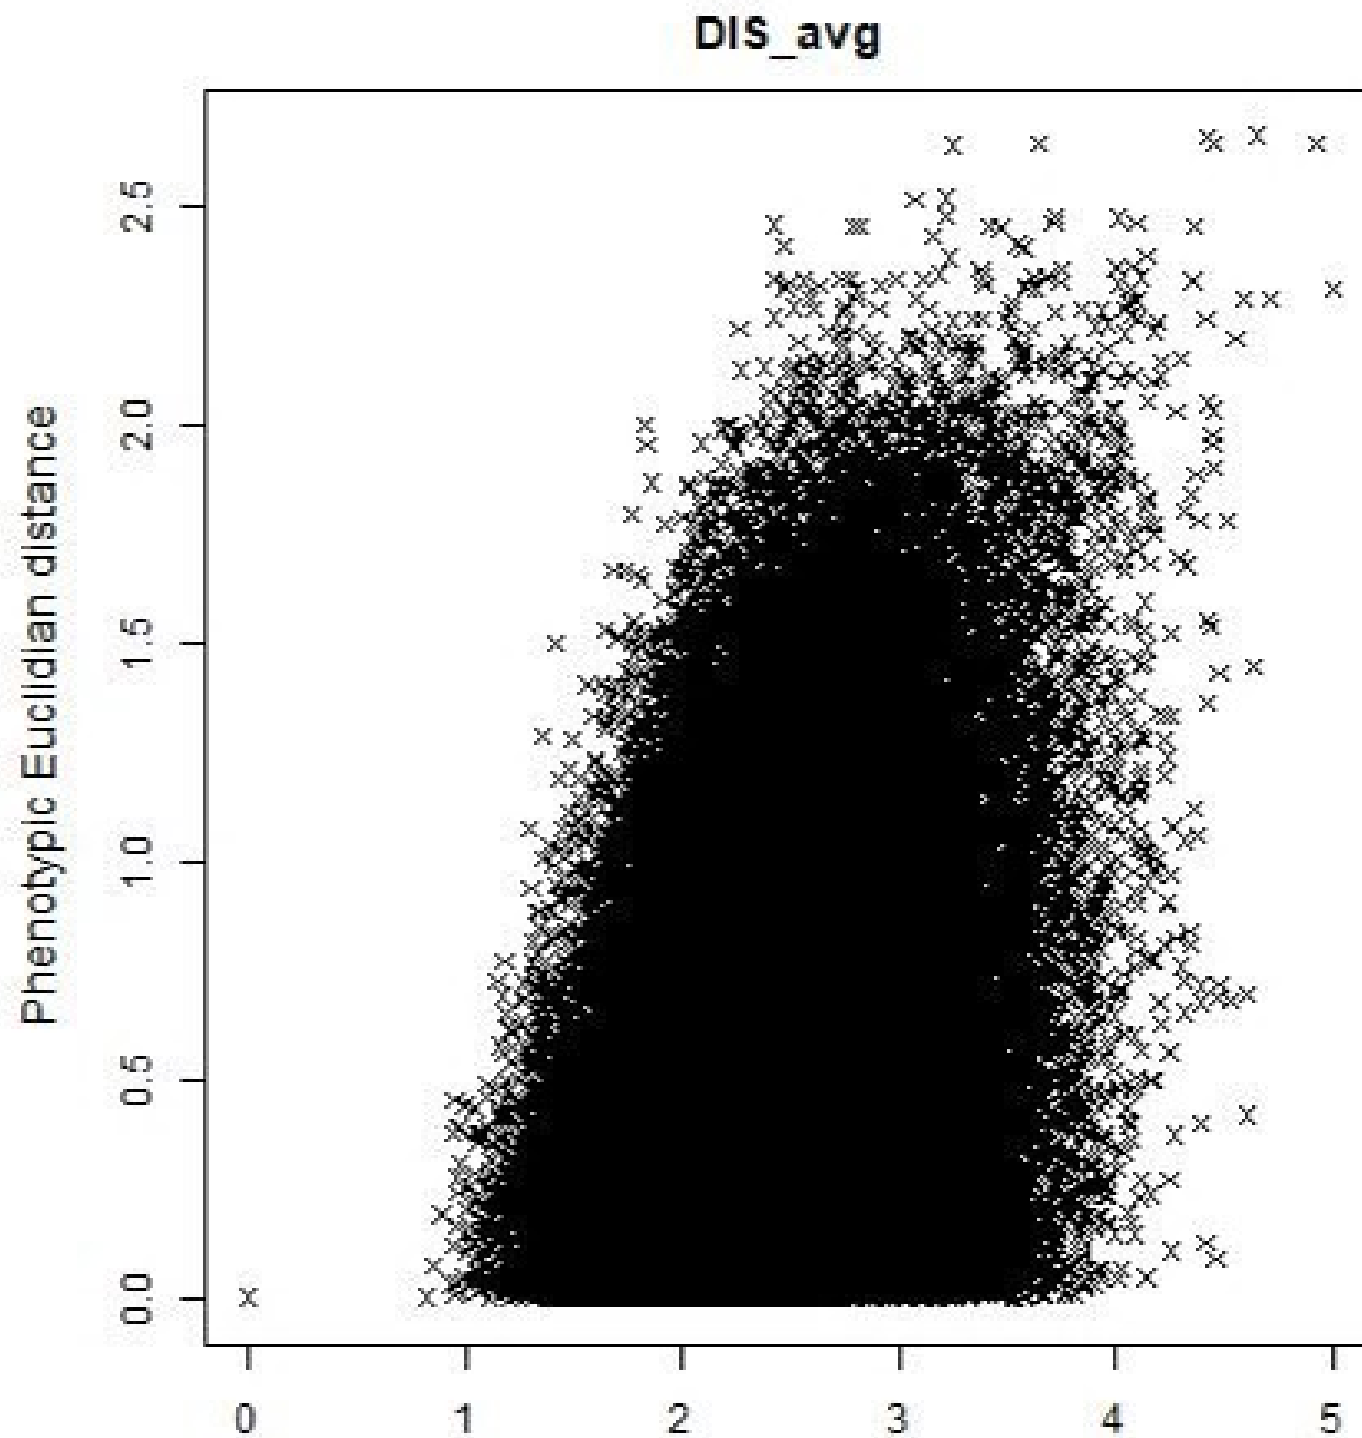

Genetic Euclidian distance (based on the 100 most significantly associated SNPs)

DIS\_lu15

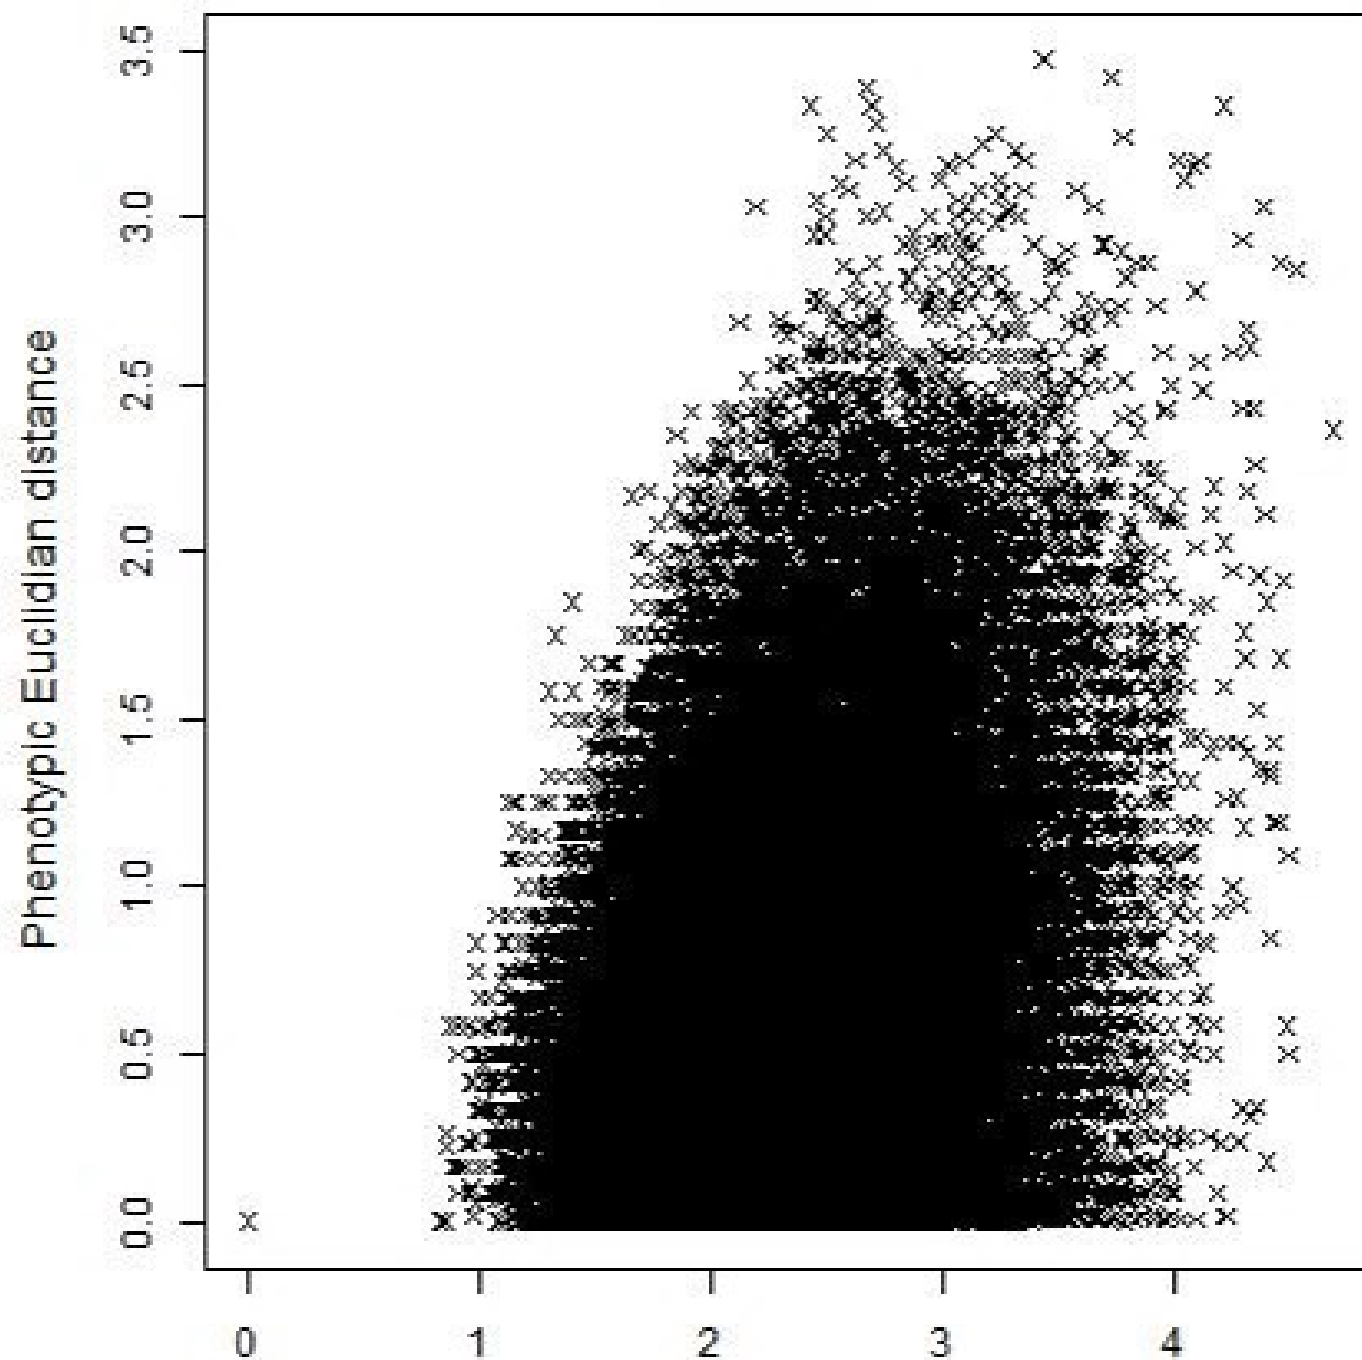

Genetic Euclidian distance (based on the 100 most significantly associated SNPs)

DIS\_lu16

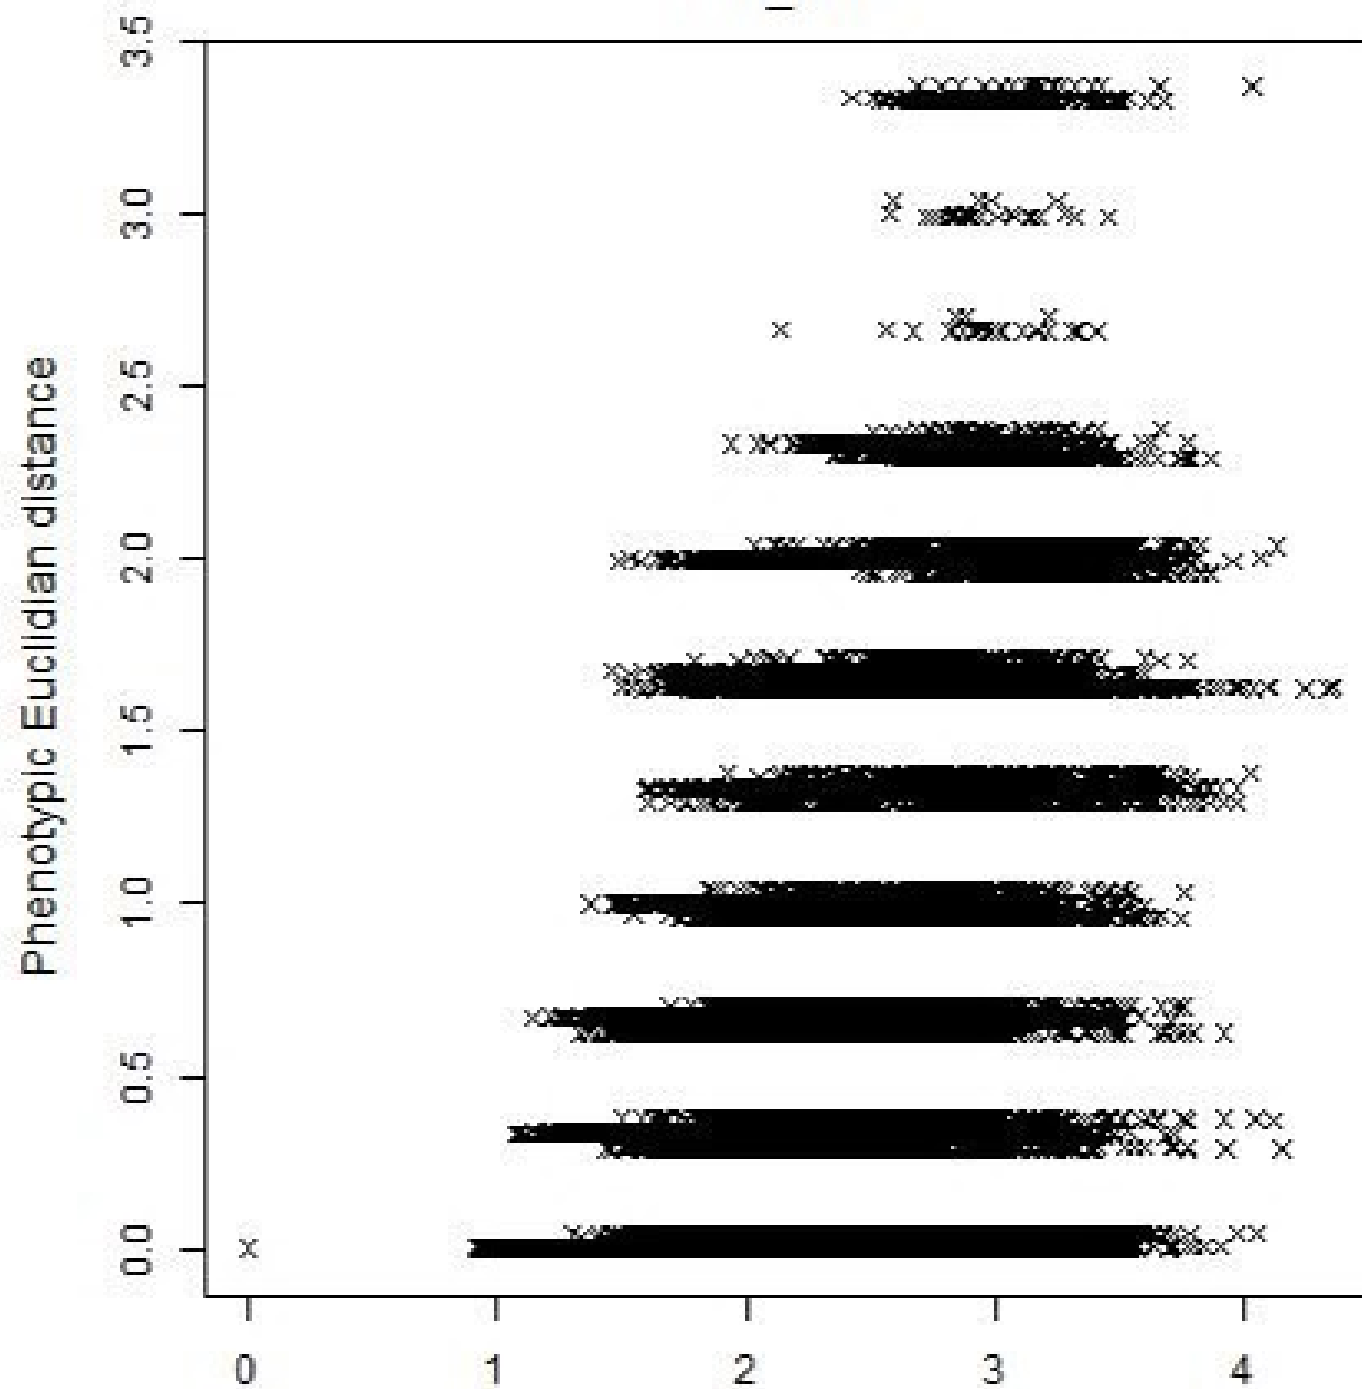

Genetic Euclidian distance (based on the 100 most significantly associated SNPs)

DIS\_lu17

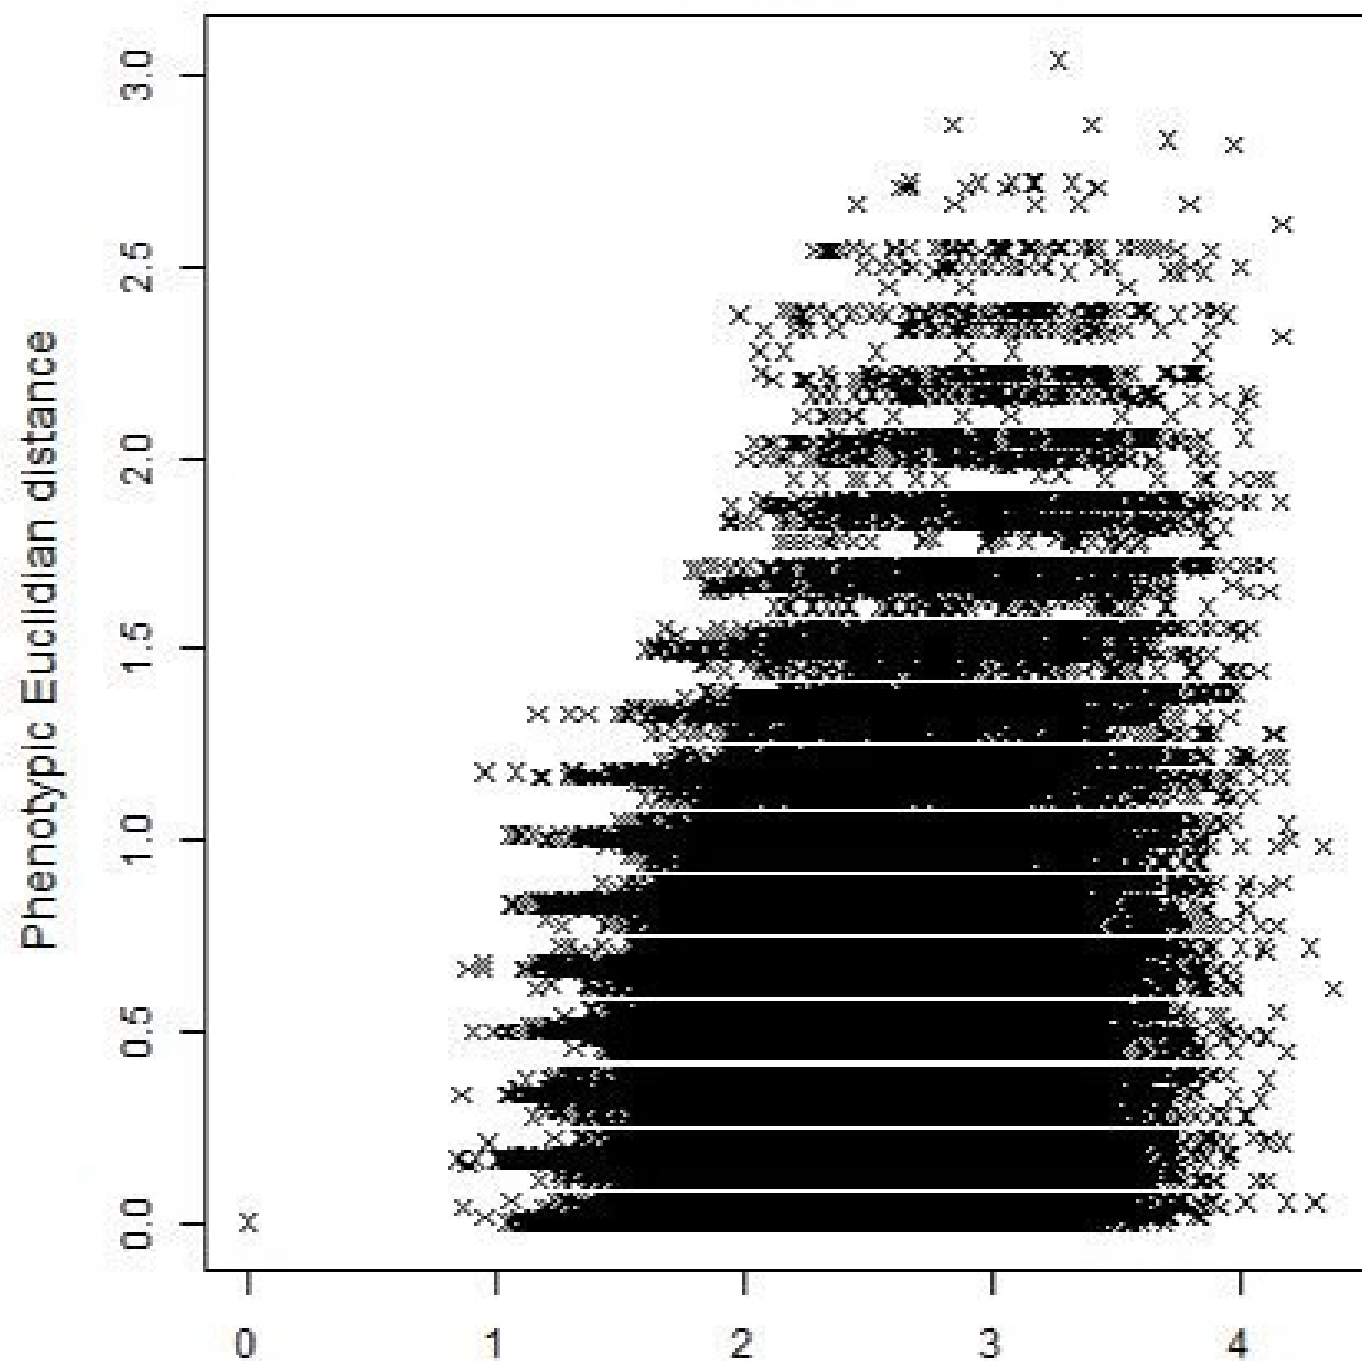

Genetic Euclidian distance (based on the 100 most significantly associated SNPs)

DIS\_me16

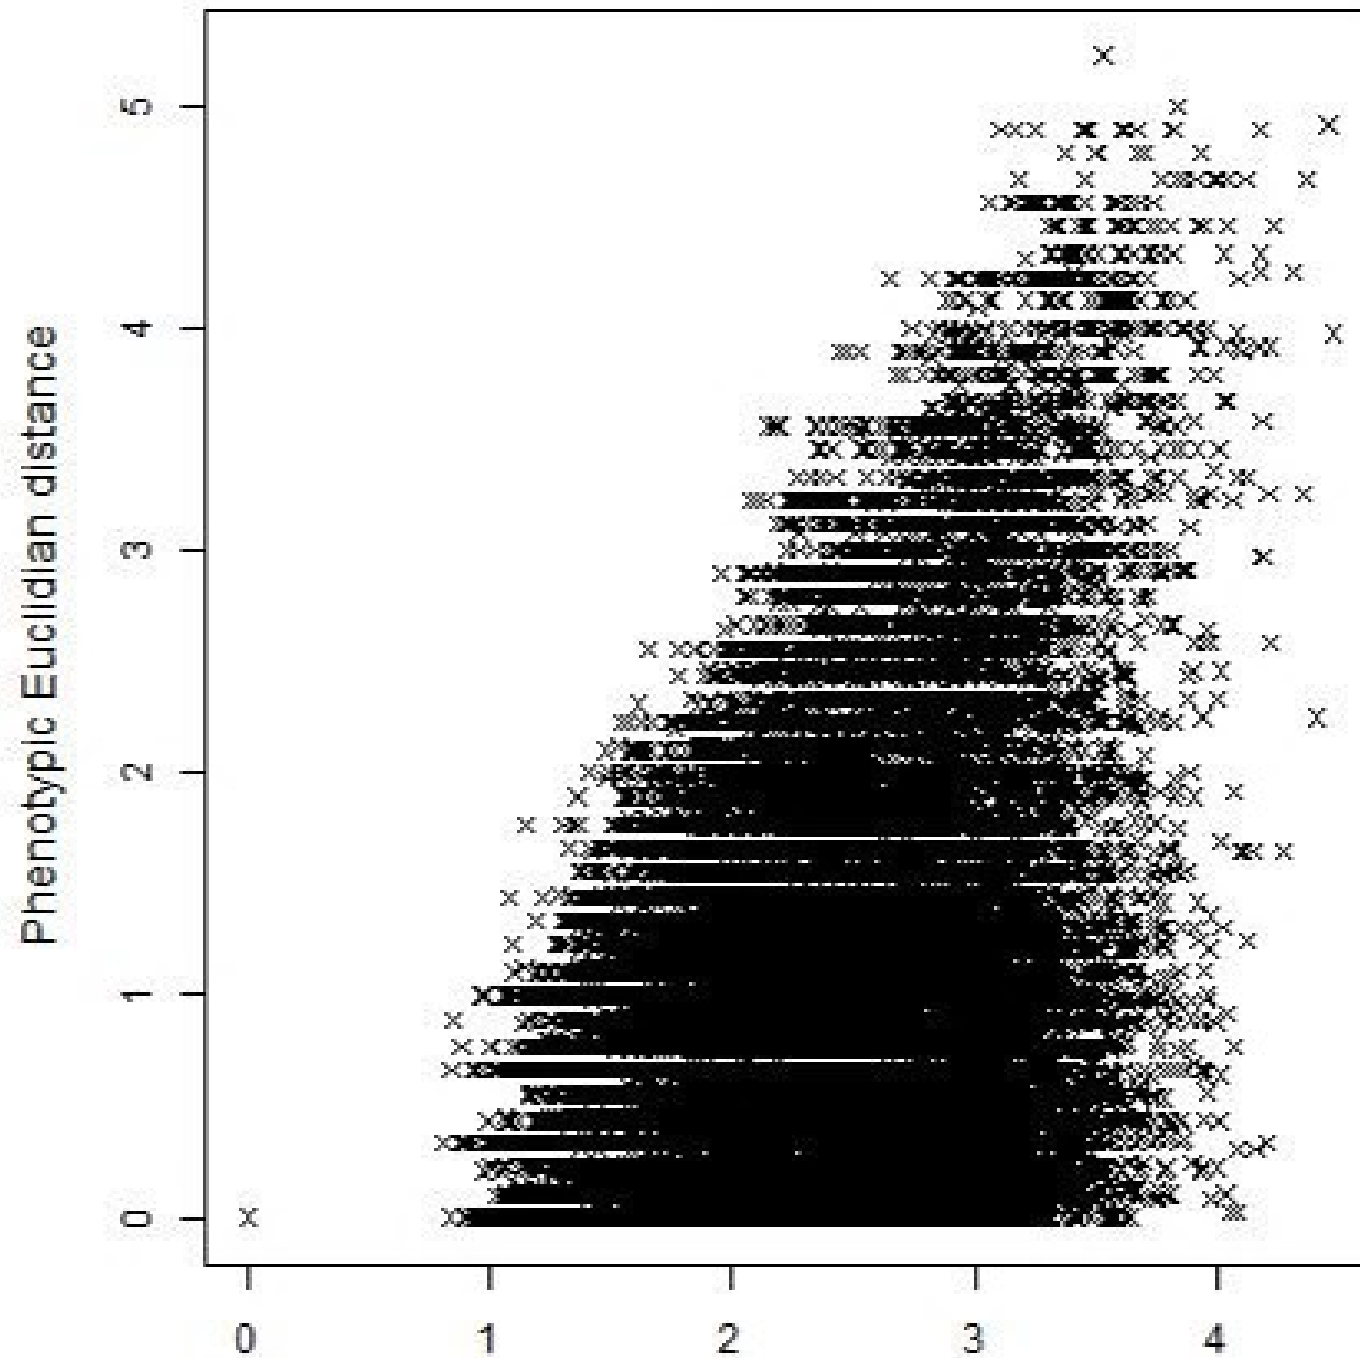

Genetic Euclidian distance (based on the 100 most significantly associated SNPs)

DIS\_me17

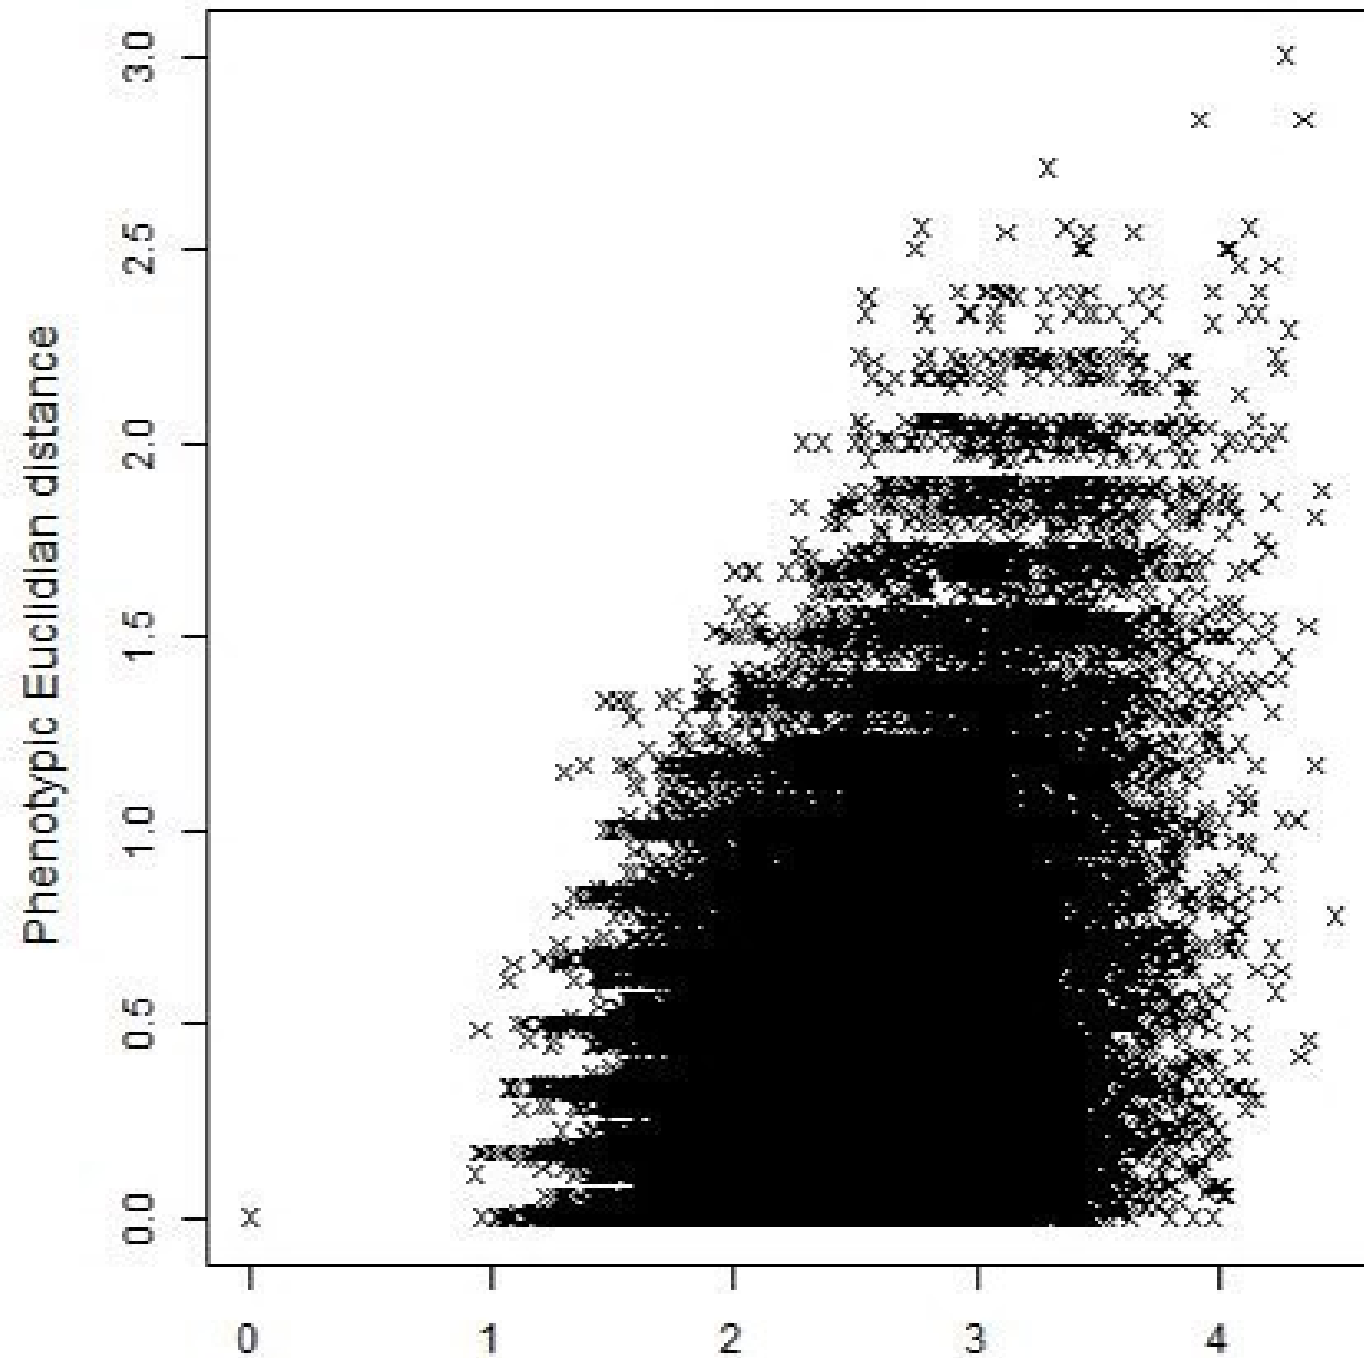

Genetic Euclidian distance (based on the 100 most significantly associated SNPs)

DIS\_po15

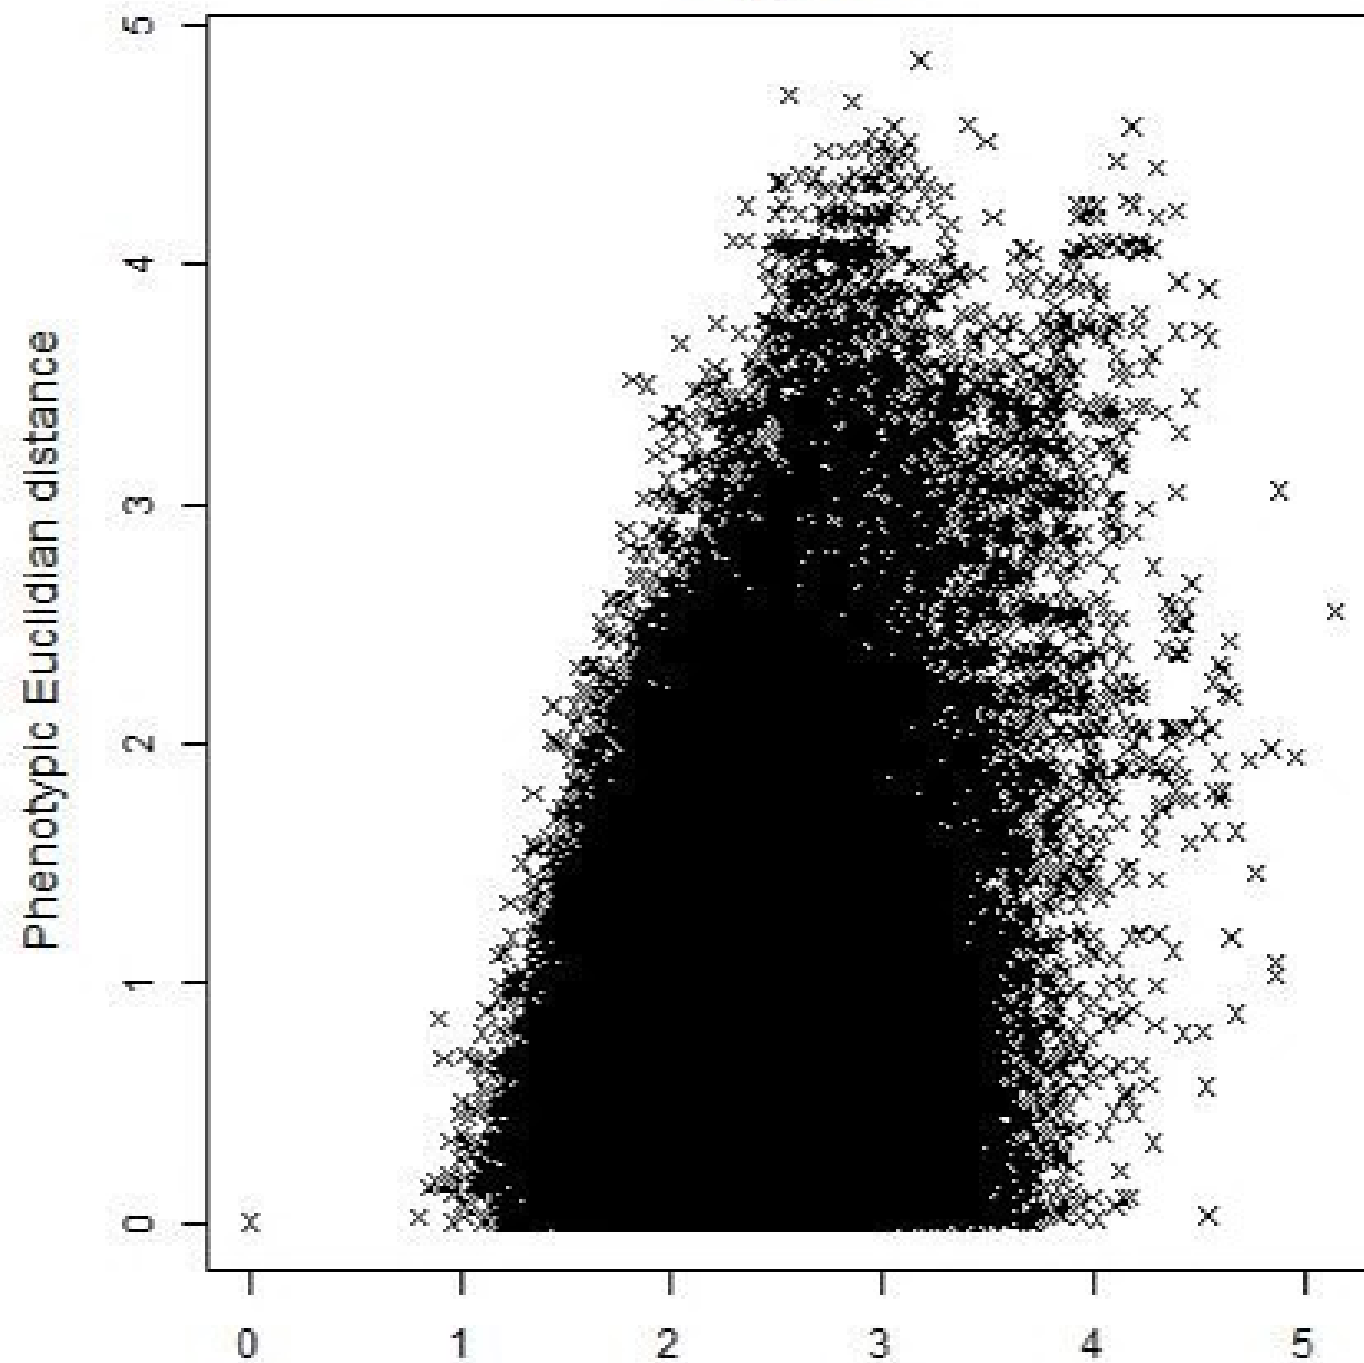

Genetic Euclidian distance (based on the 100 most significantly associated SNPs)



DIS\_po17

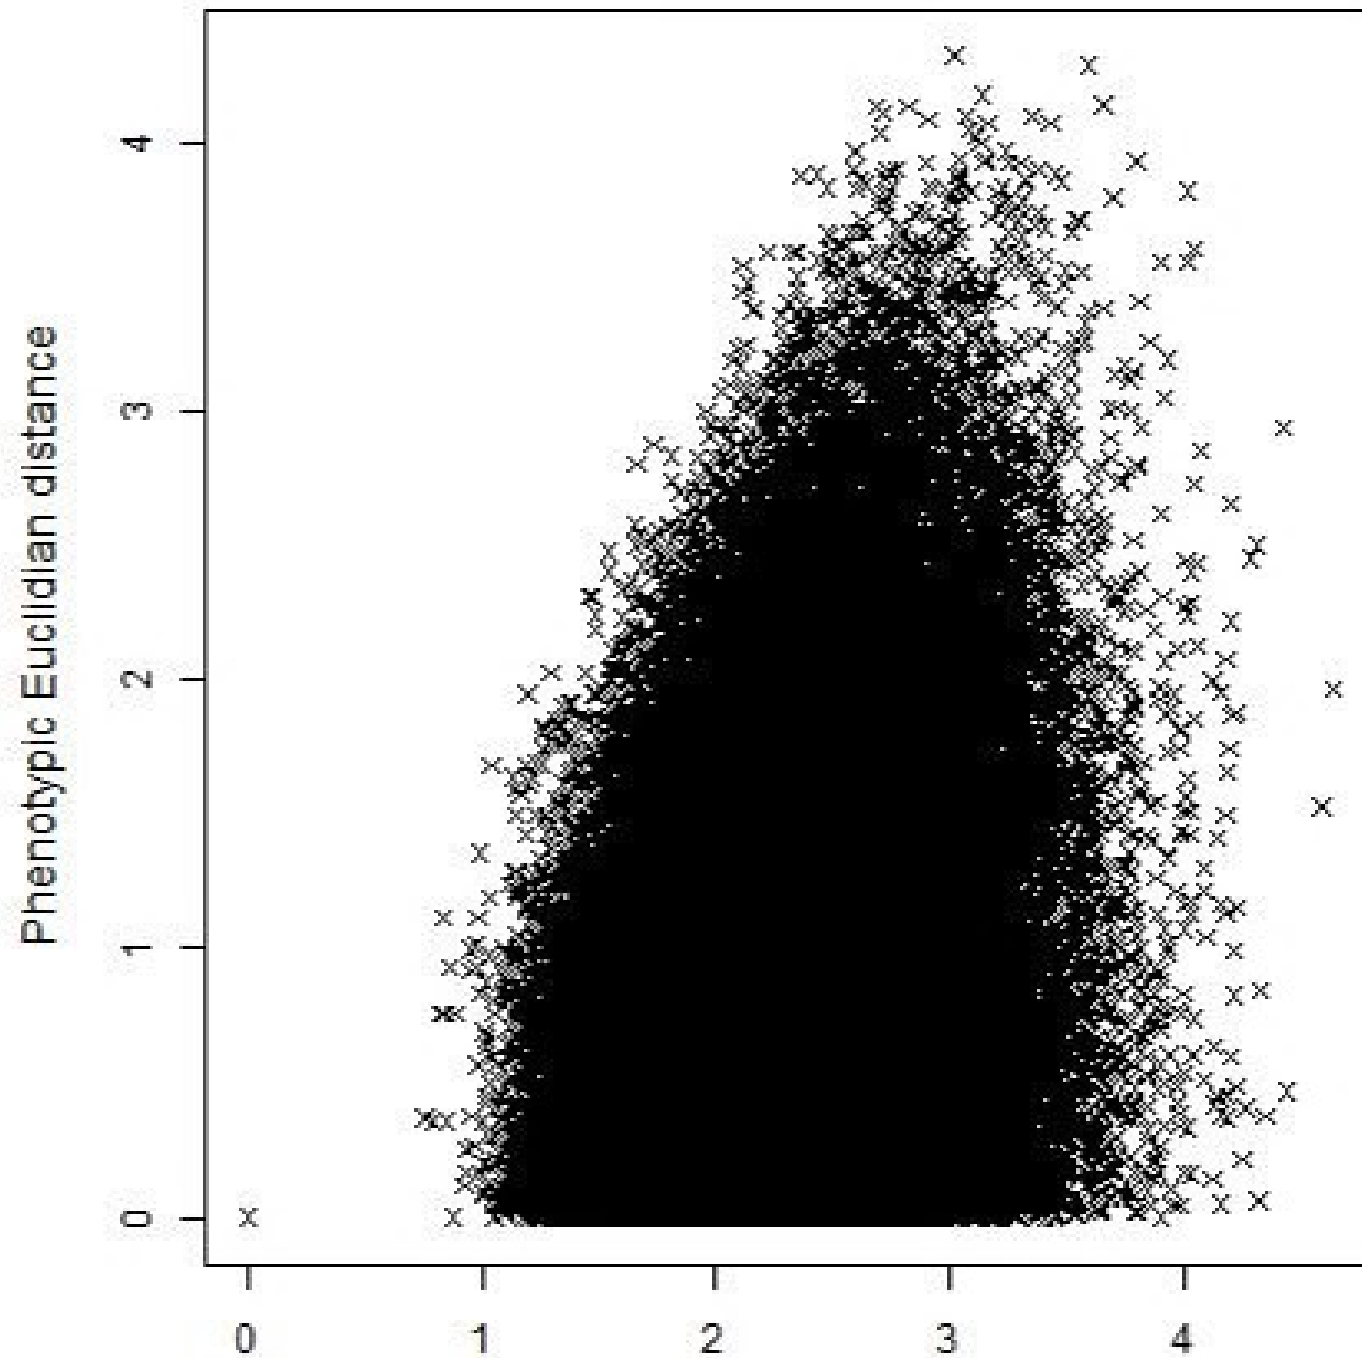

Genetic Euclidian distance (based on the 100 most significantly associated SNPs)

DNDF\_04\_me17

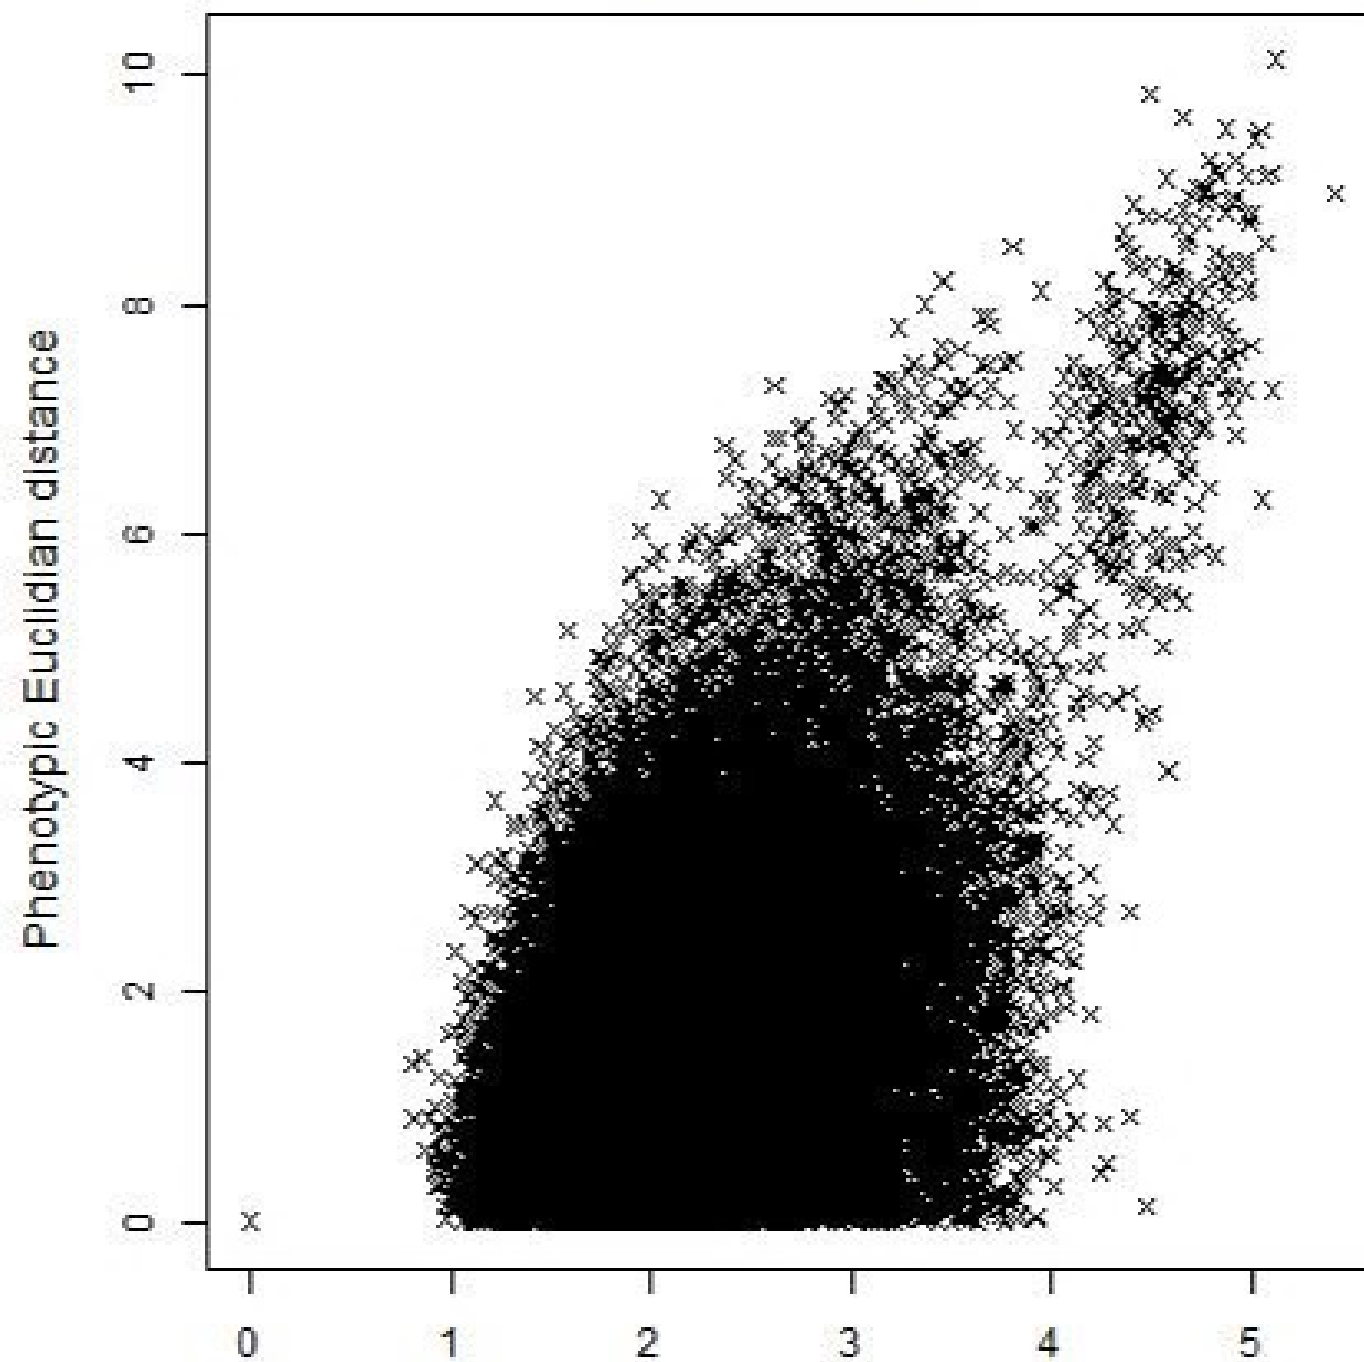

Genetic Euclidian distance (based on the 100 most significantly associated SNPs)

DNDF\_10\_me17

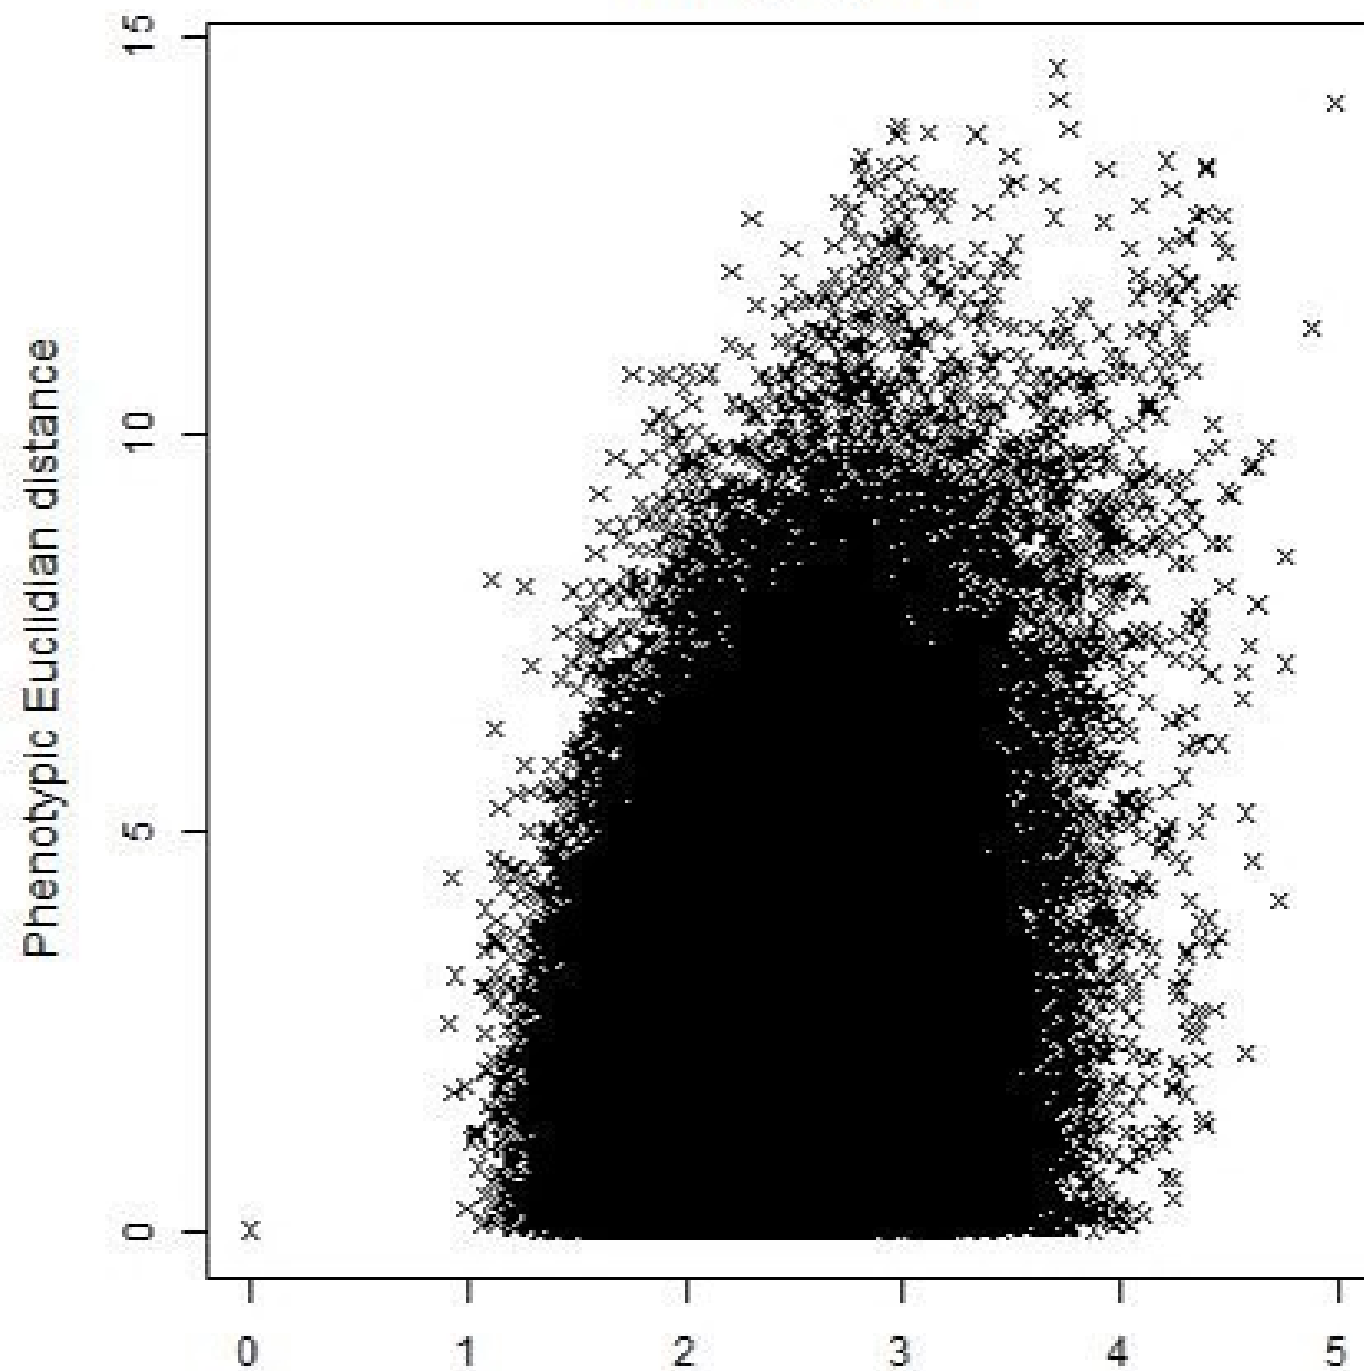

Genetic Euclidian distance (based on the 100 most significantly associated SNPs)

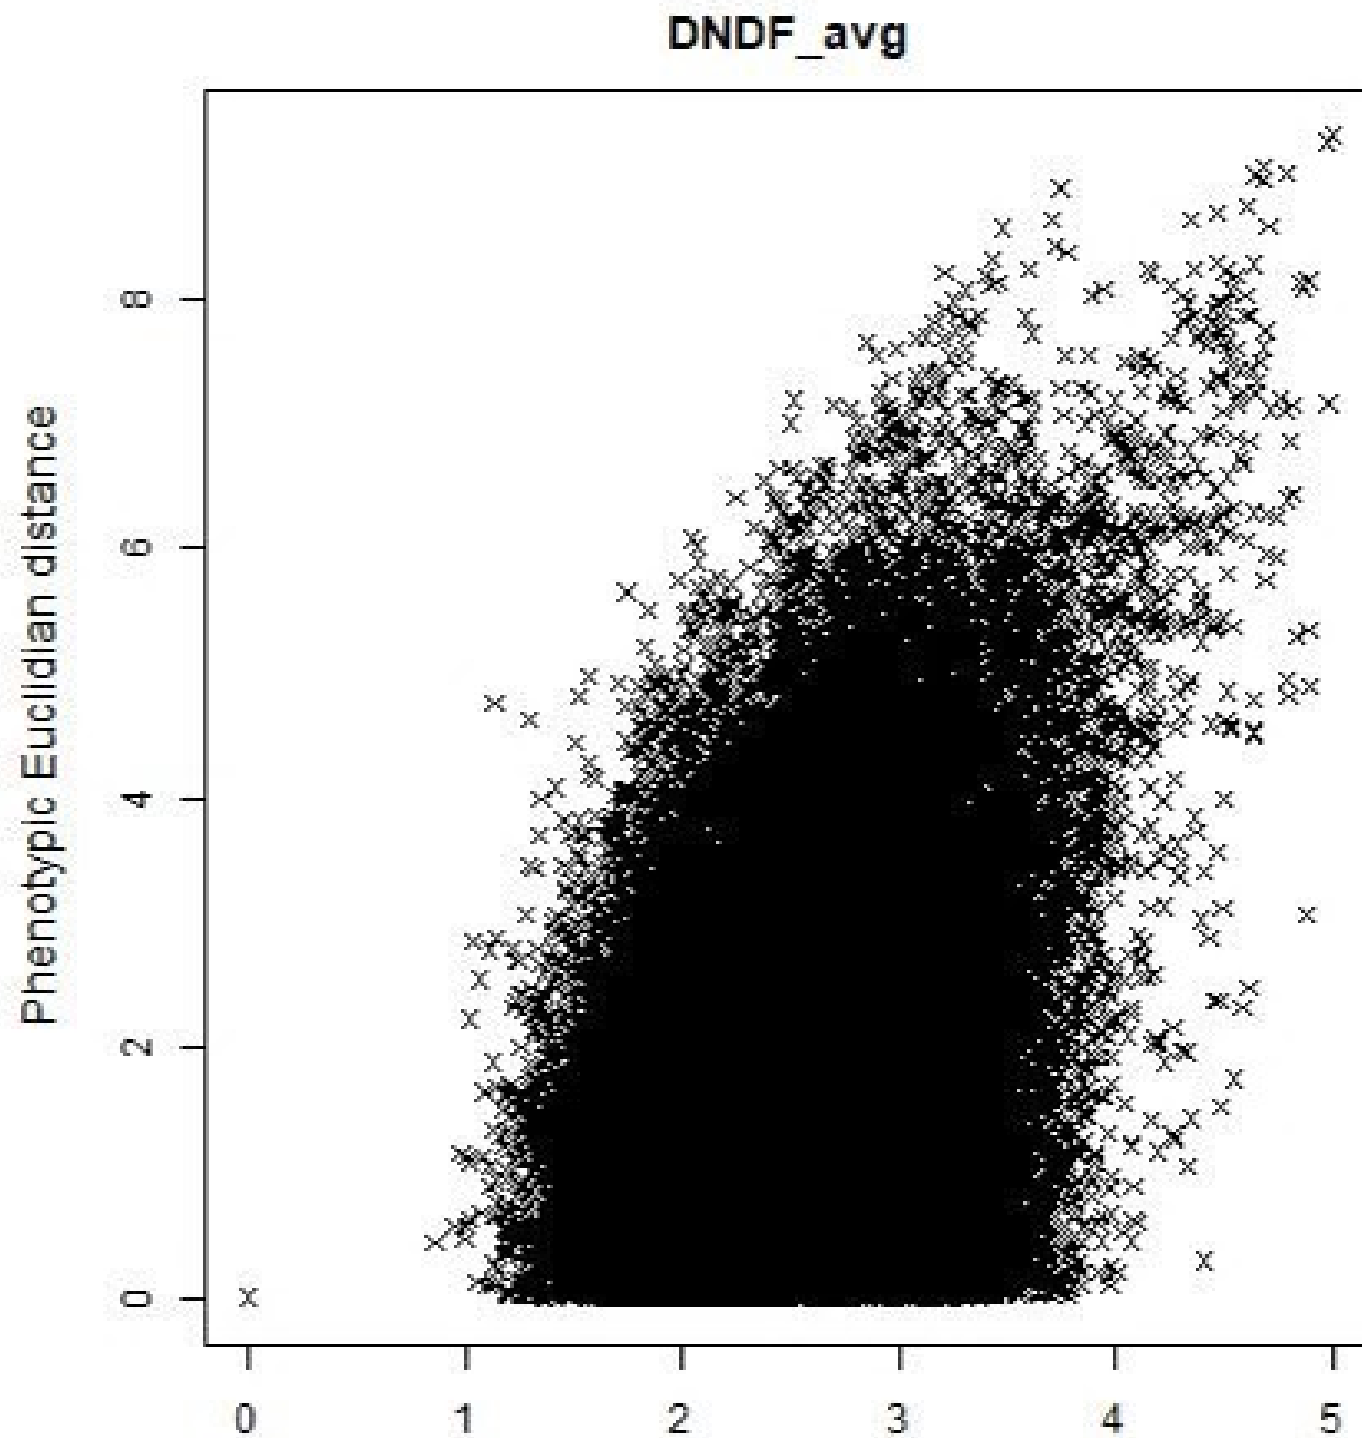

Genetic Euclidian distance (based on the 100 most significantly associated SNPs)

# DRB\_lu1516

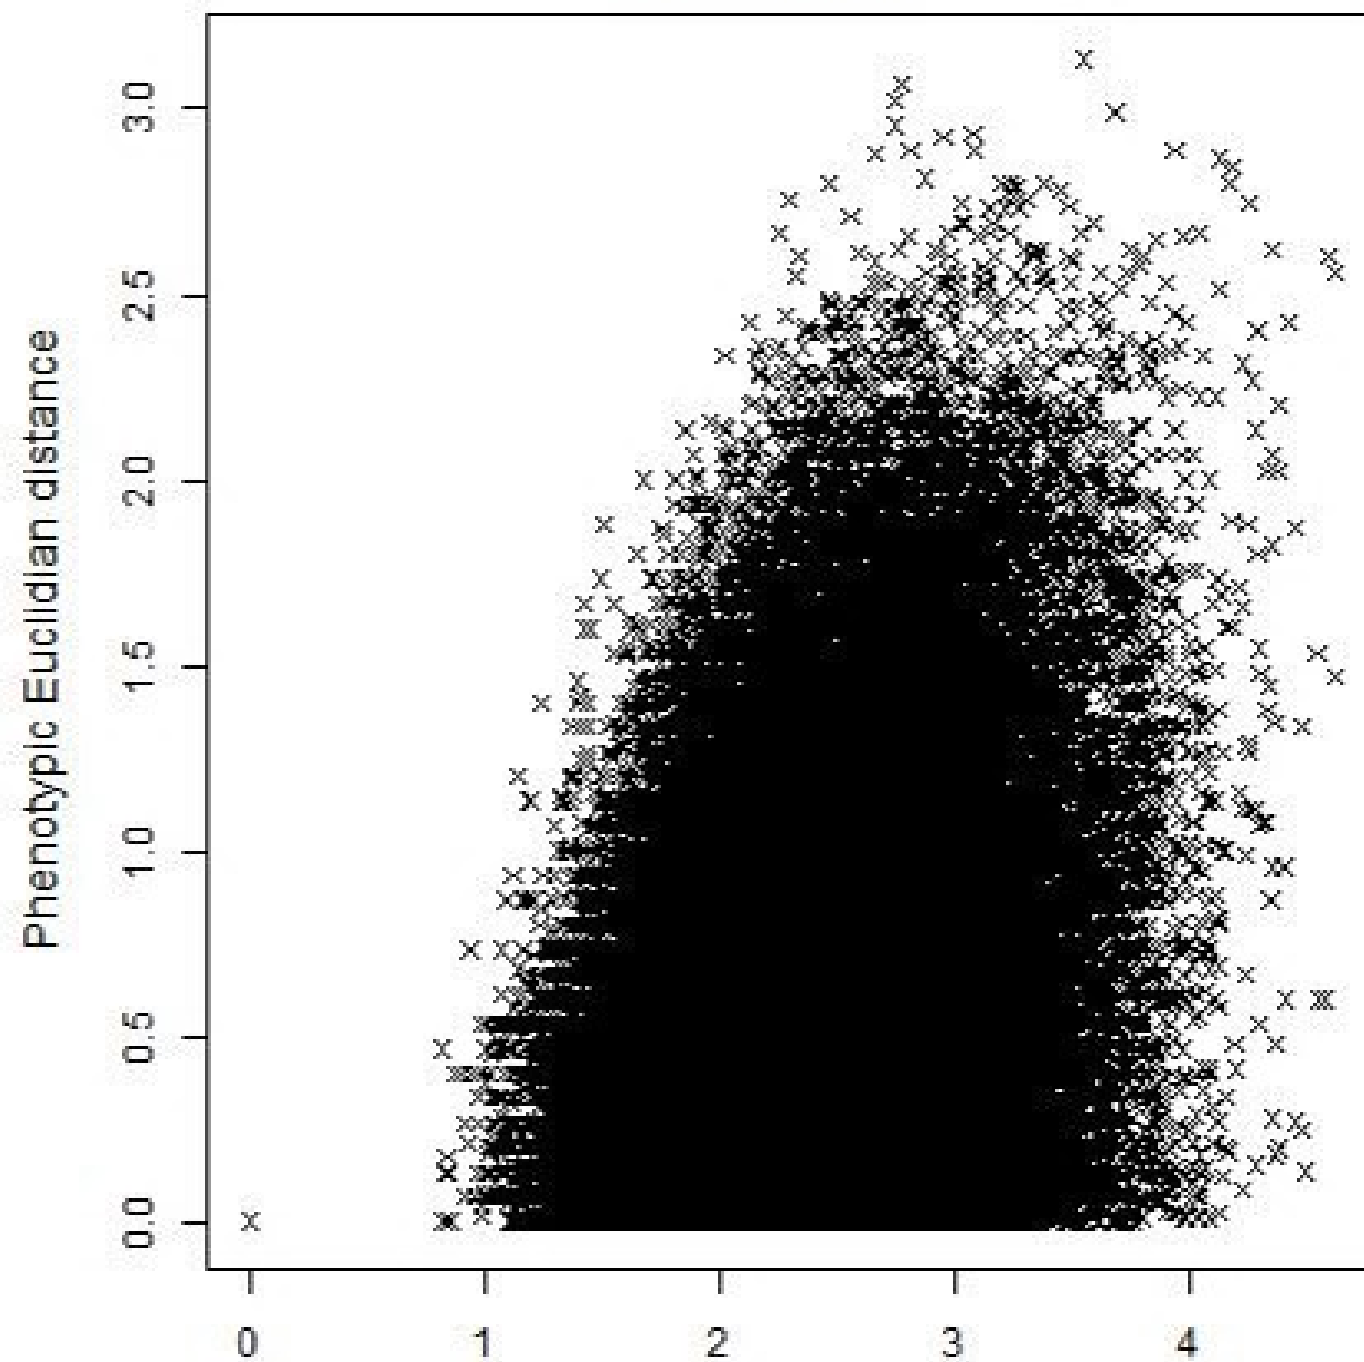

Genetic Euclidian distance (based on the 100 most significantly associated SNPs)

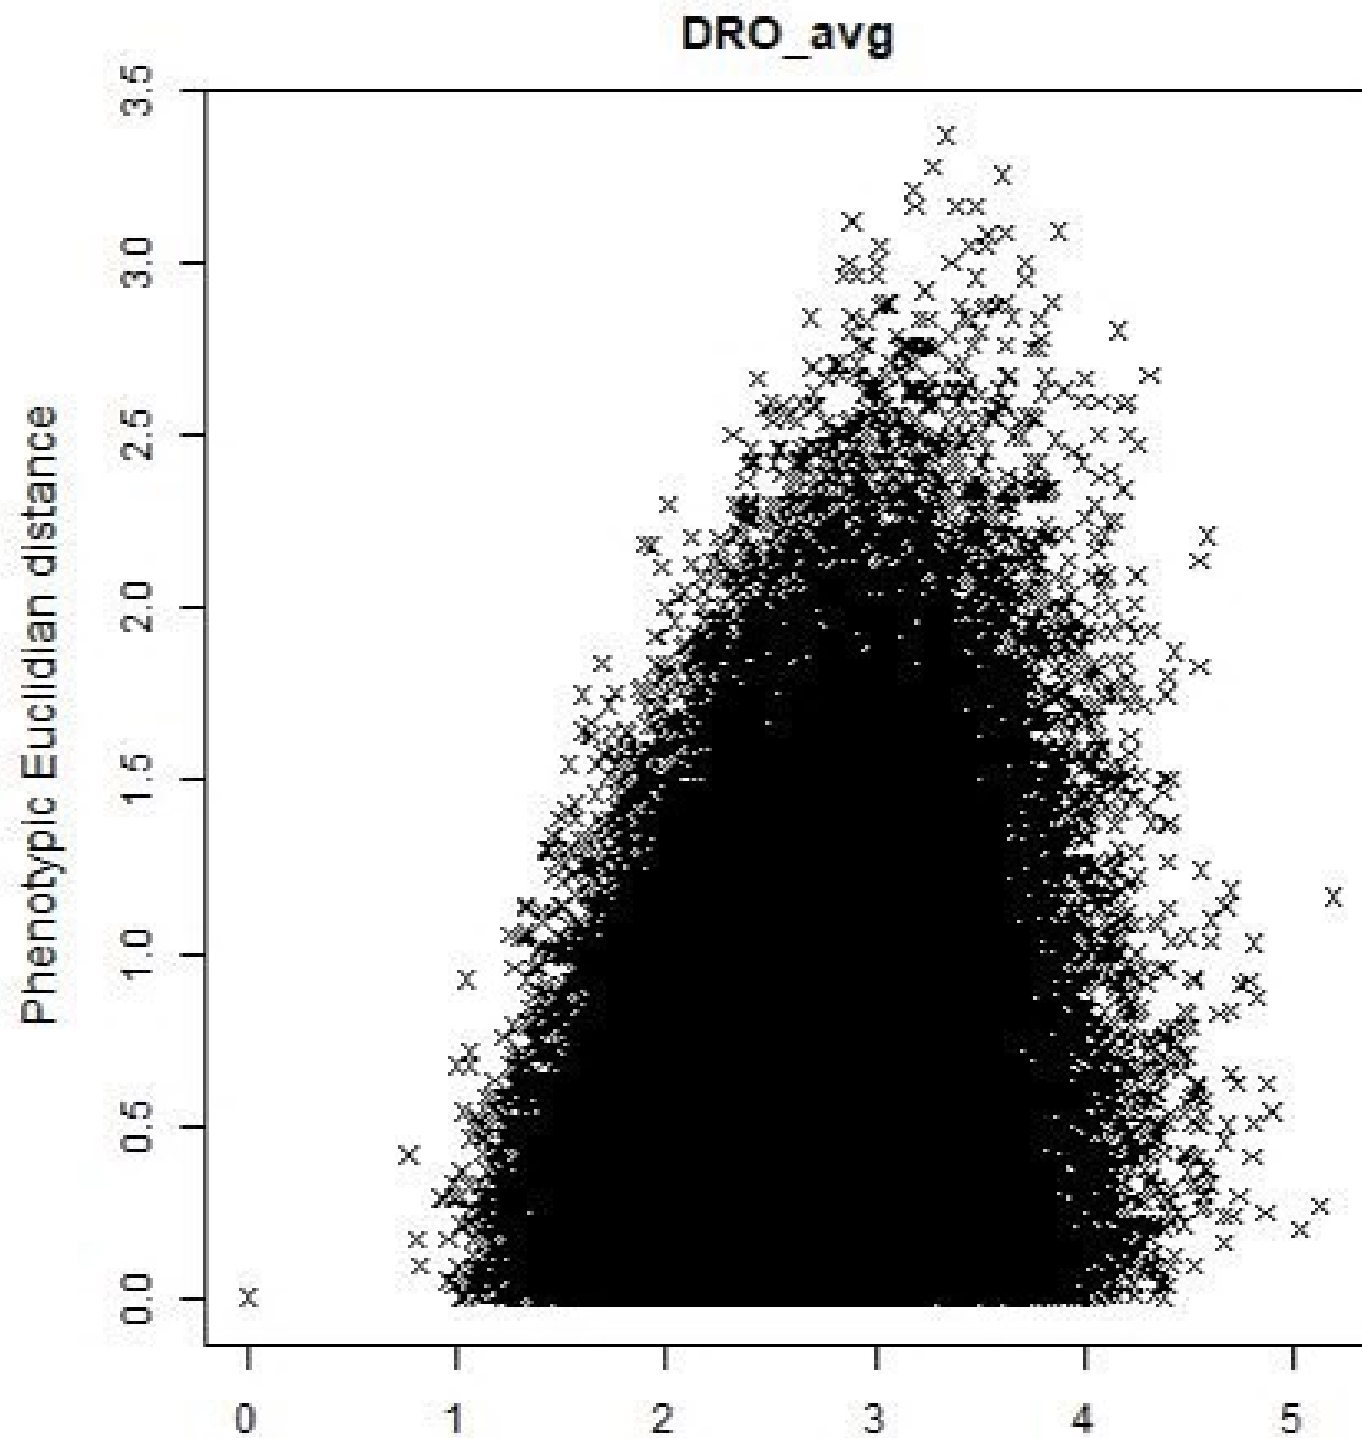

Genetic Euclidian distance (based on the 100 most significantly associated SNPs)

# DRO\_lu16

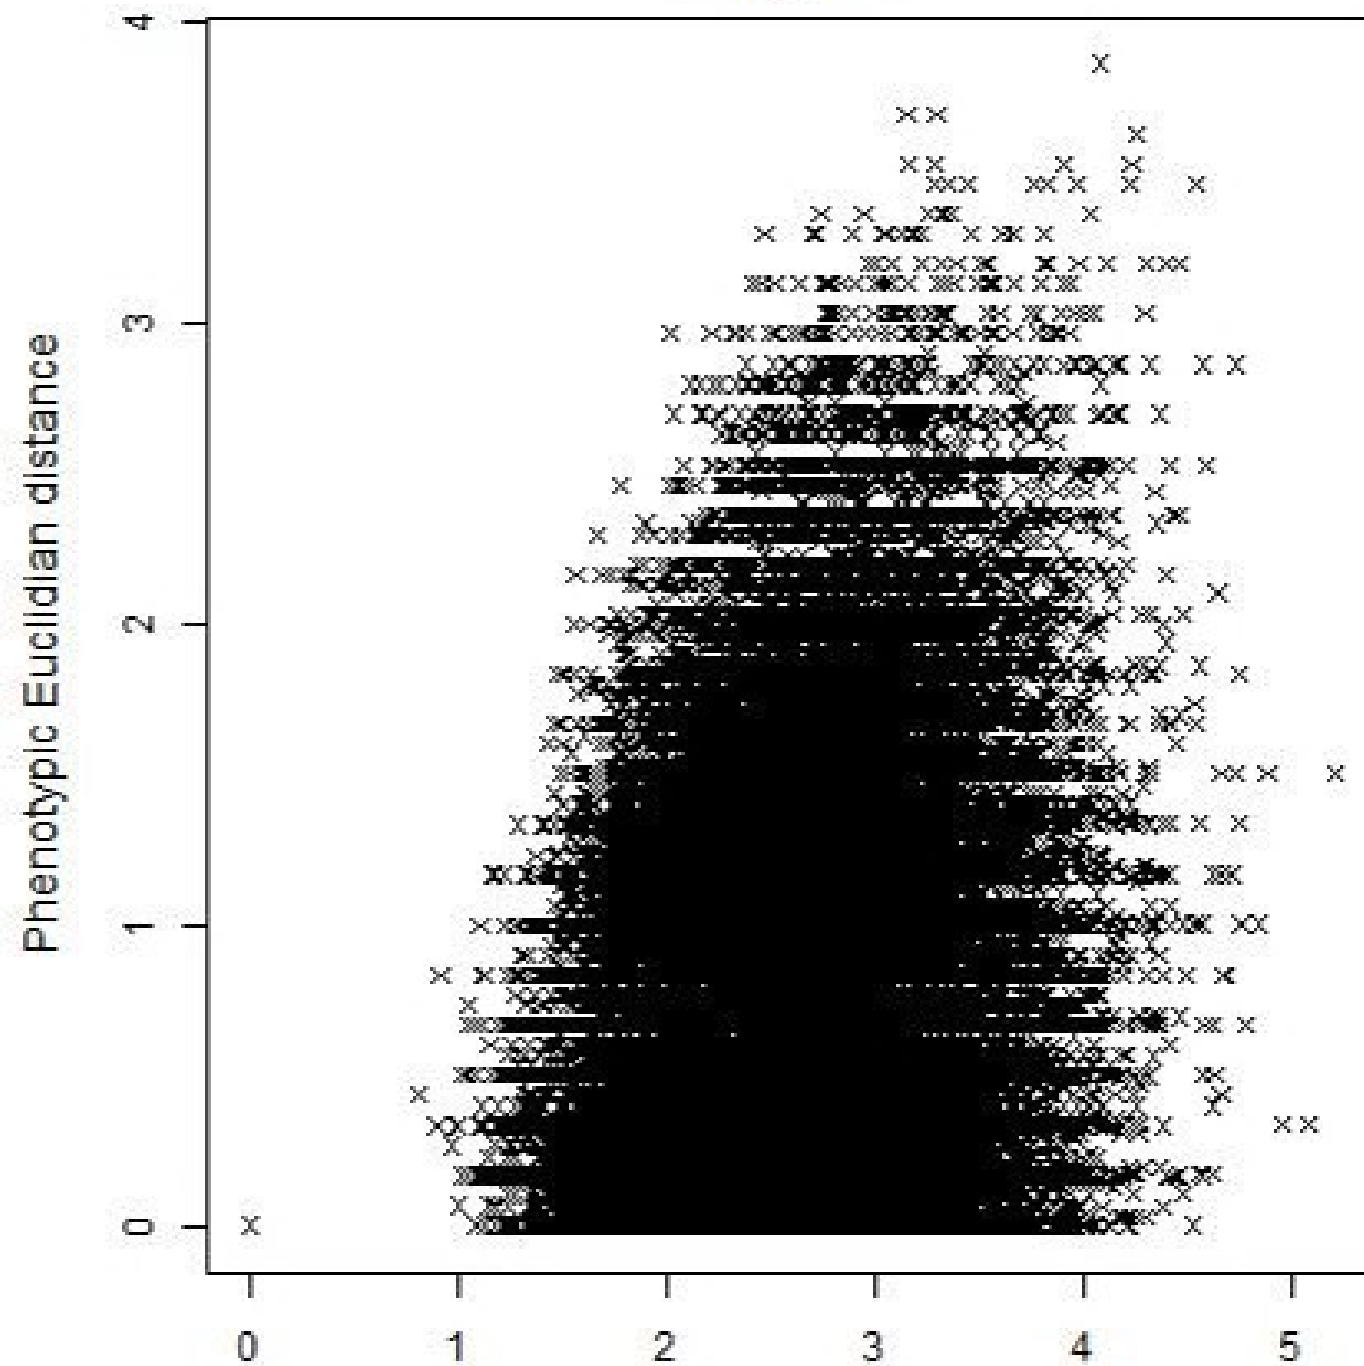

Genetic Euclidian distance (based on the 100 most significantly associated SNPs)

DRO\_po16

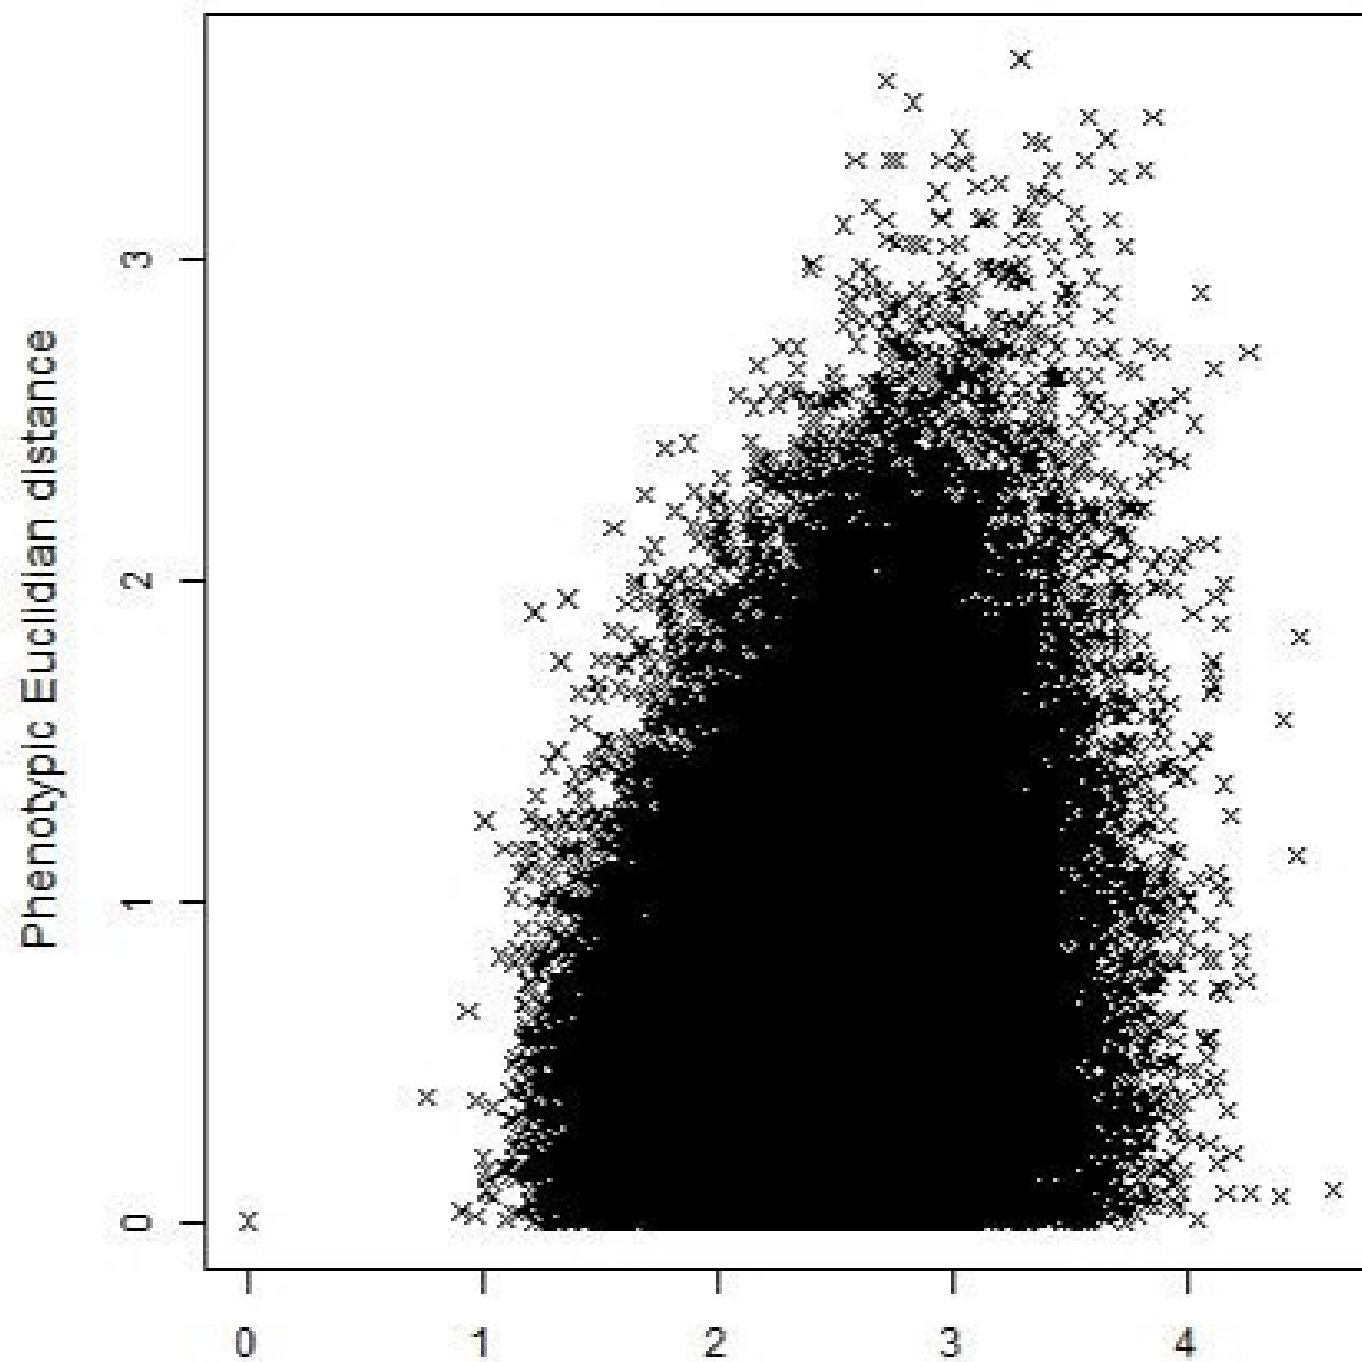

Genetic Euclidian distance (based on the 100 most significantly associated SNPs)



DST\_avg

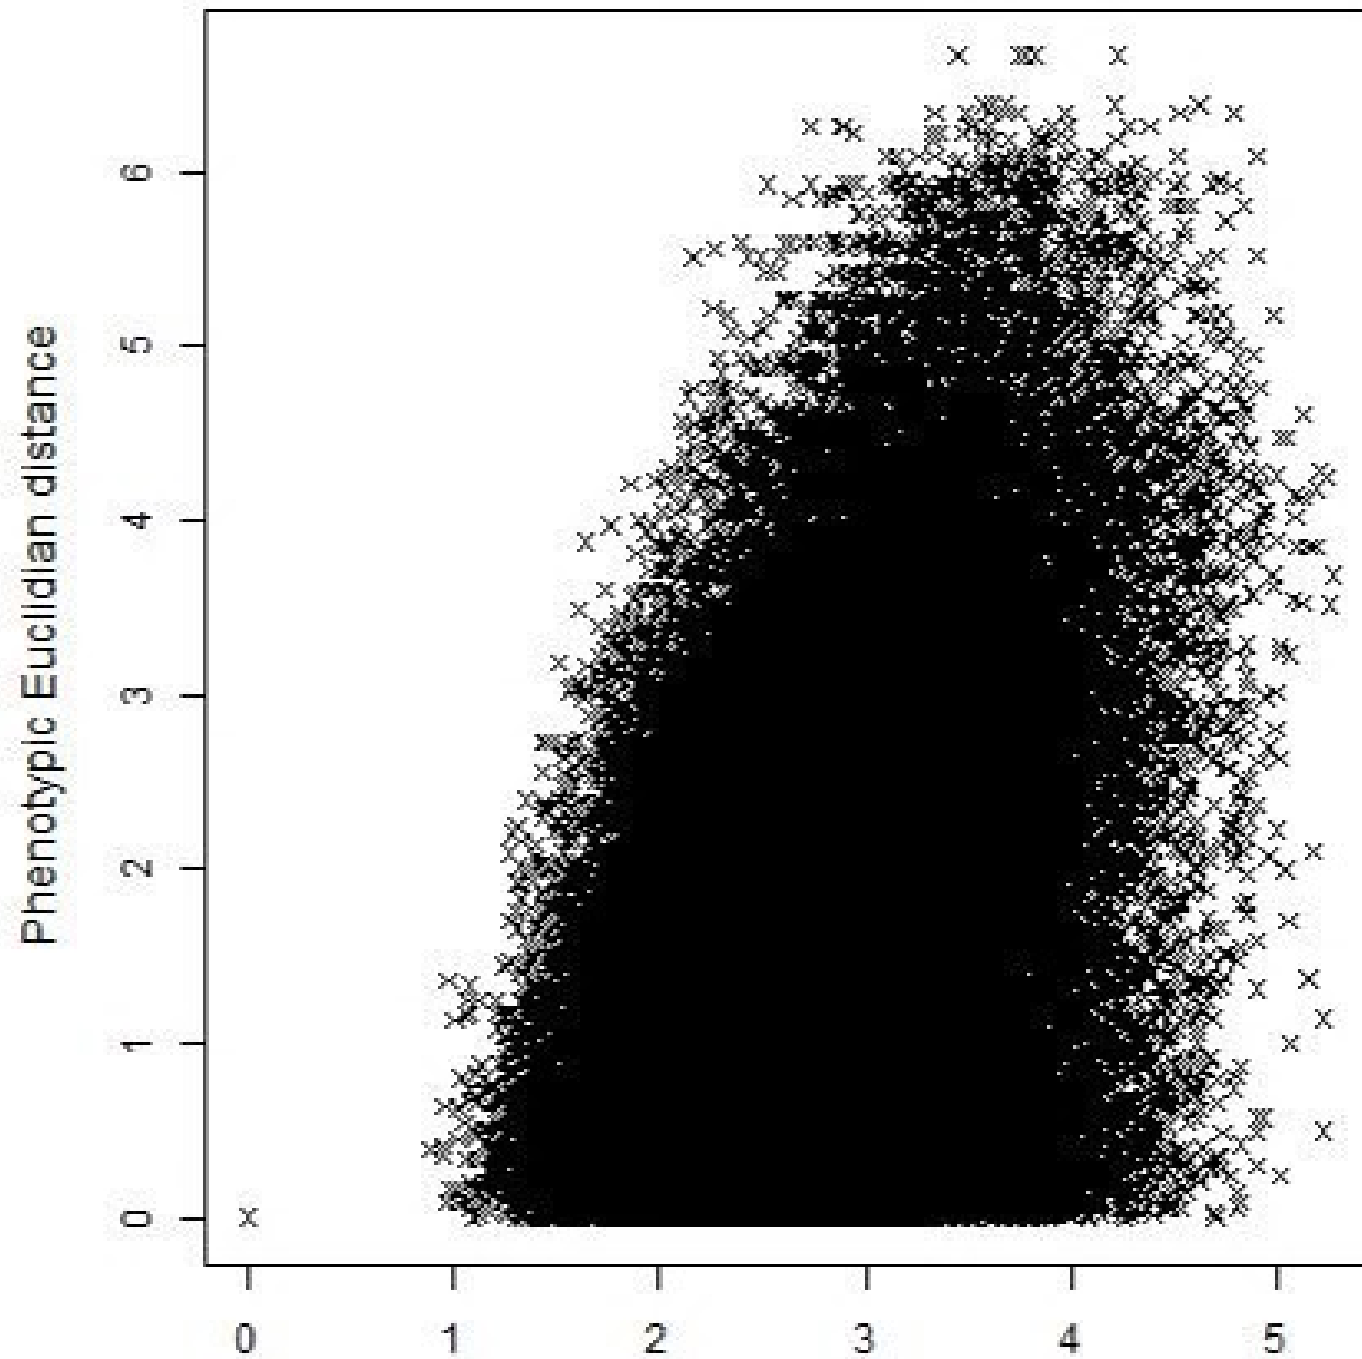

Genetic Euclidian distance (based on the 100 most significantly associated SNPs)

# DST\_lu17

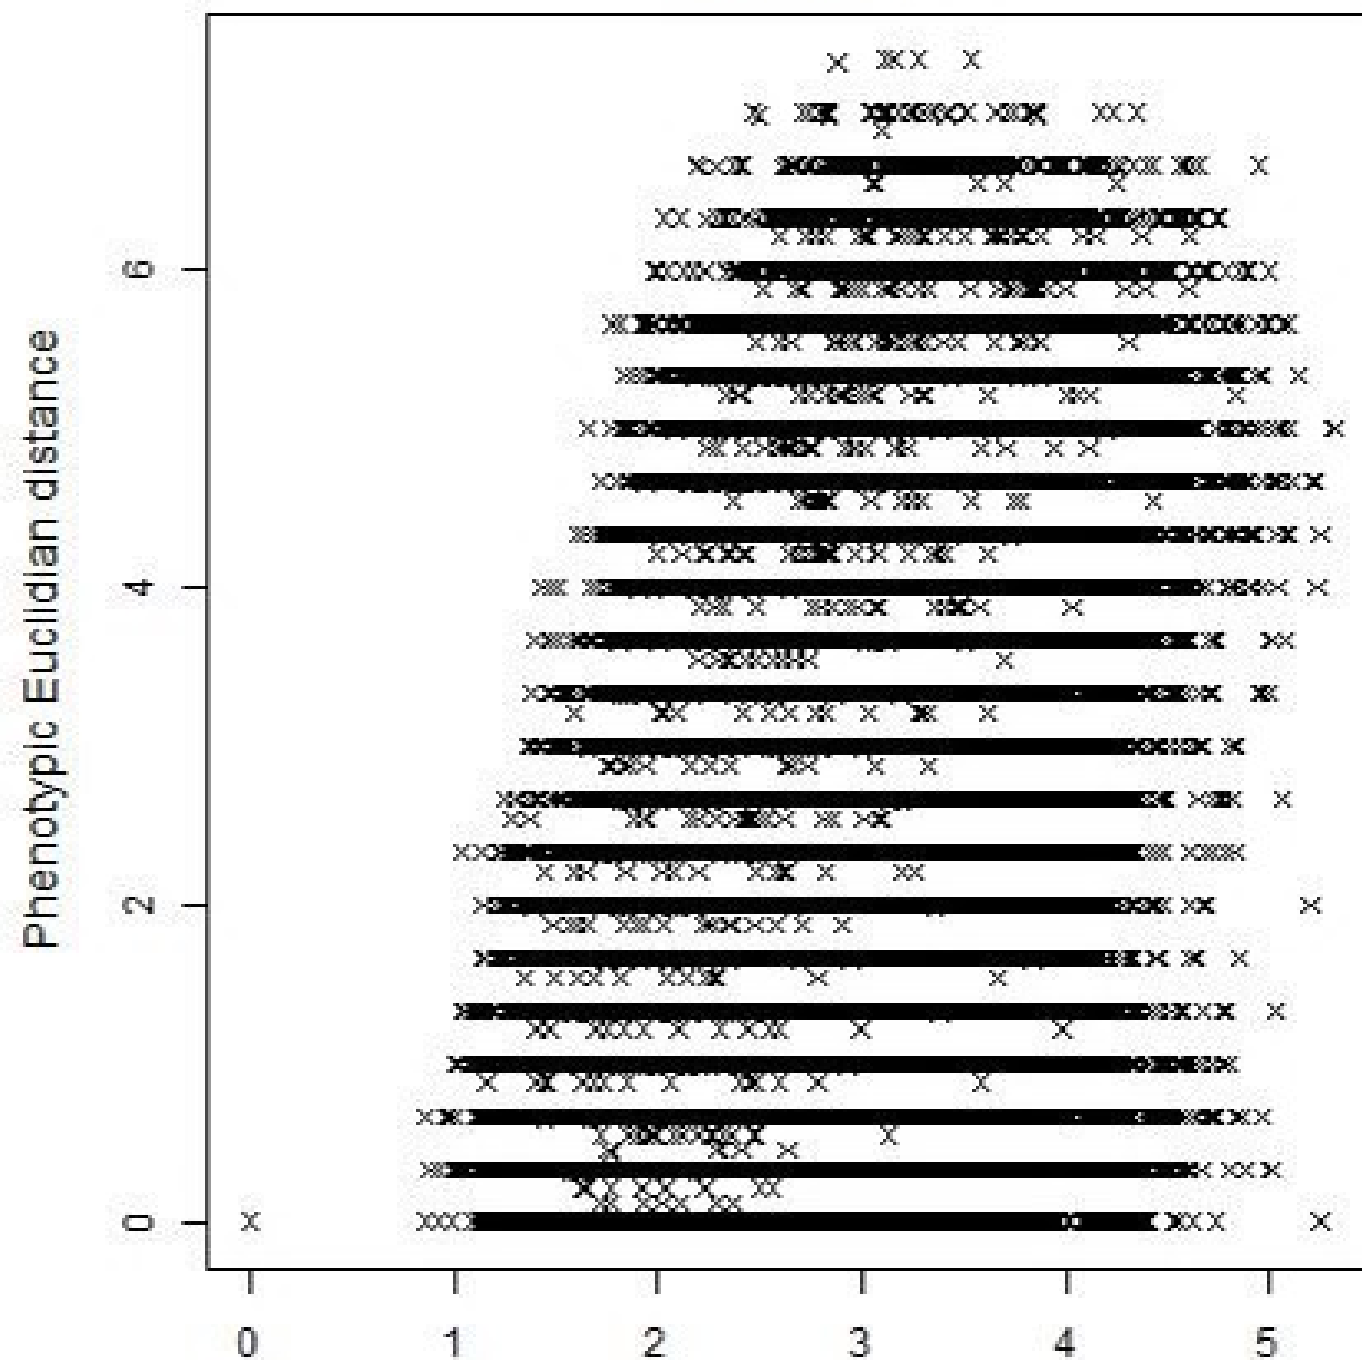

Genetic Euclidian distance (based on the 100 most significantly associated SNPs)

DST\_po17

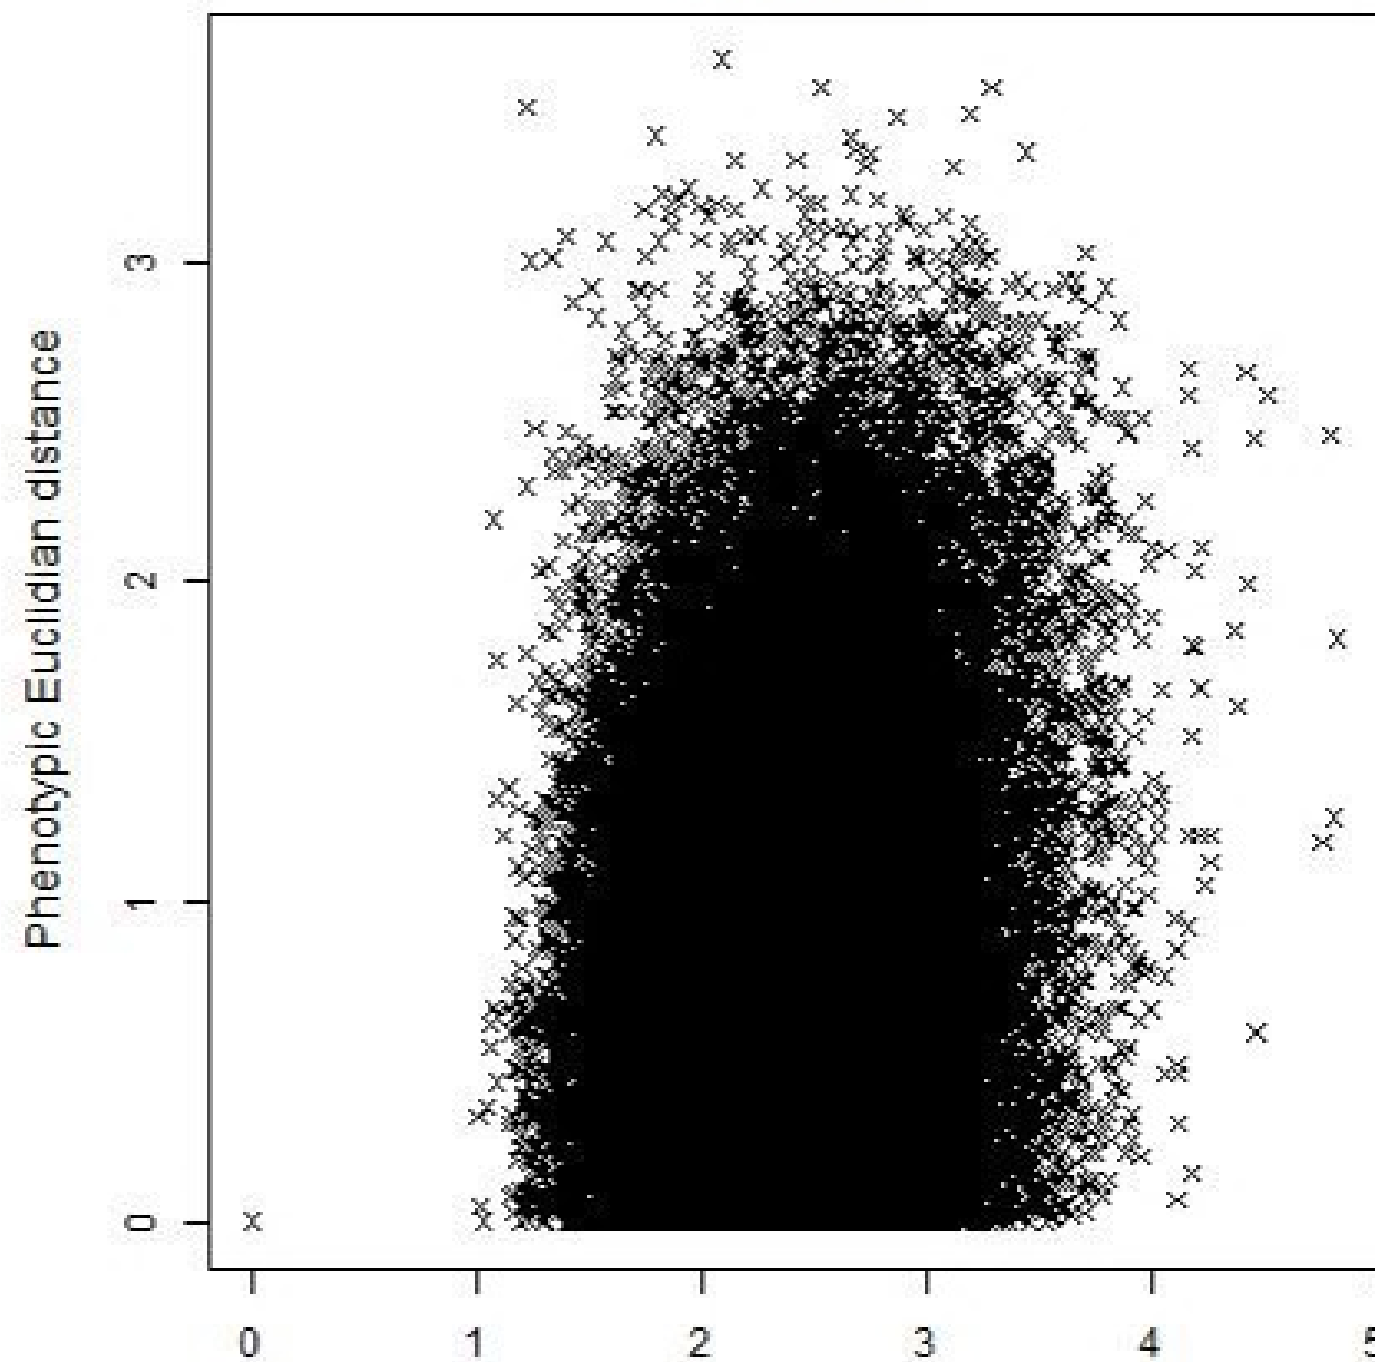

Genetic Euclidian distance (based on the 100 most significantly associated SNPs)

# DVG\_04\_lu17

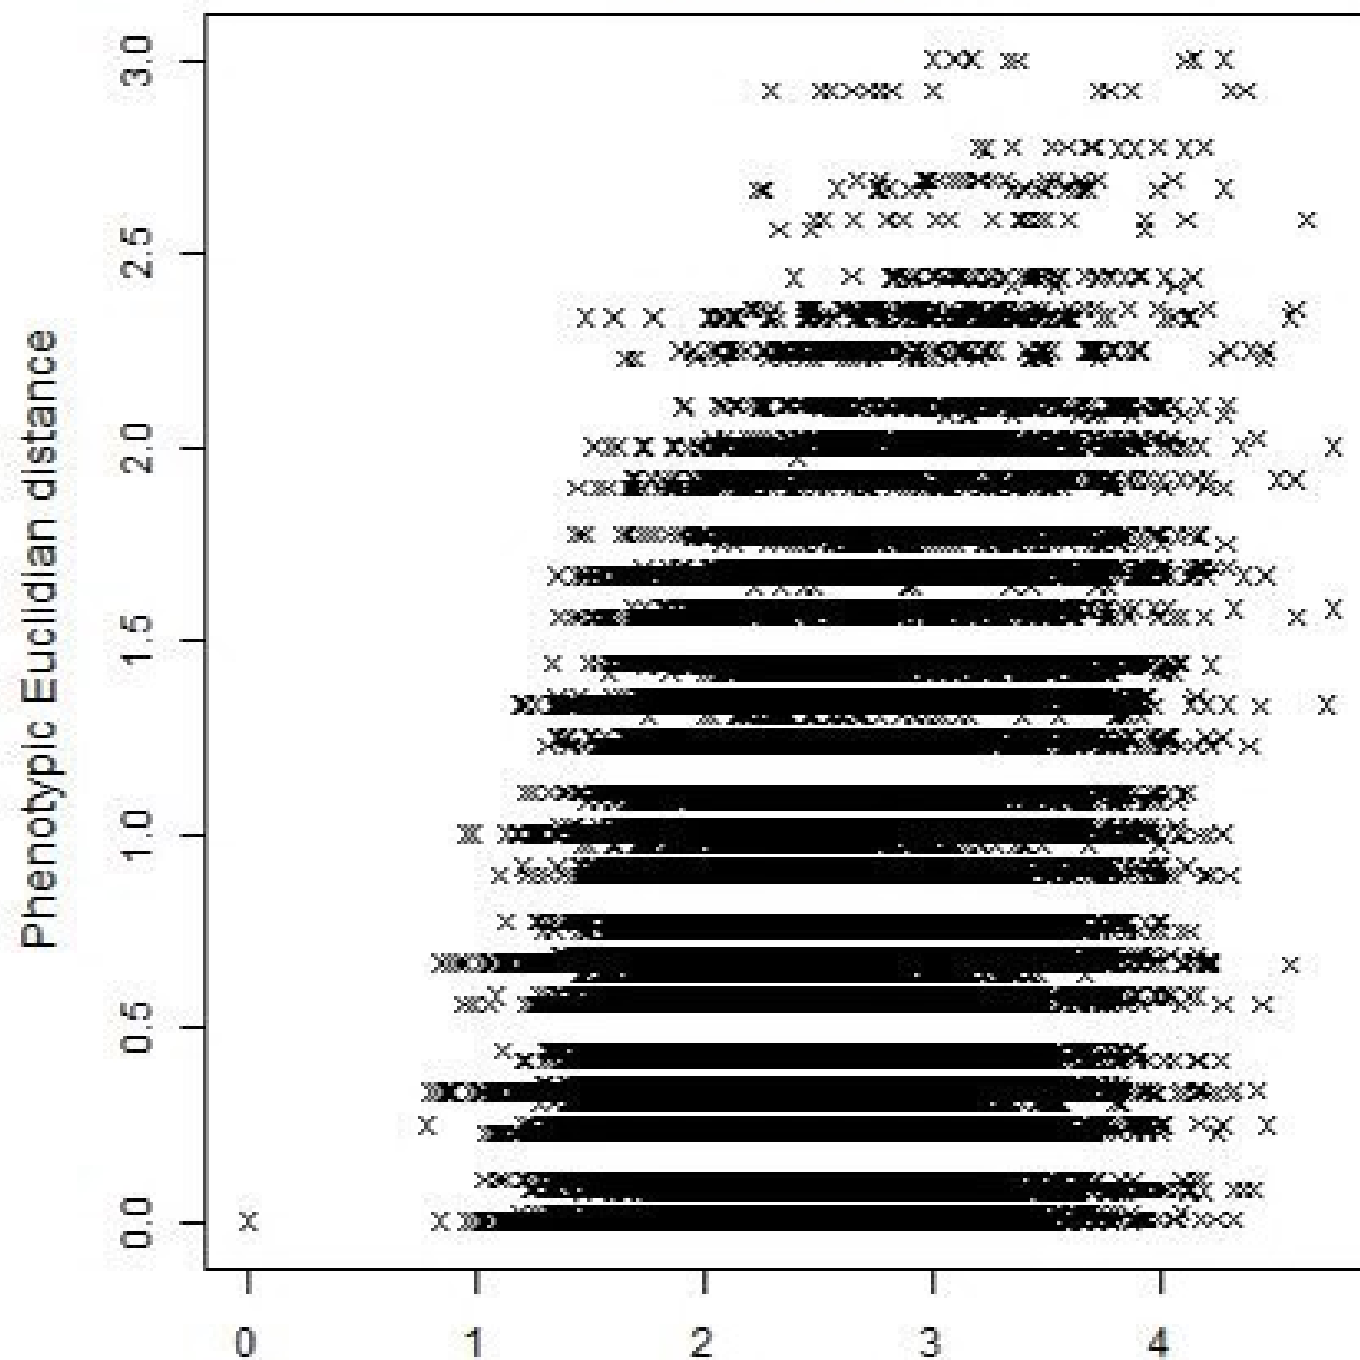

Genetic Euclidian distance (based on the 100 most significantly associated SNPs)

GRH\_avg

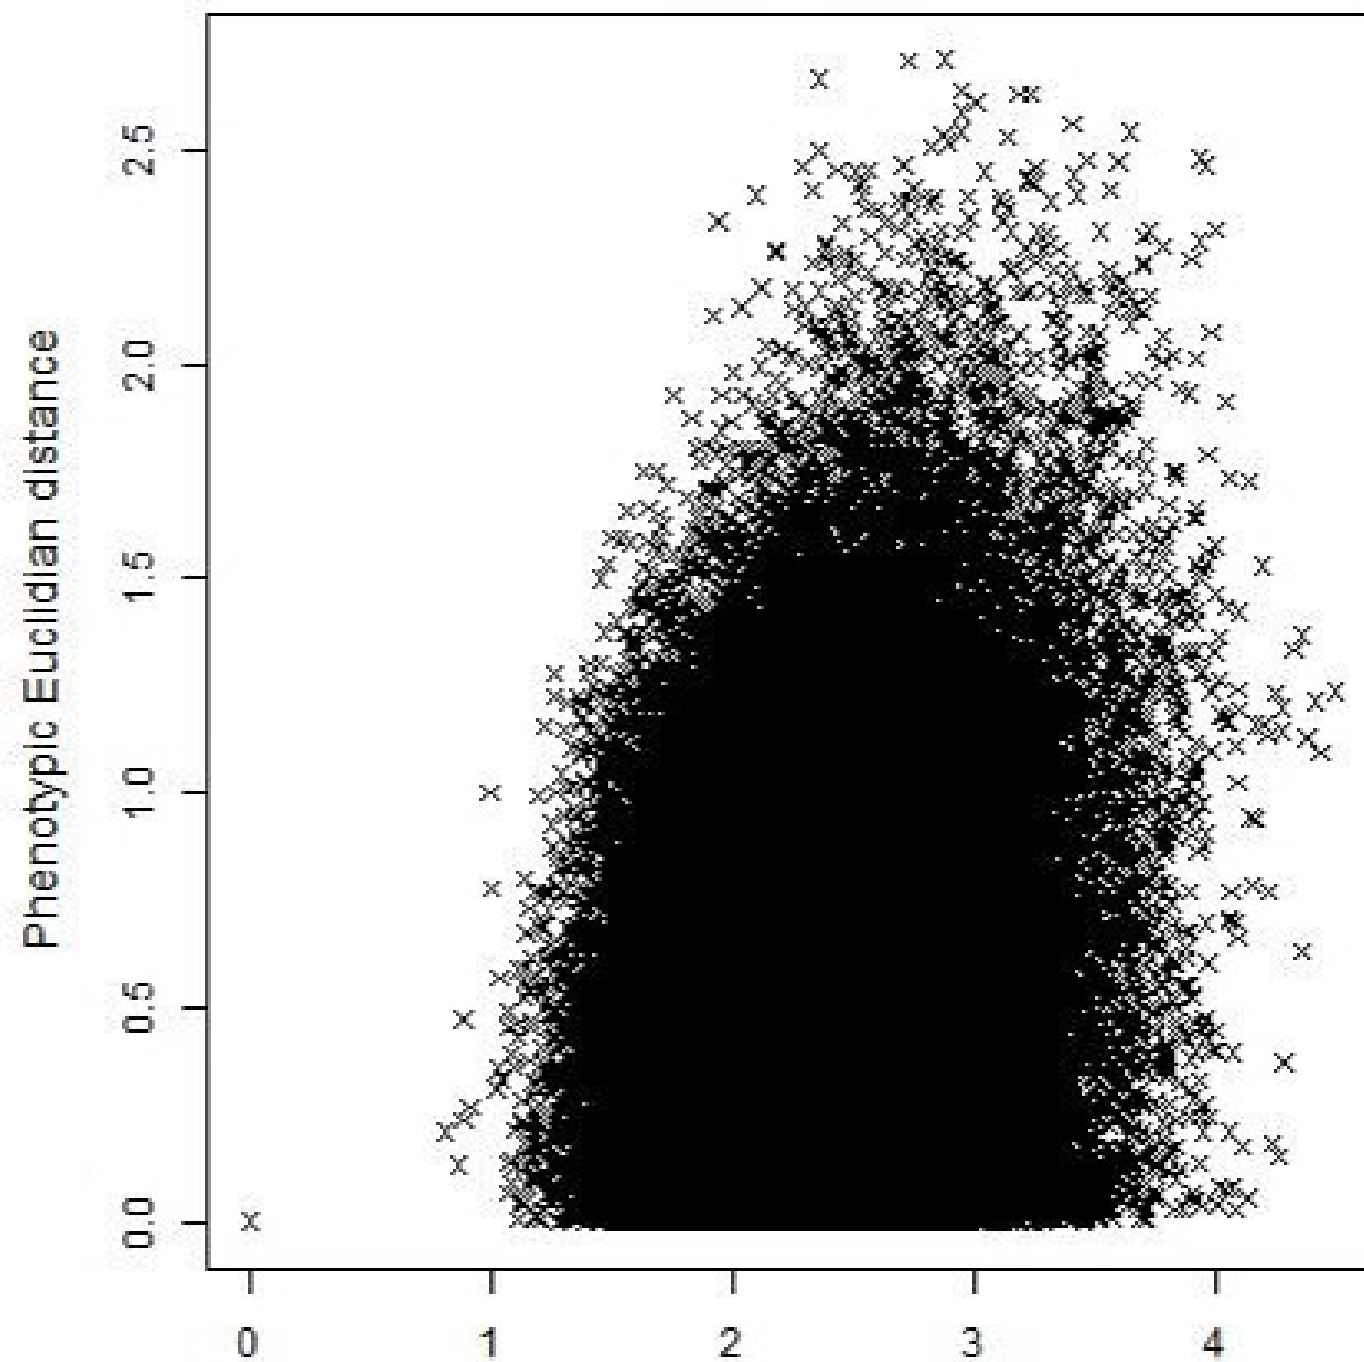

Genetic Euclidian distance (based on the 100 most significantly associated SNPs)

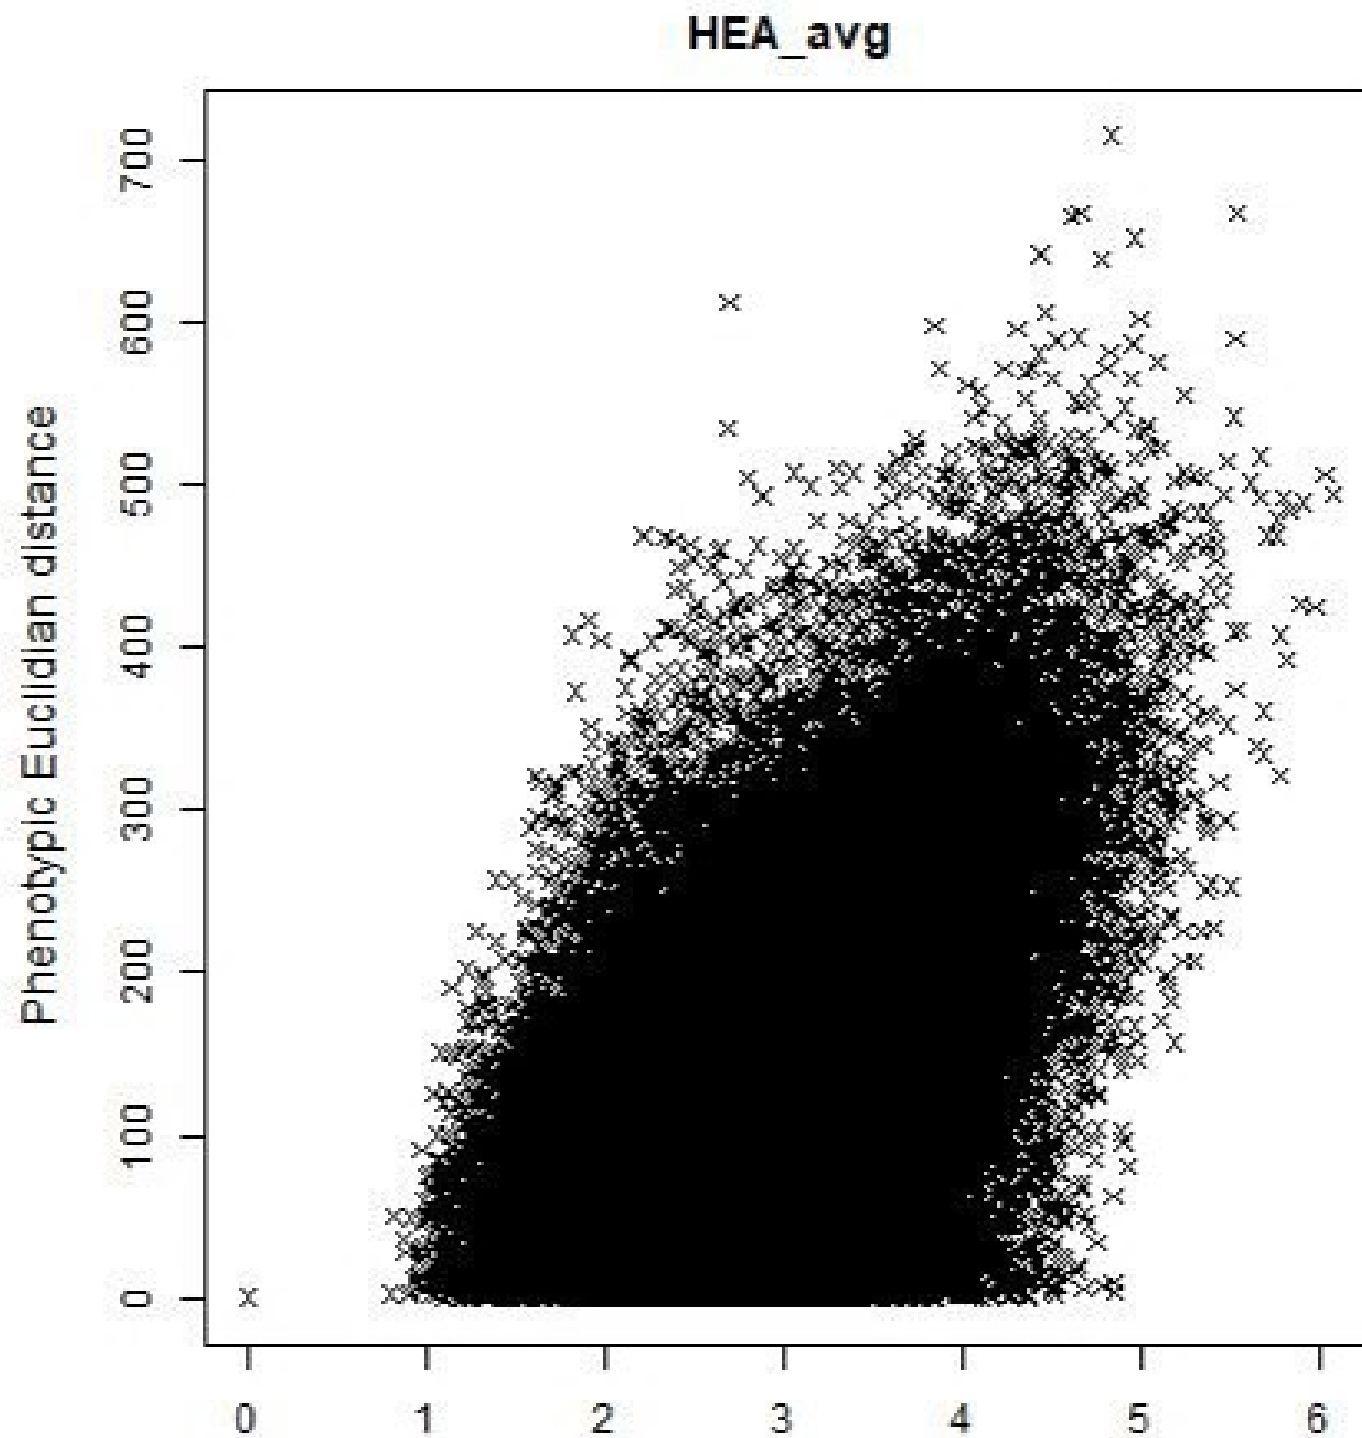

Genetic Euclidian distance (based on the 100 most significantly associated SNPs)

# HEA\_lu16

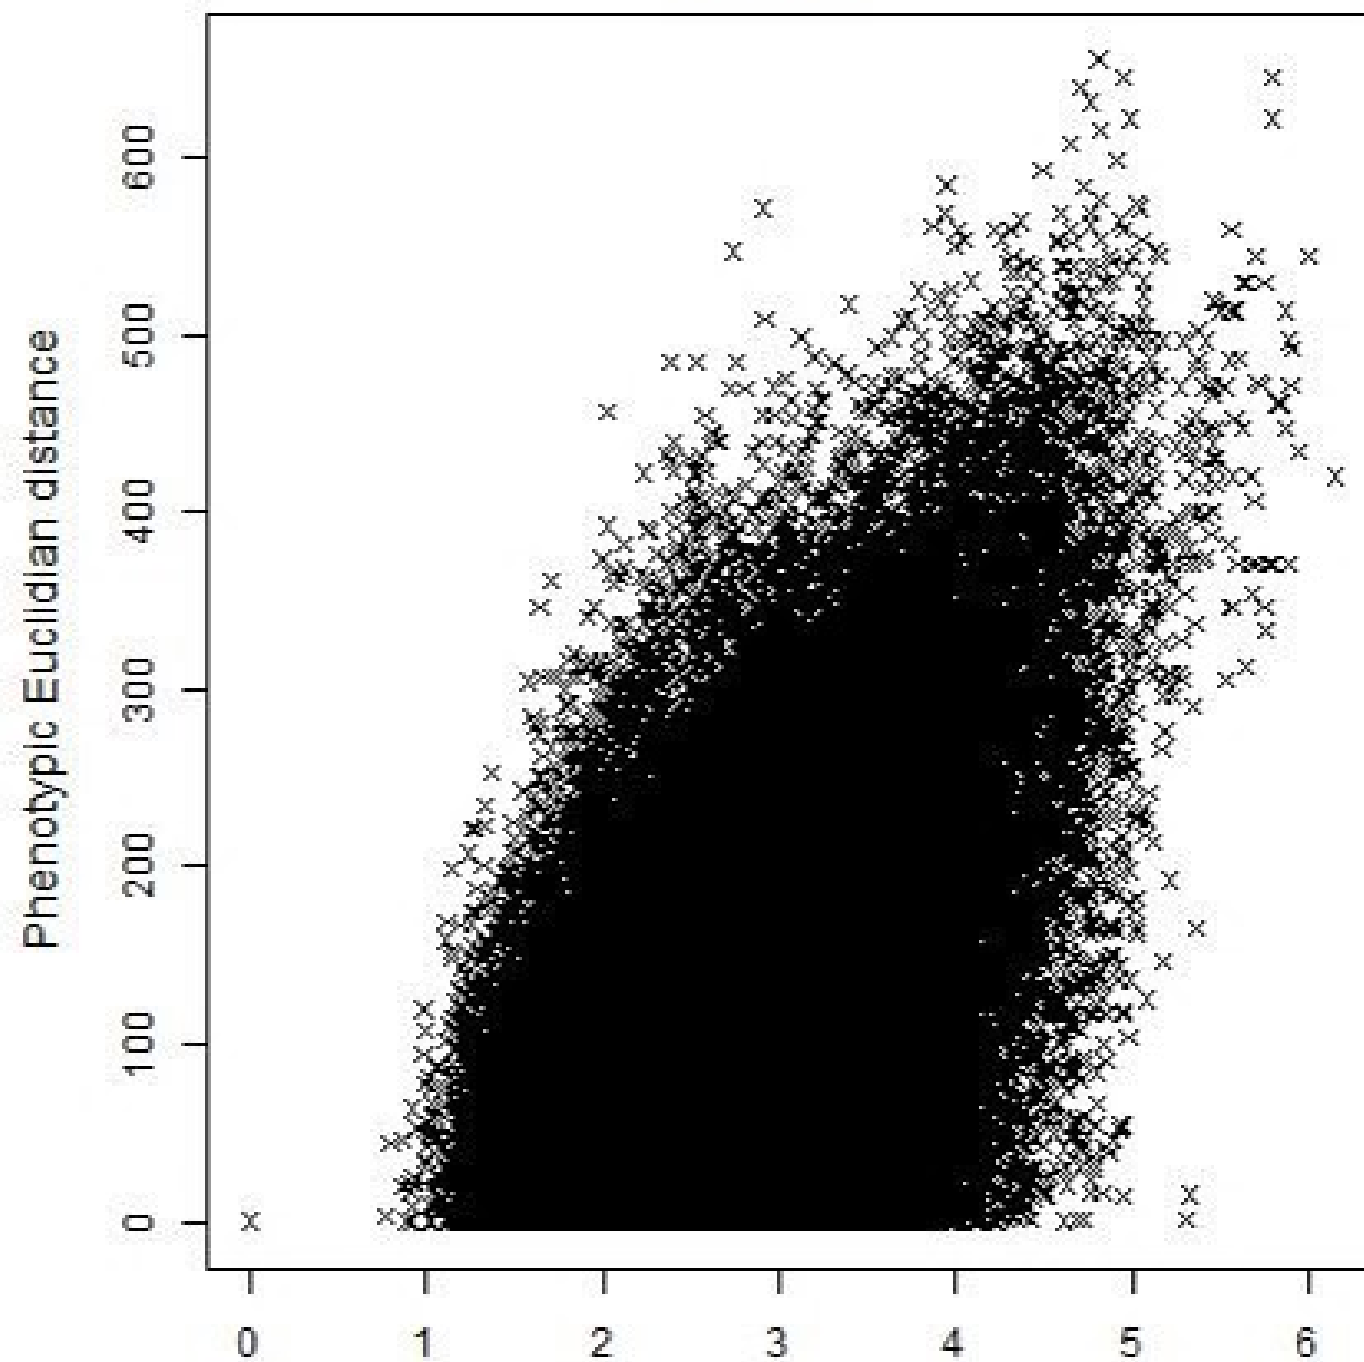

Genetic Euclidian distance (based on the 100 most significantly associated SNPs)

HEA\_lu17

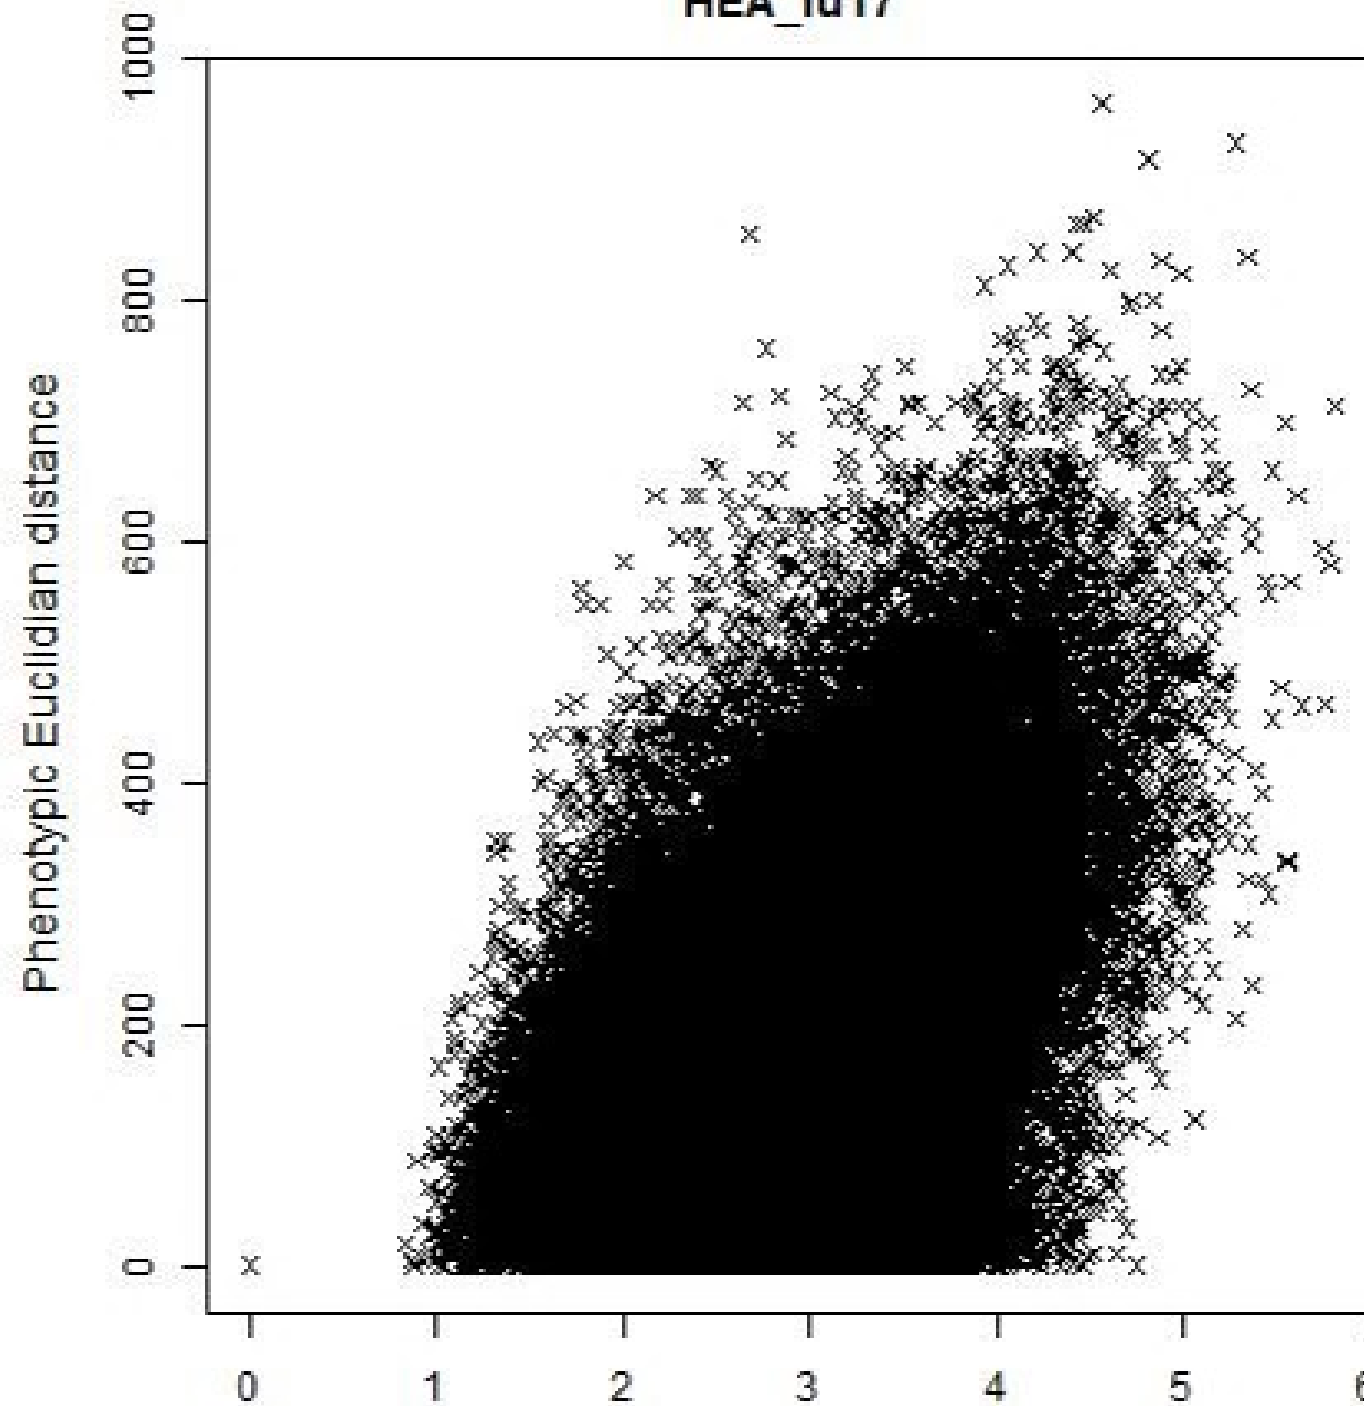

Genetic Euclidian distance (based on the 100 most significantly associated SNPs)



# HEA\_po16

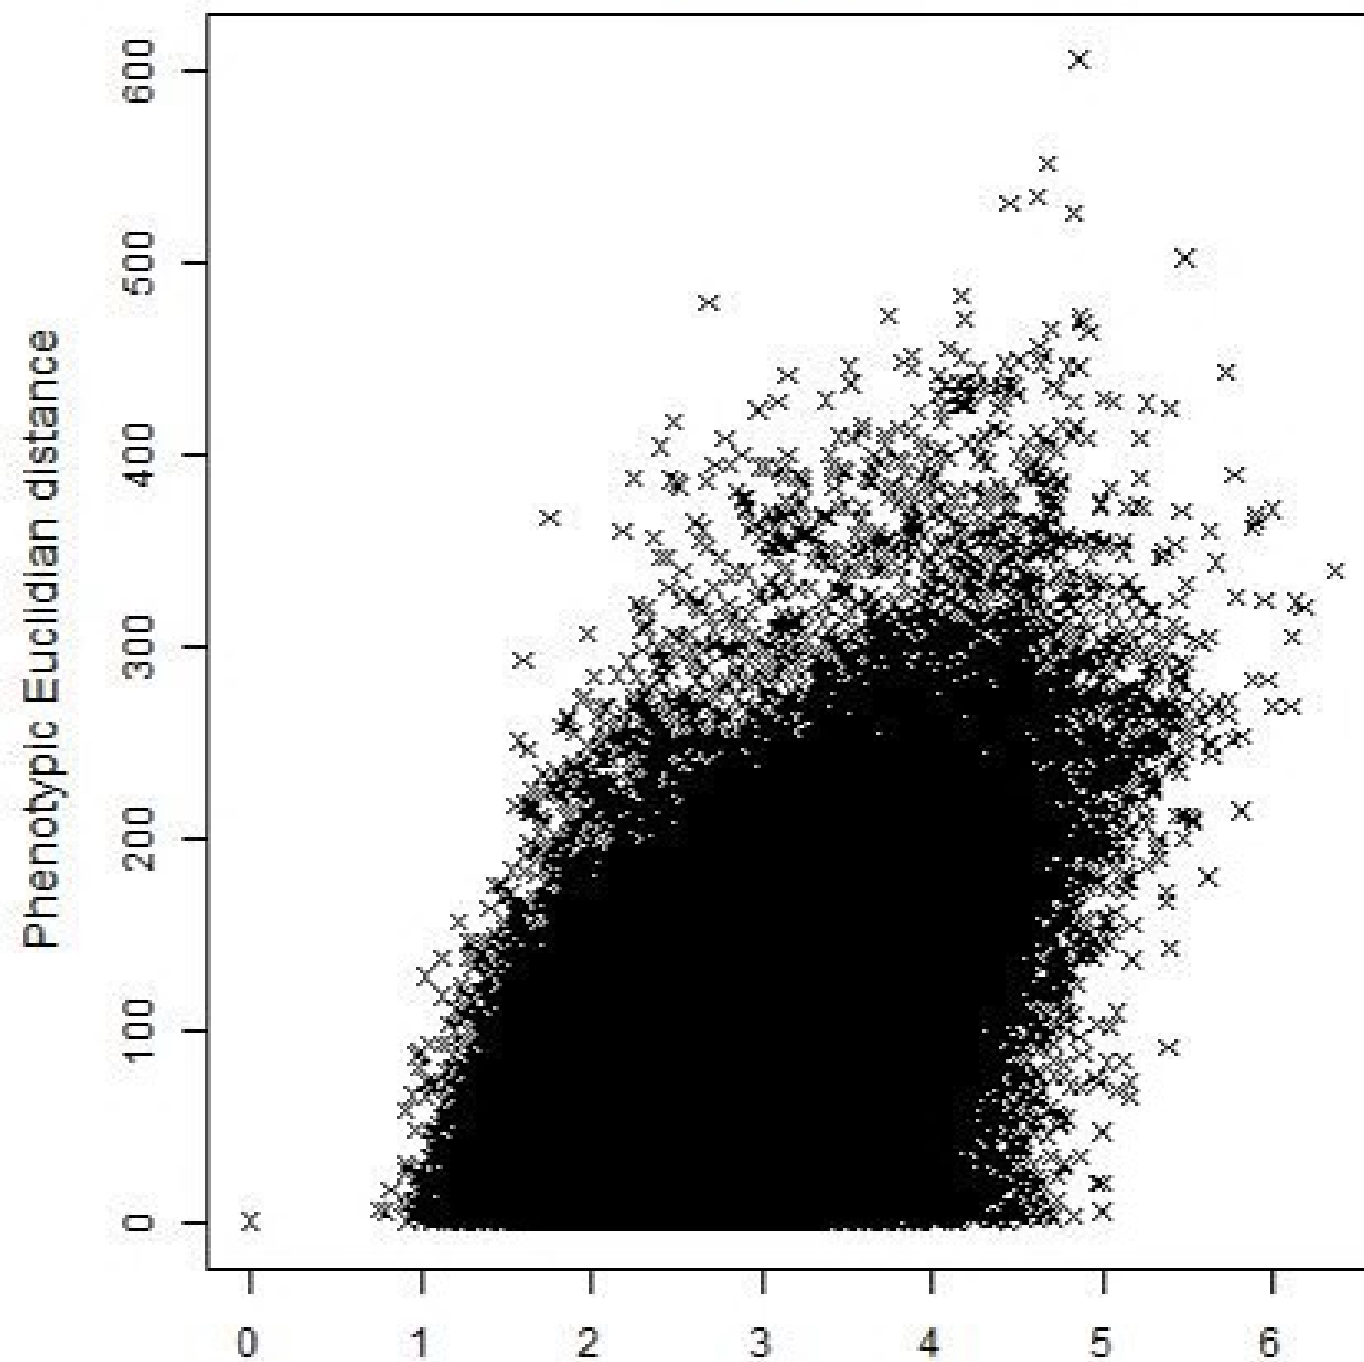

Genetic Euclidian distance (based on the 100 most significantly associated SNPs)

HEA\_po17

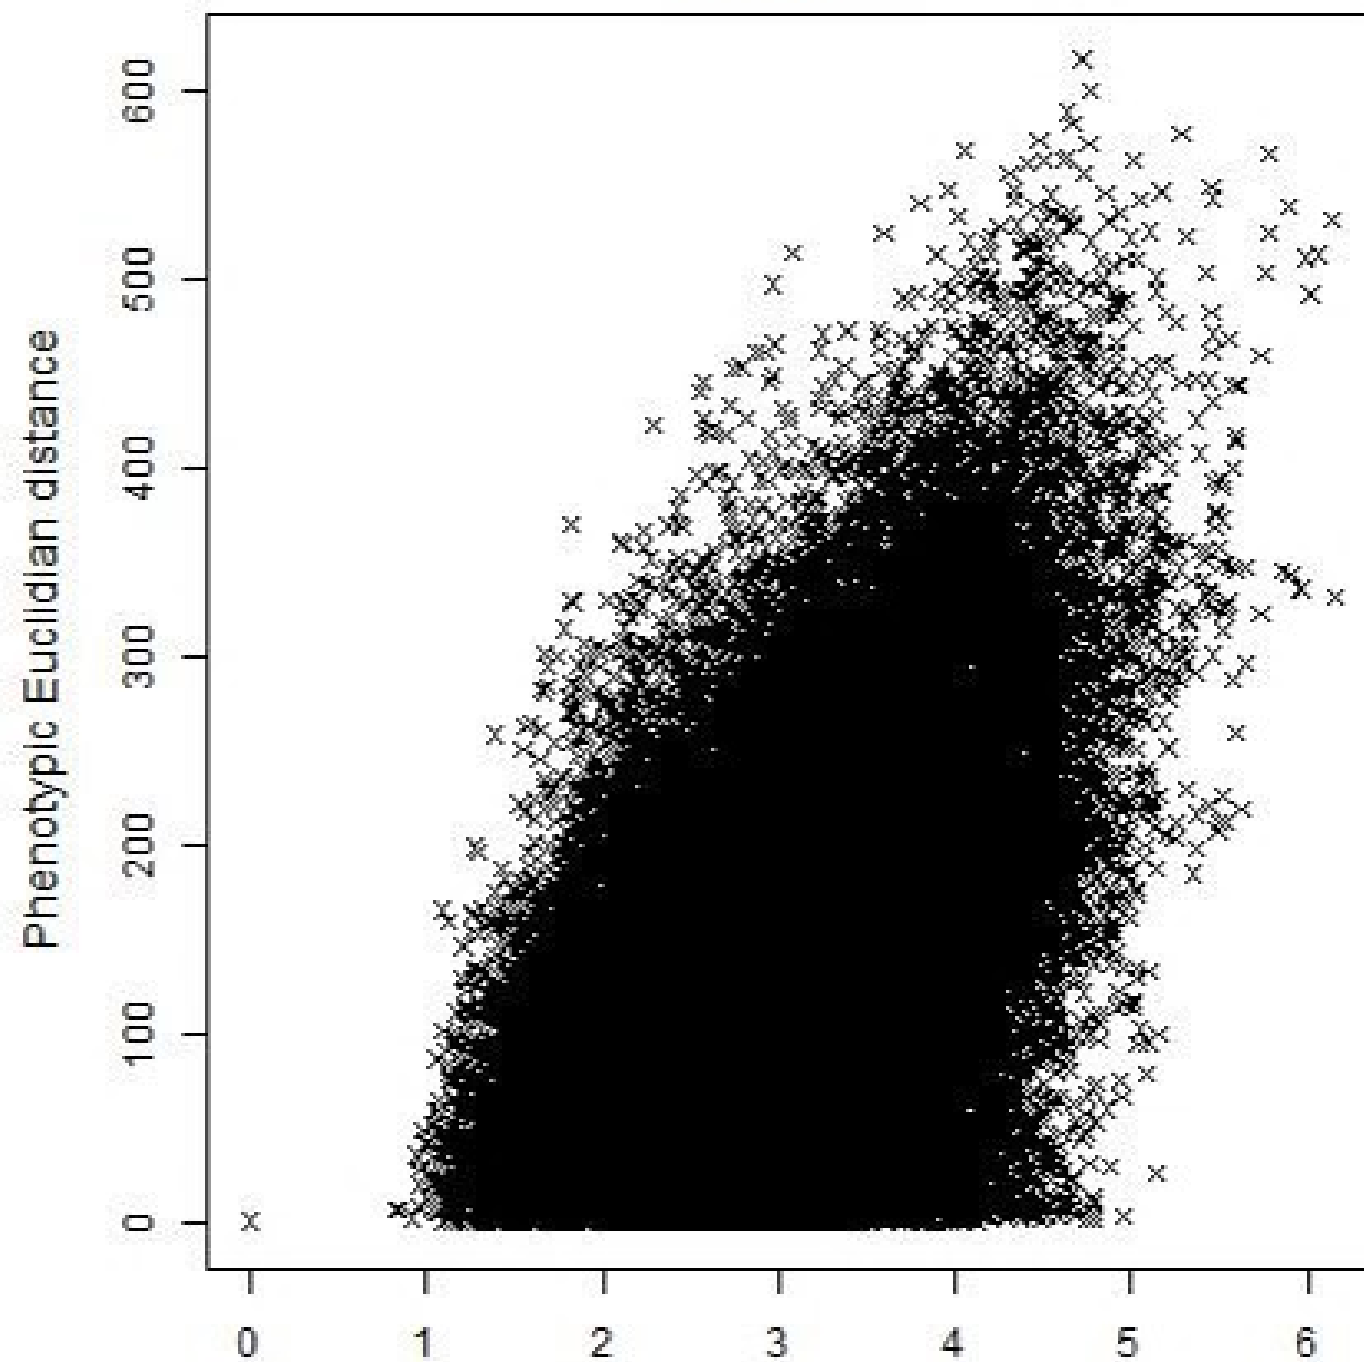

Genetic Euclidian distance (based on the 100 most significantly associated SNPs)

HFY\_avg

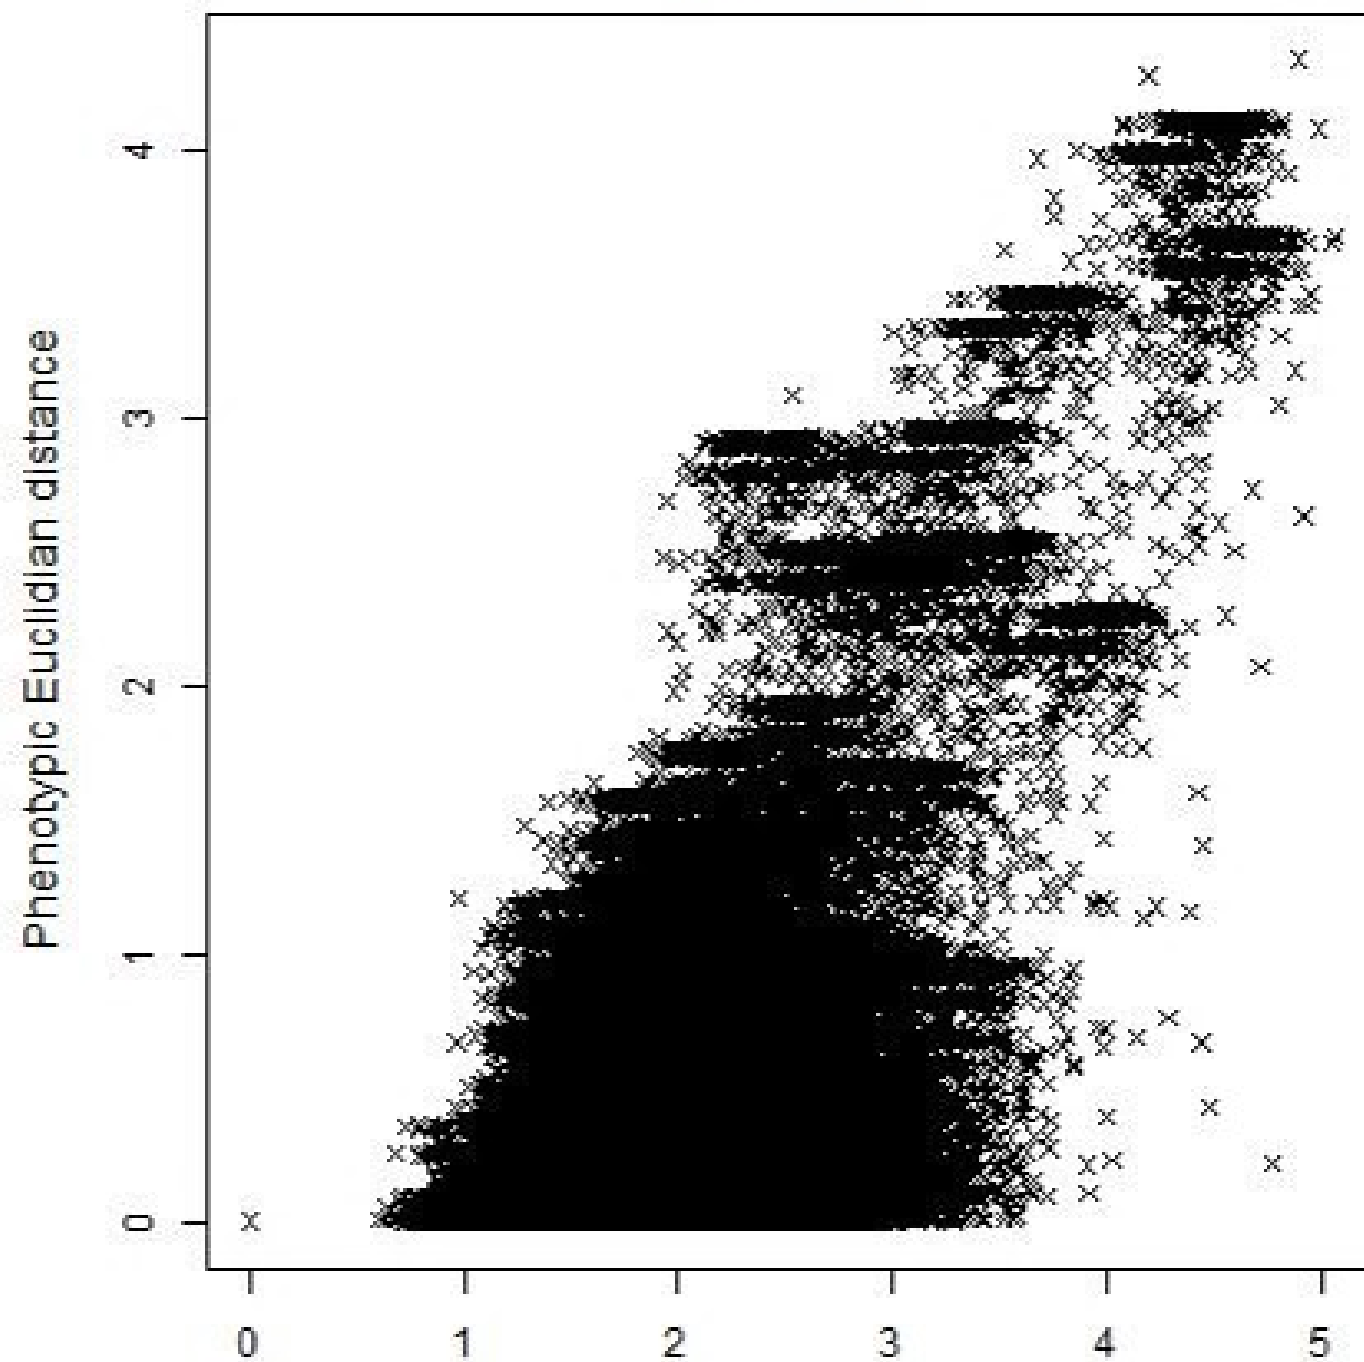

Genetic Euclidian distance (based on the 100 most significantly associated SNPs)

# HFY\_lu15

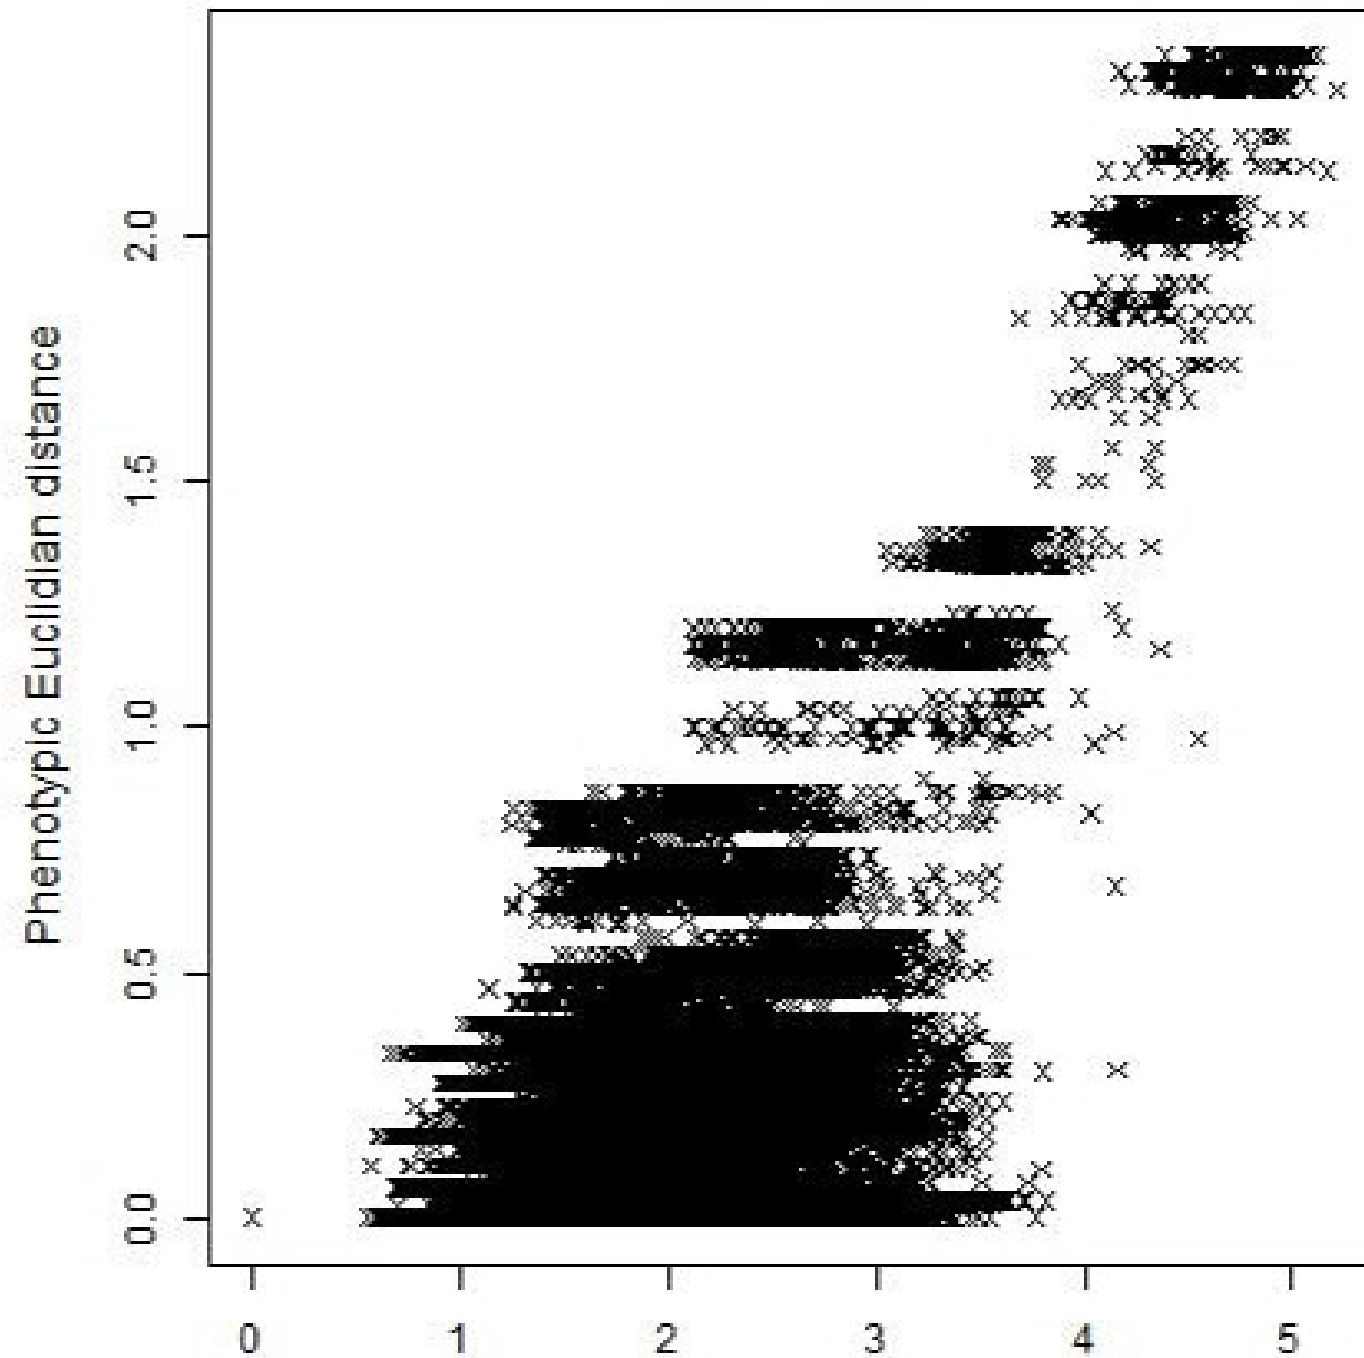

Genetic Euclidian distance (based on the 100 most significantly associated SNPs)

# HFY\_po15

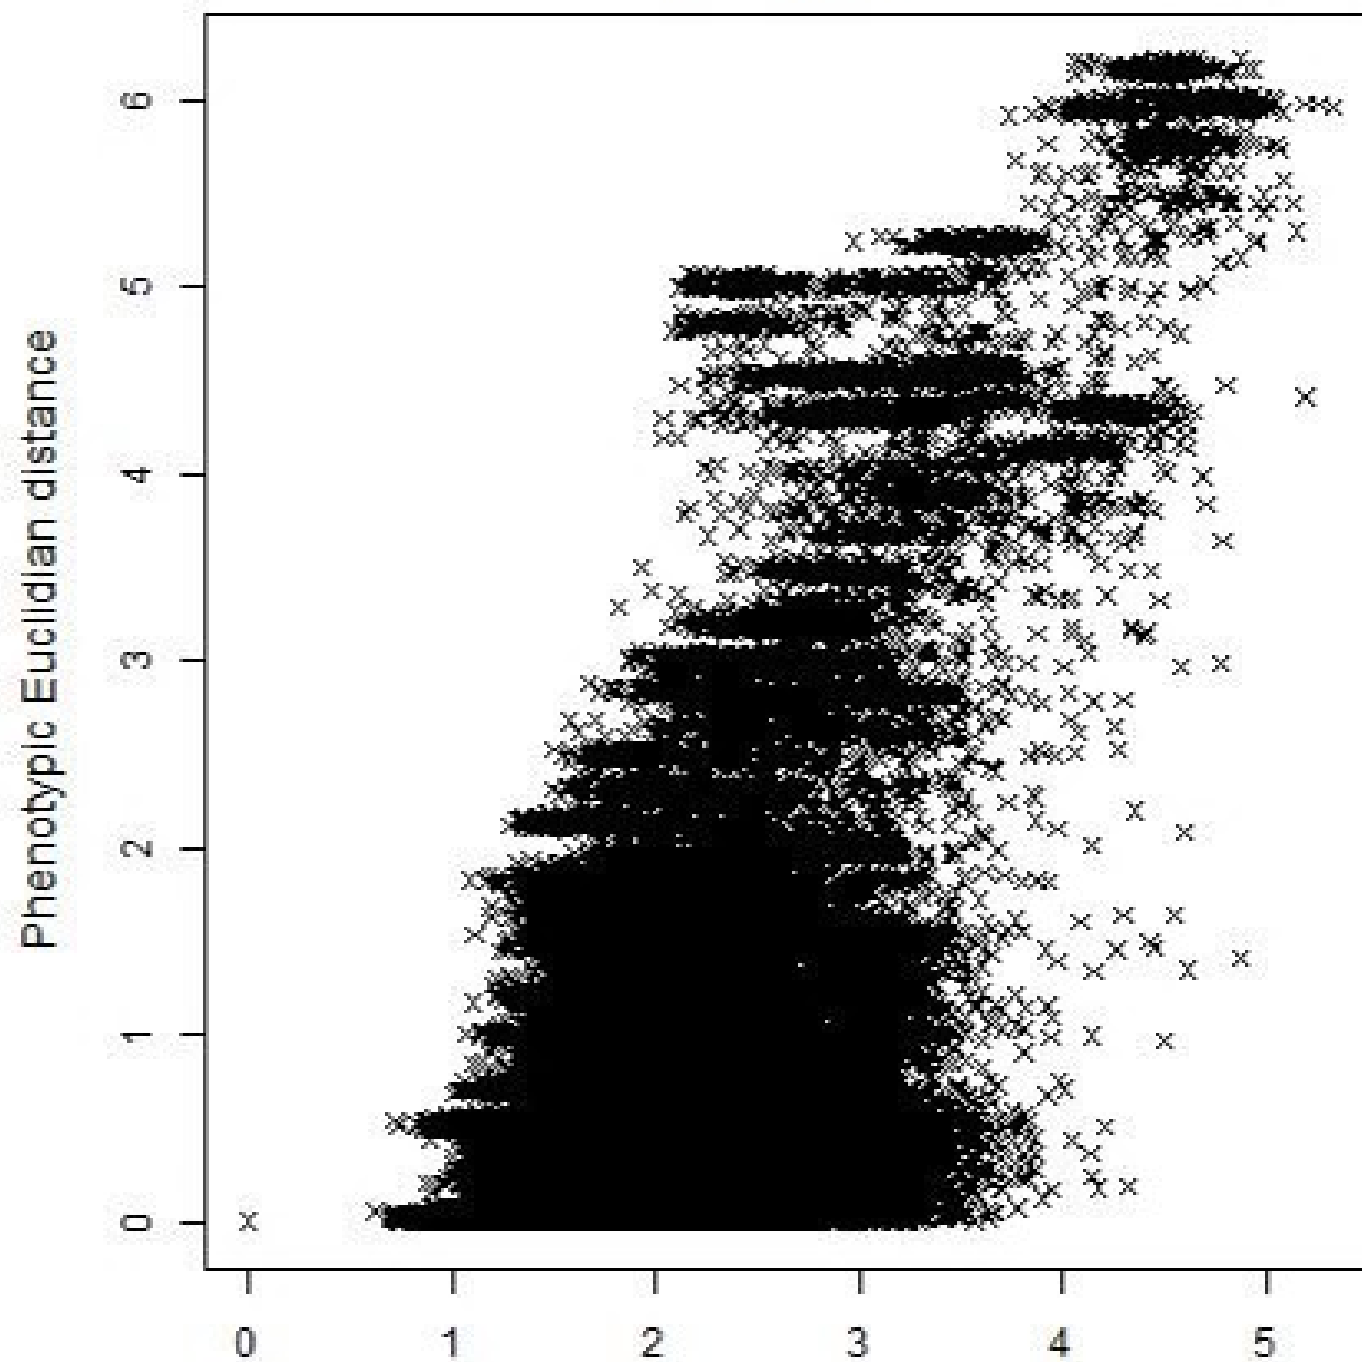

Genetic Euclidian distance (based on the 100 most significantly associated SNPs)

# HST\_lu17

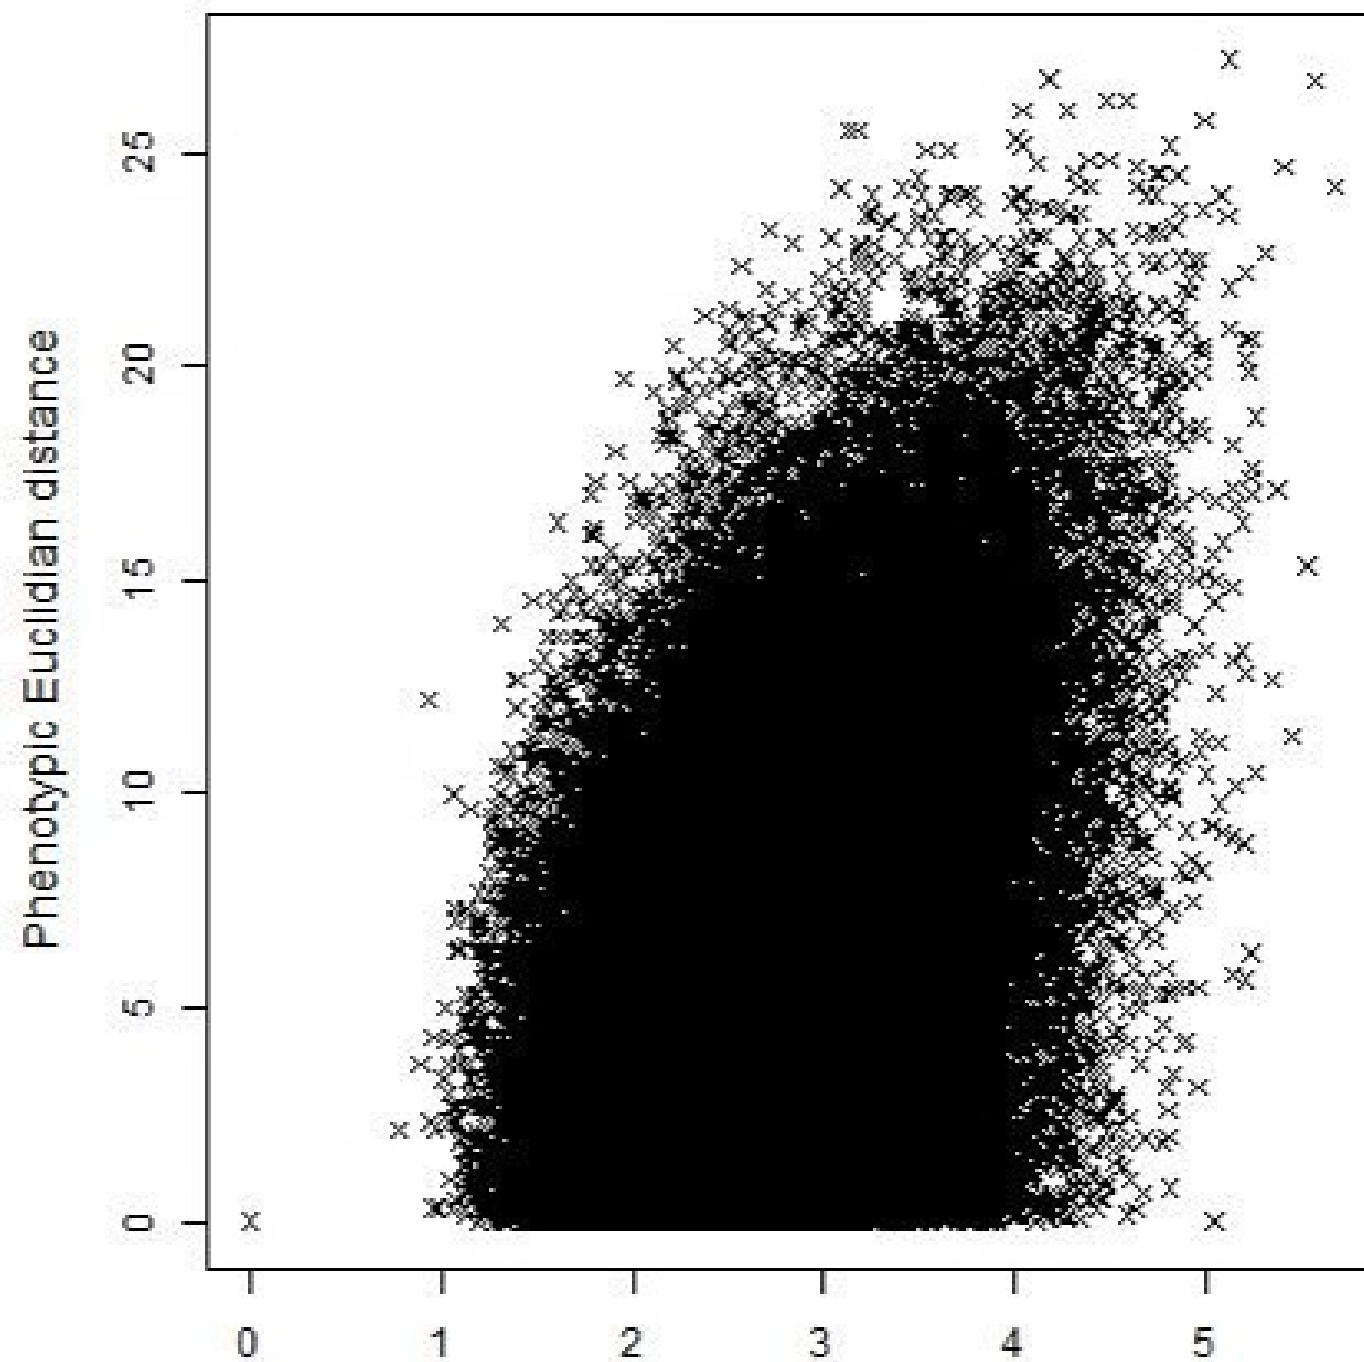

Genetic Euclidian distance (based on the 100 most significantly associated SNPs)

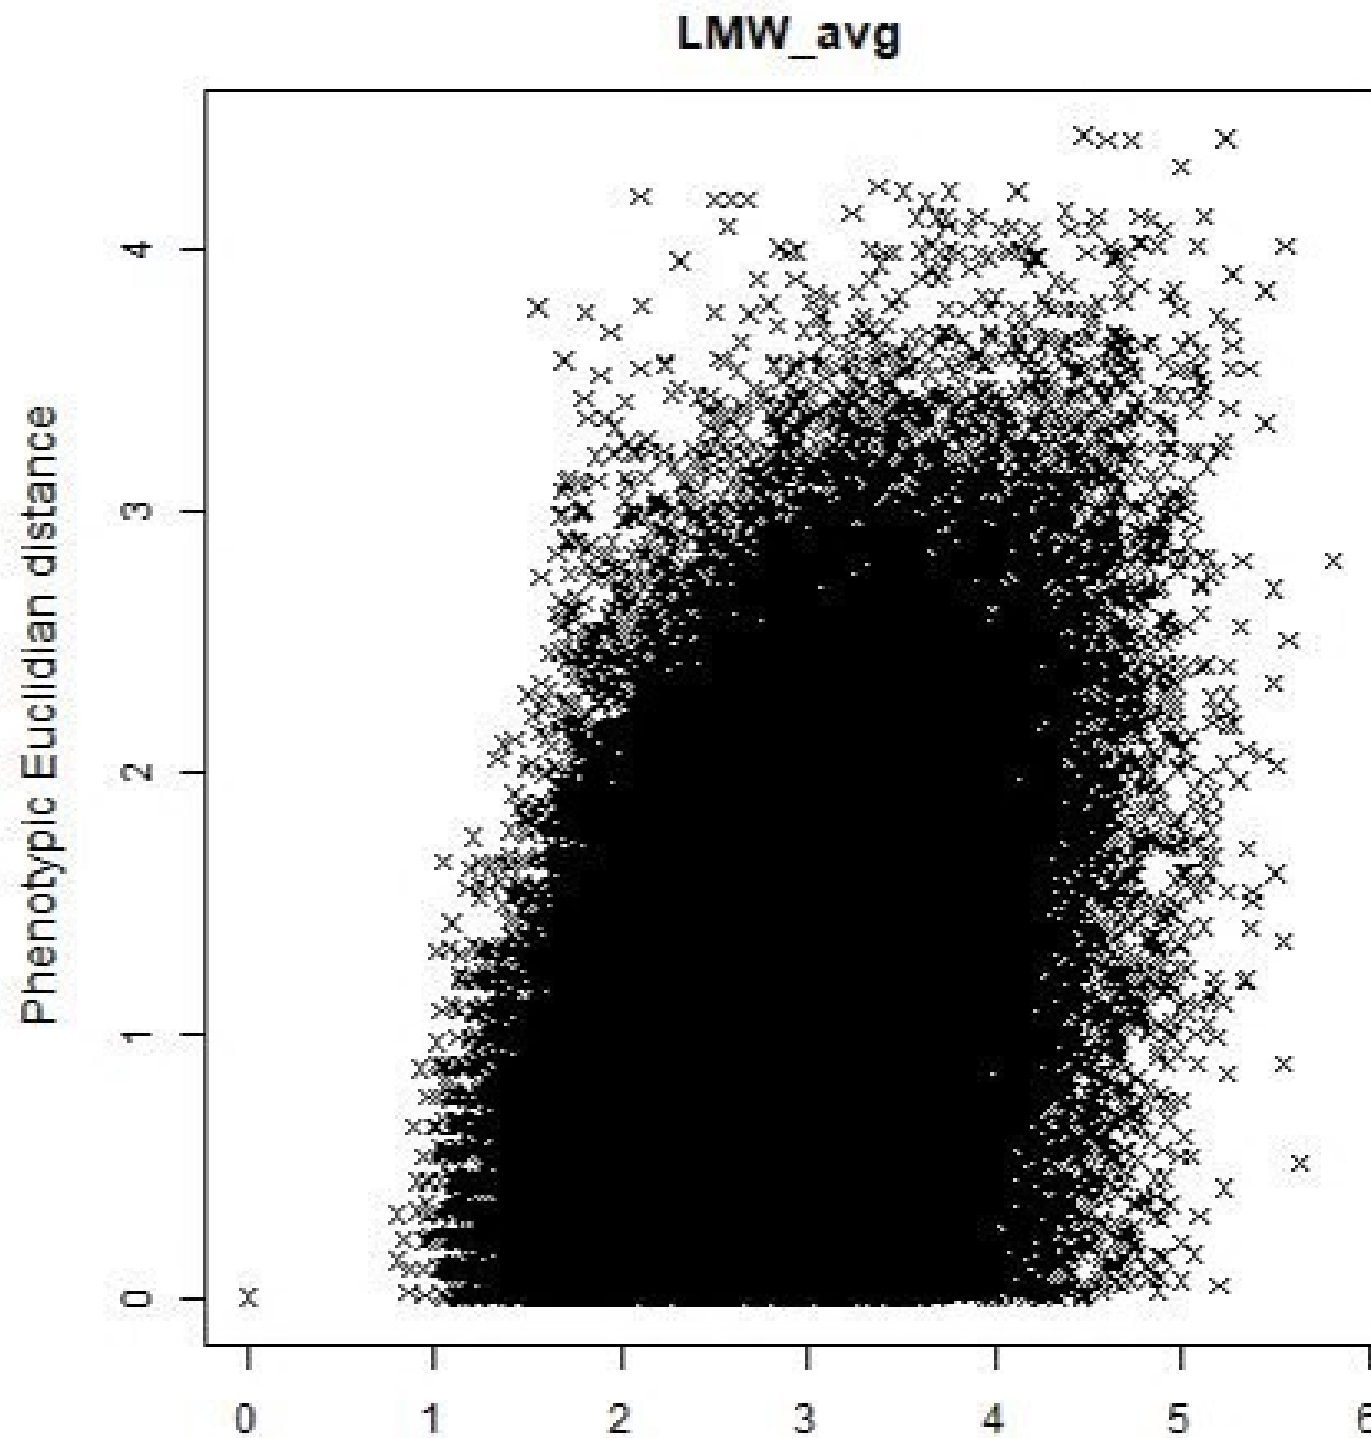

Genetic Euclidian distance (based on the 100 most significantly associated SNPs)

# LMW\_lu17

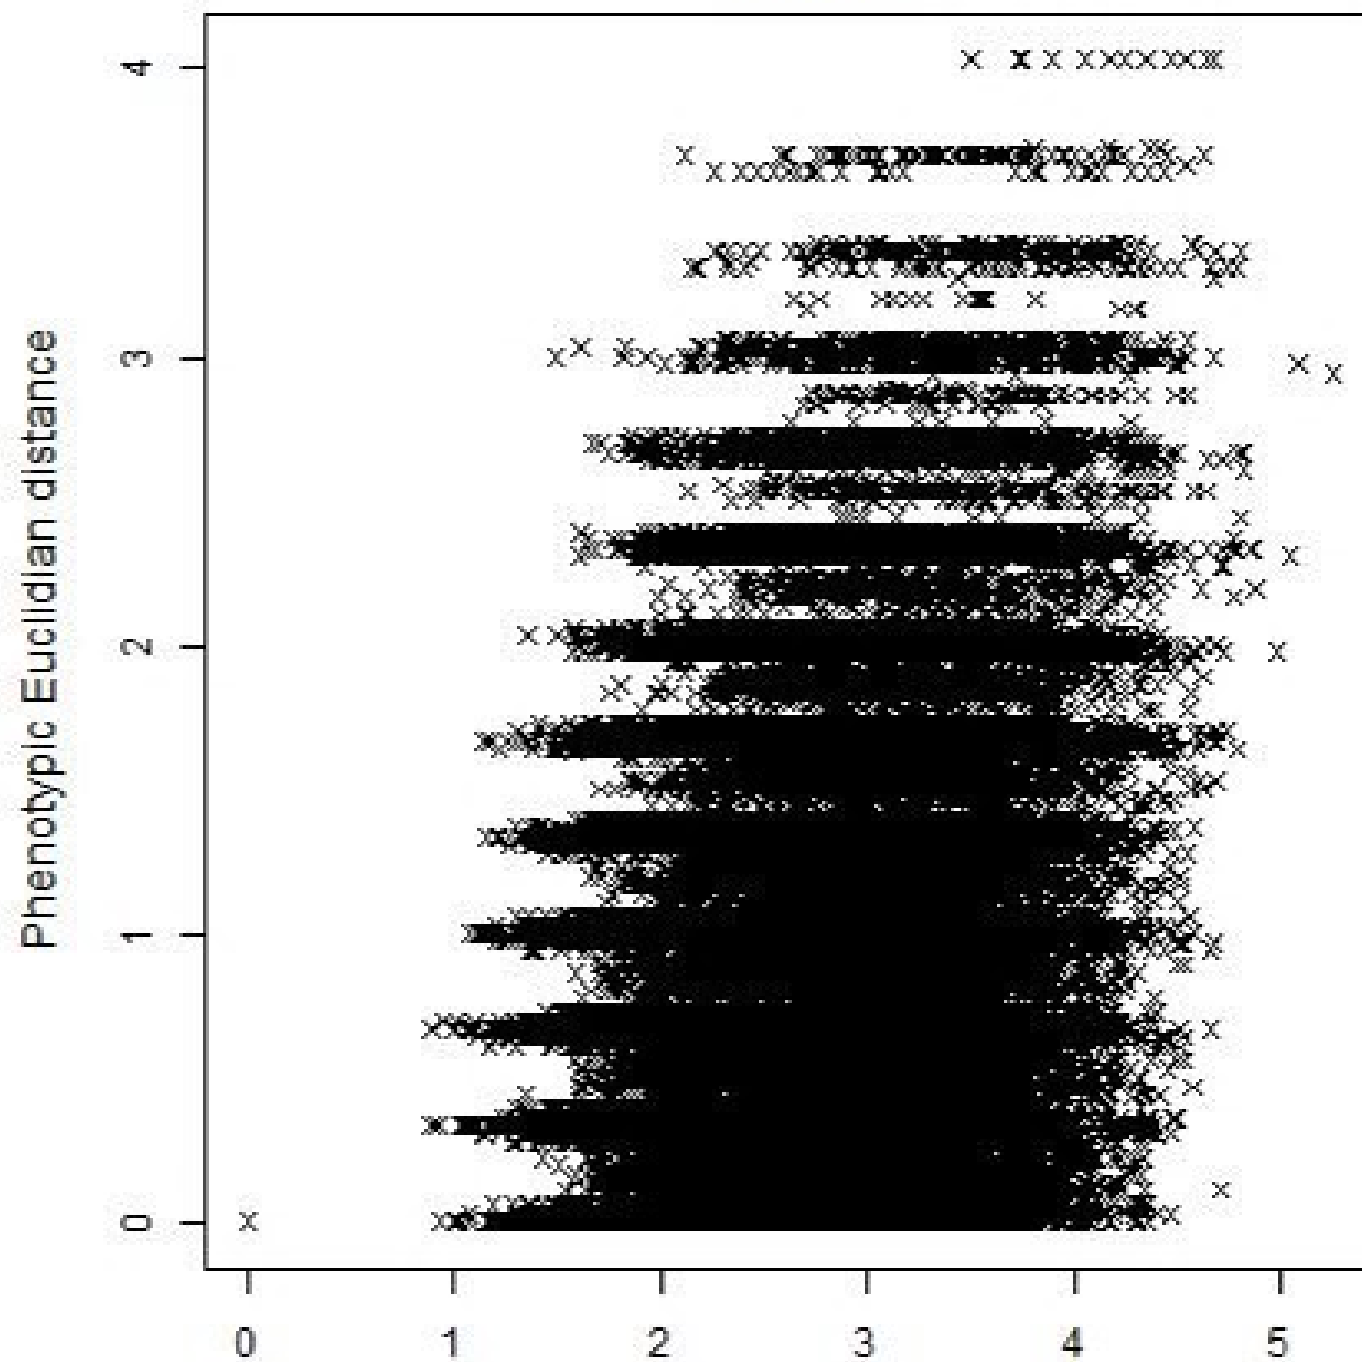

Genetic Euclidian distance (based on the 100 most significantly associated SNPs)



# LMW\_me16

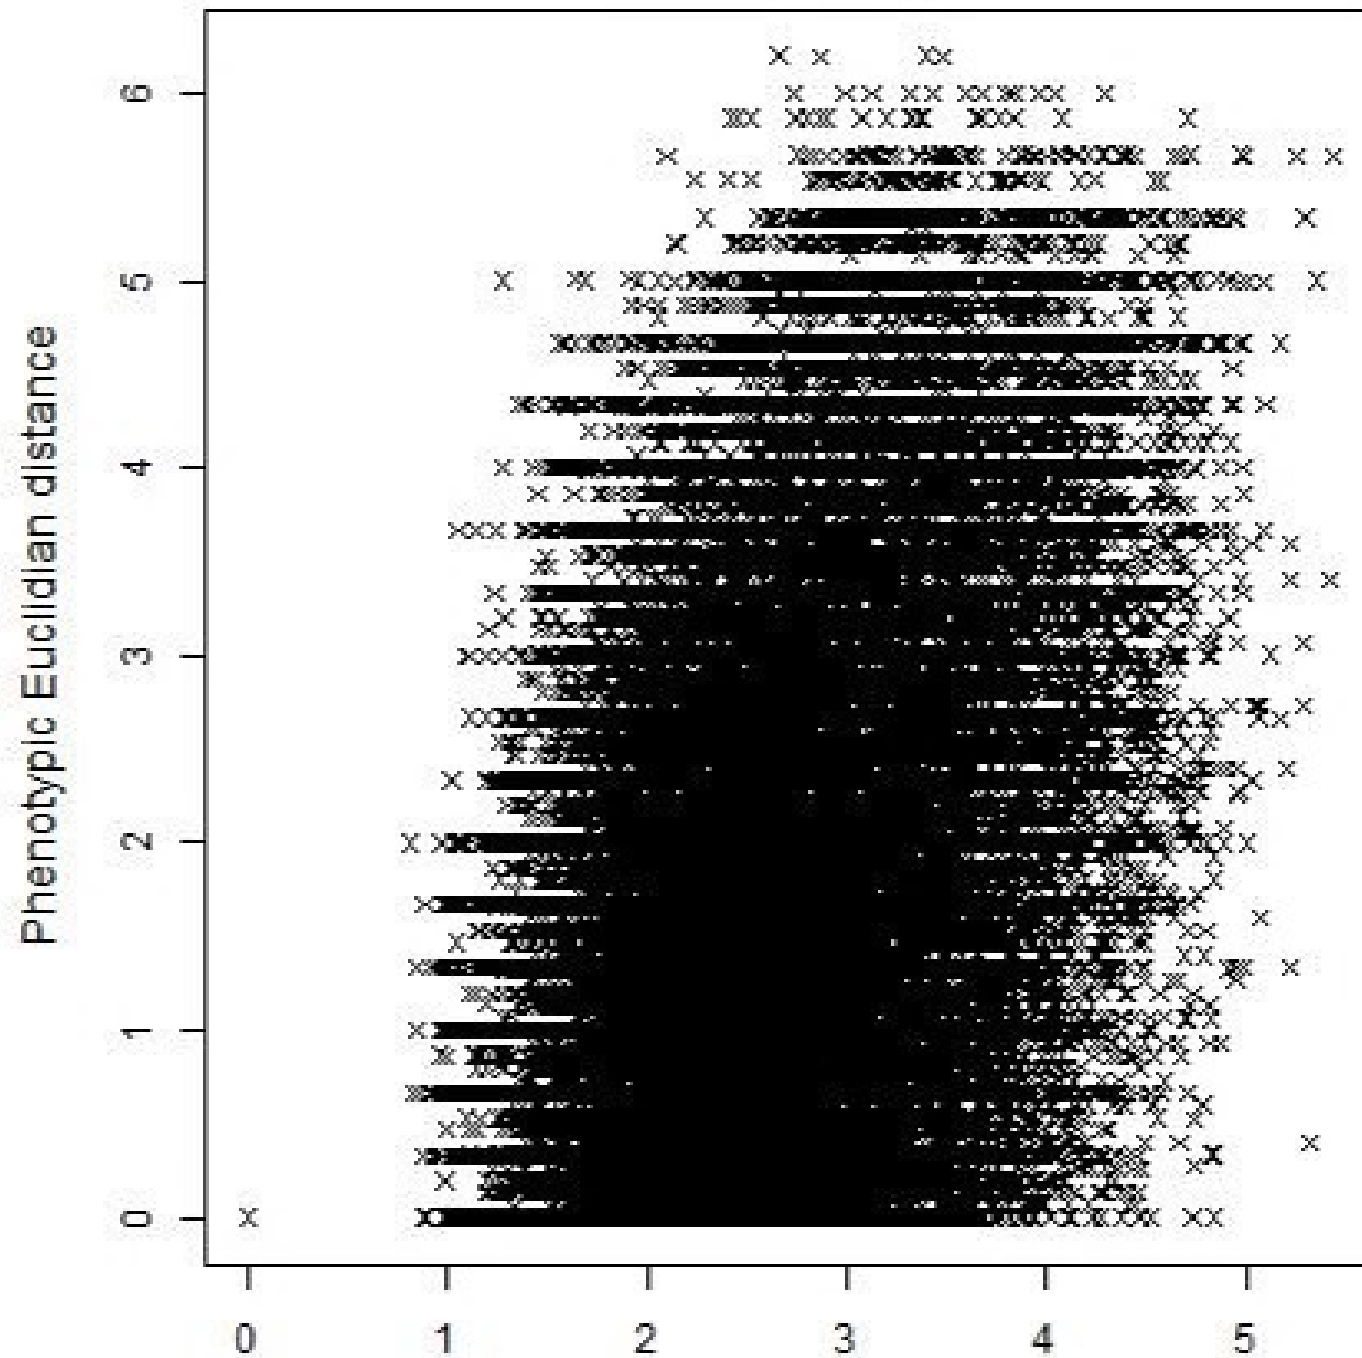

Genetic Euclidian distance (based on the 100 most significantly associated SNPs)

LMW\_po16

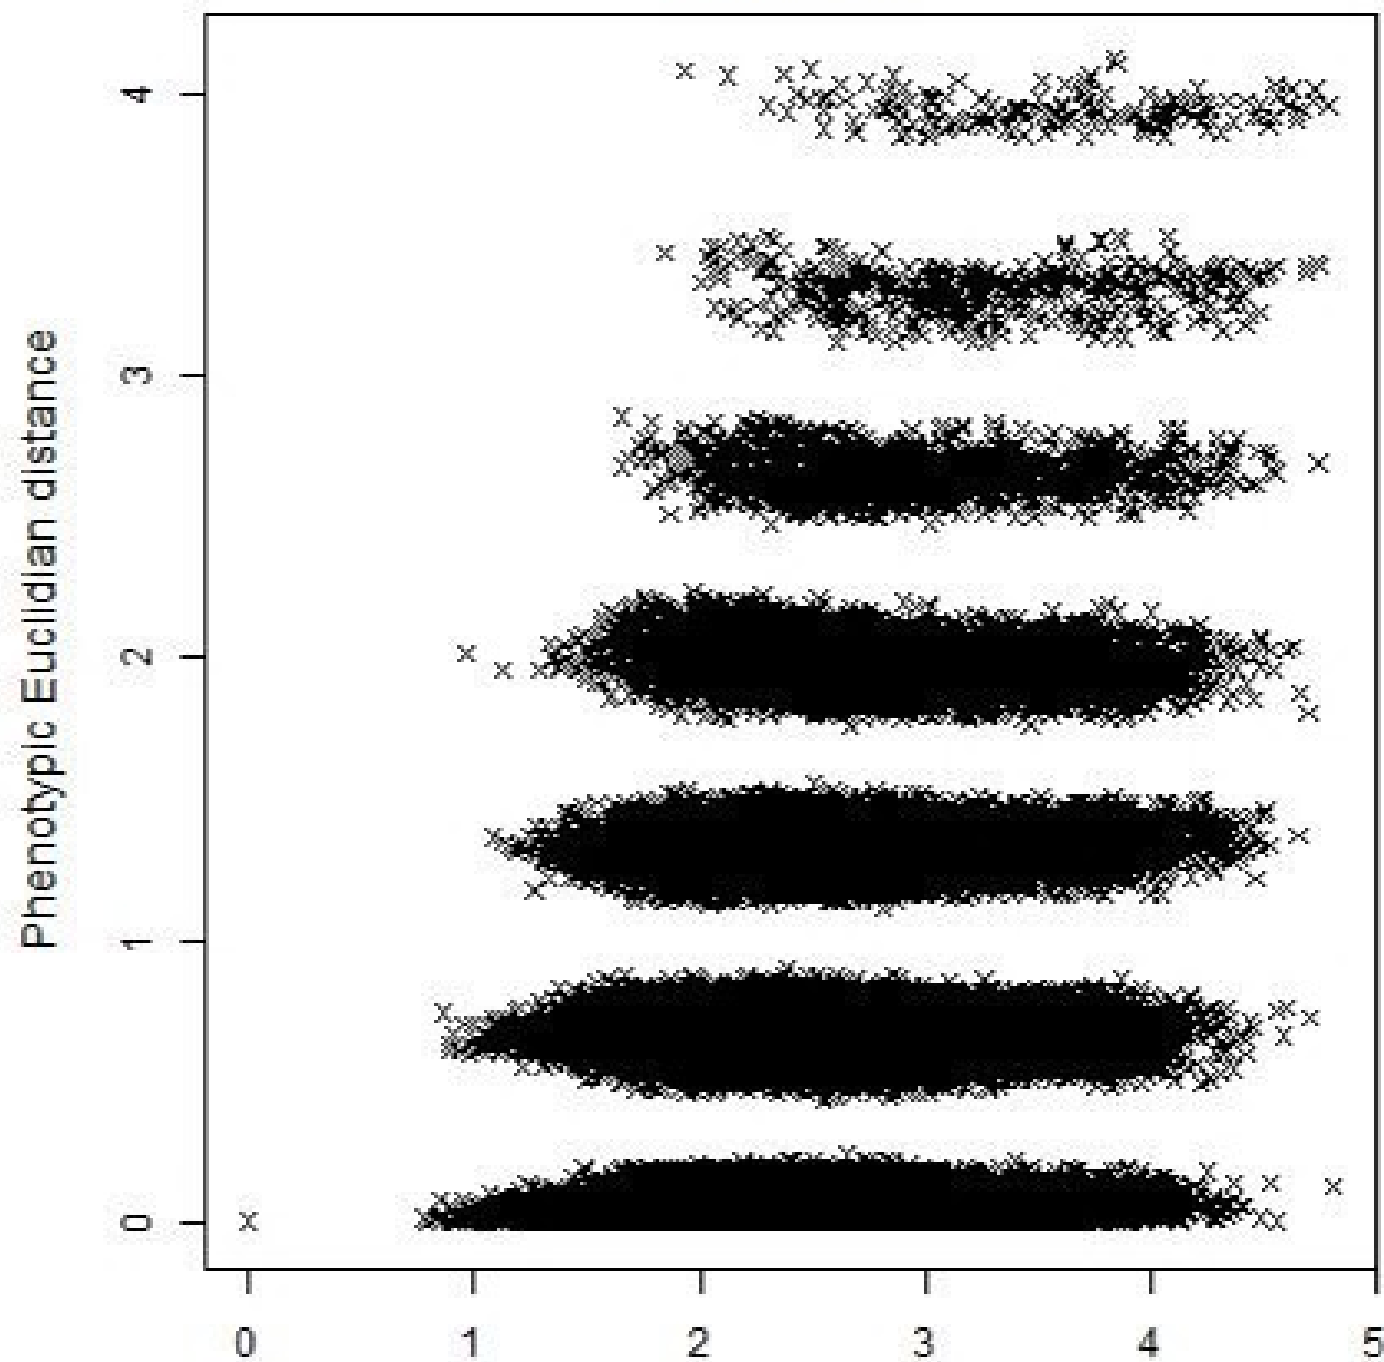

Genetic Euclidian distance (based on the 100 most significantly associated SNPs)

LSL\_lu17

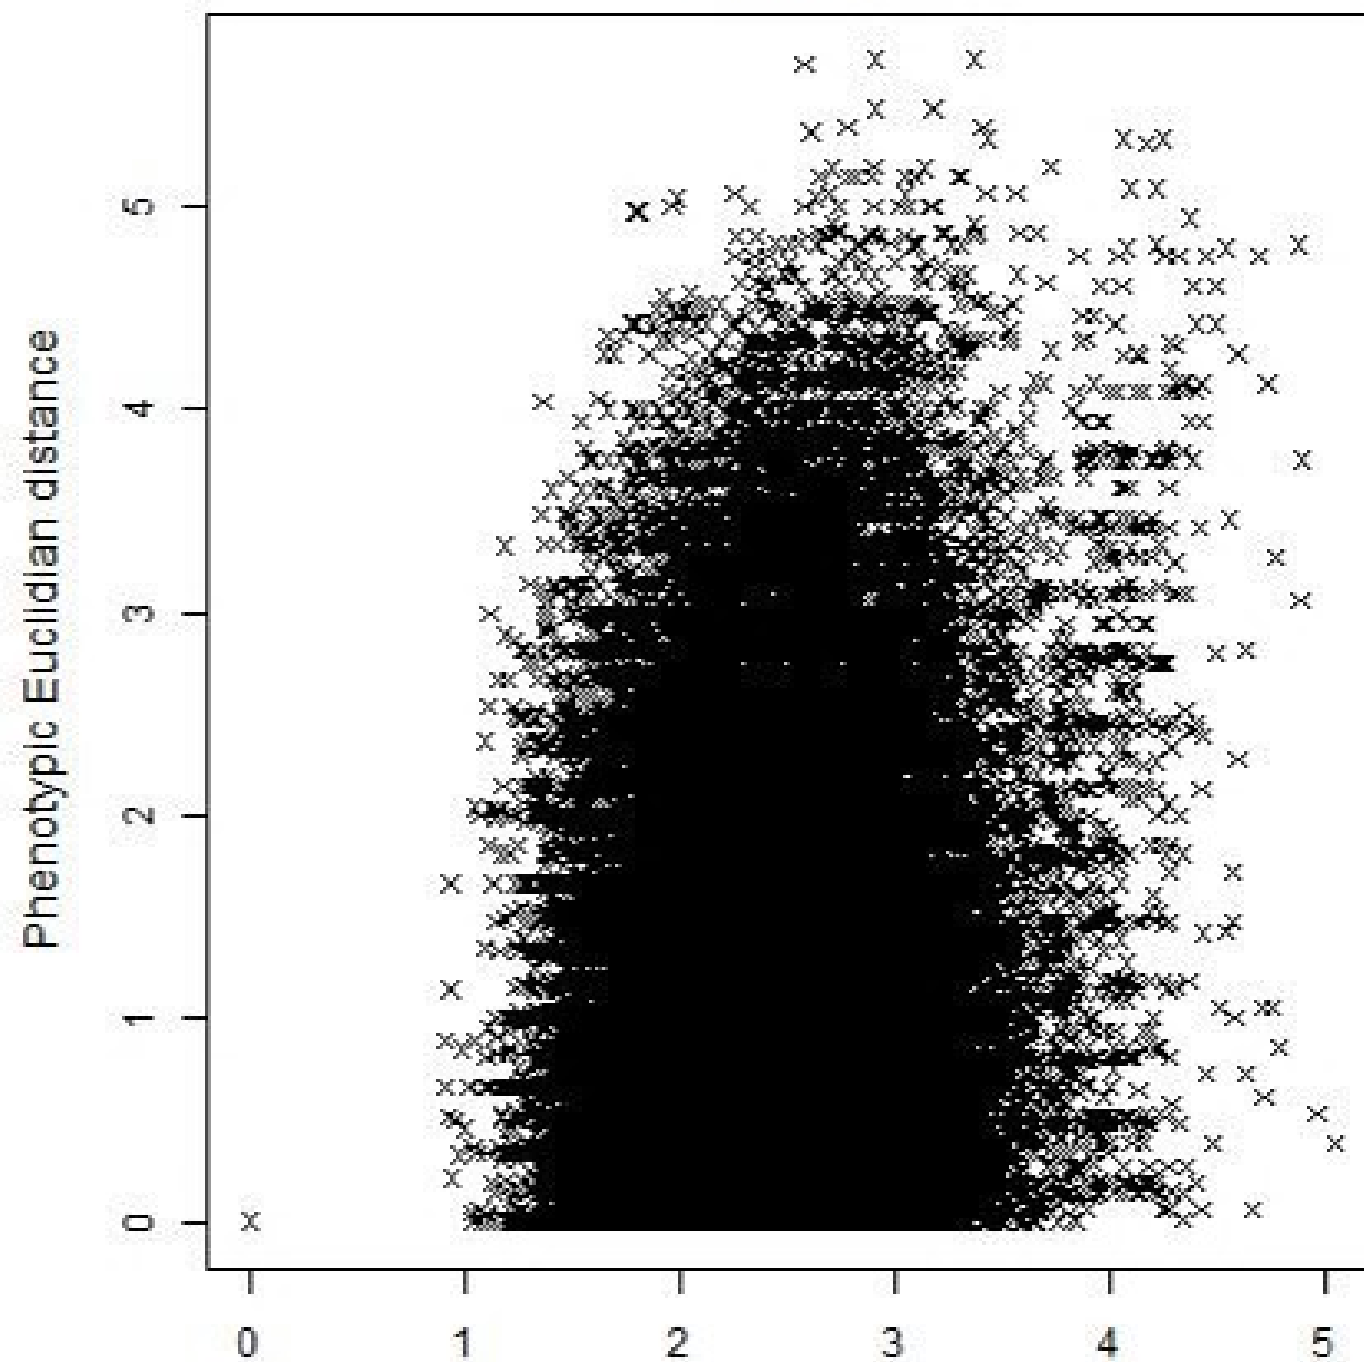

Genetic Euclidian distance (based on the 100 most significantly associated SNPs)

LSP\_lu17

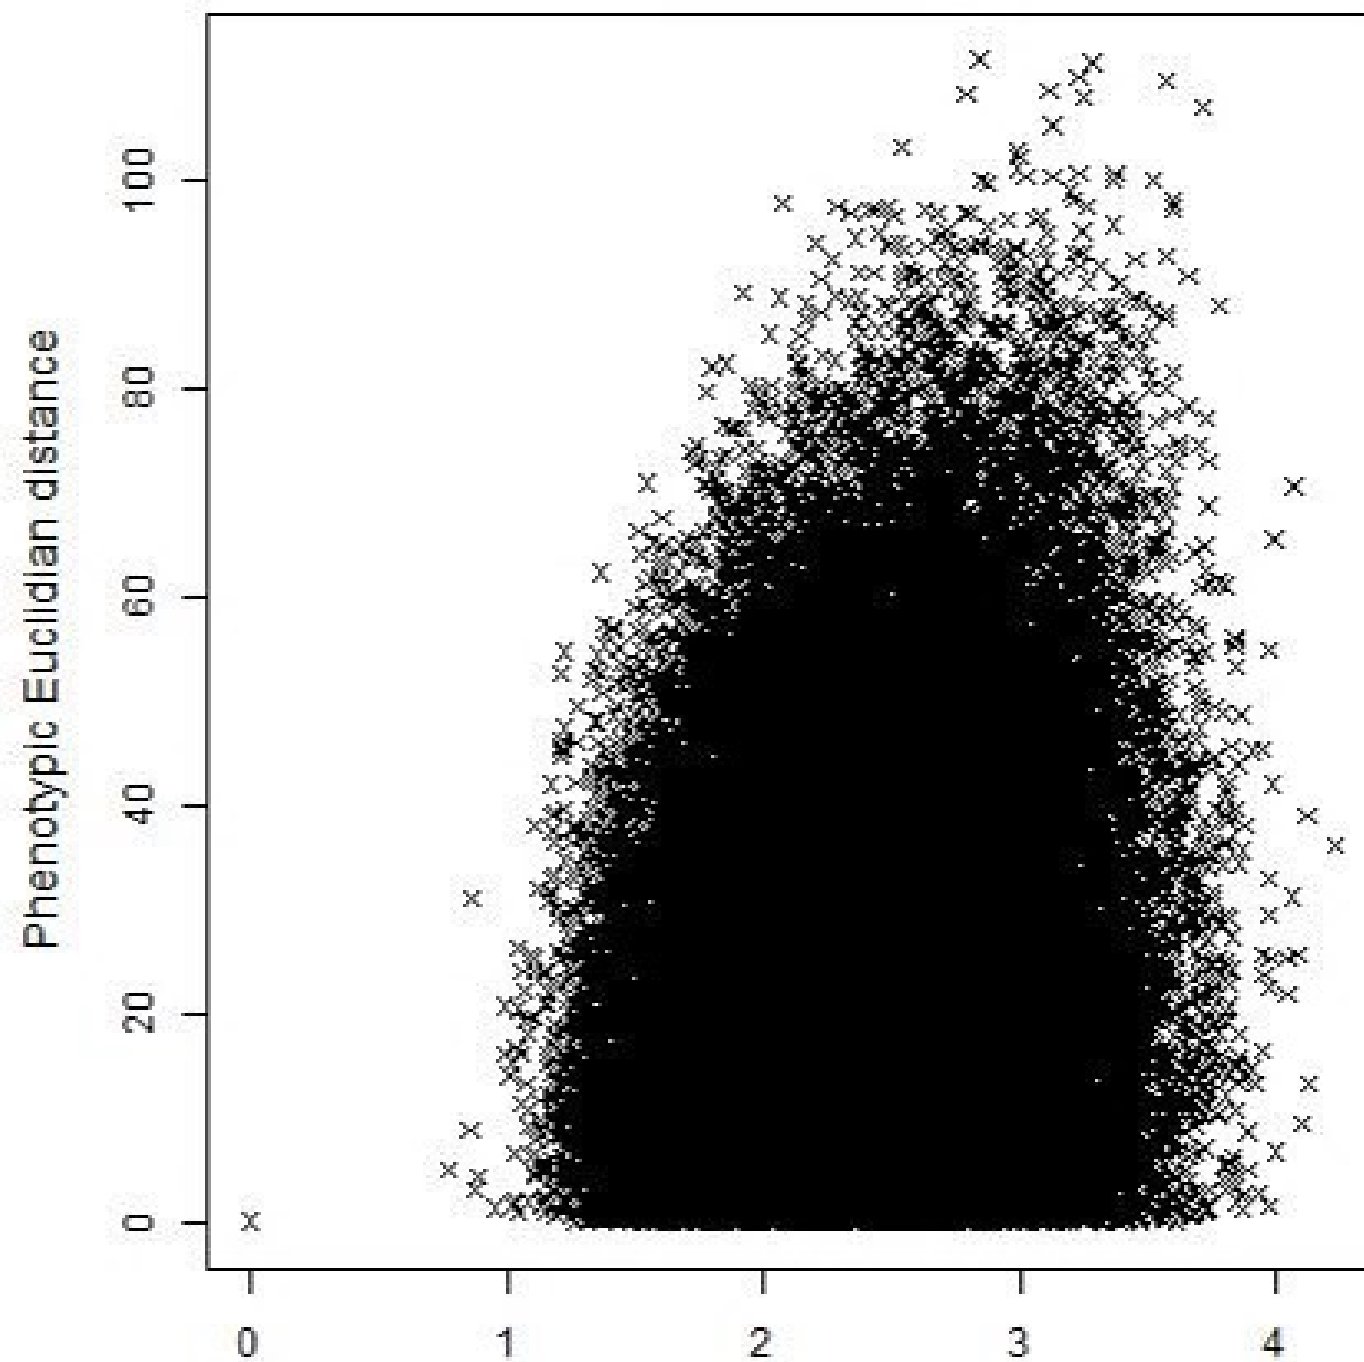

Genetic Euclidian distance (based on the 100 most significantly associated SNPs)

NDF\_04\_me17

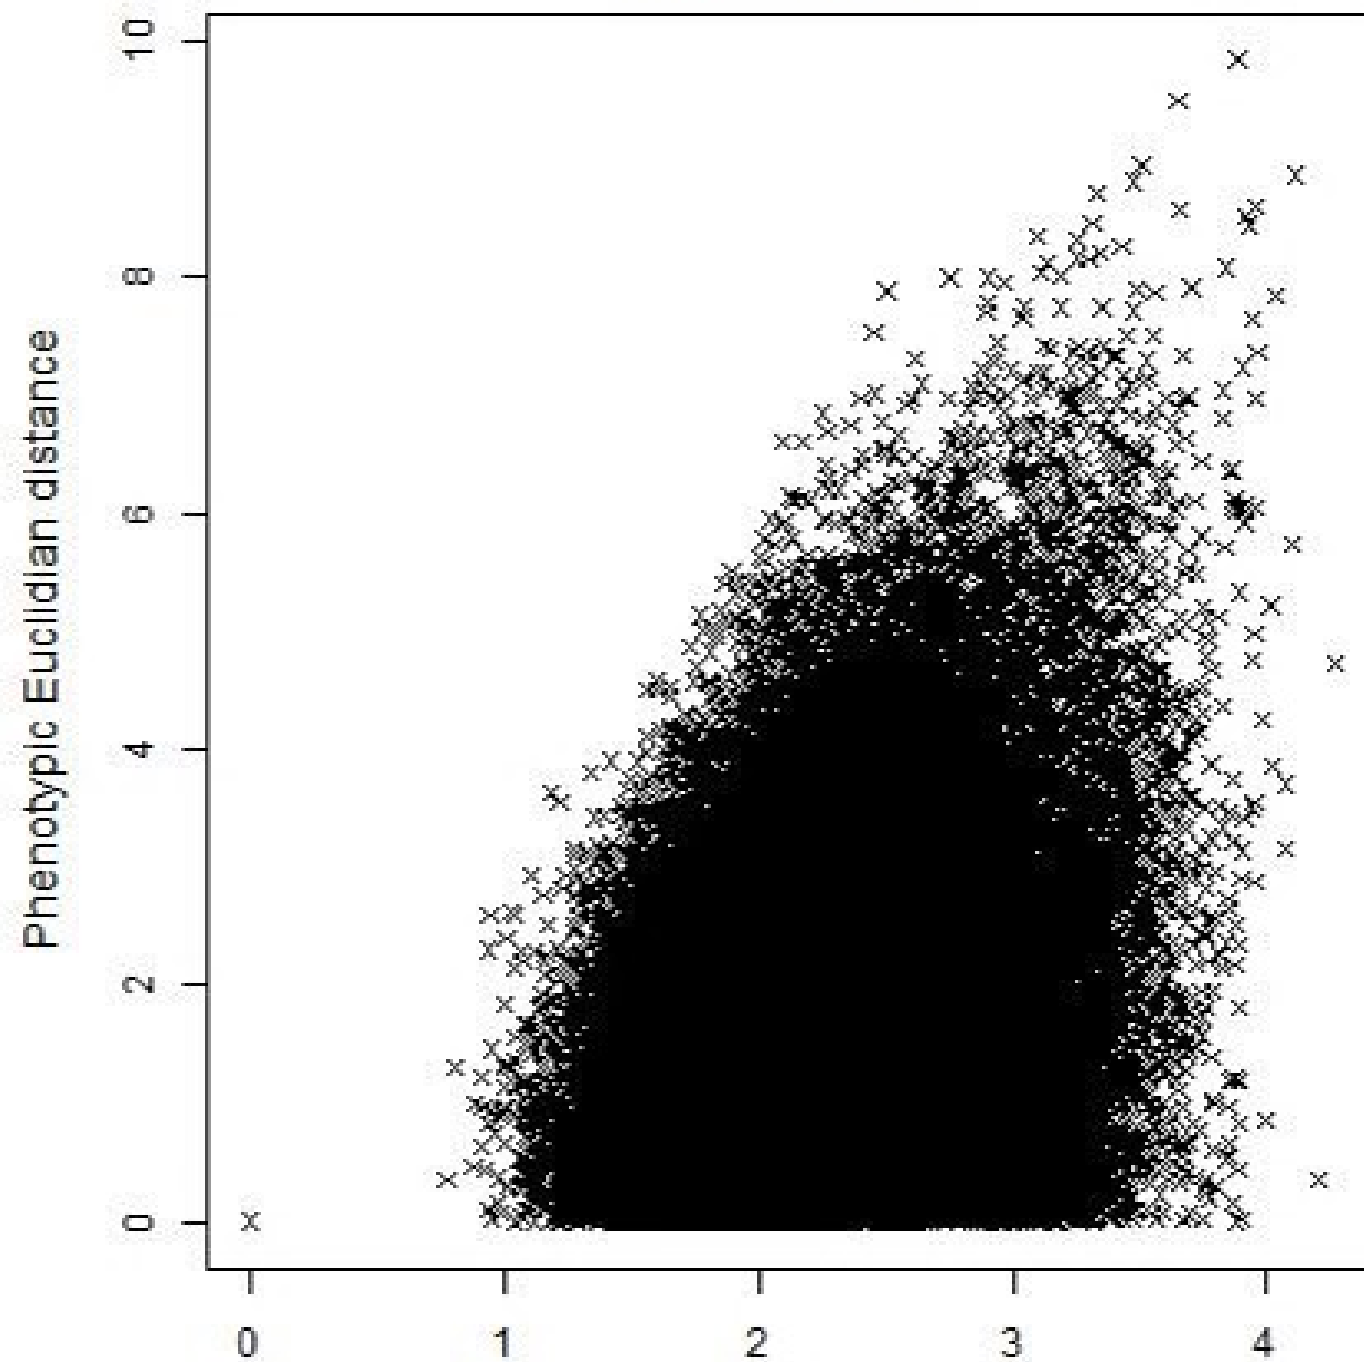

Genetic Euclidian distance (based on the 100 most significantly associated SNPs)

NDF\_10\_lu17

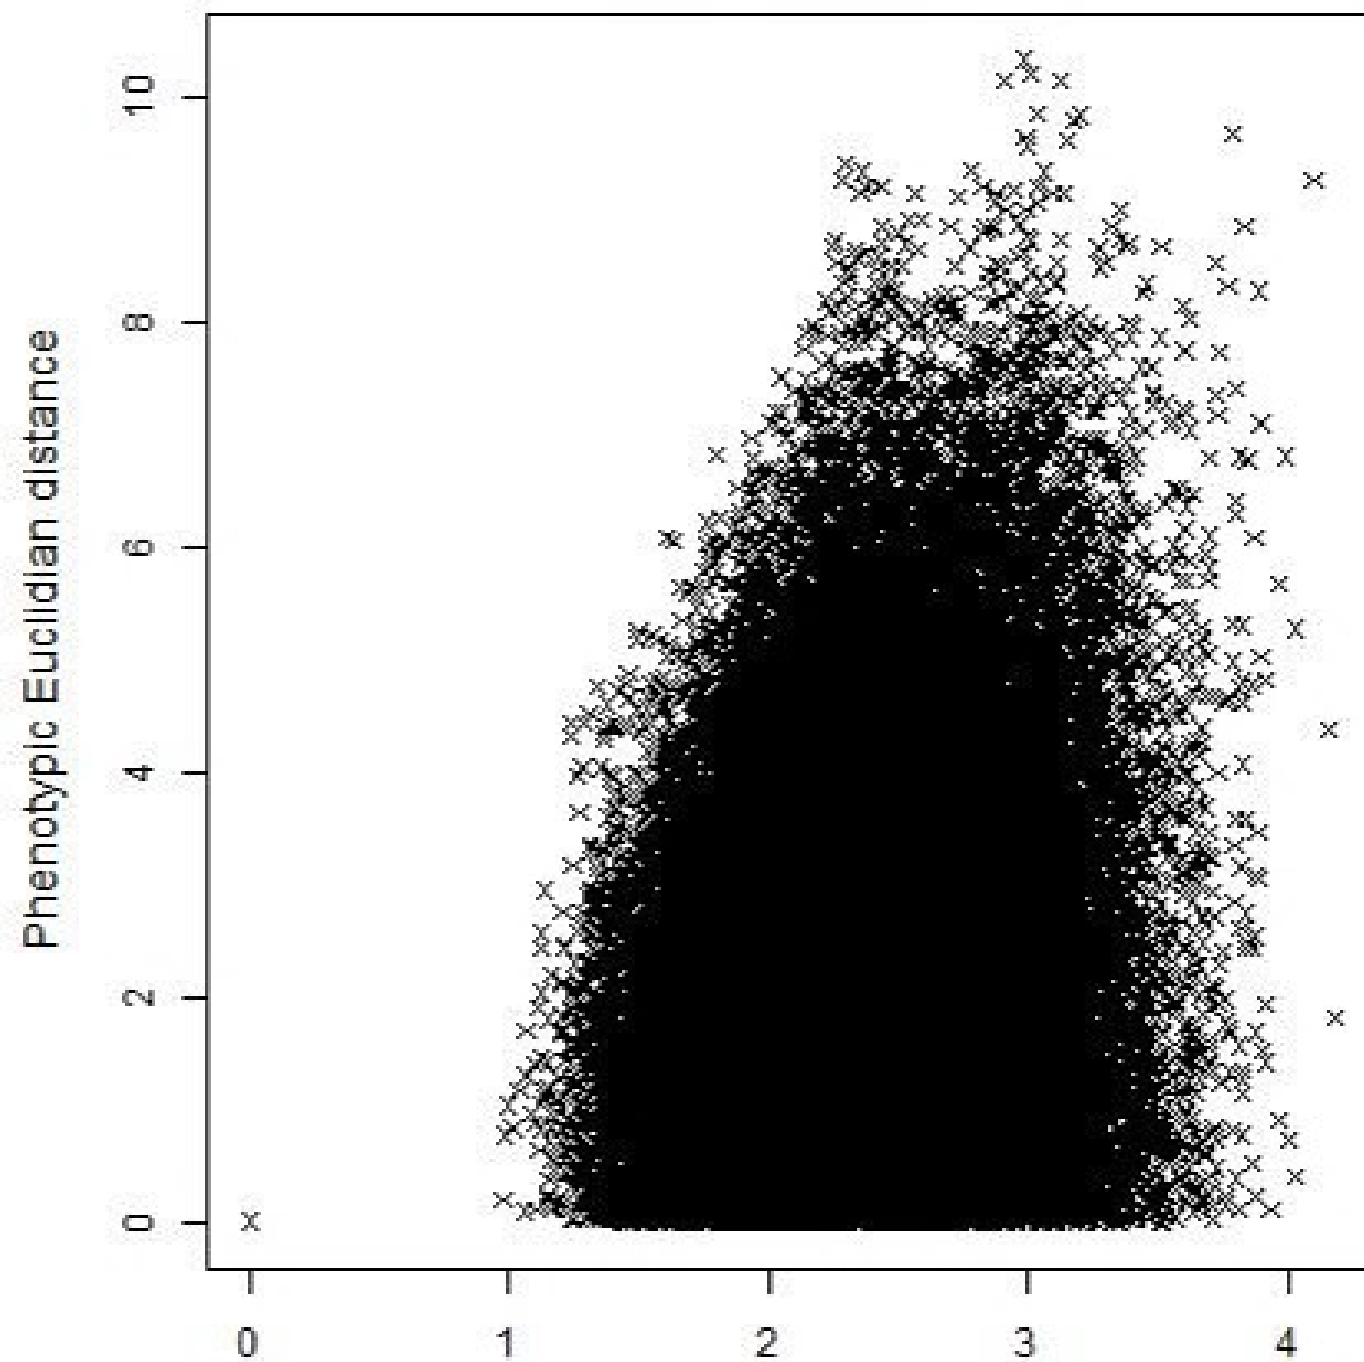

Genetic Euclidian distance (based on the 100 most significantly associated SNPs)

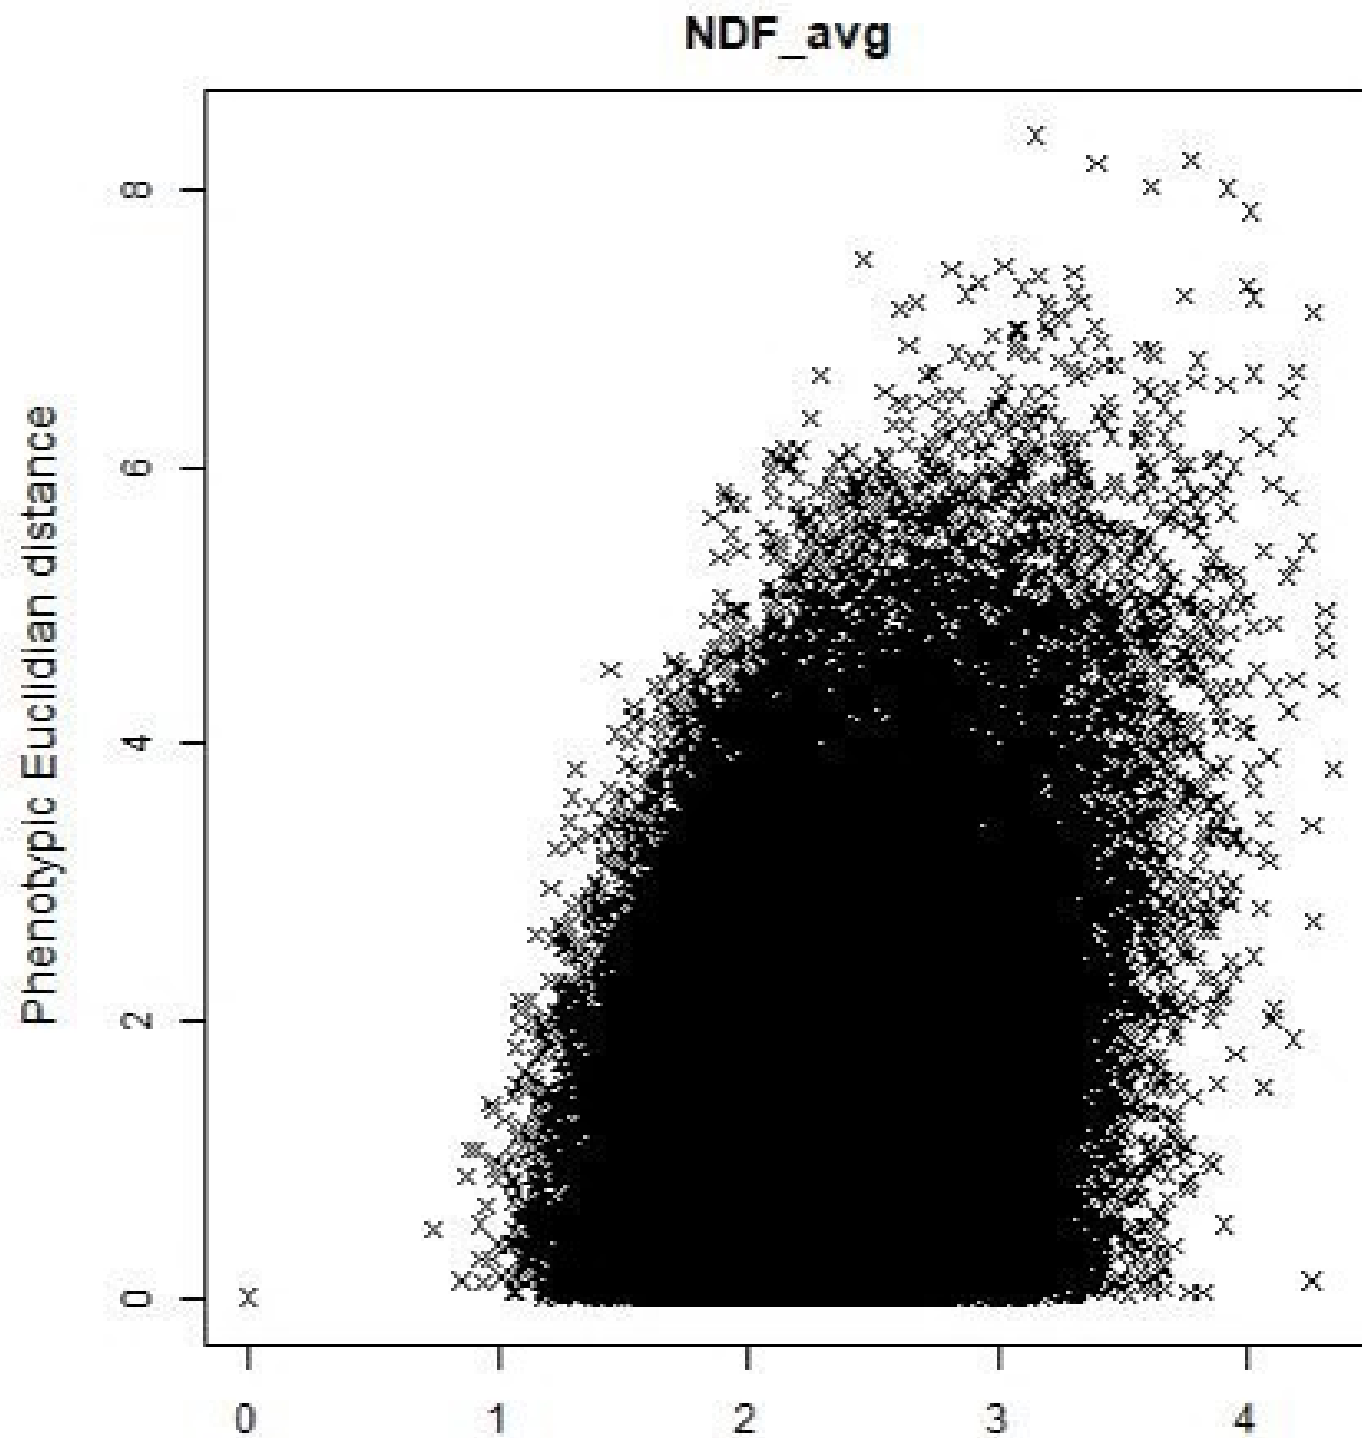

Genetic Euclidian distance (based on the 100 most significantly associated SNPs)

NLI\_lu16

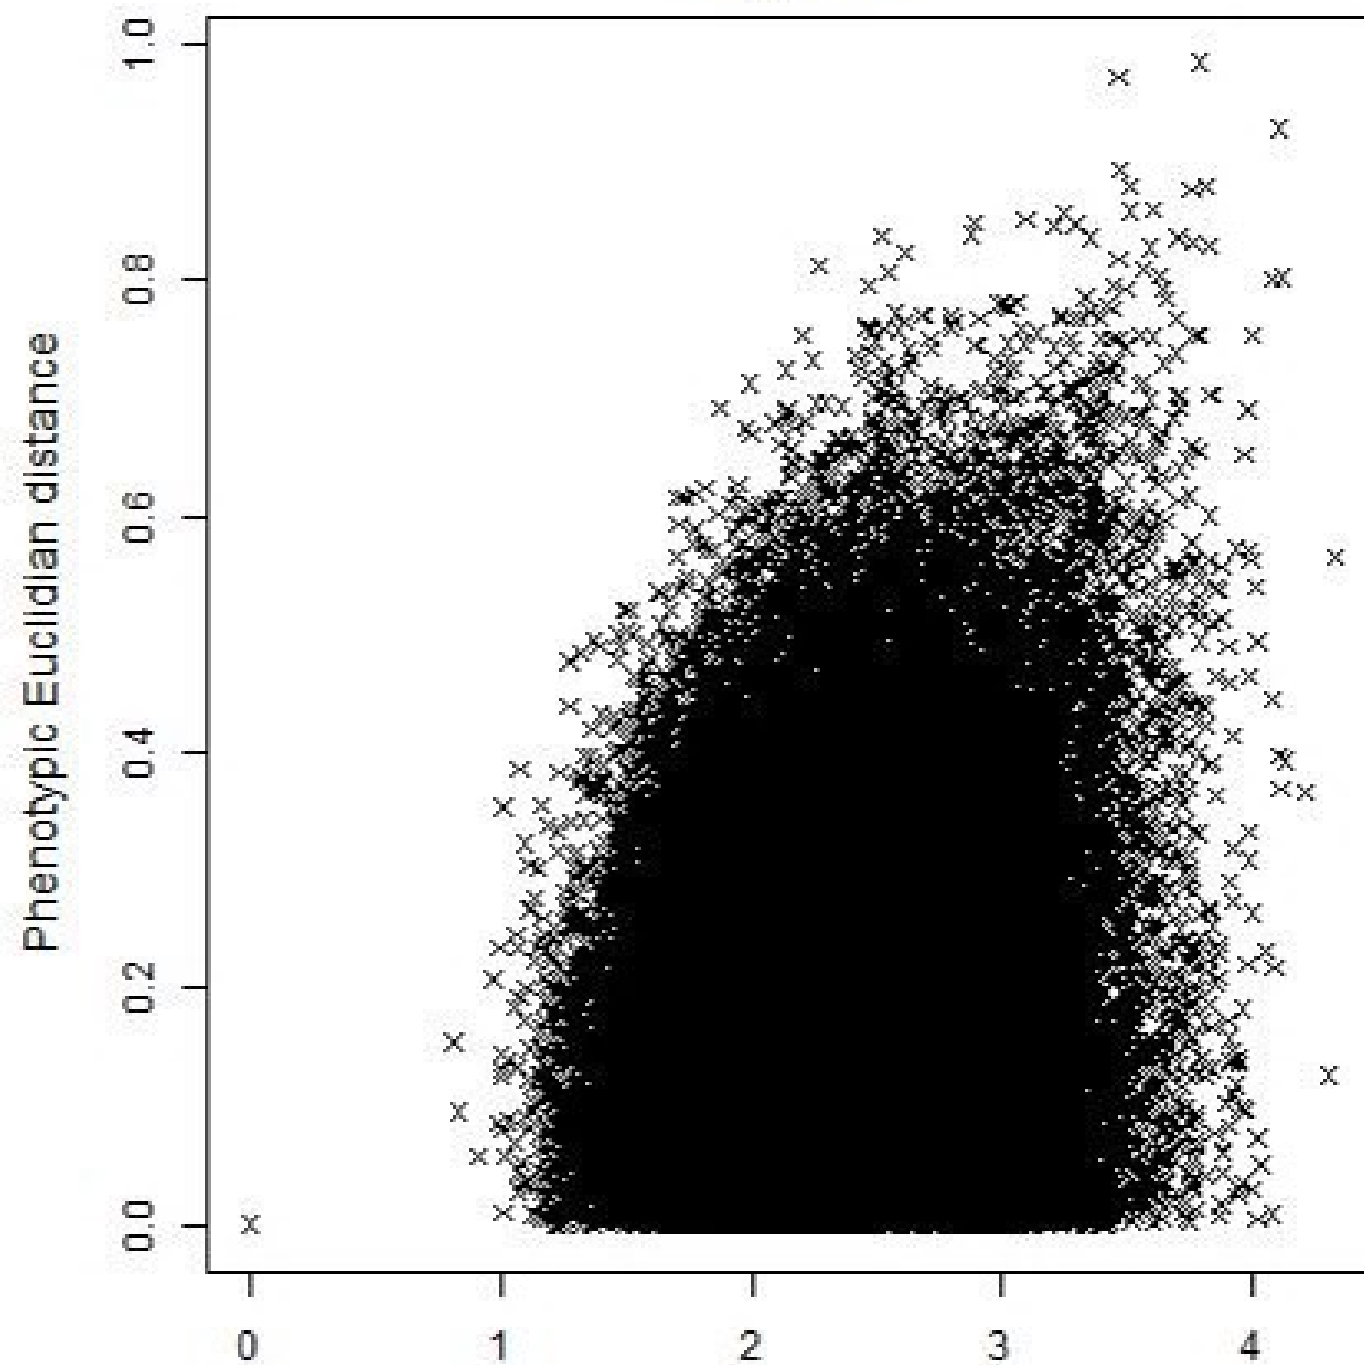

Genetic Euclidian distance (based on the 100 most significantly associated SNPs)



NSL\_lu17

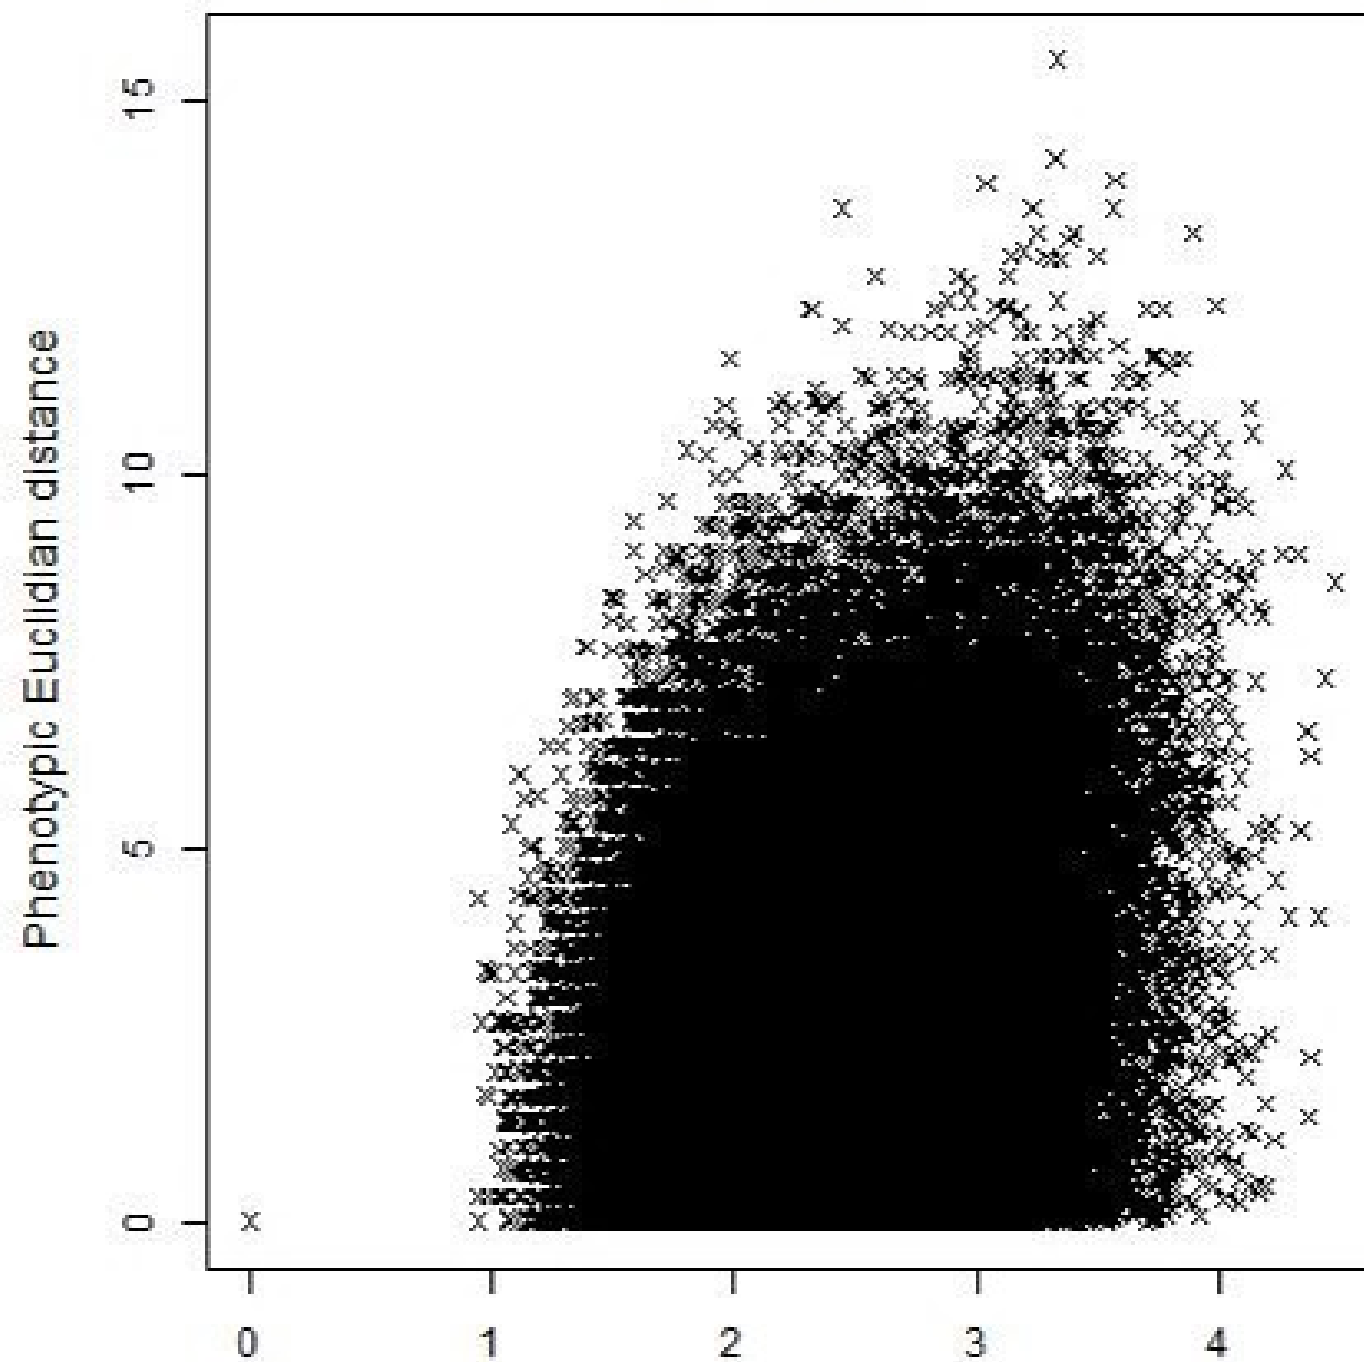

Genetic Euclidian distance (based on the 100 most significantly associated SNPs)

OMD\_04\_me17

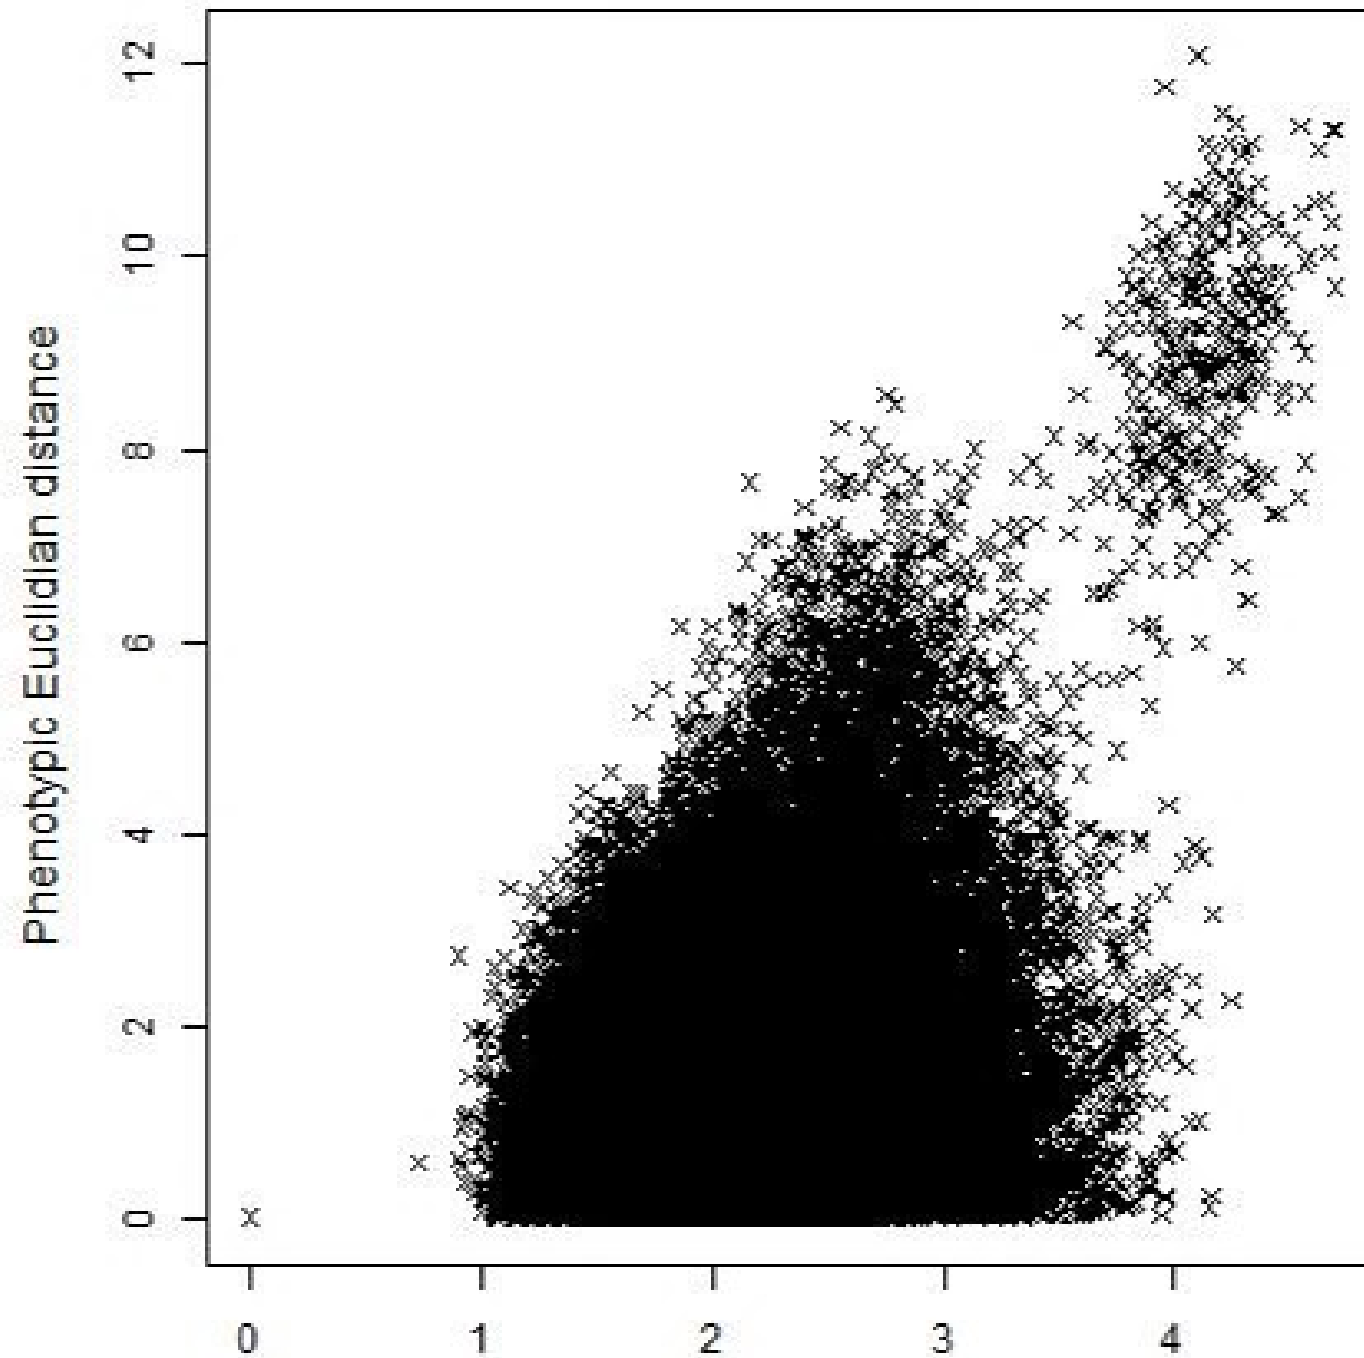

Genetic Euclidian distance (based on the 100 most significantly associated SNPs)

OMD\_10\_me17

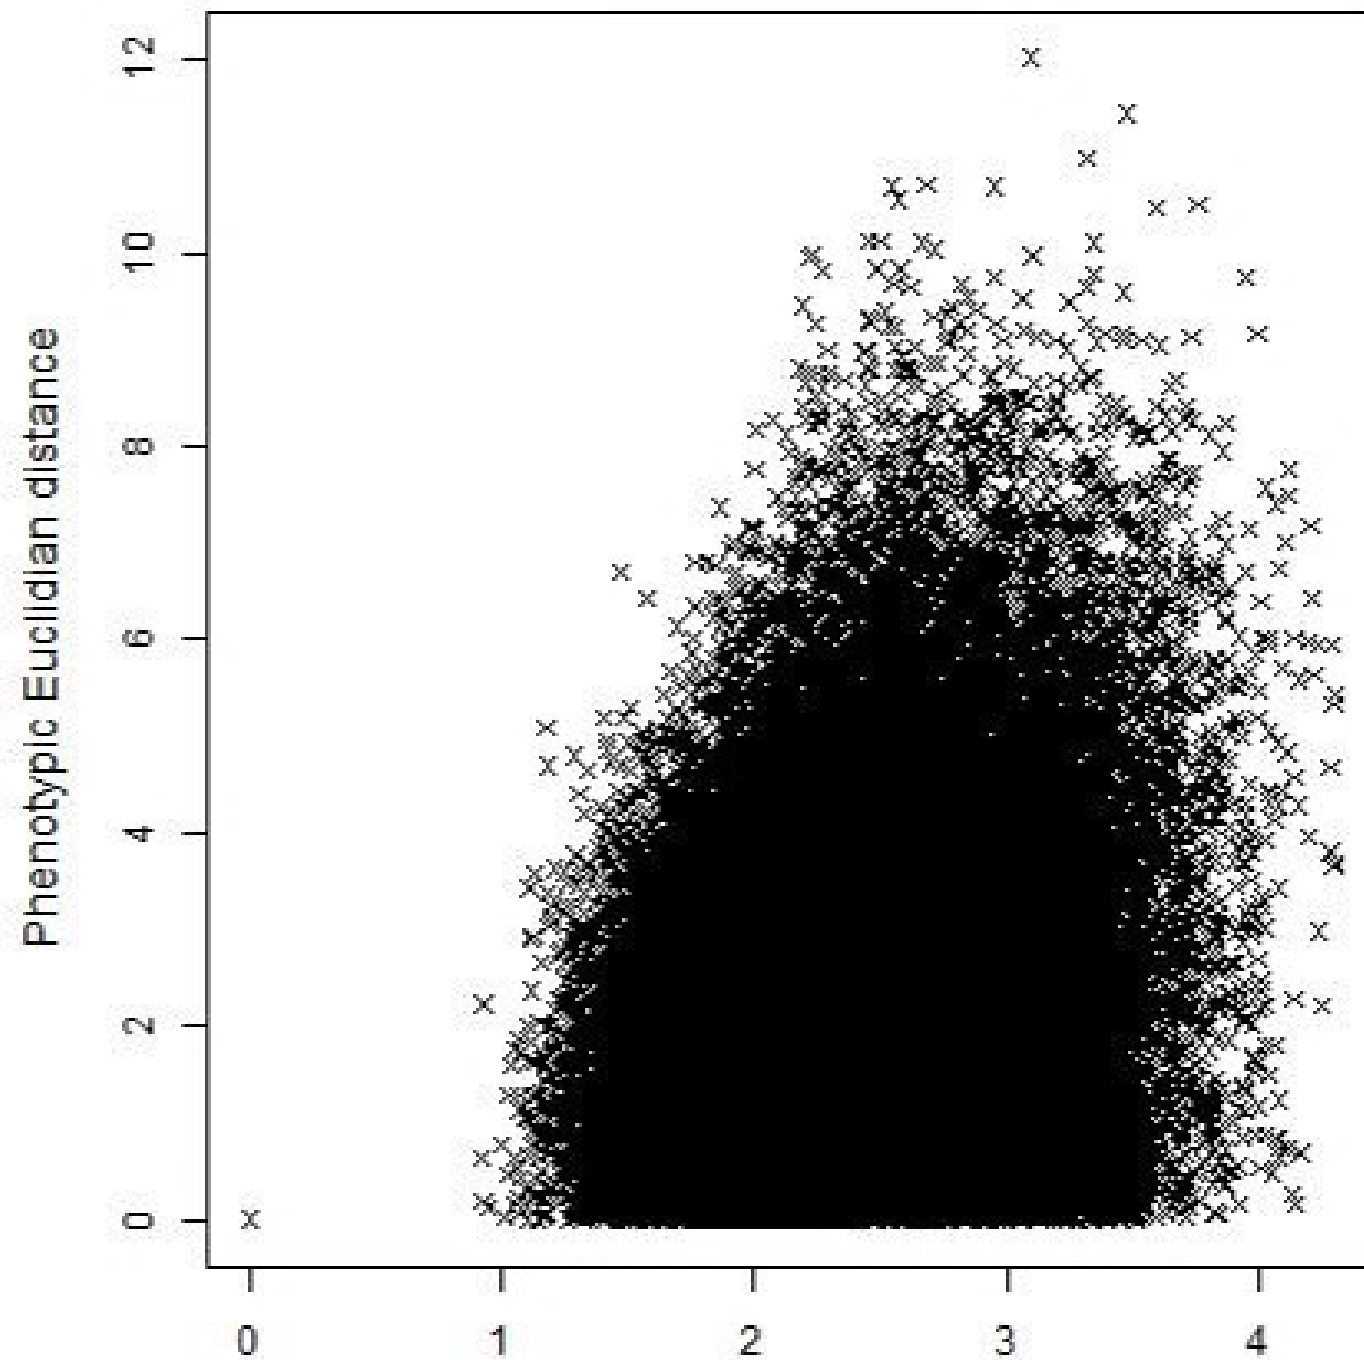

Genetic Euclidian distance (based on the 100 most significantly associated SNPs)

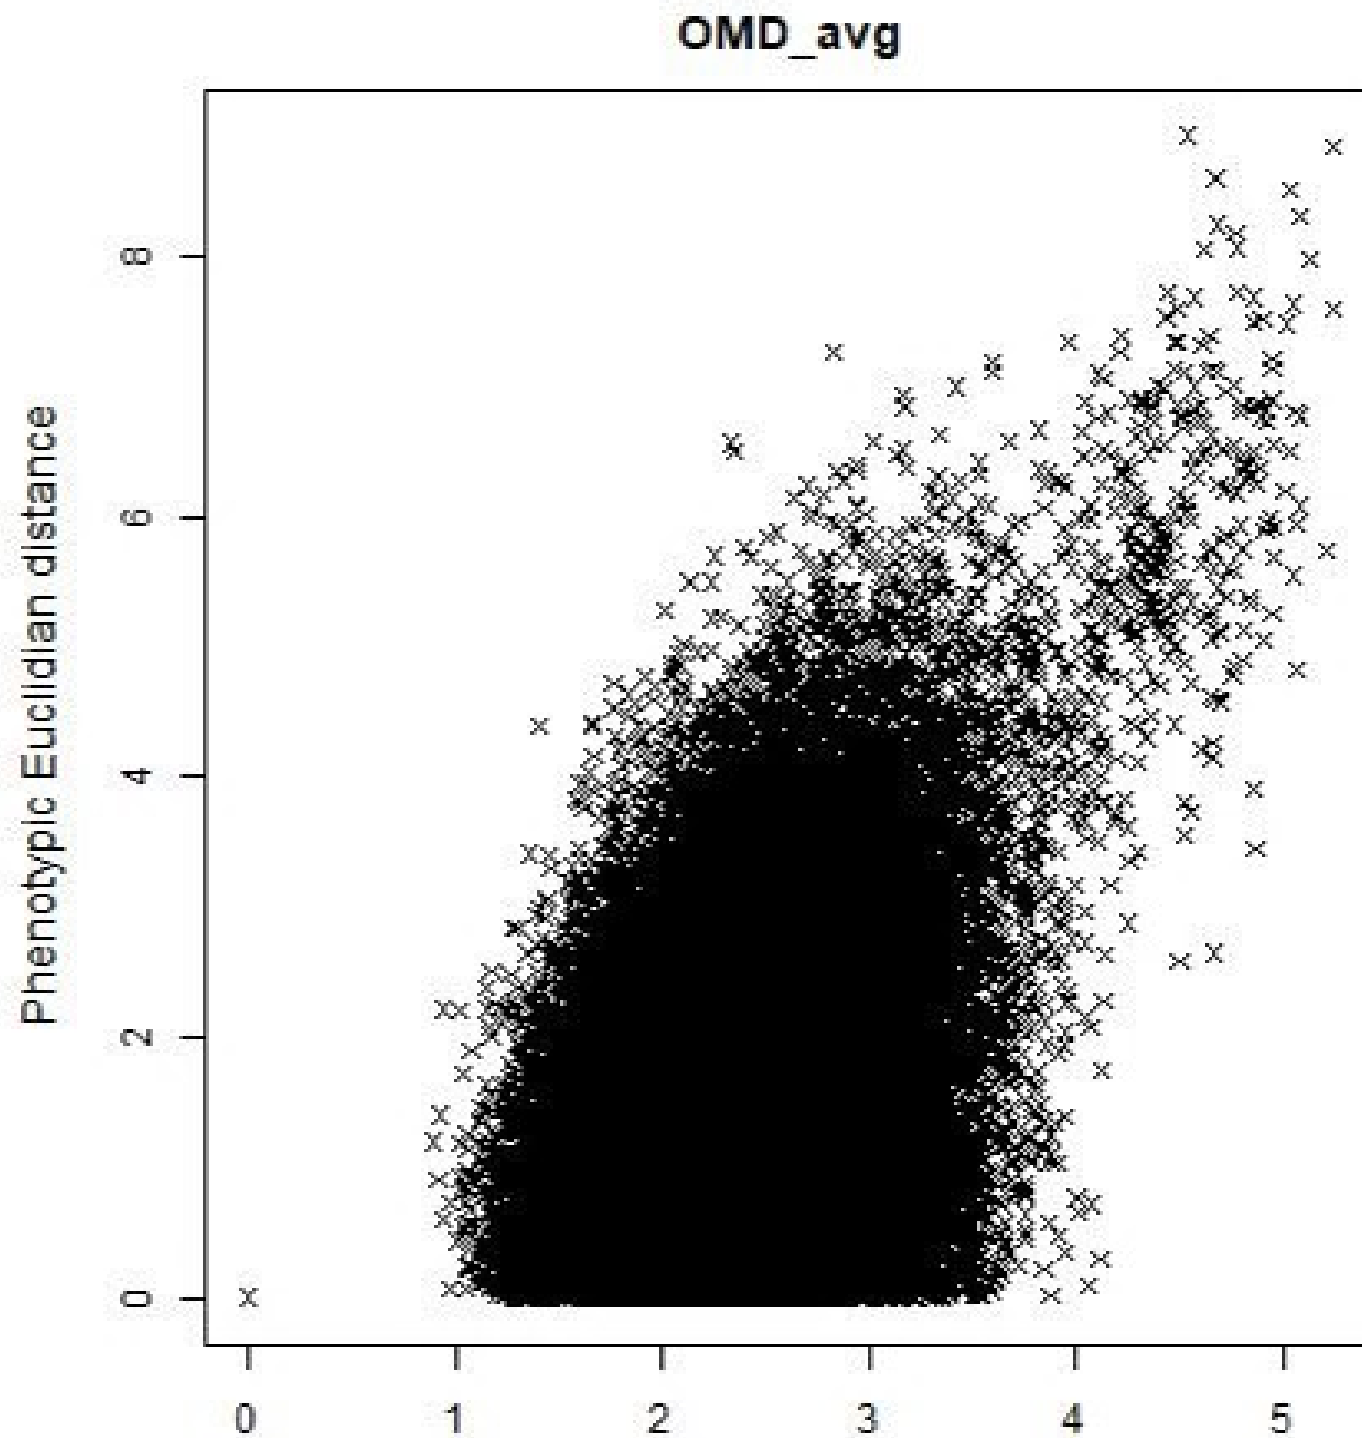

Genetic Euclidian distance (based on the 100 most significantly associated SNPs)

PRT\_04\_me17

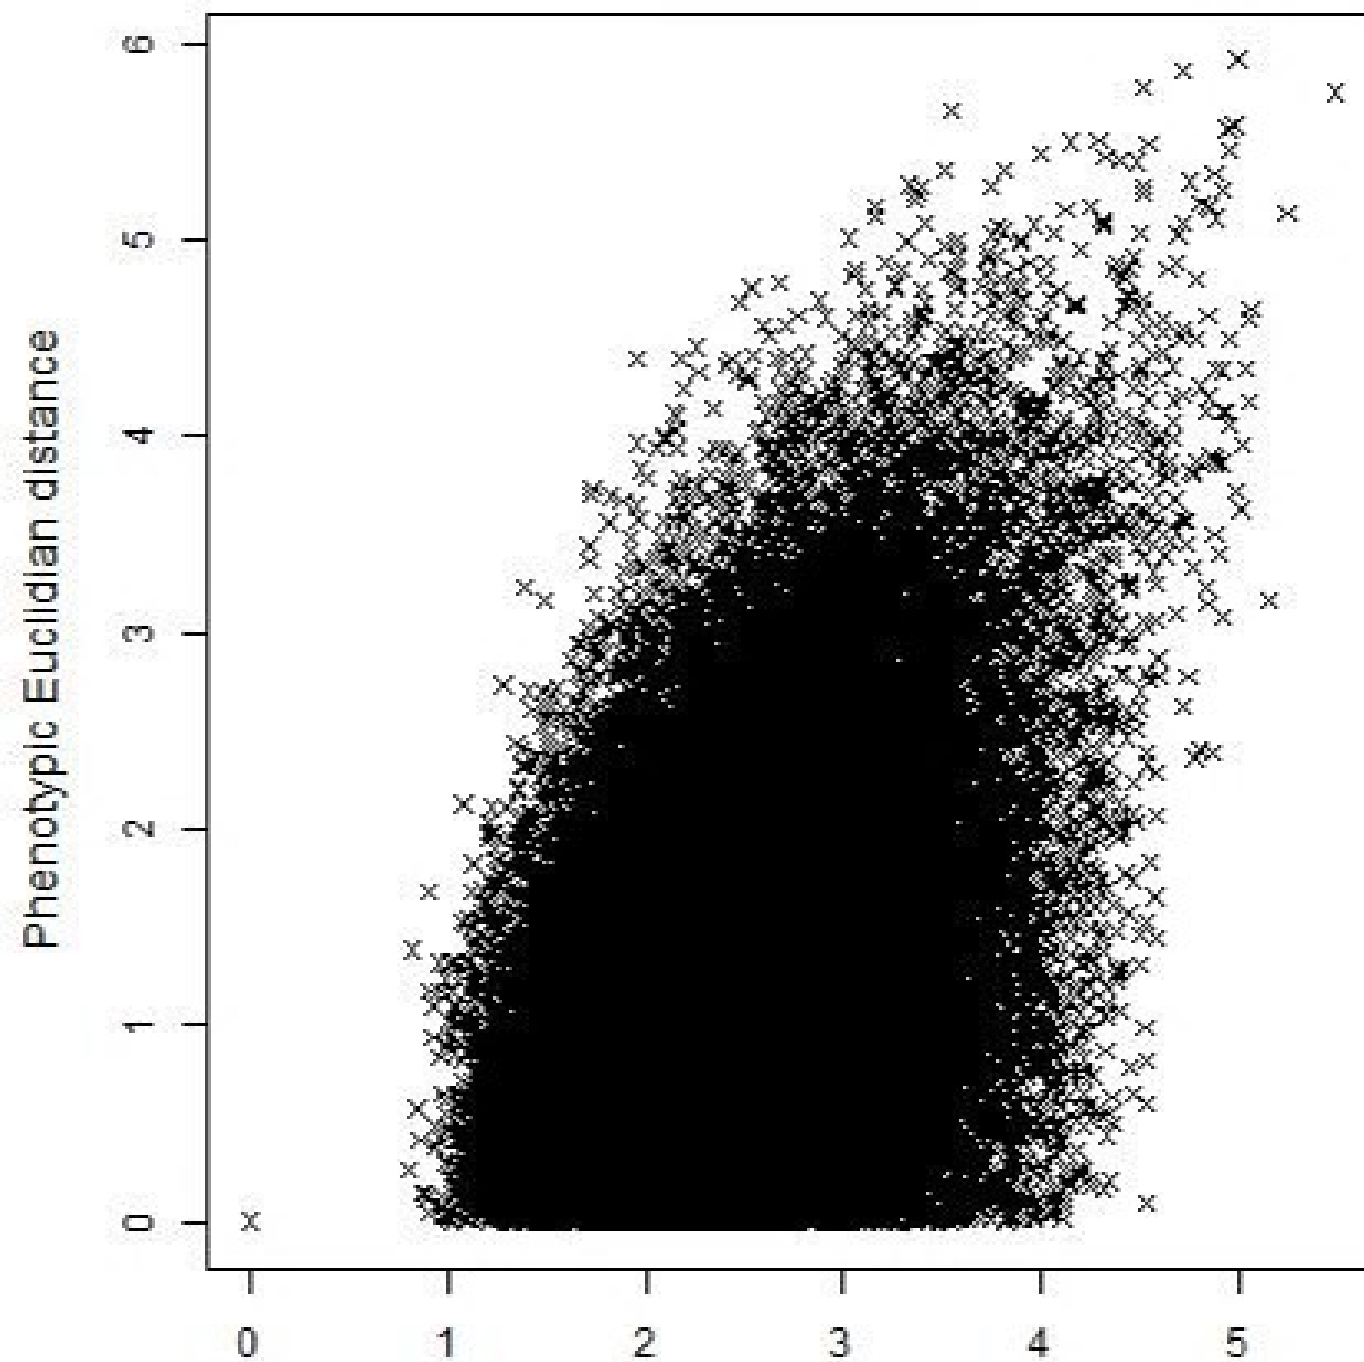

Genetic Euclidian distance (based on the 100 most significantly associated SNPs)

PRT\_10\_me17

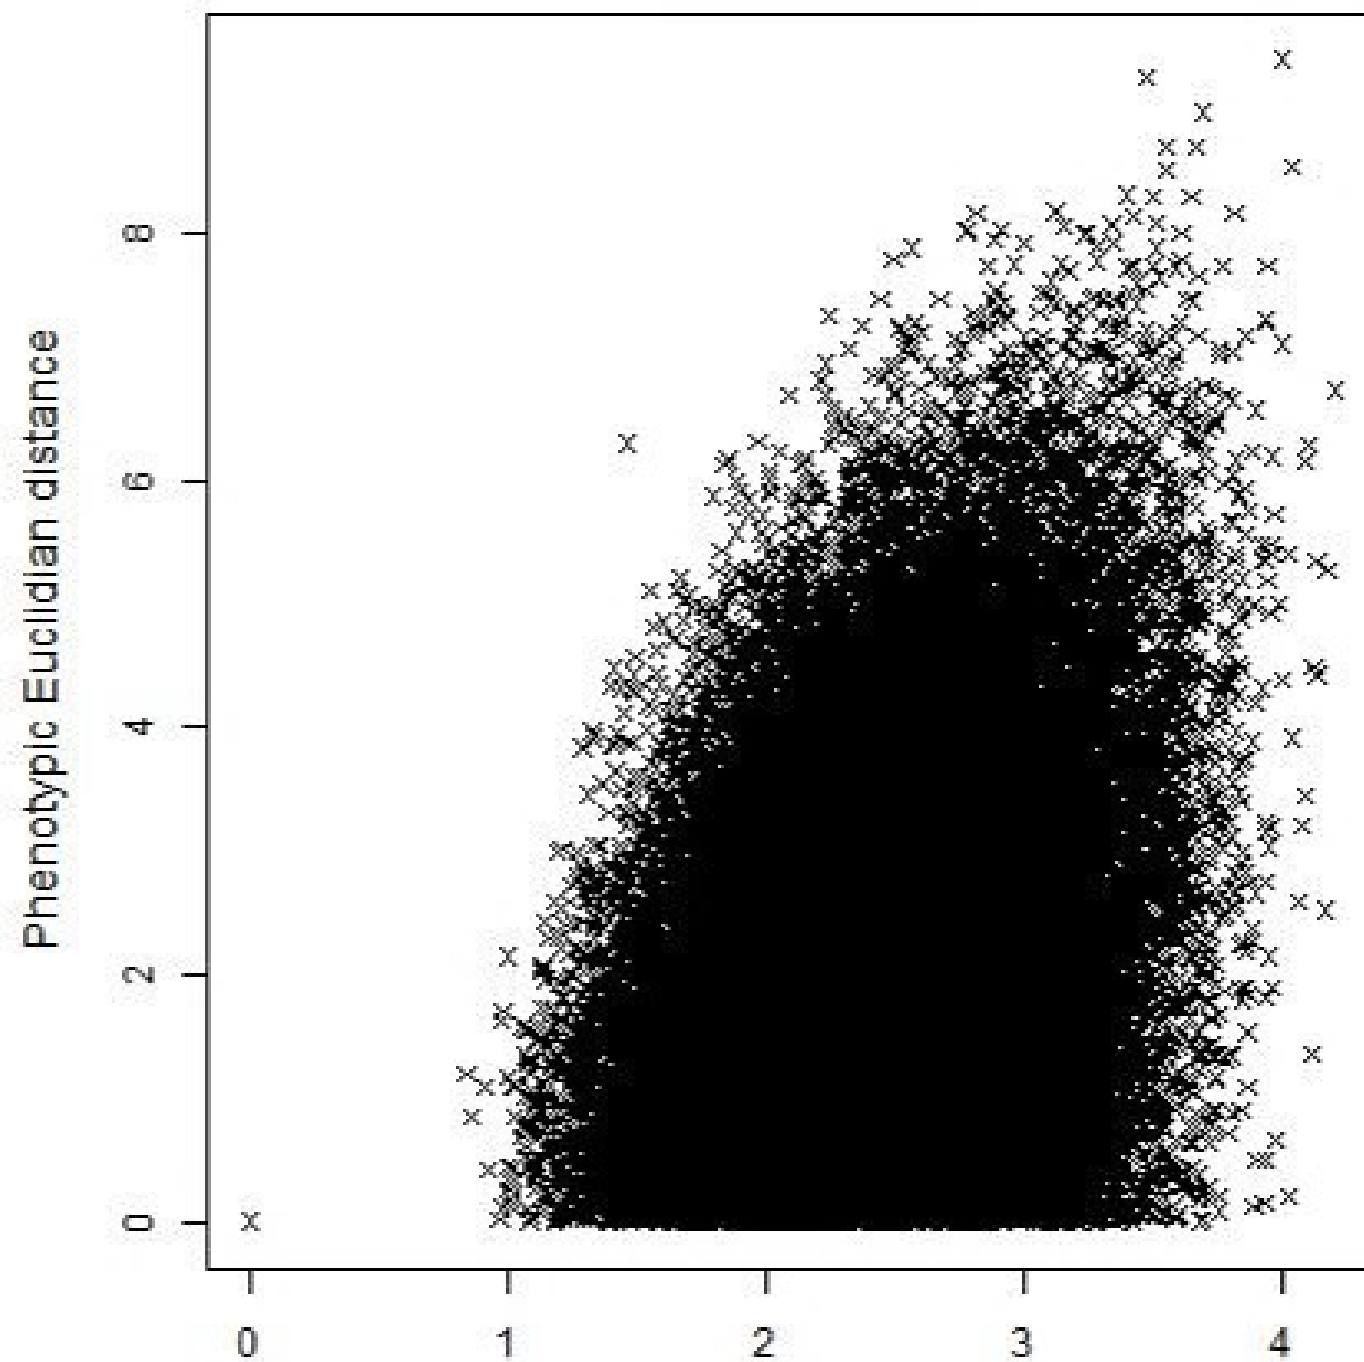

Genetic Euclidian distance (based on the 100 most significantly associated SNPs)

PRT\_avg

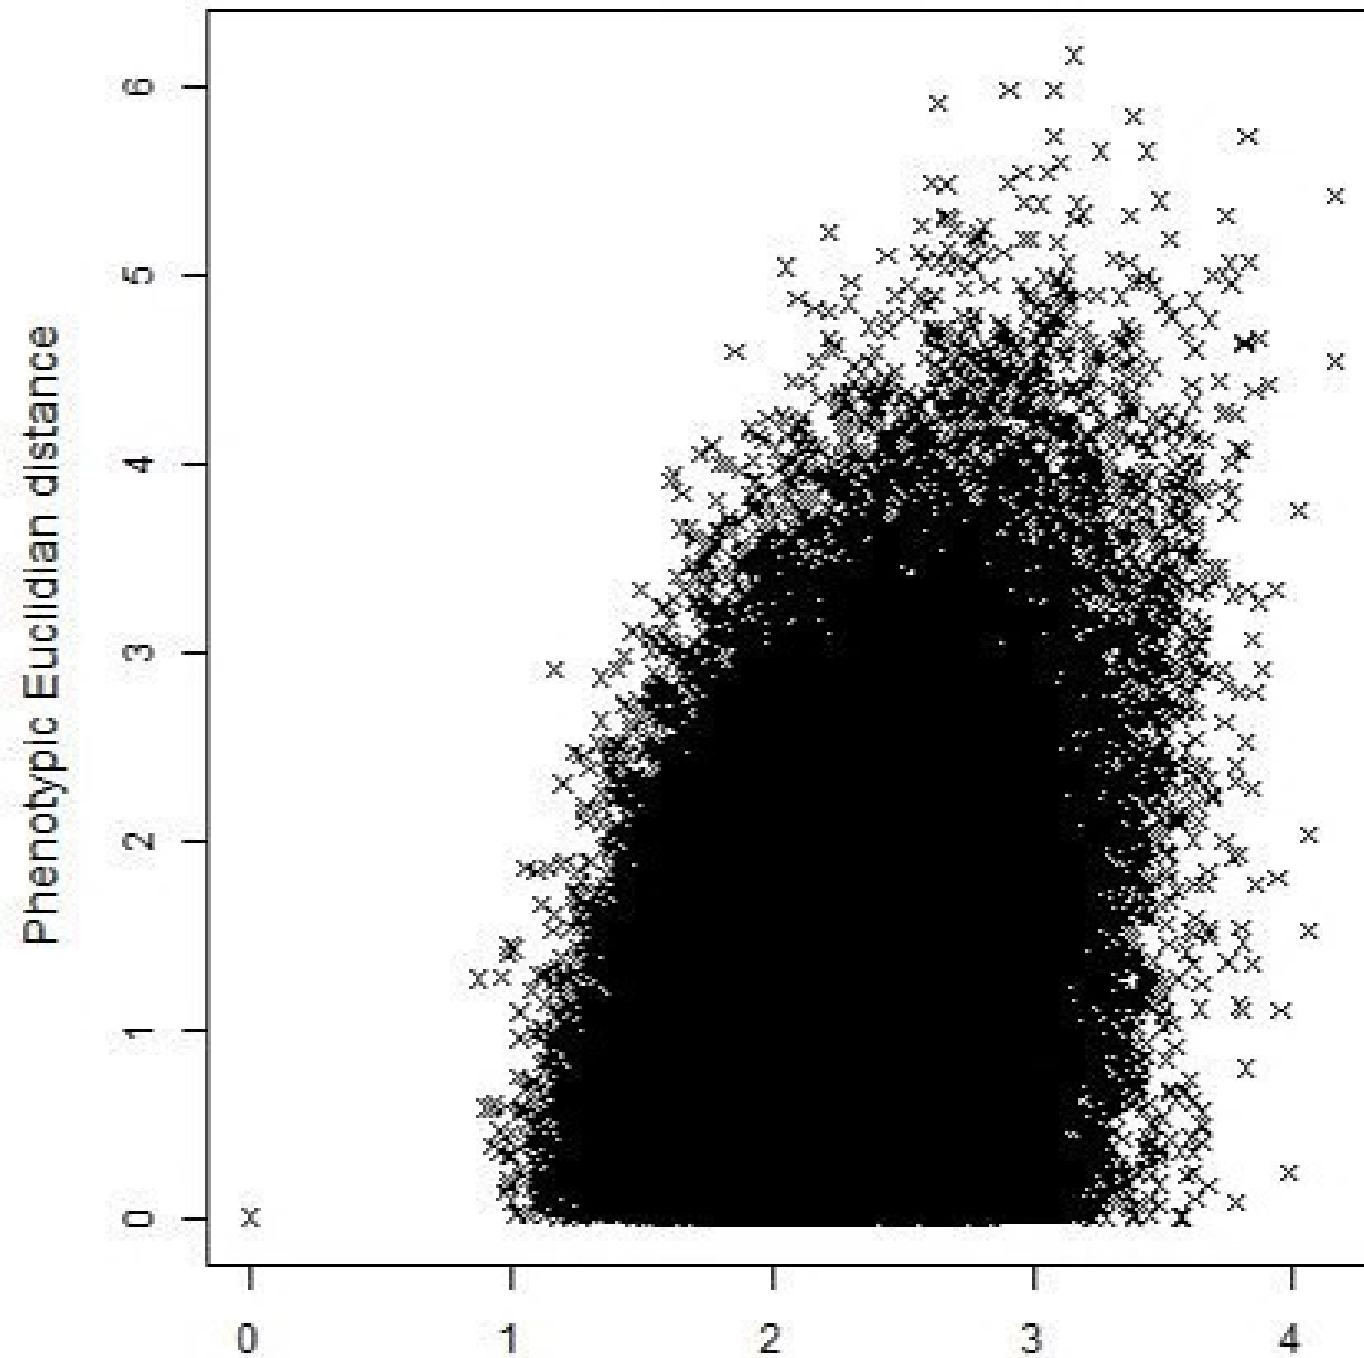

Genetic Euclidian distance (based on the 100 most significantly associated SNPs)

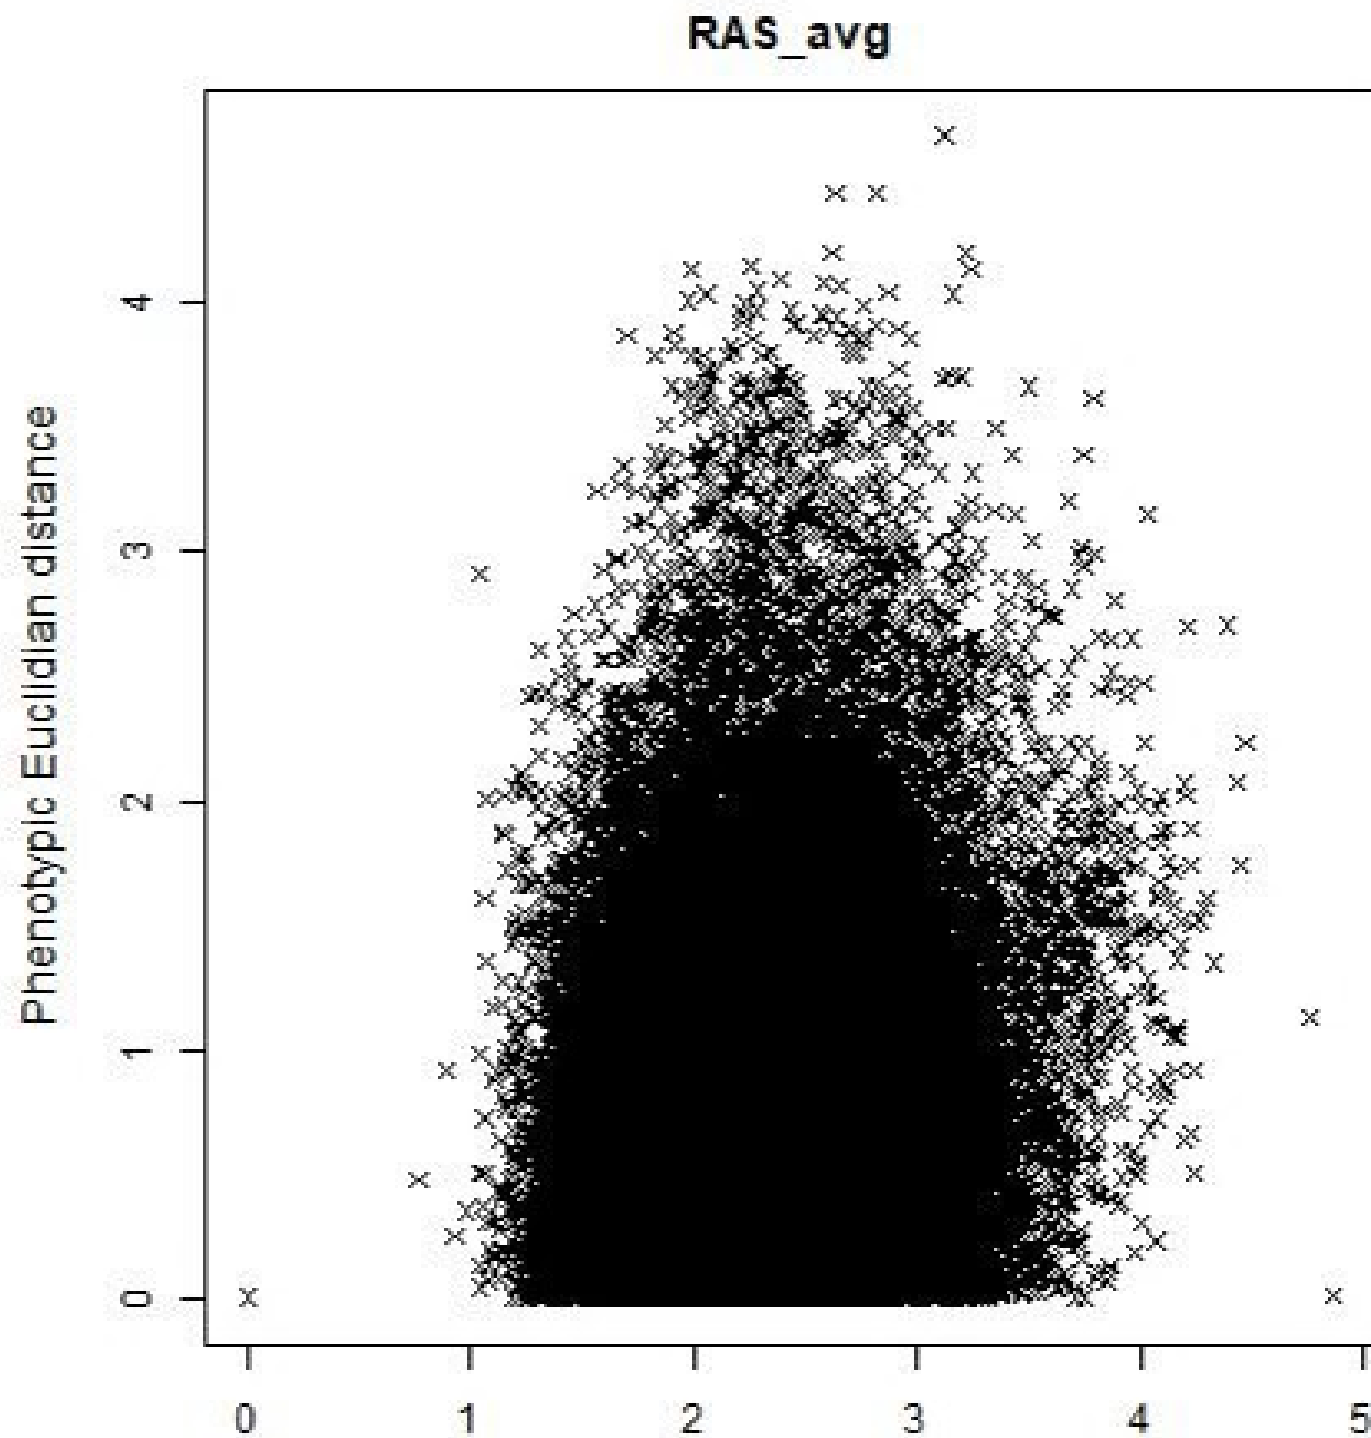

Genetic Euclidian distance (based on the 100 most significantly associated SNPs)



# RAS\_lu15

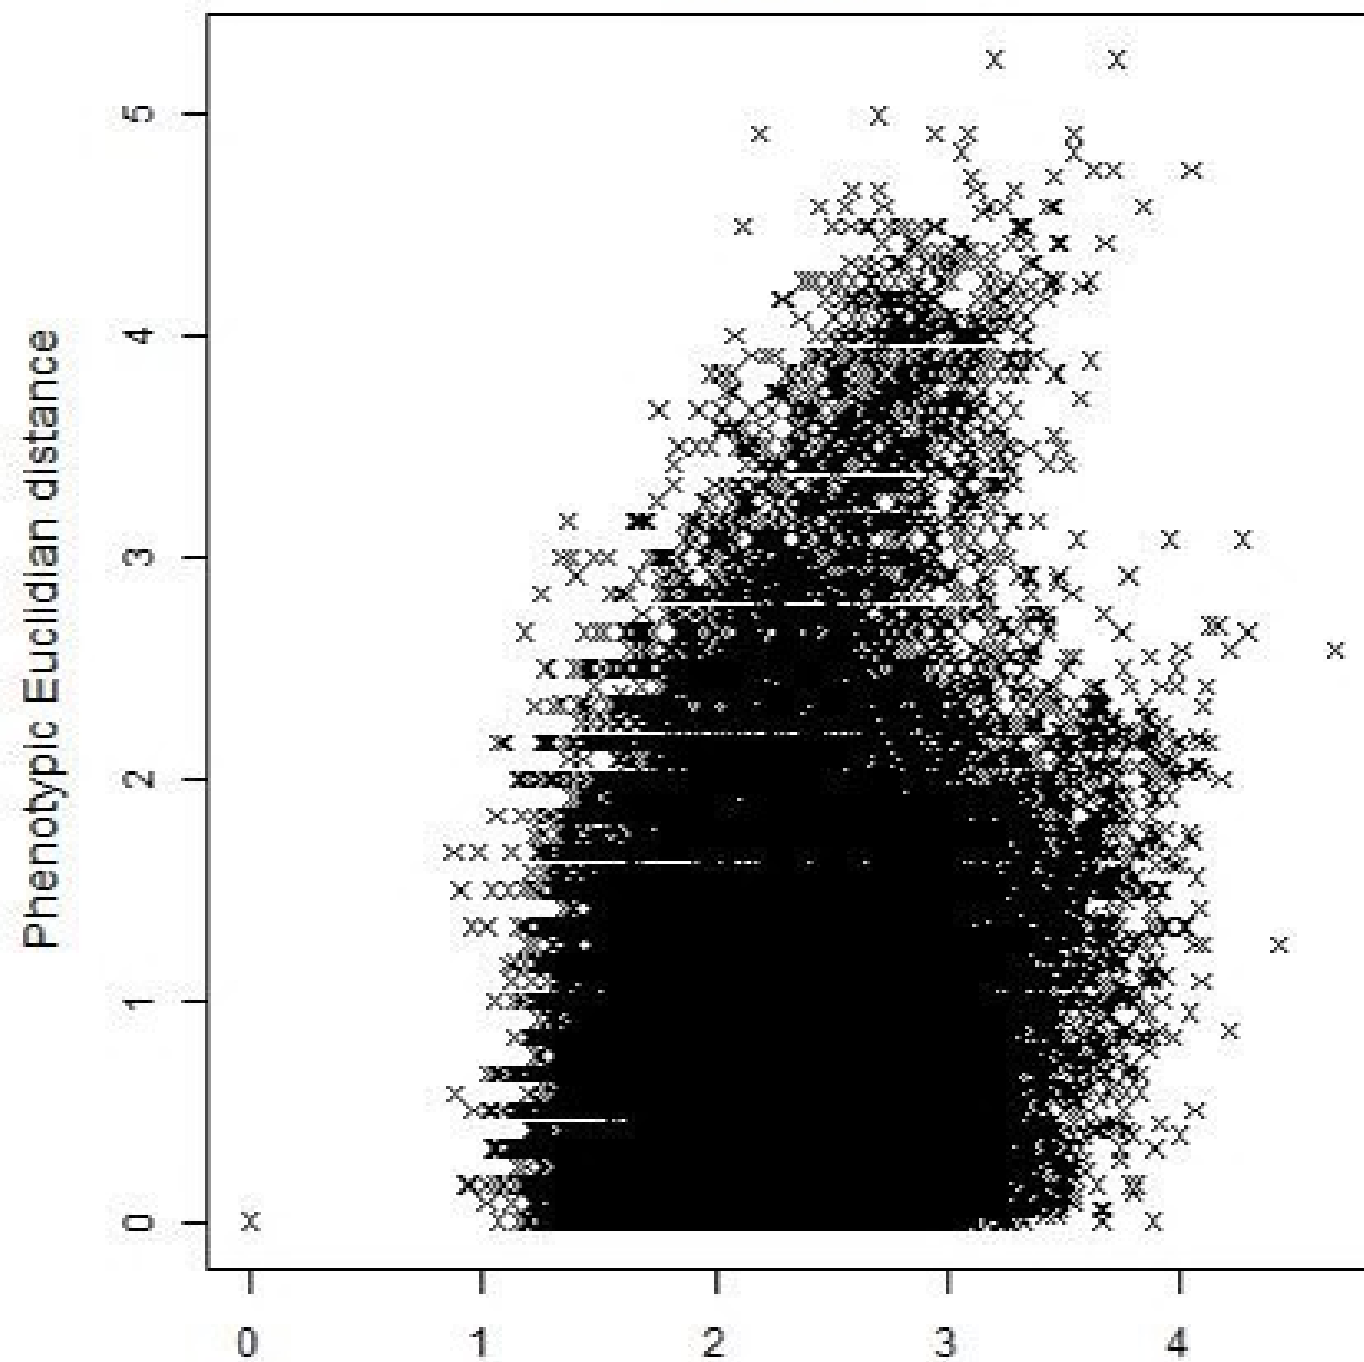

Genetic Euclidian distance (based on the 100 most significantly associated SNPs)

# RAS\_me15

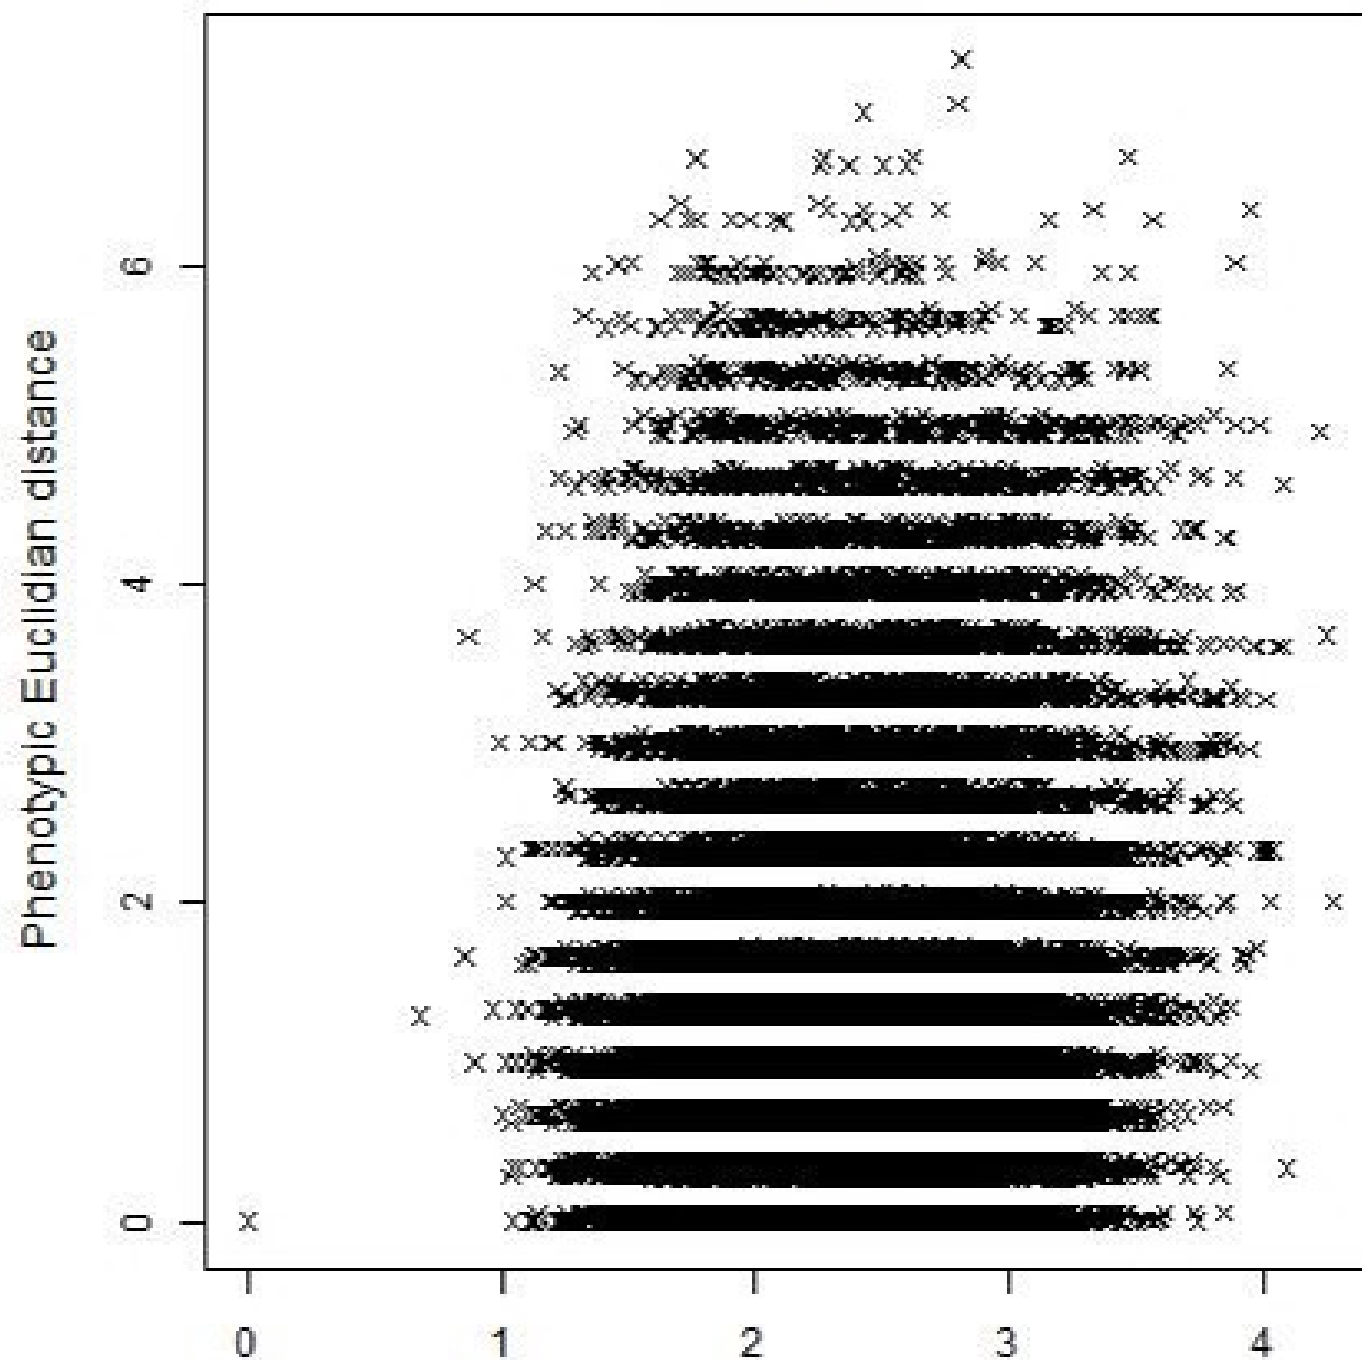

Genetic Euclidian distance (based on the 100 most significantly associated SNPs)

RAS\_po15

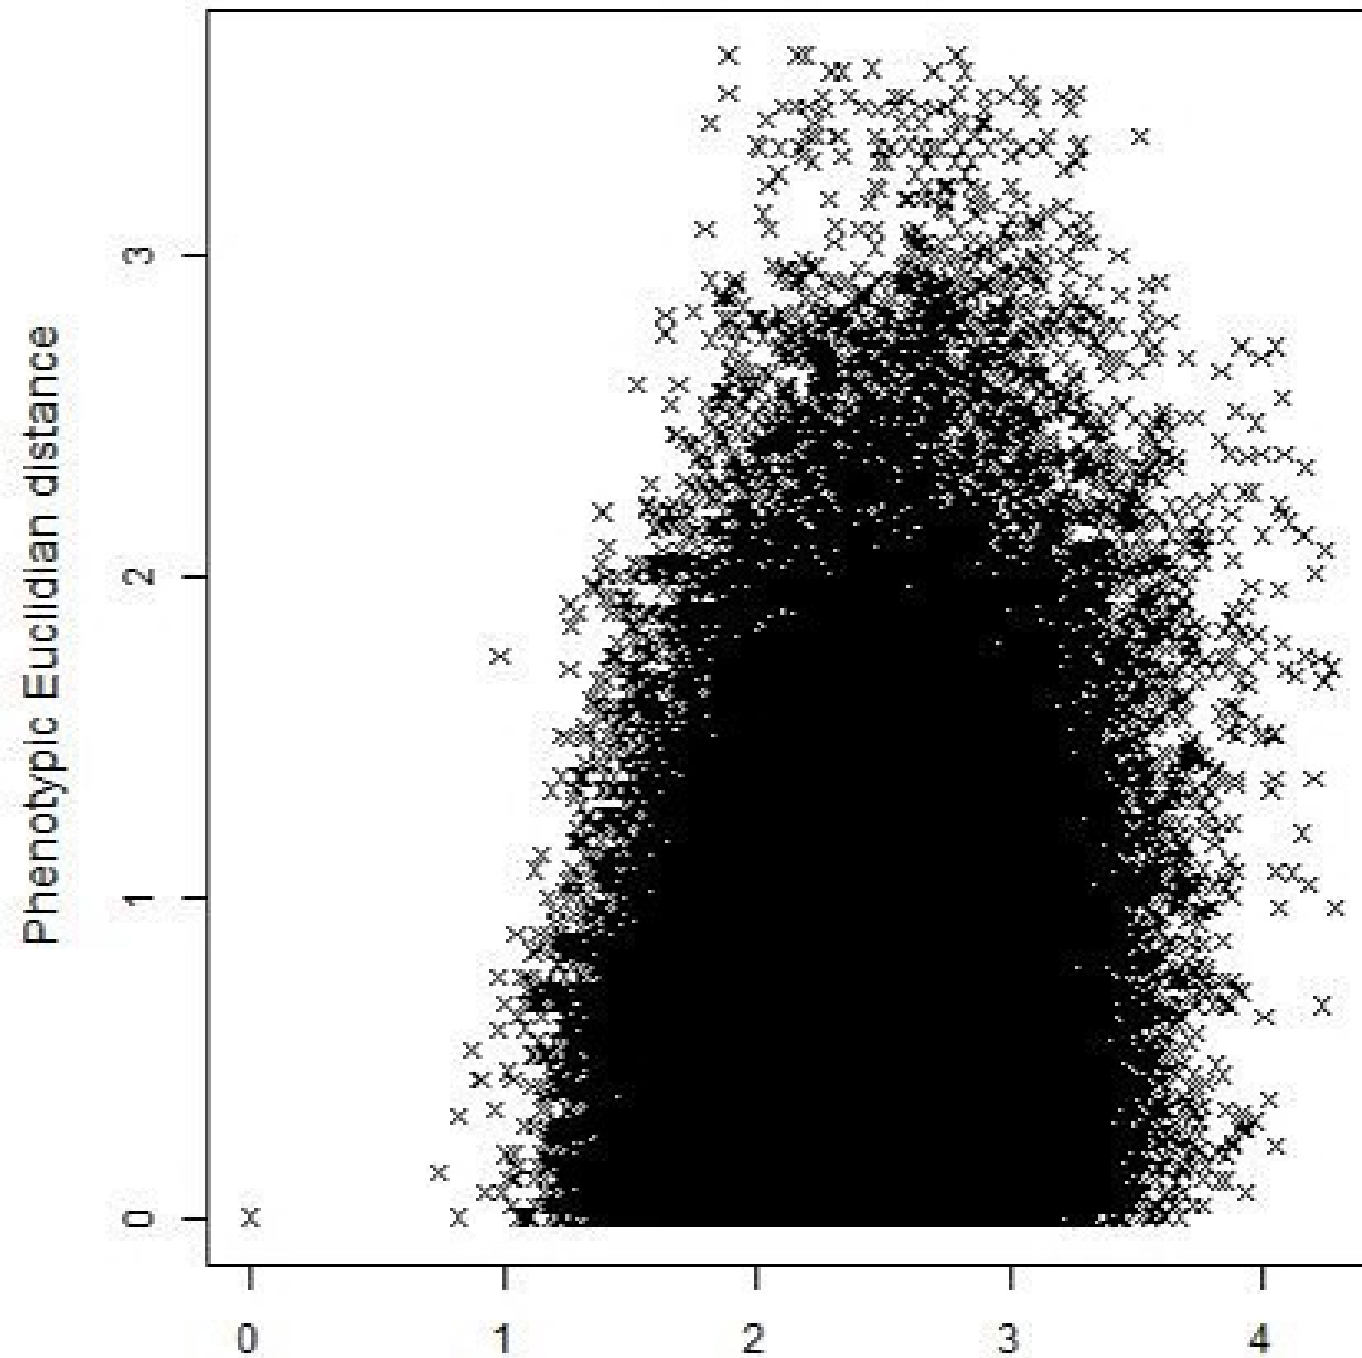

Genetic Euclidian distance (based on the 100 most significantly associated SNPs)

resCH300h\_lu16

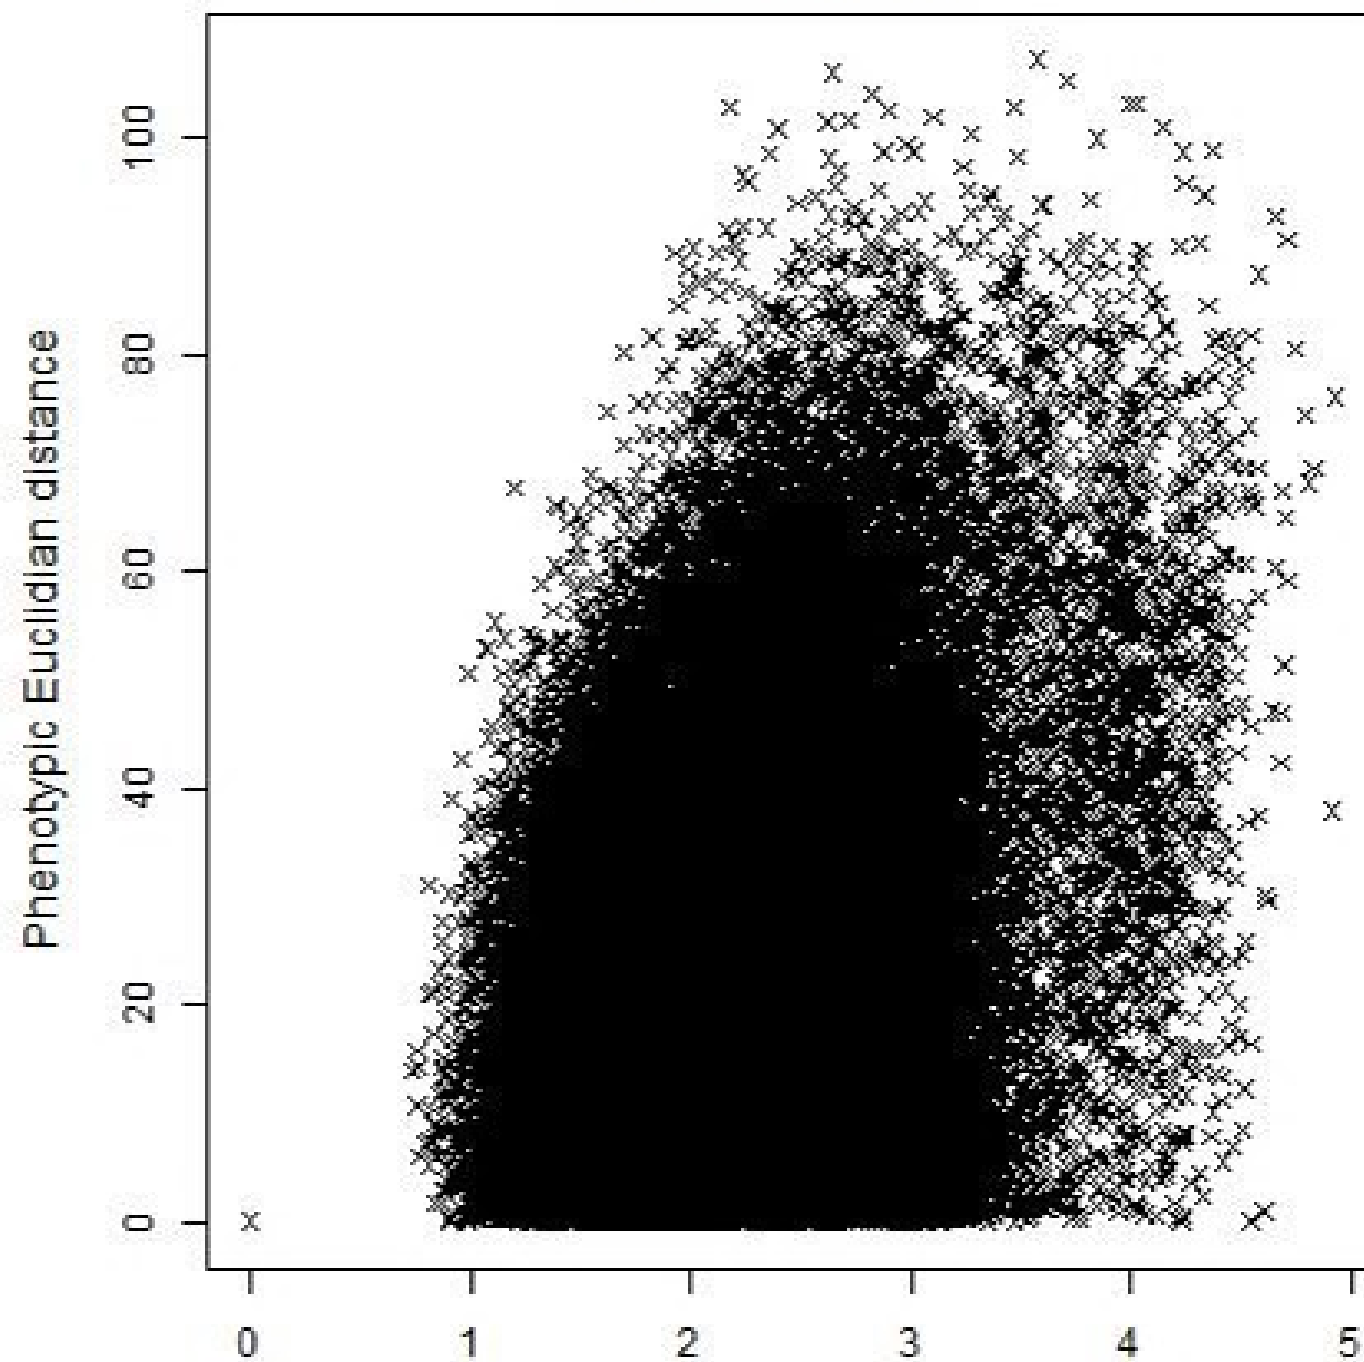

Genetic Euclidian distance (based on the 100 most significantly associated SNPs)

resCH300h\_lu17

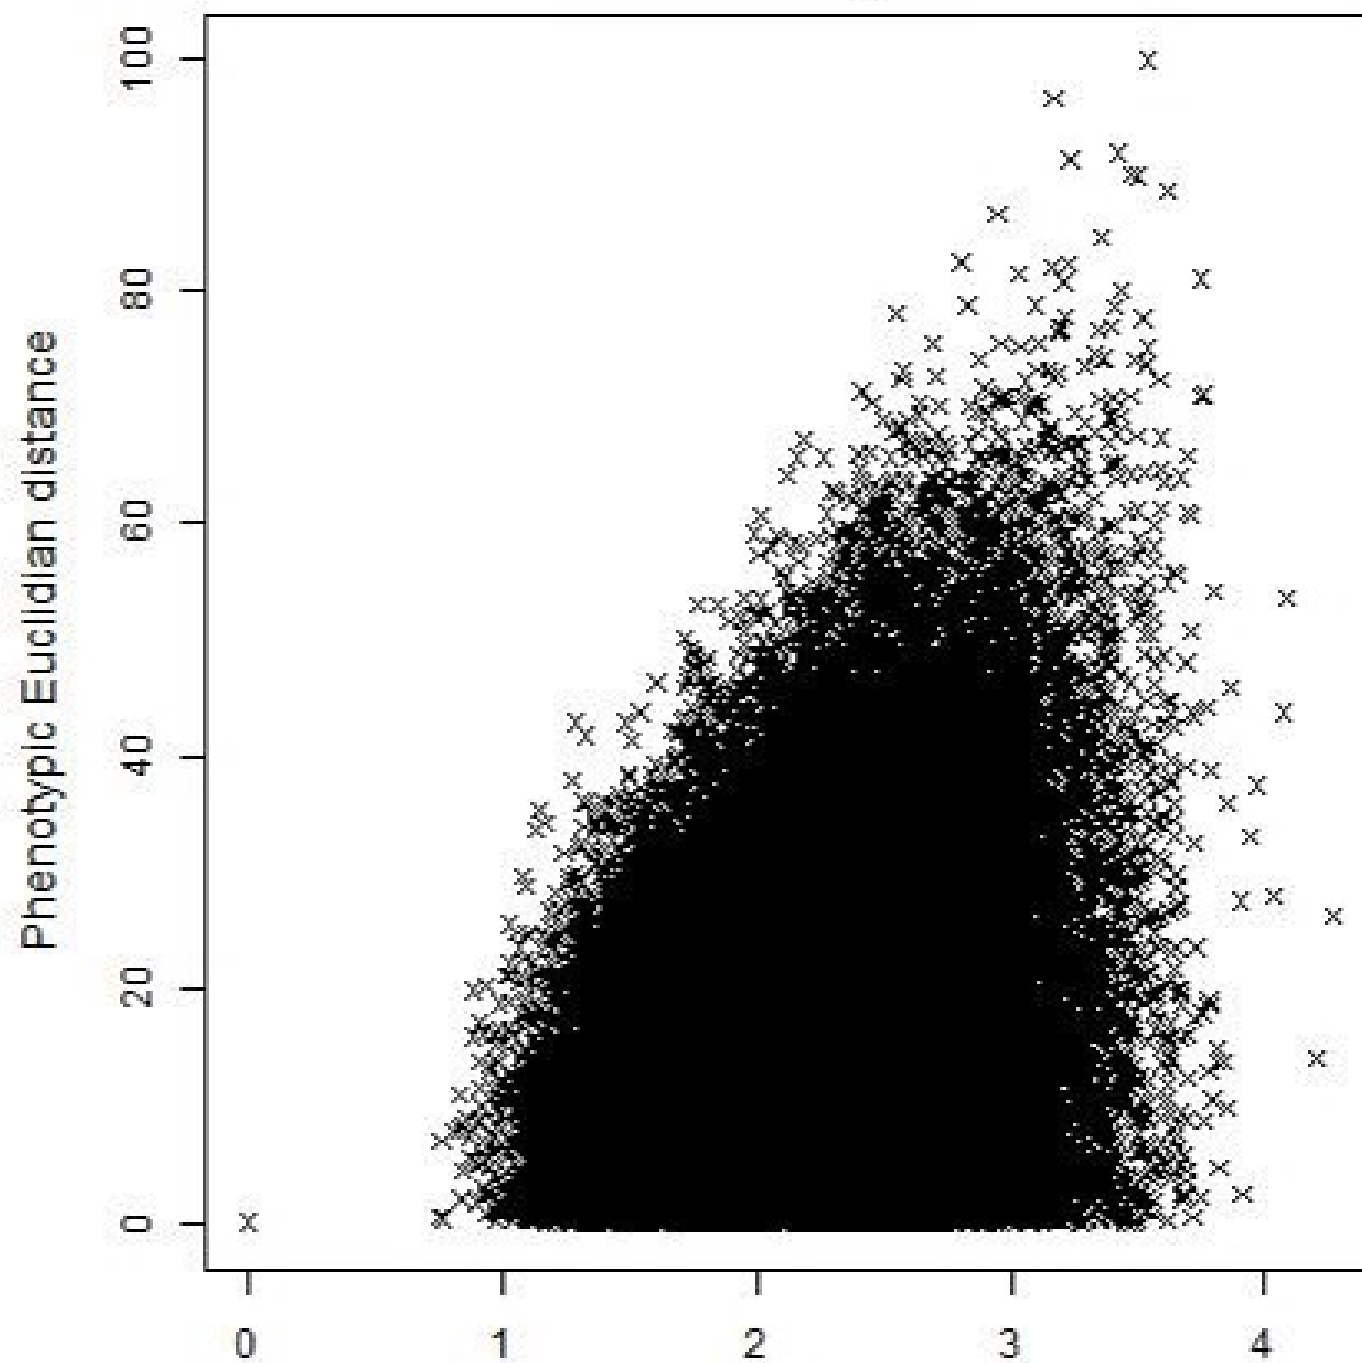

Genetic Euclidian distance (based on the 100 most significantly associated SNPs)

resCH300h\_po16

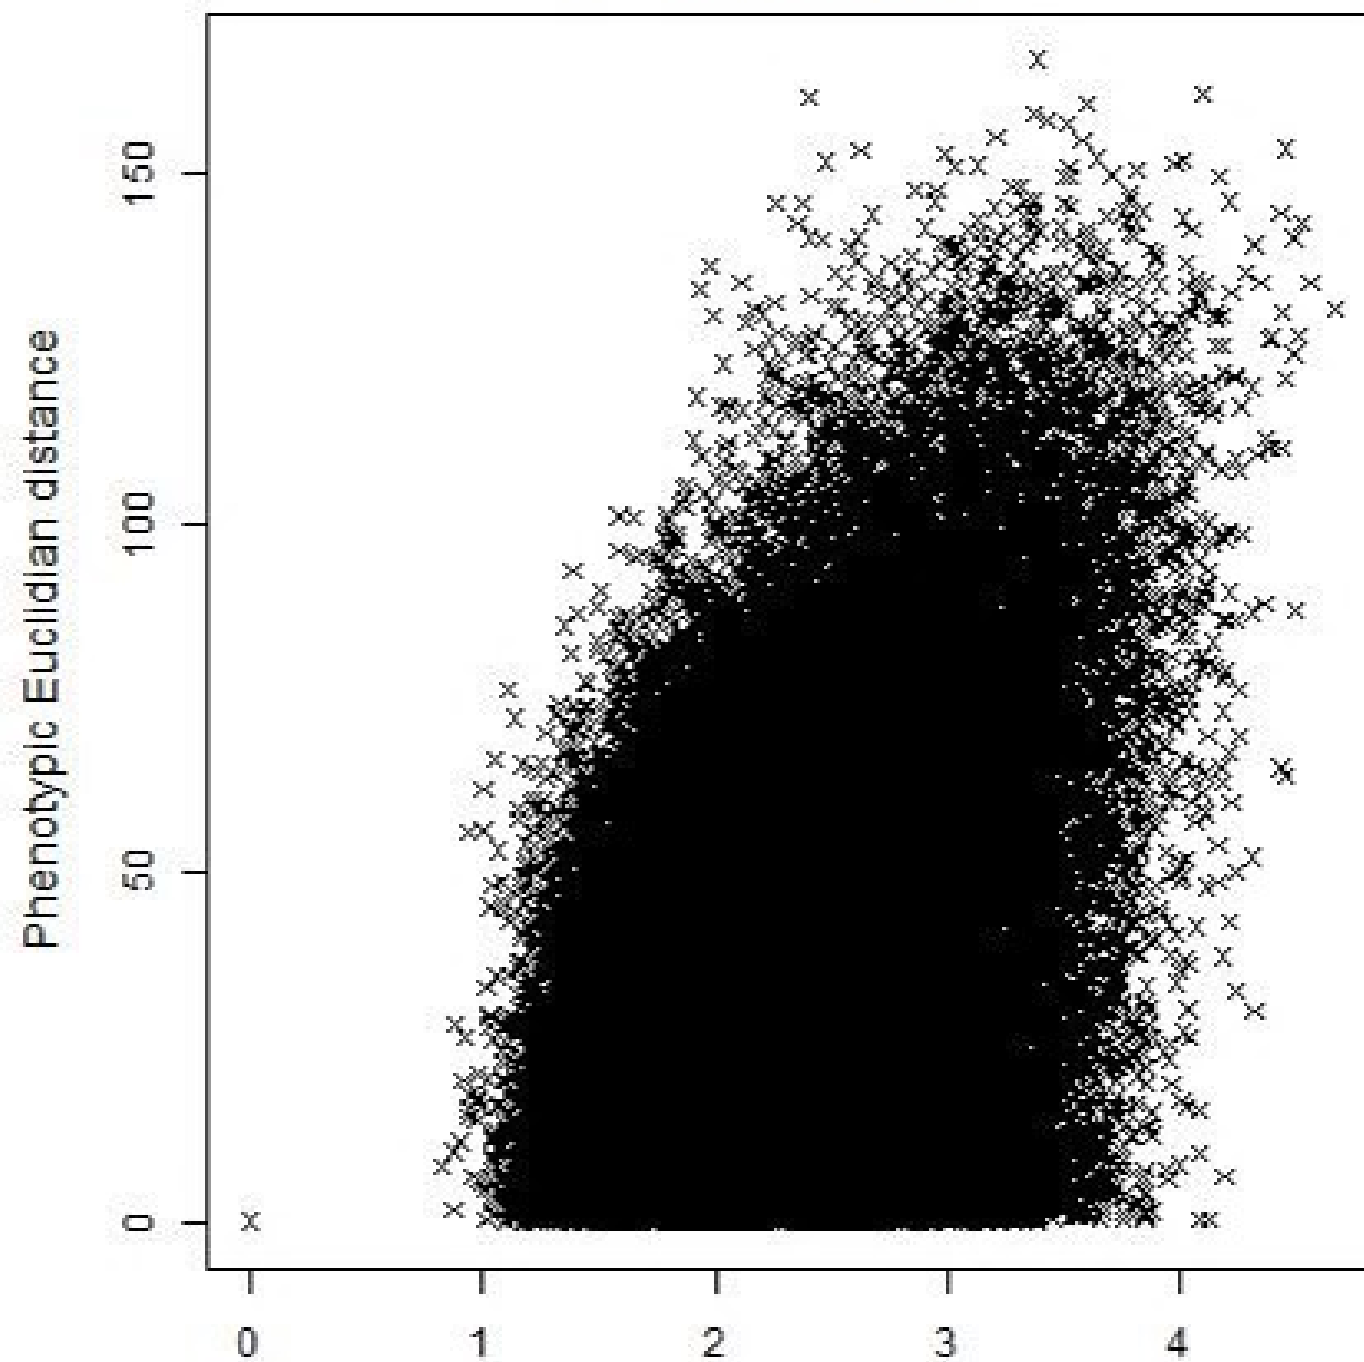

Genetic Euclidian distance (based on the 100 most significantly associated SNPs)

resCH300h\_po17

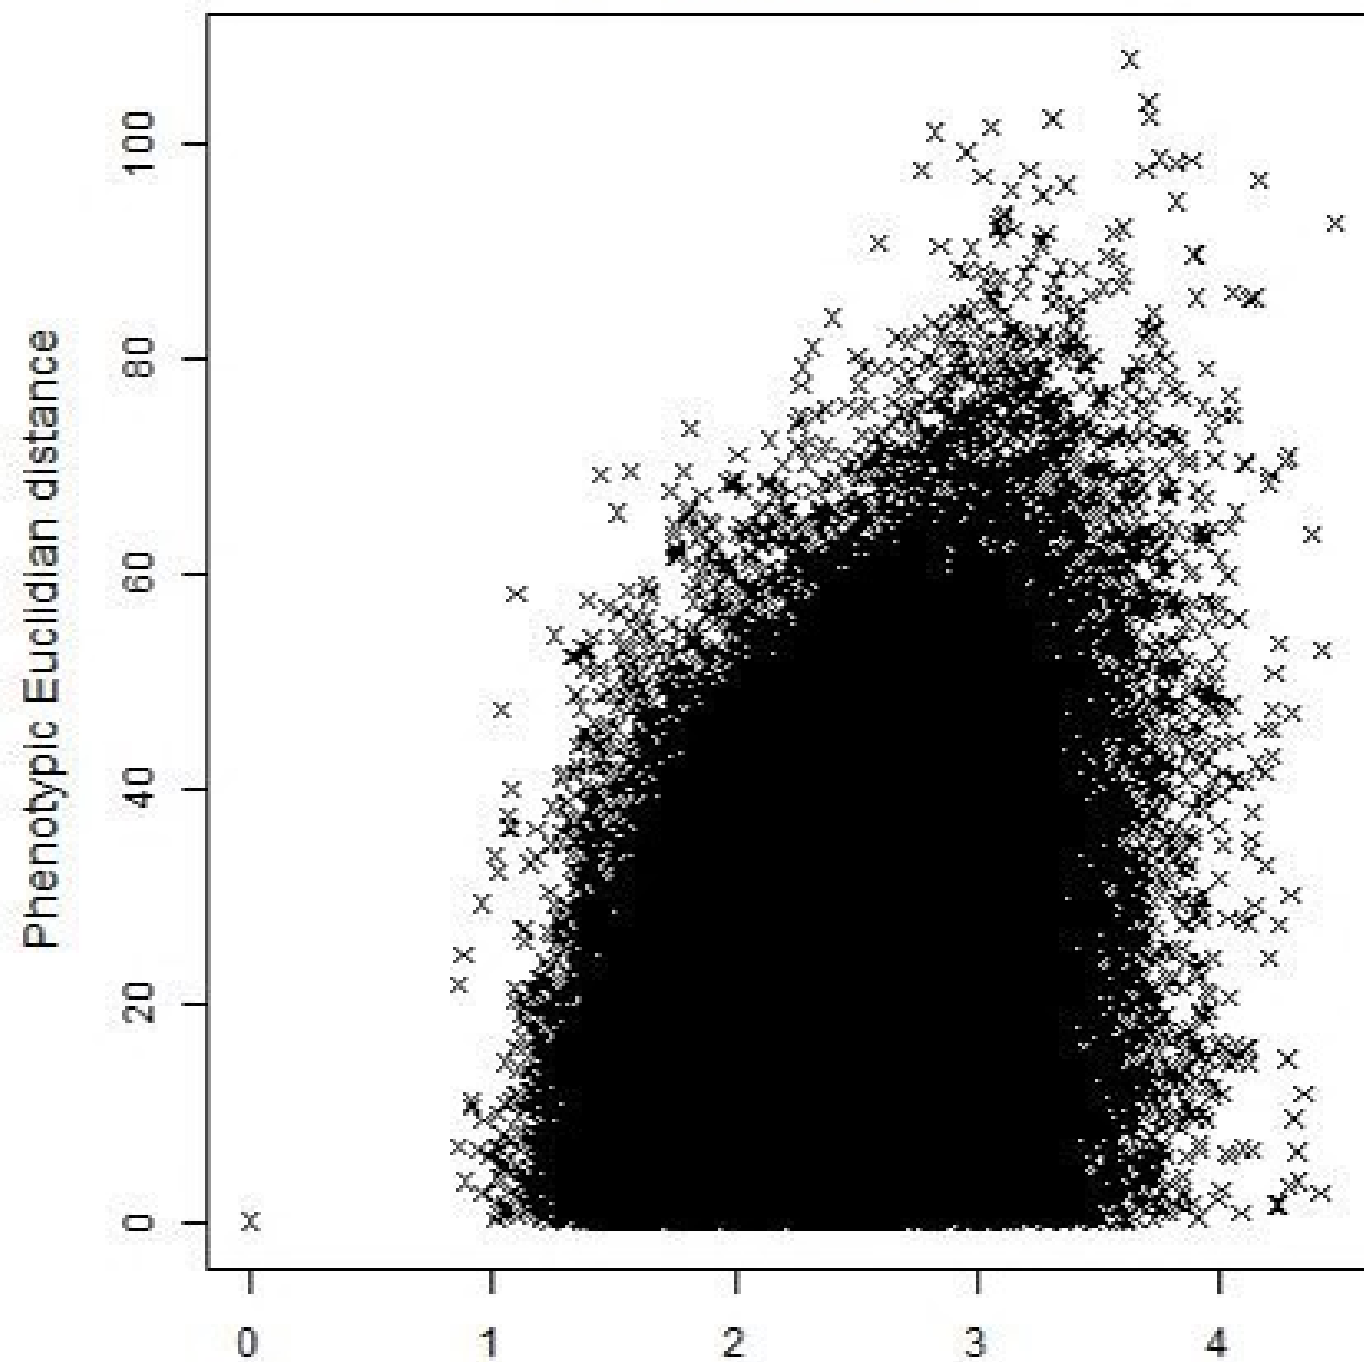

Genetic Euclidian distance (based on the 100 most significantly associated SNPs)

resCH400h\_lu16

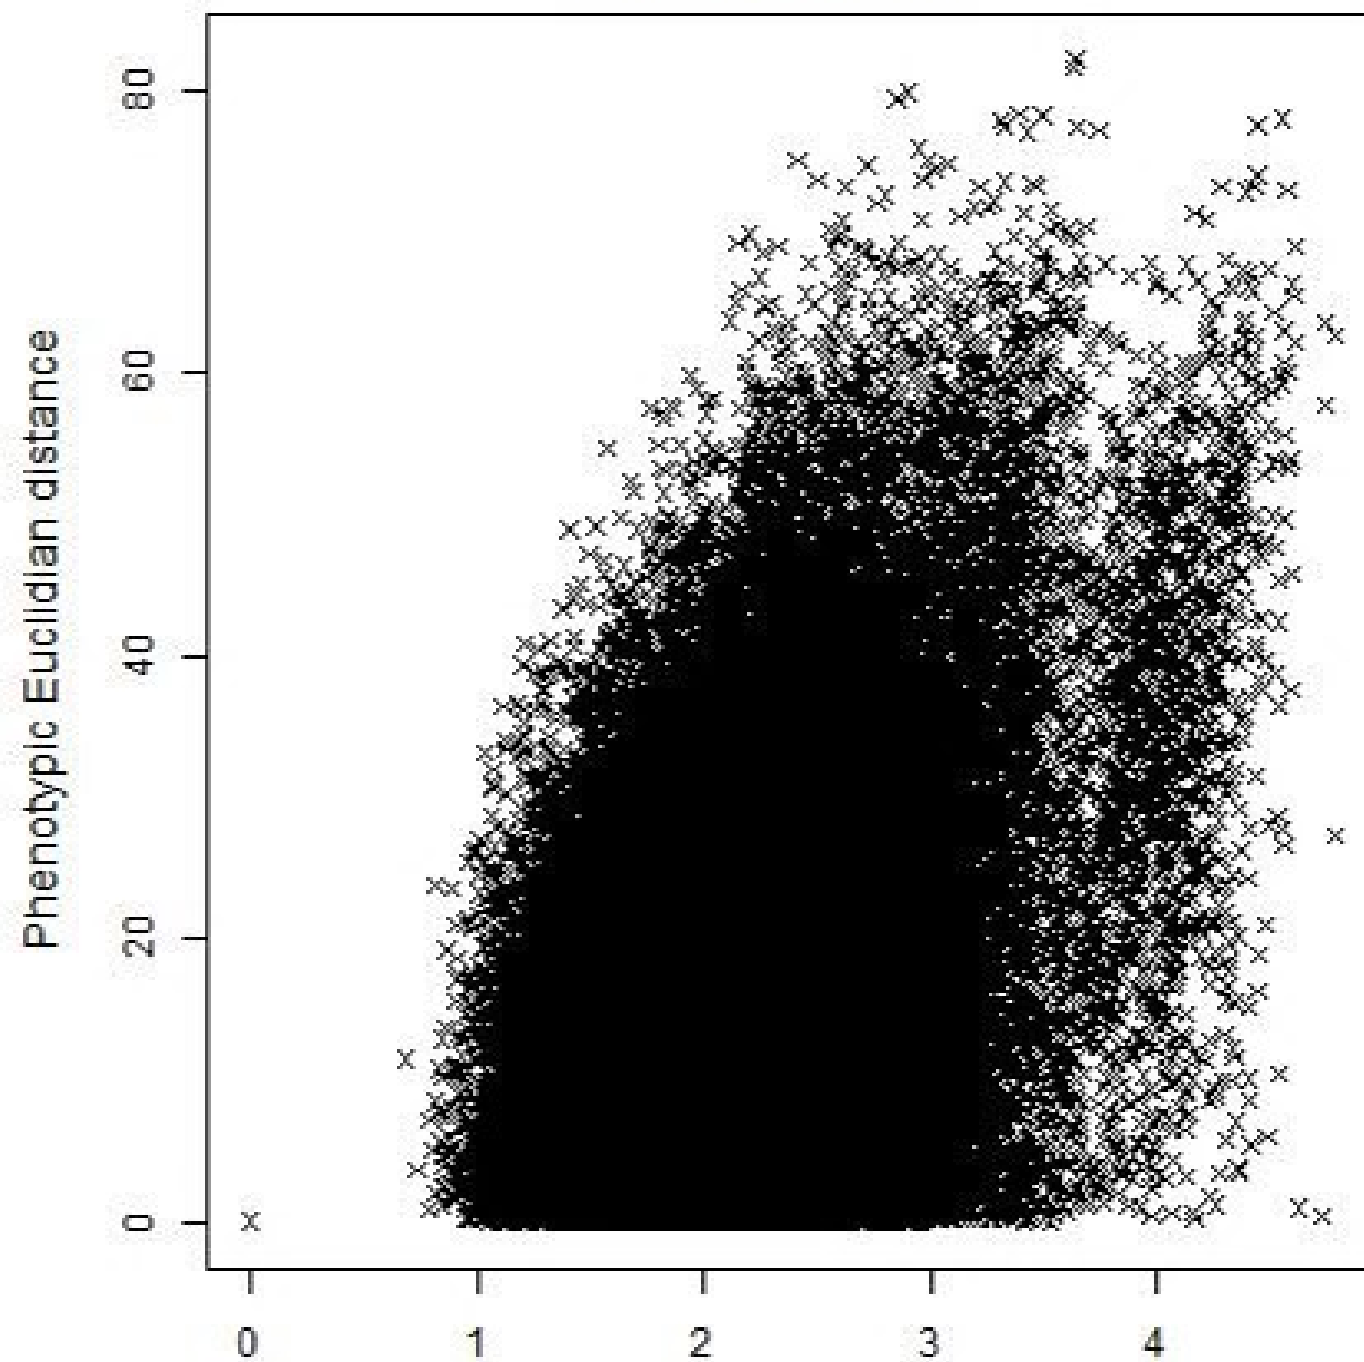

Genetic Euclidian distance (based on the 100 most significantly associated SNPs)



resCH400h\_lu17

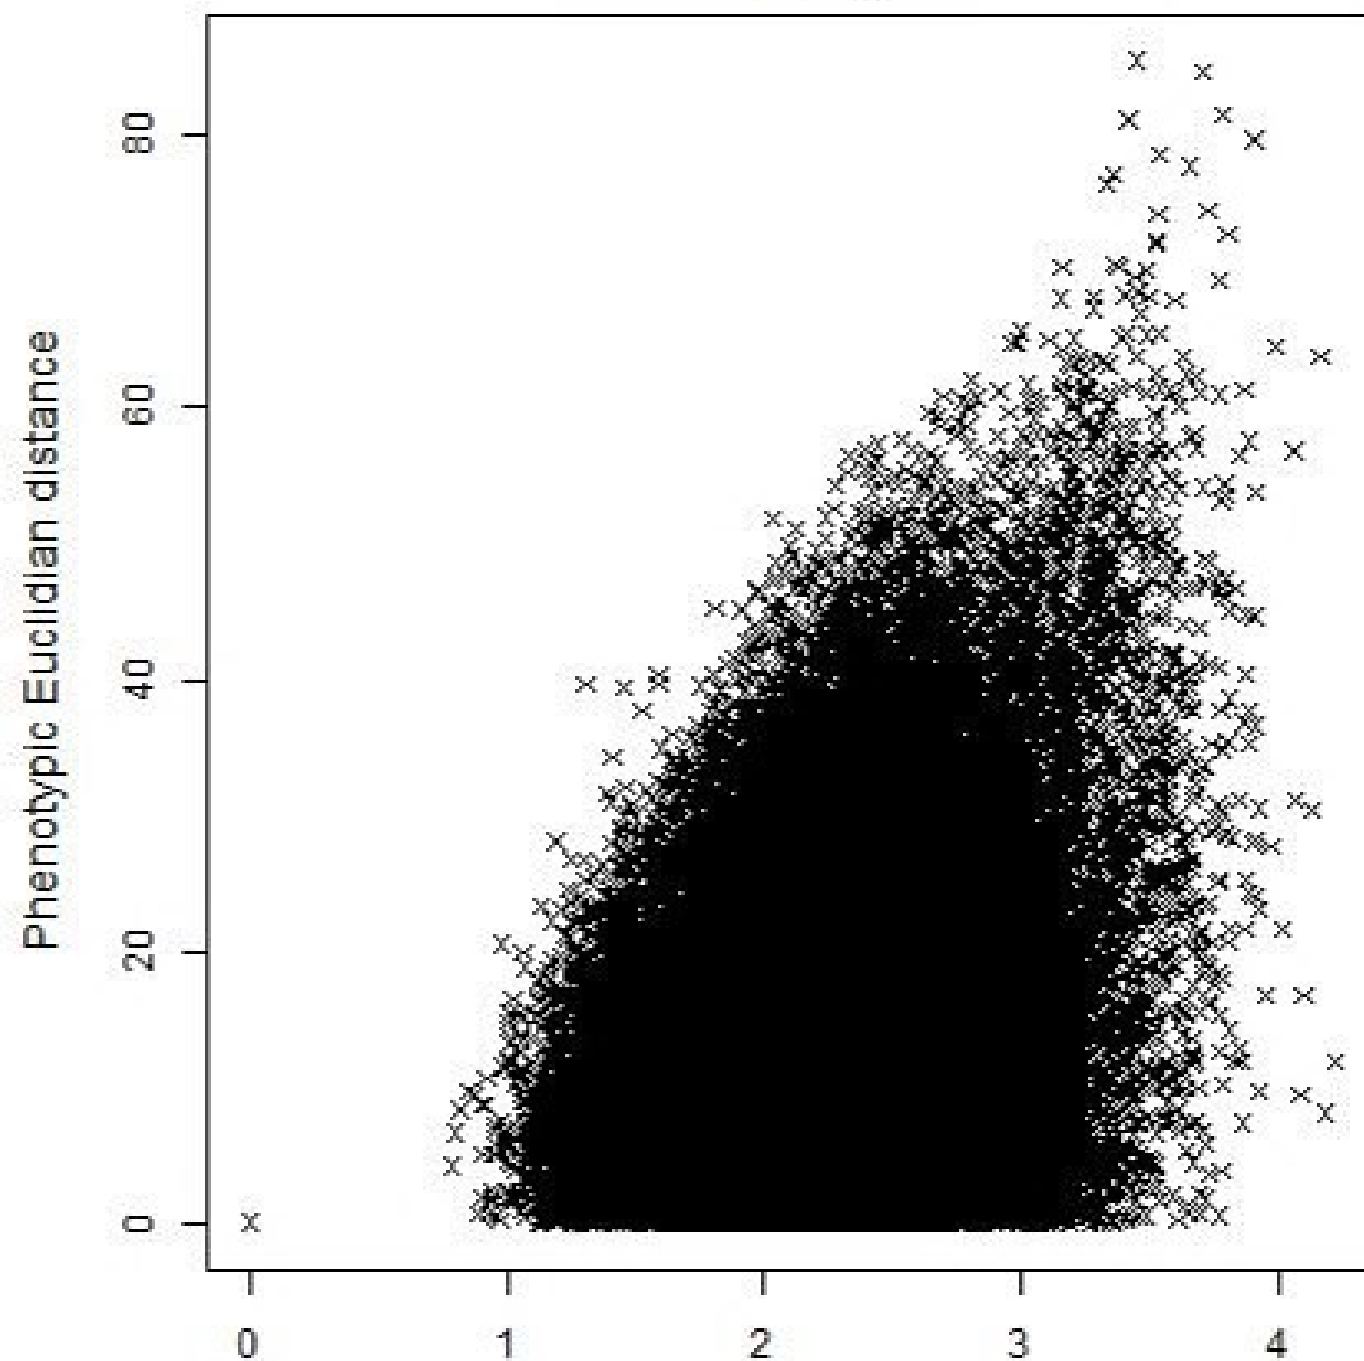

Genetic Euclidian distance (based on the 100 most significantly associated SNPs)

resCH400h\_po16

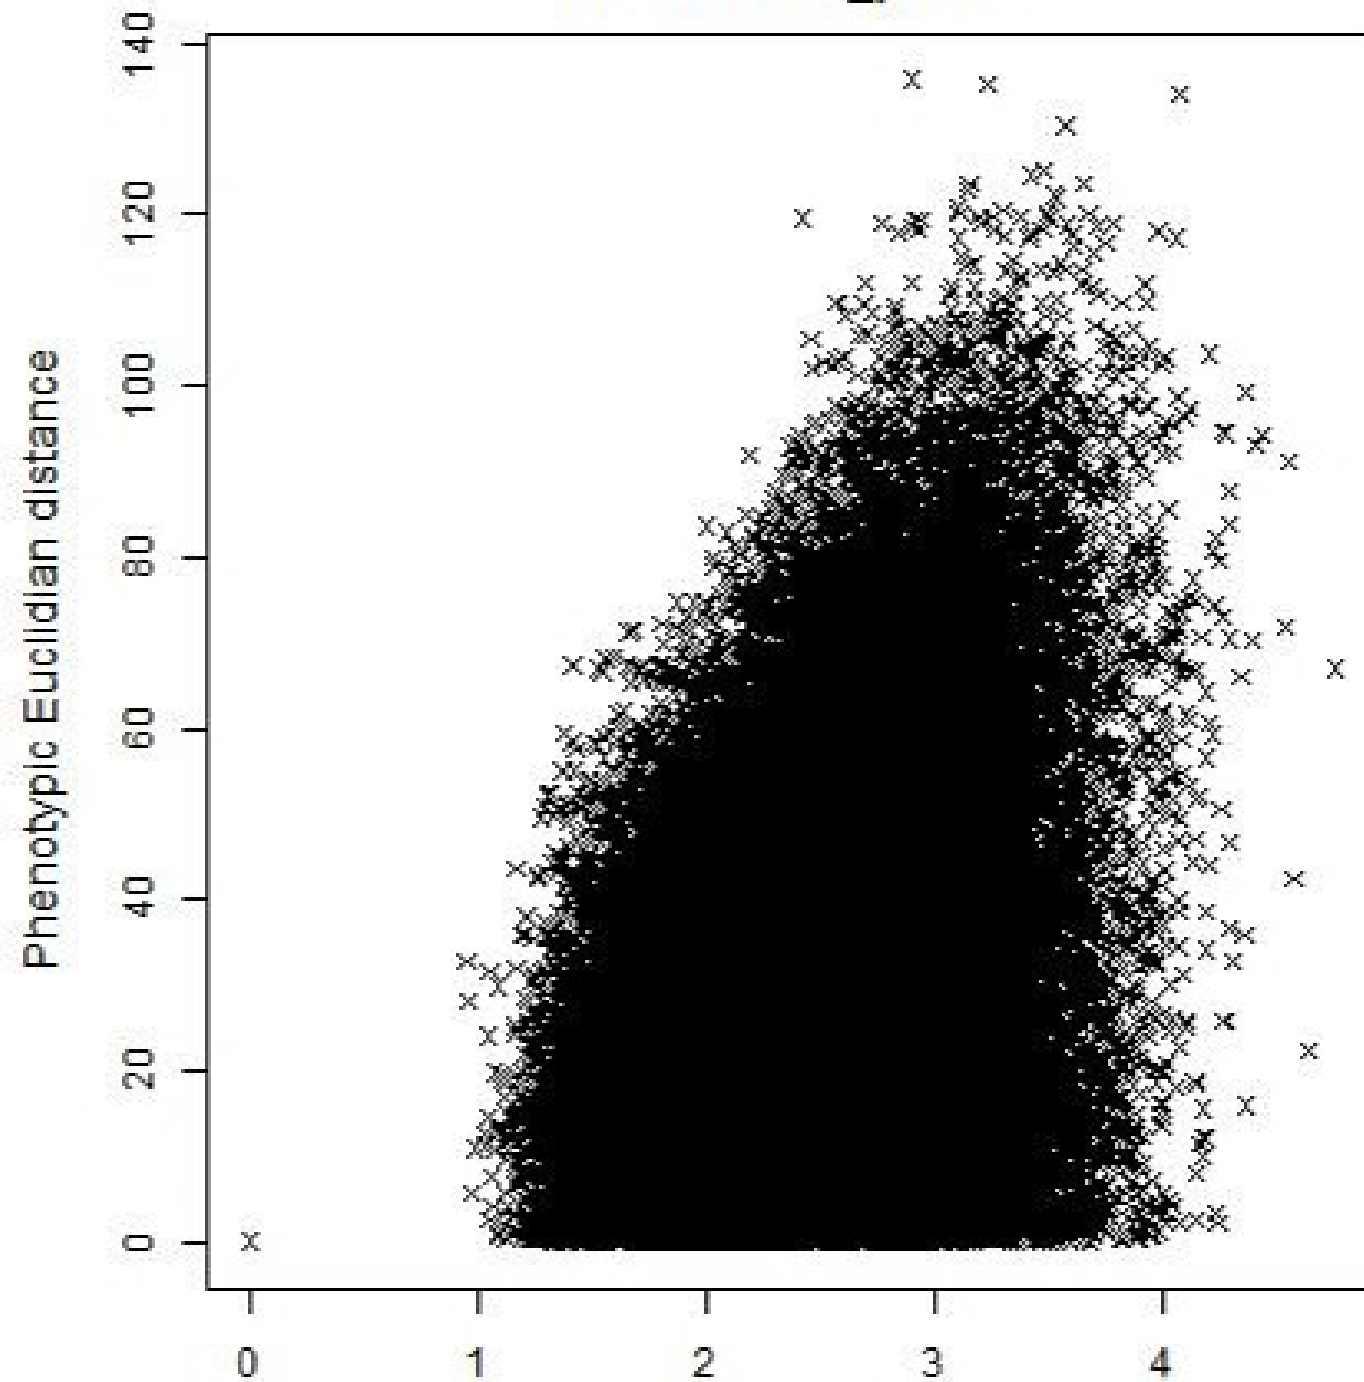

Genetic Euclidian distance (based on the 100 most significantly associated SNPs)

resCH400h\_po17

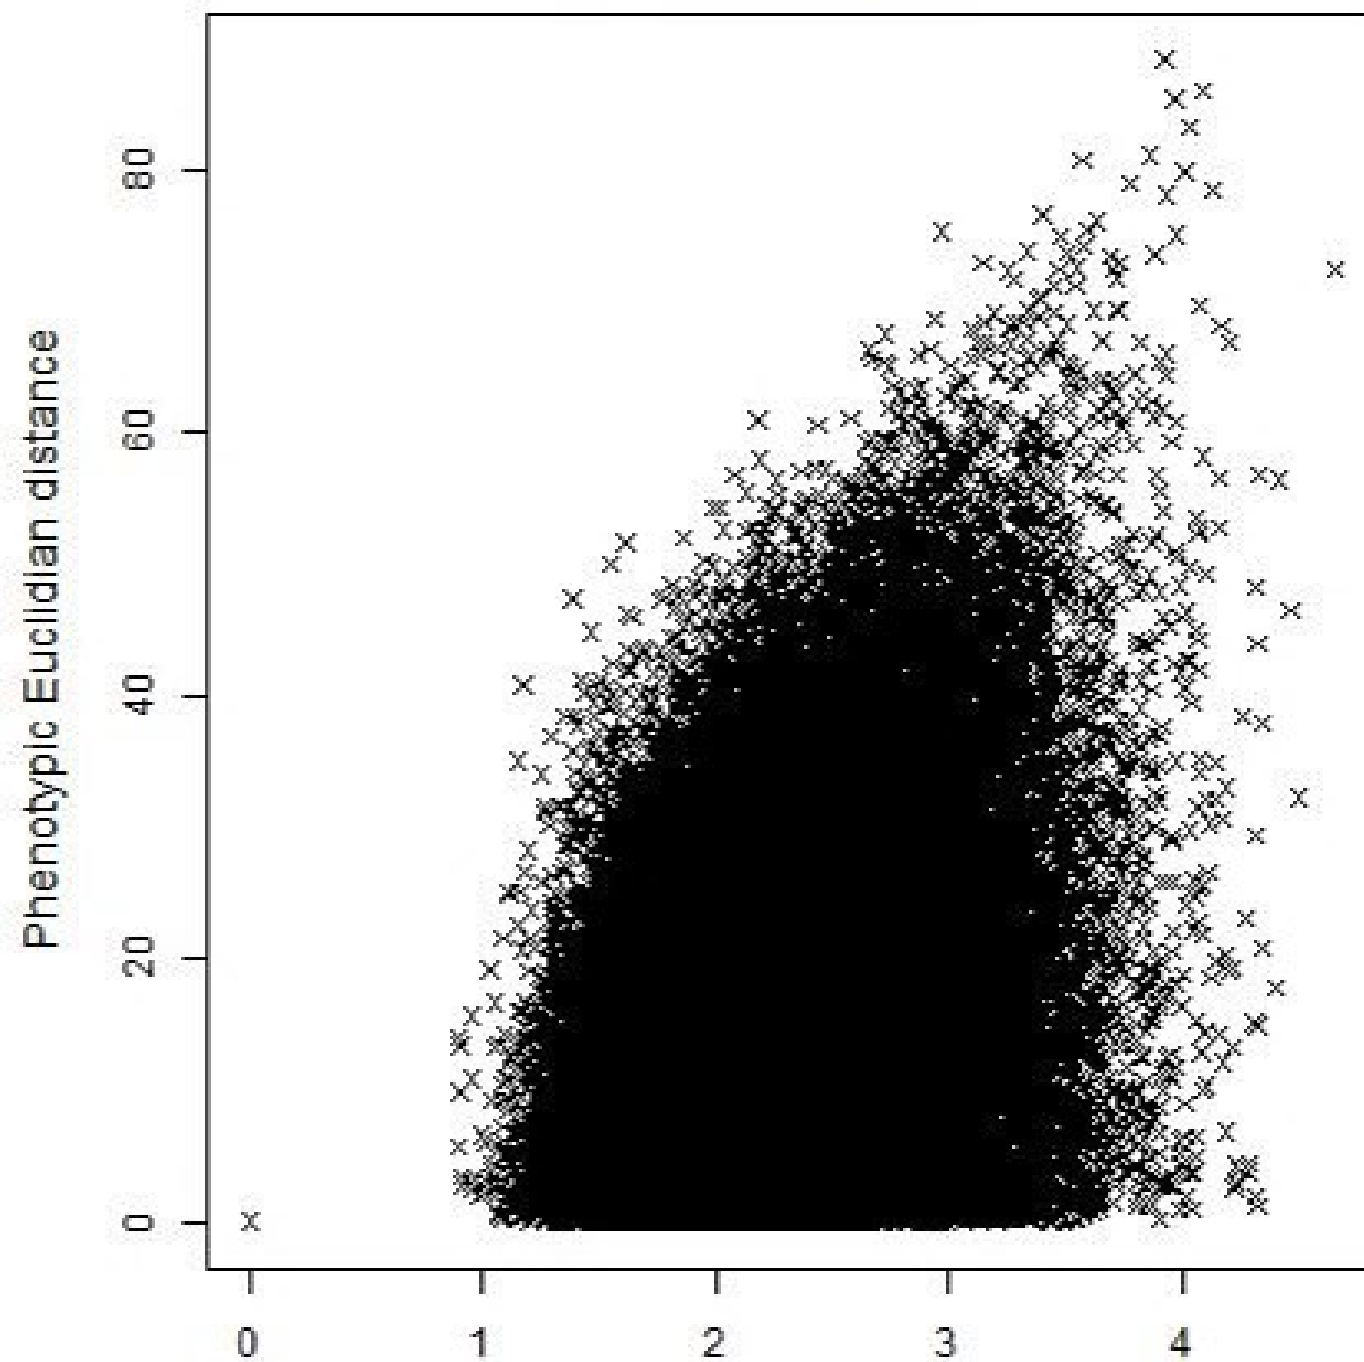

Genetic Euclidian distance (based on the 100 most significantly associated SNPs)

resCHs300\_lu16

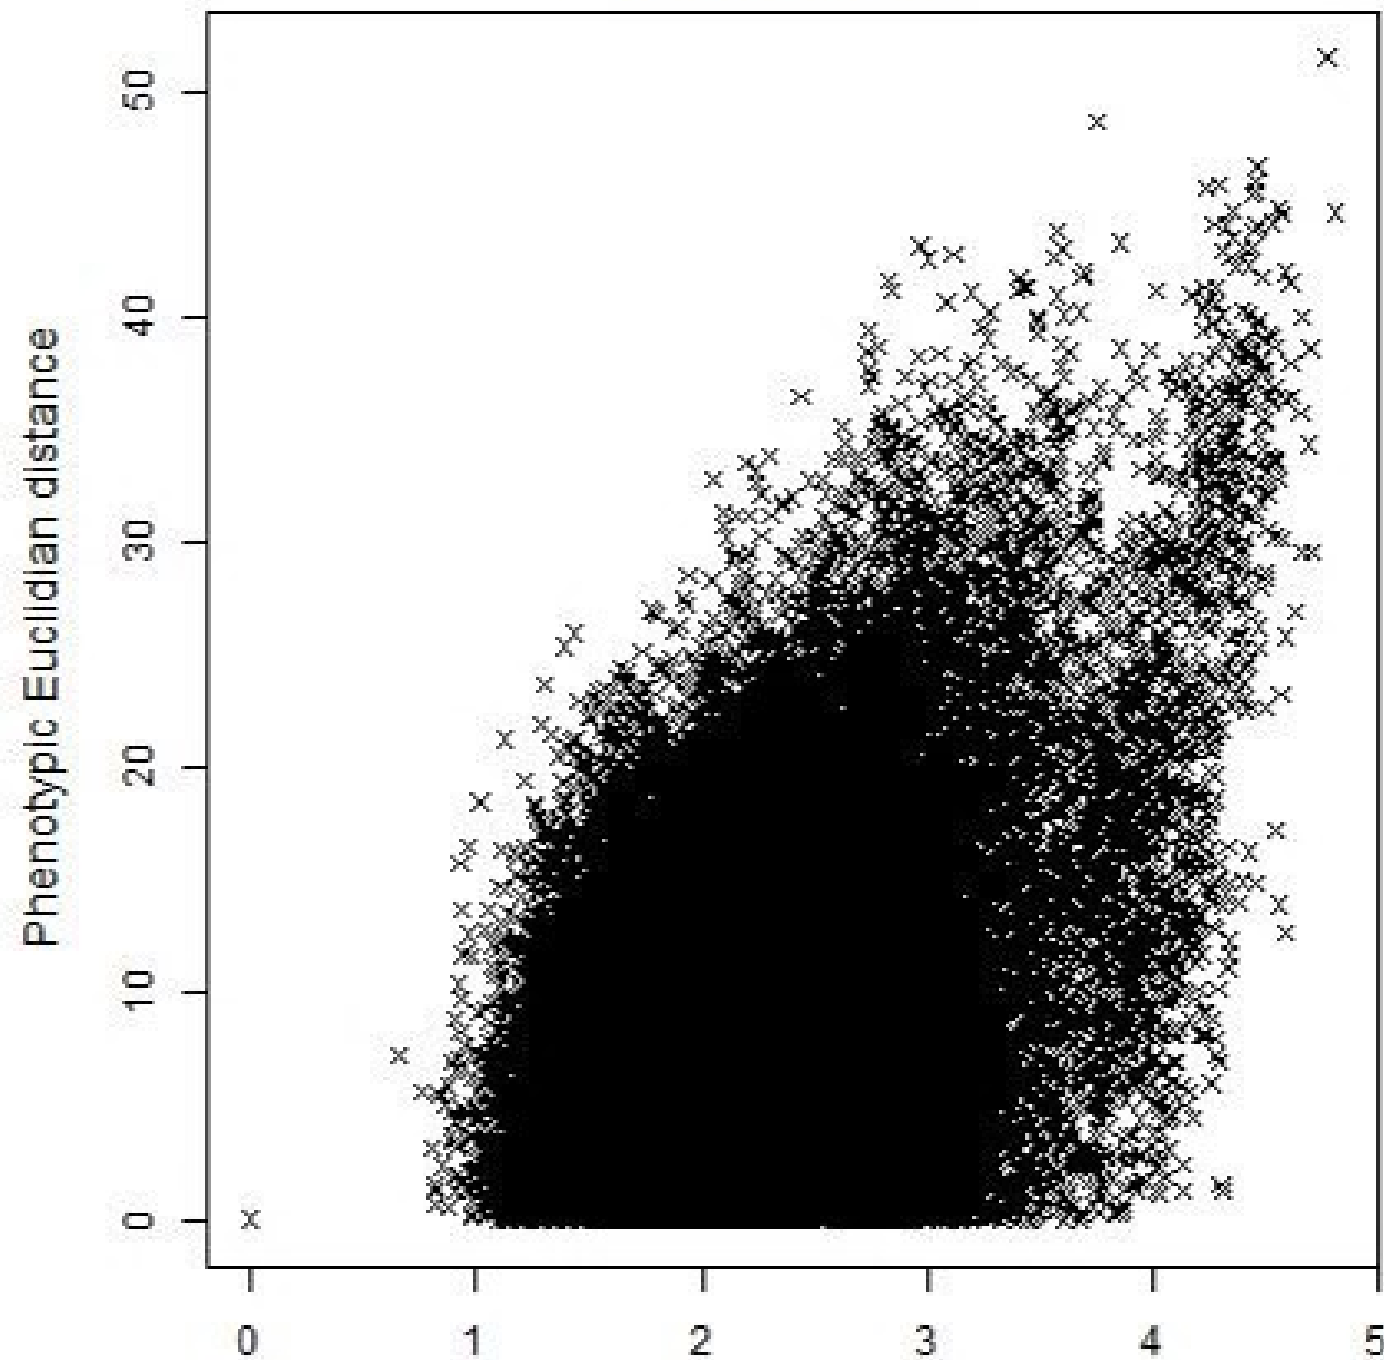

Genetic Euclidian distance (based on the 100 most significantly associated SNPs)

resCHs300\_lu17

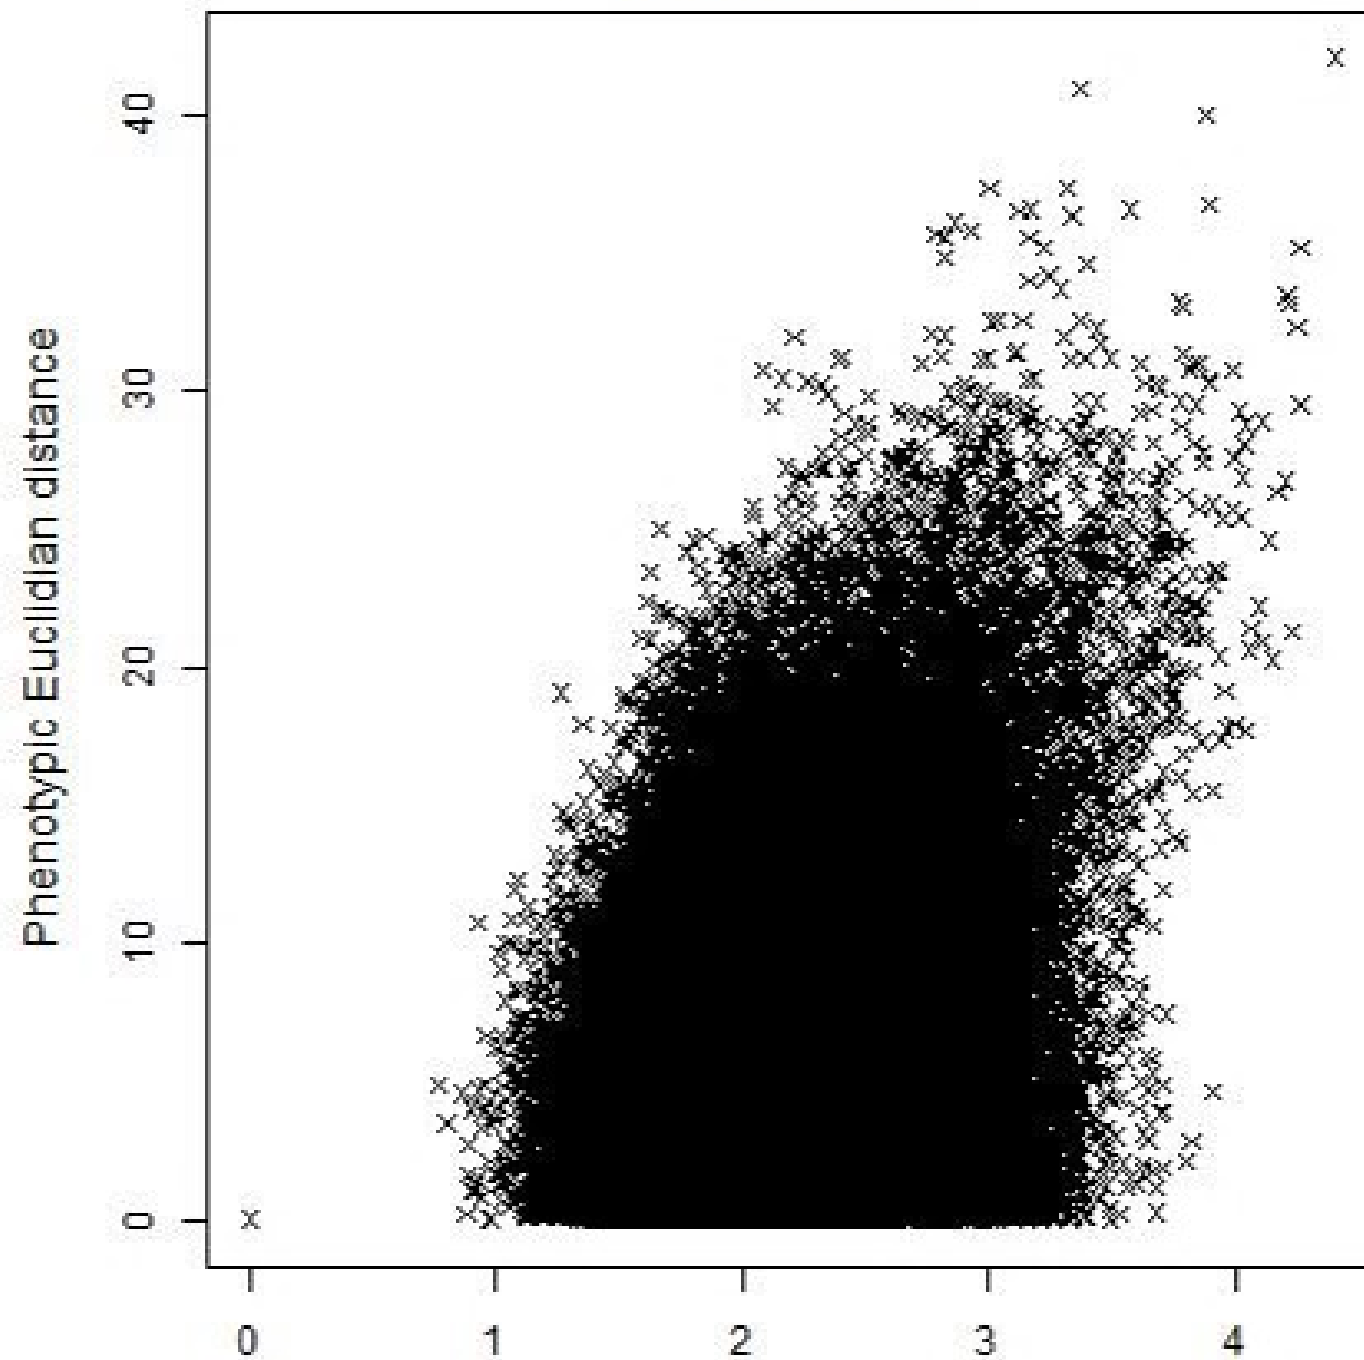

Genetic Euclidian distance (based on the 100 most significantly associated SNPs)

resCHs300\_me16

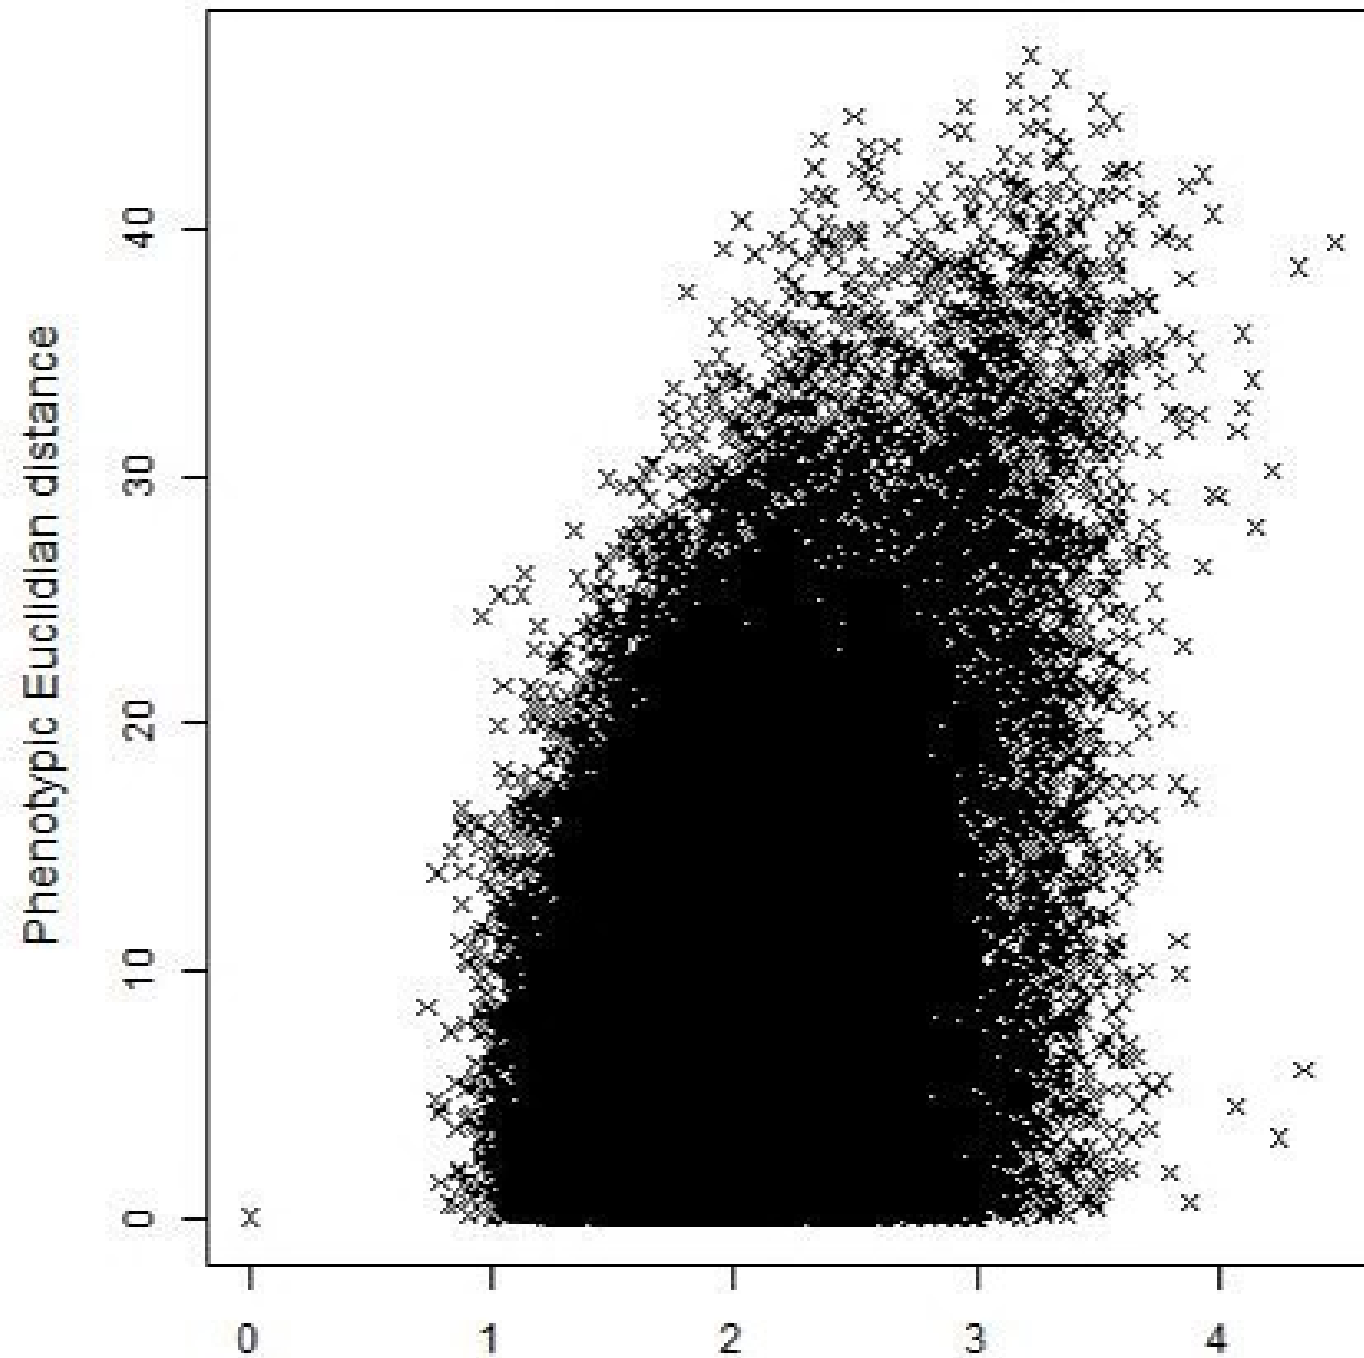

Genetic Euclidian distance (based on the 100 most significantly associated SNPs)

resCHs300\_me17

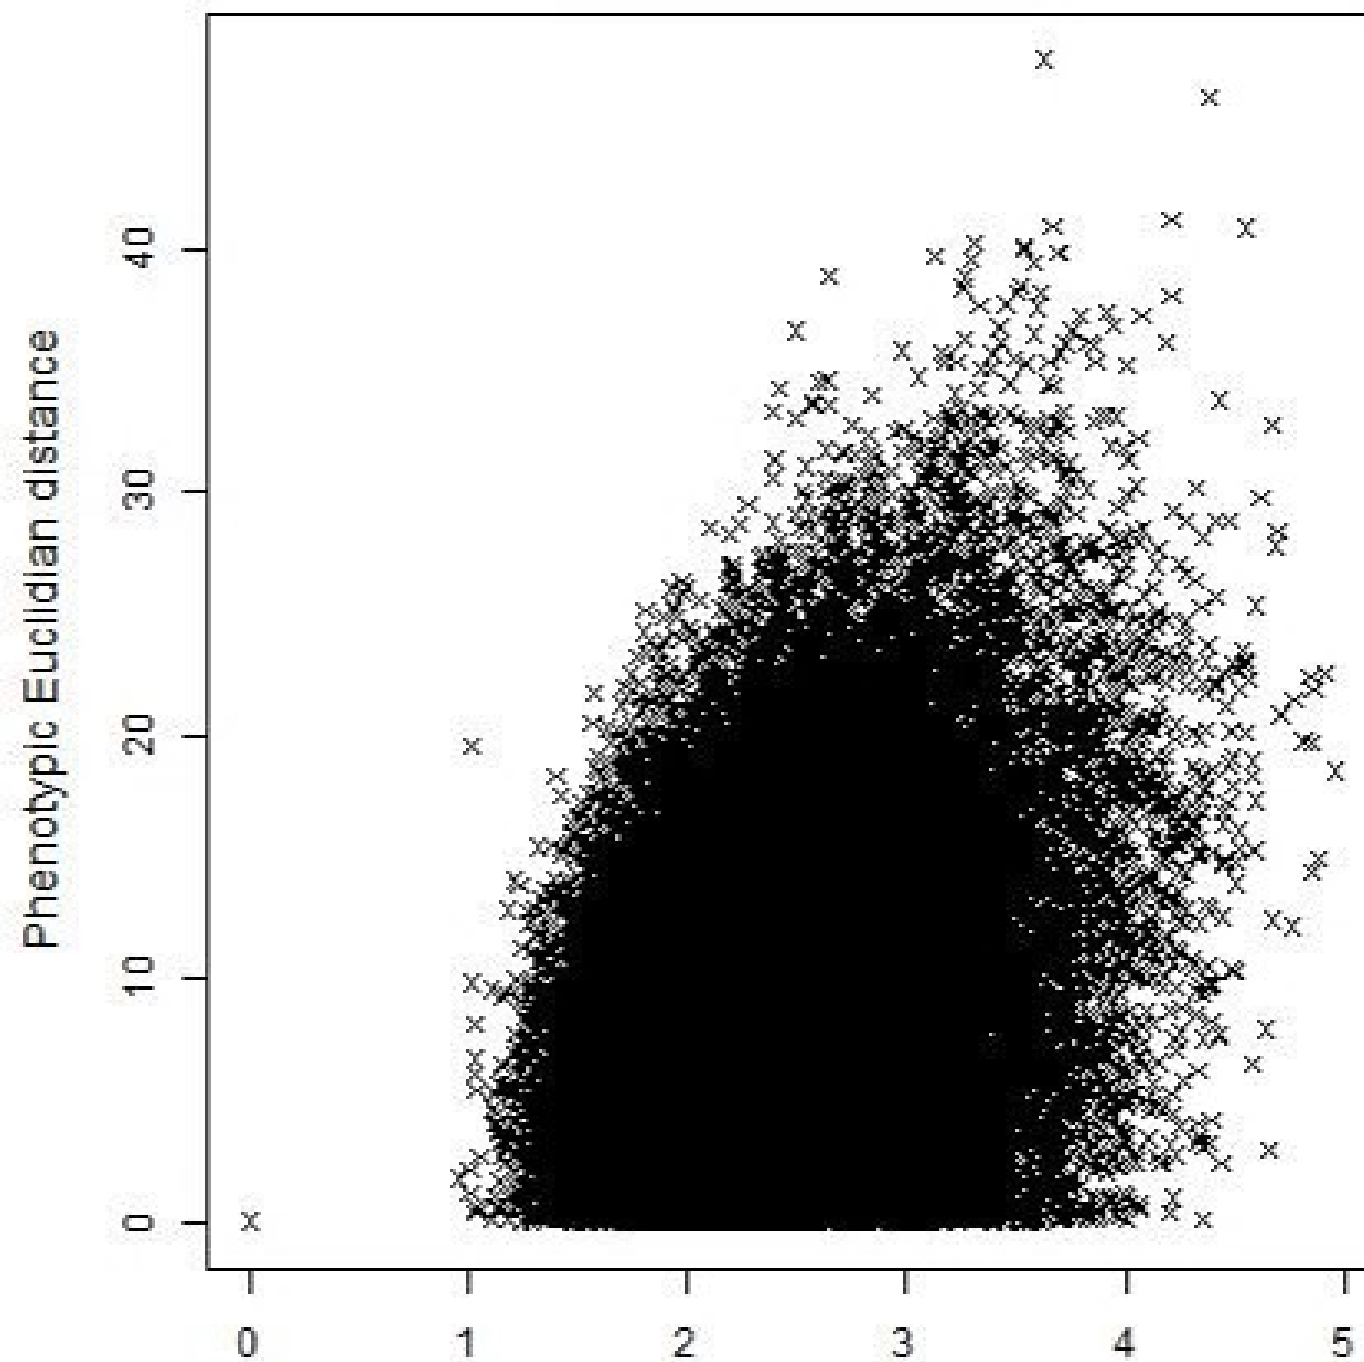

Genetic Euclidian distance (based on the 100 most significantly associated SNPs)

resCHs300\_po16

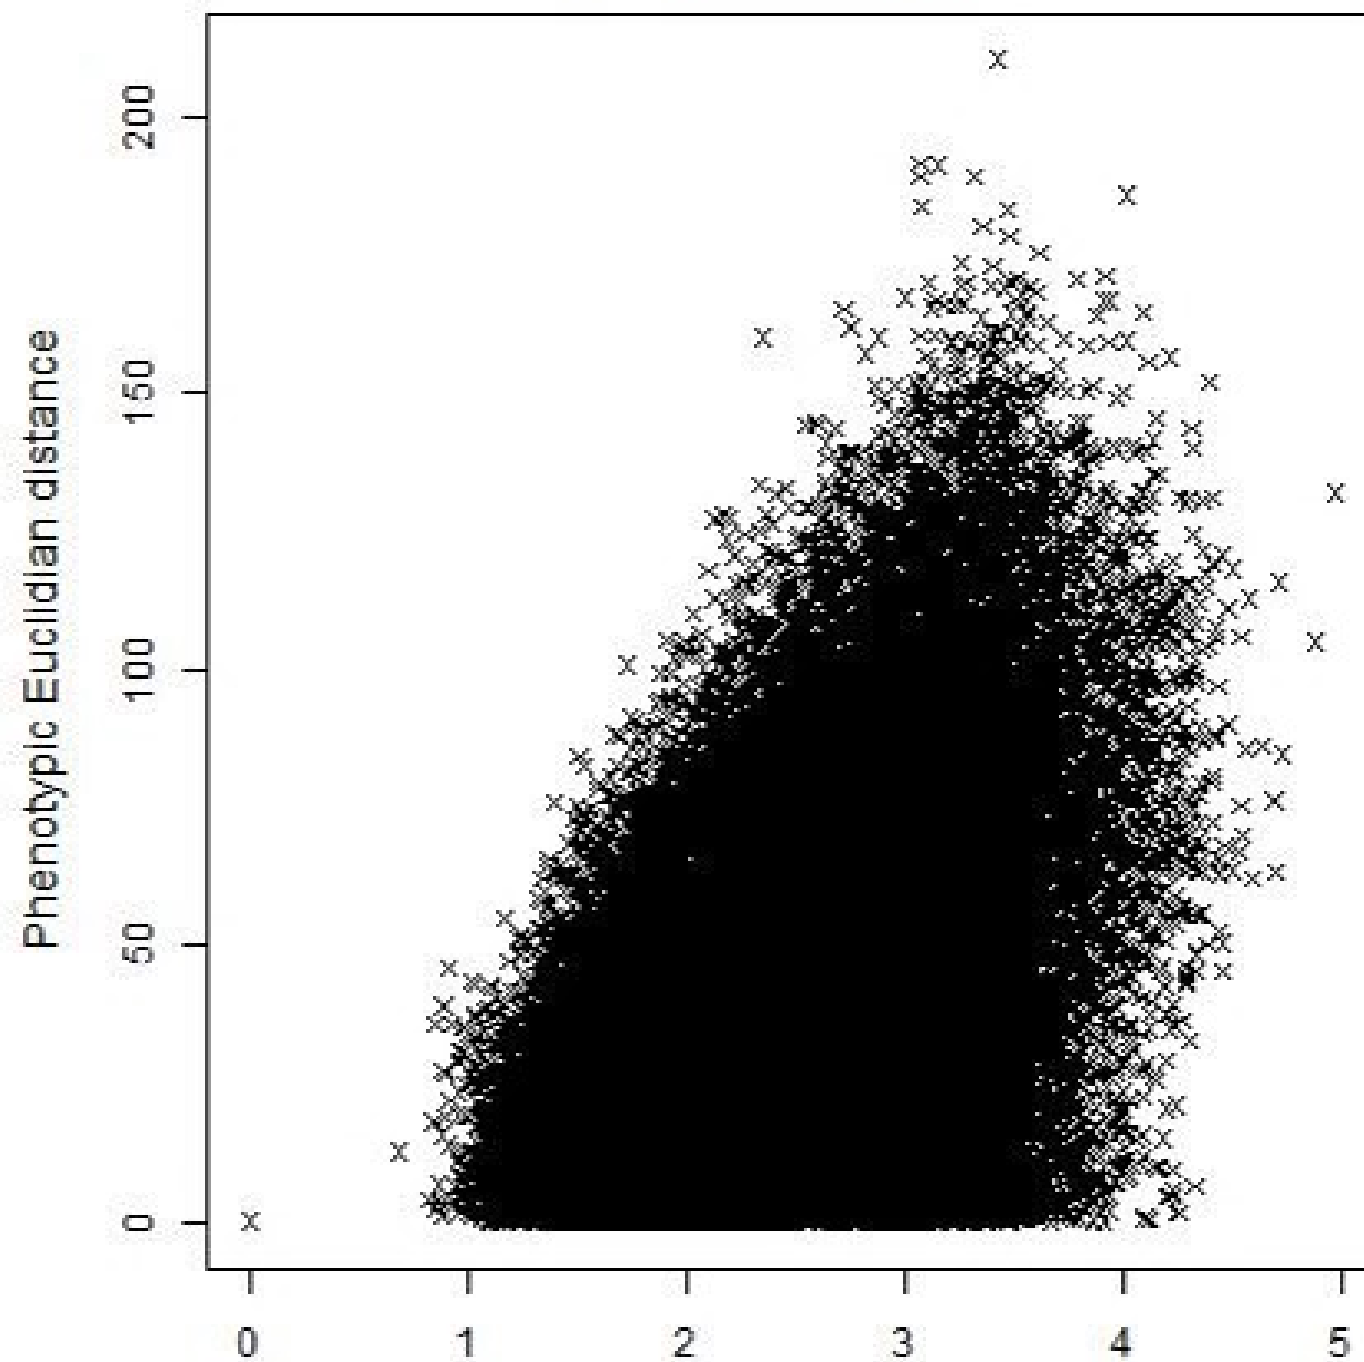

Genetic Euclidian distance (based on the 100 most significantly associated SNPs)



resCHs300\_po17

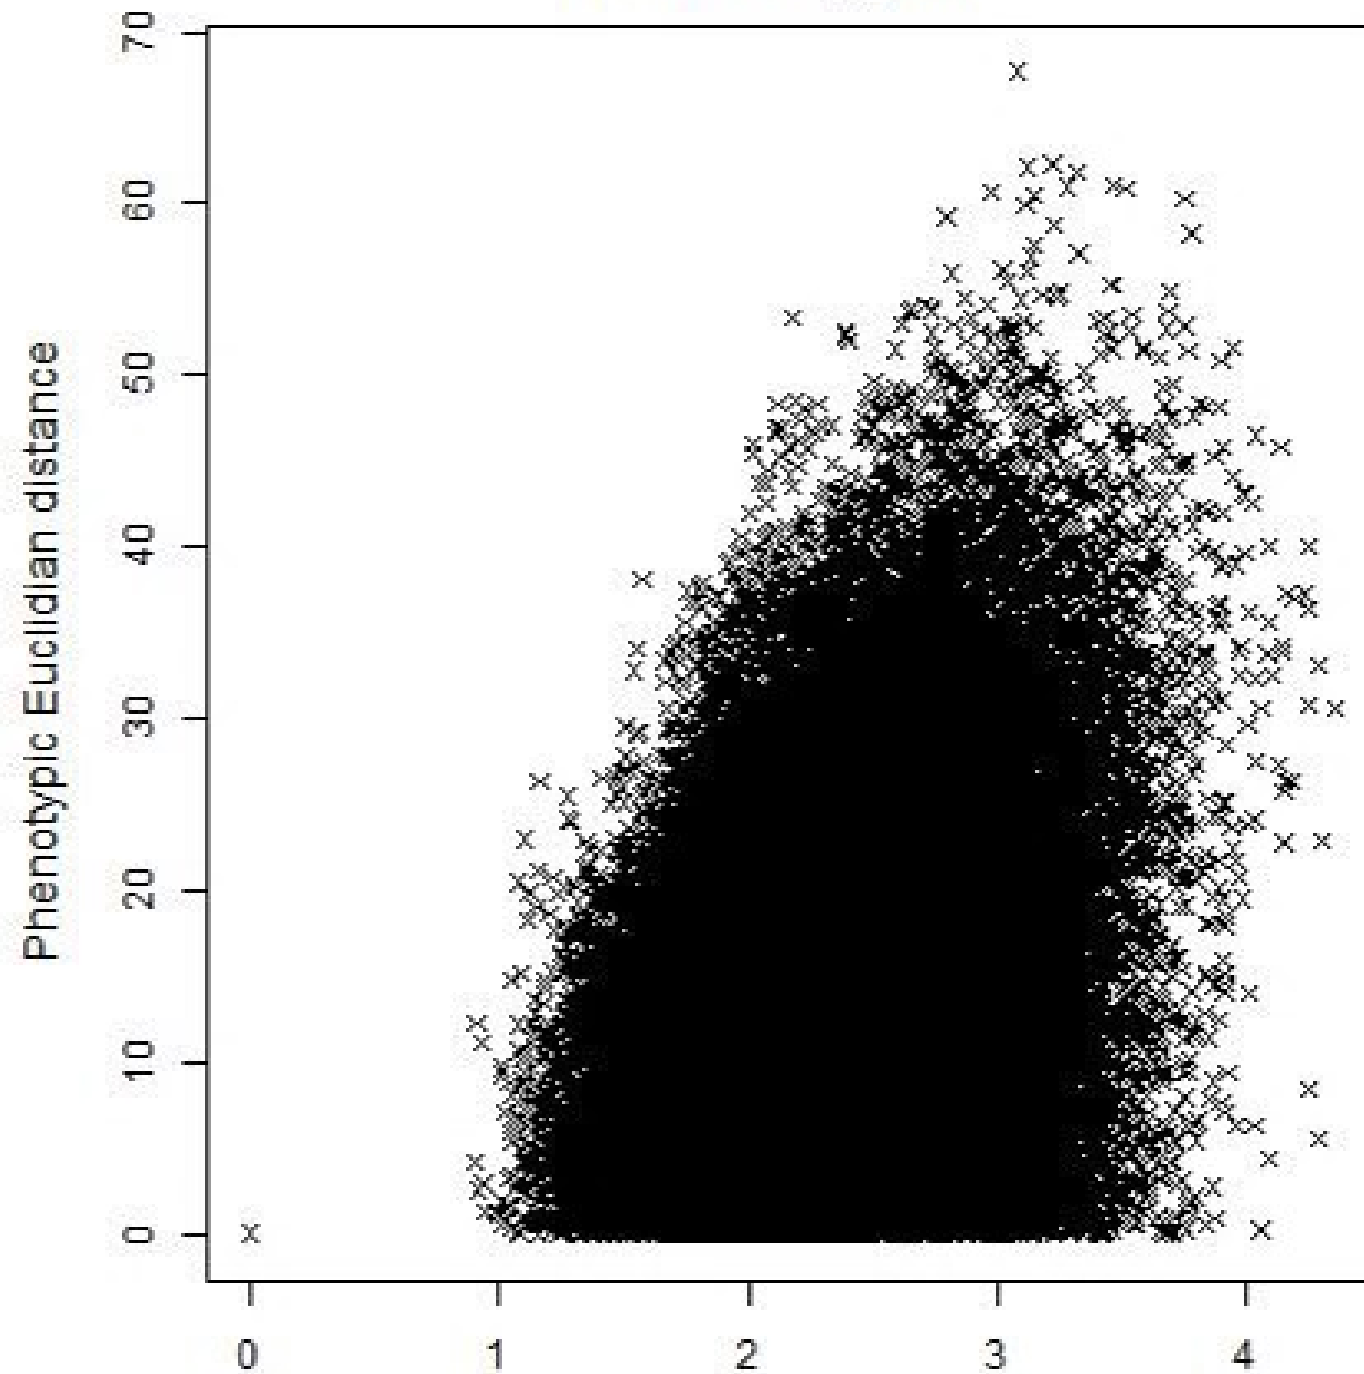

Genetic Euclidian distance (based on the 100 most significantly associated SNPs)

resCHs500\_lu16

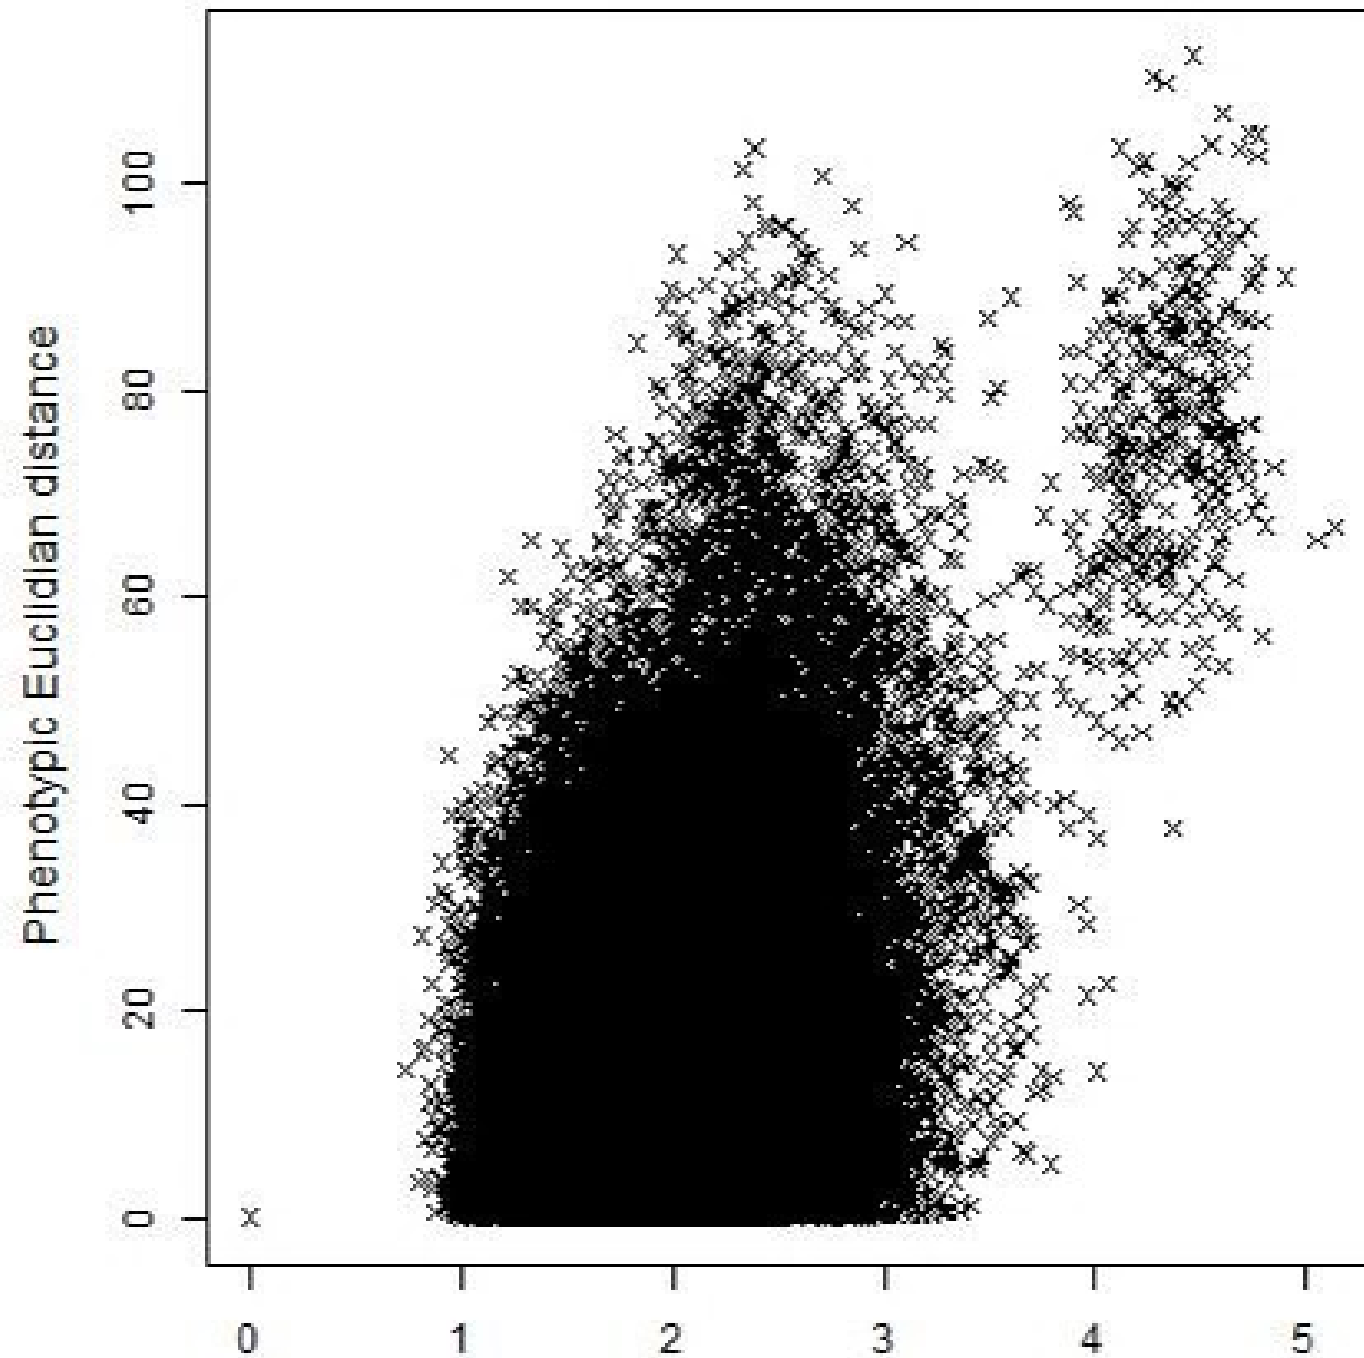

Genetic Euclidian distance (based on the 100 most significantly associated SNPs)

resCHs500\_lu17

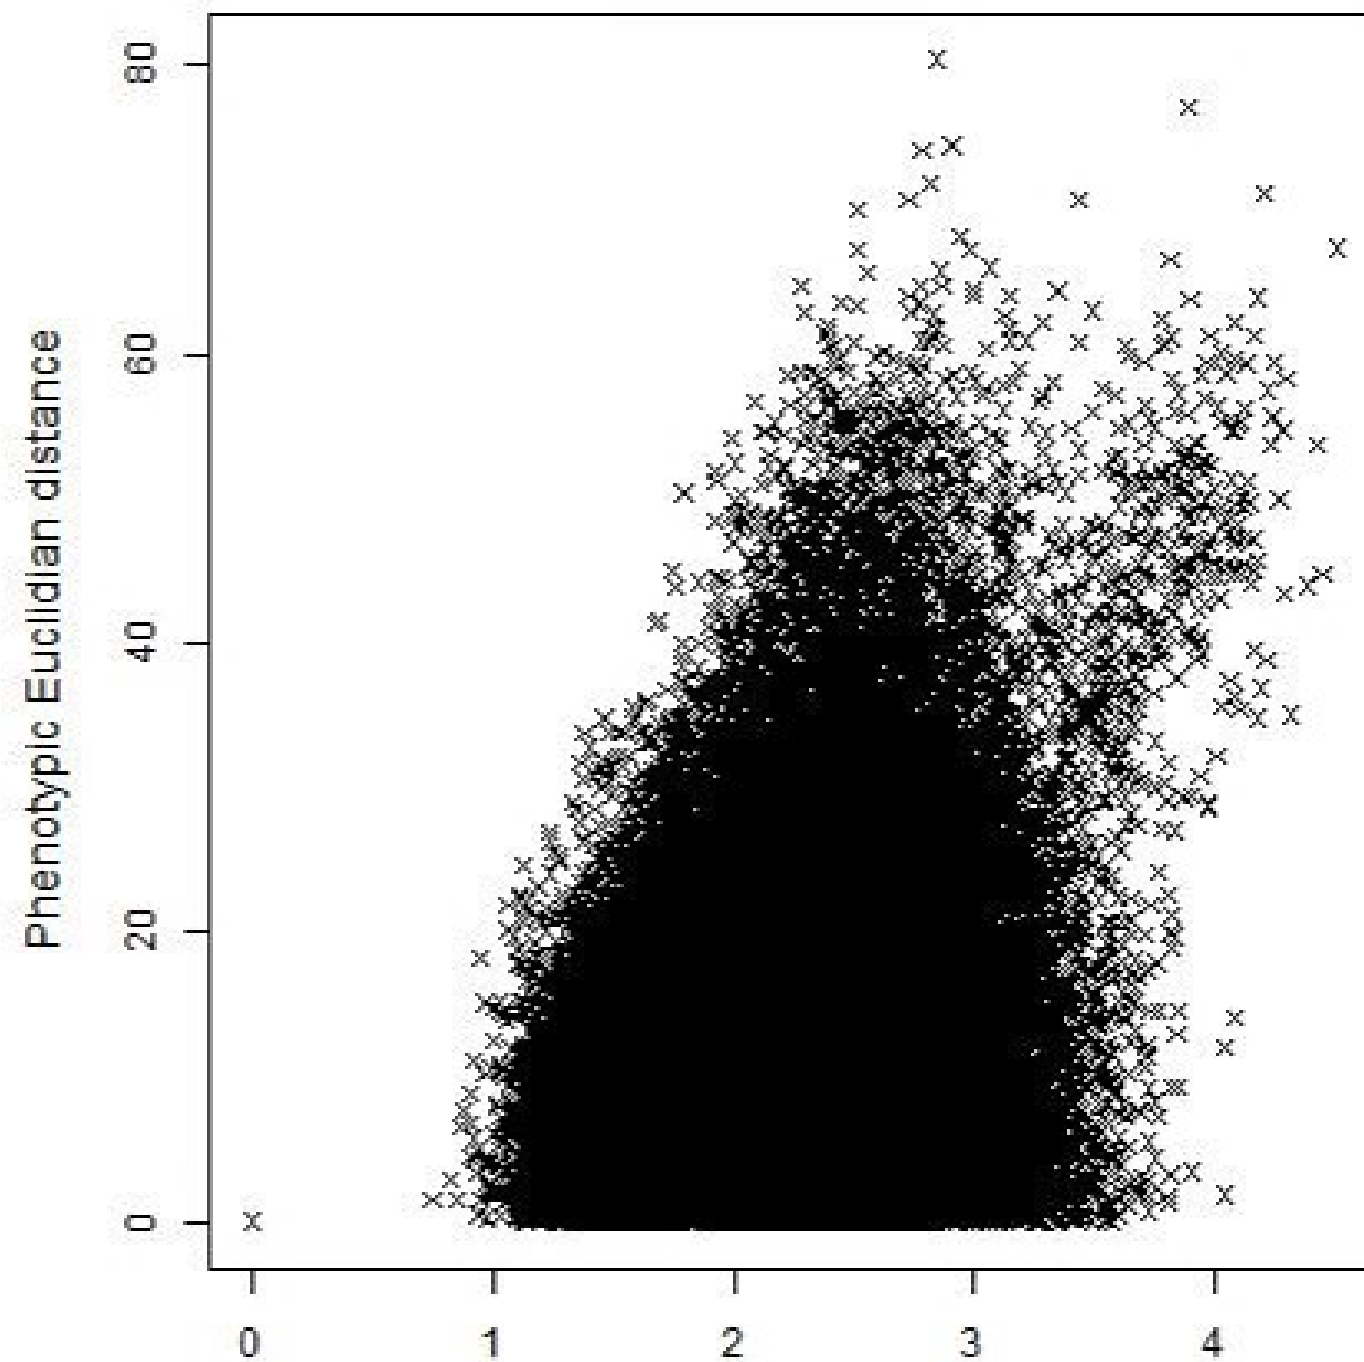

Genetic Euclidian distance (based on the 100 most significantly associated SNPs)

resCHs500\_me16

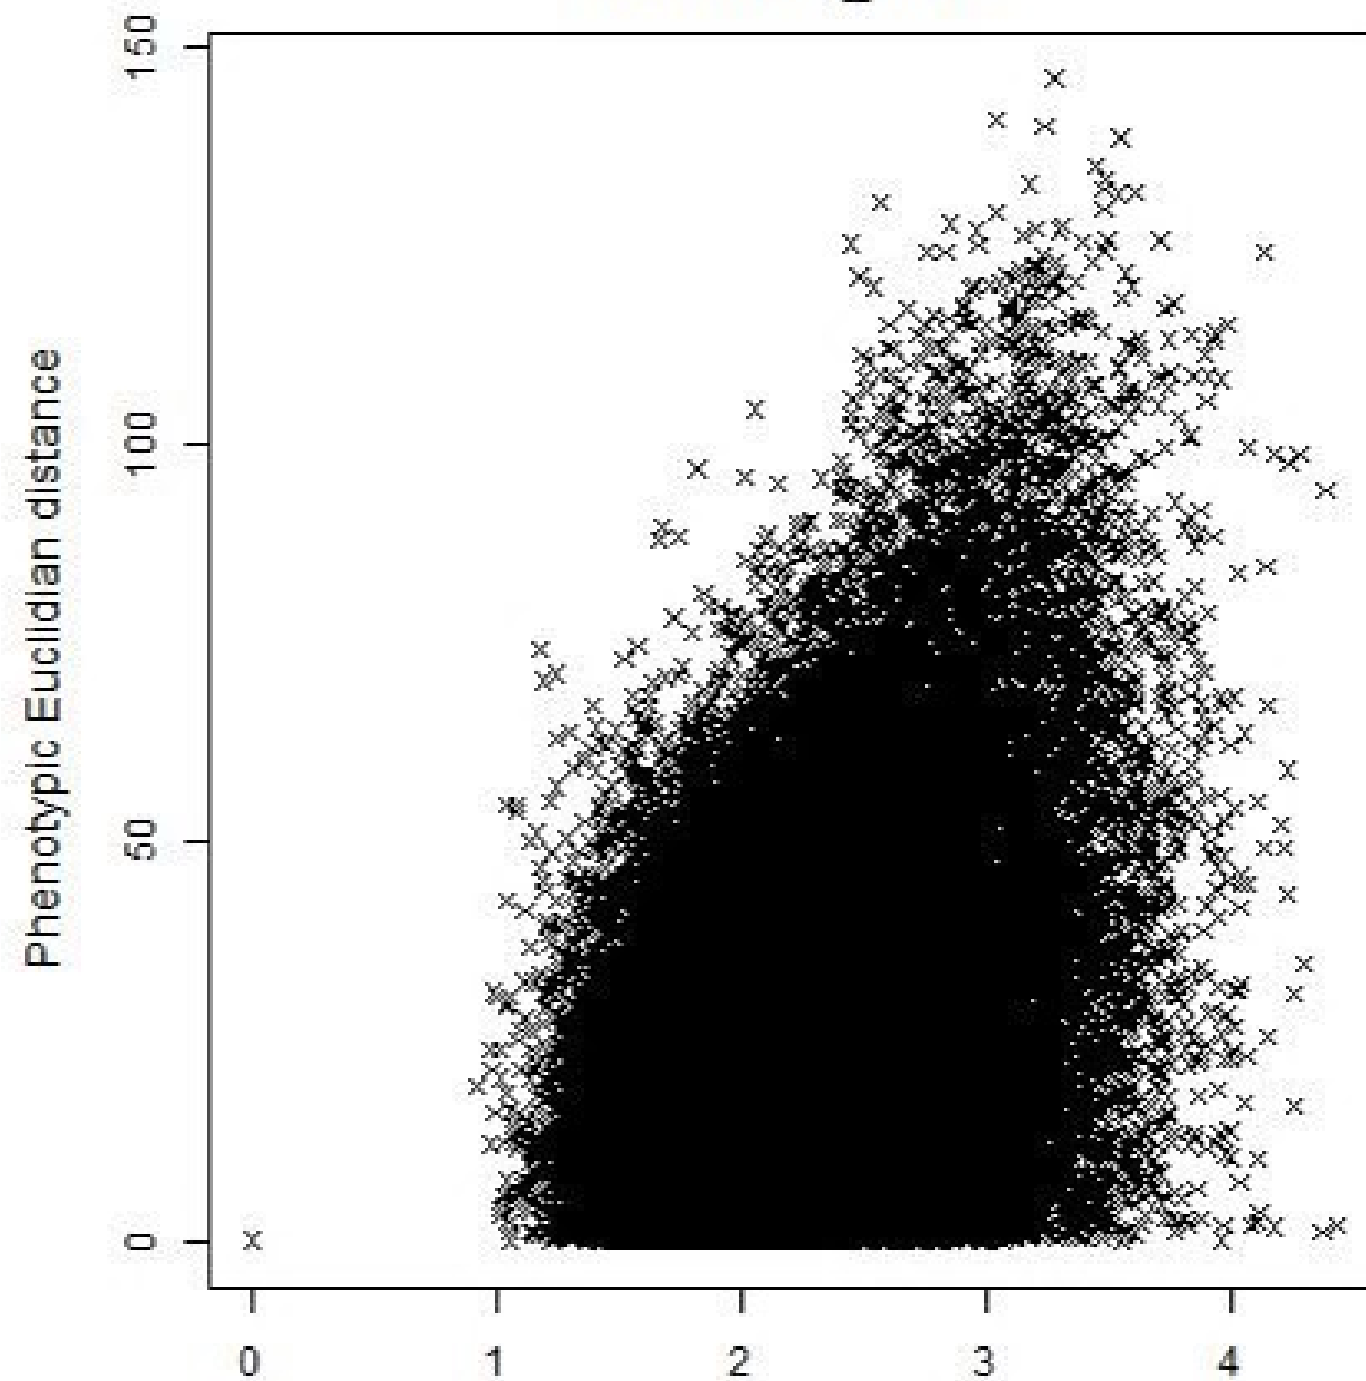

Genetic Euclidian distance (based on the 100 most significantly associated SNPs)

resCHs500\_me17

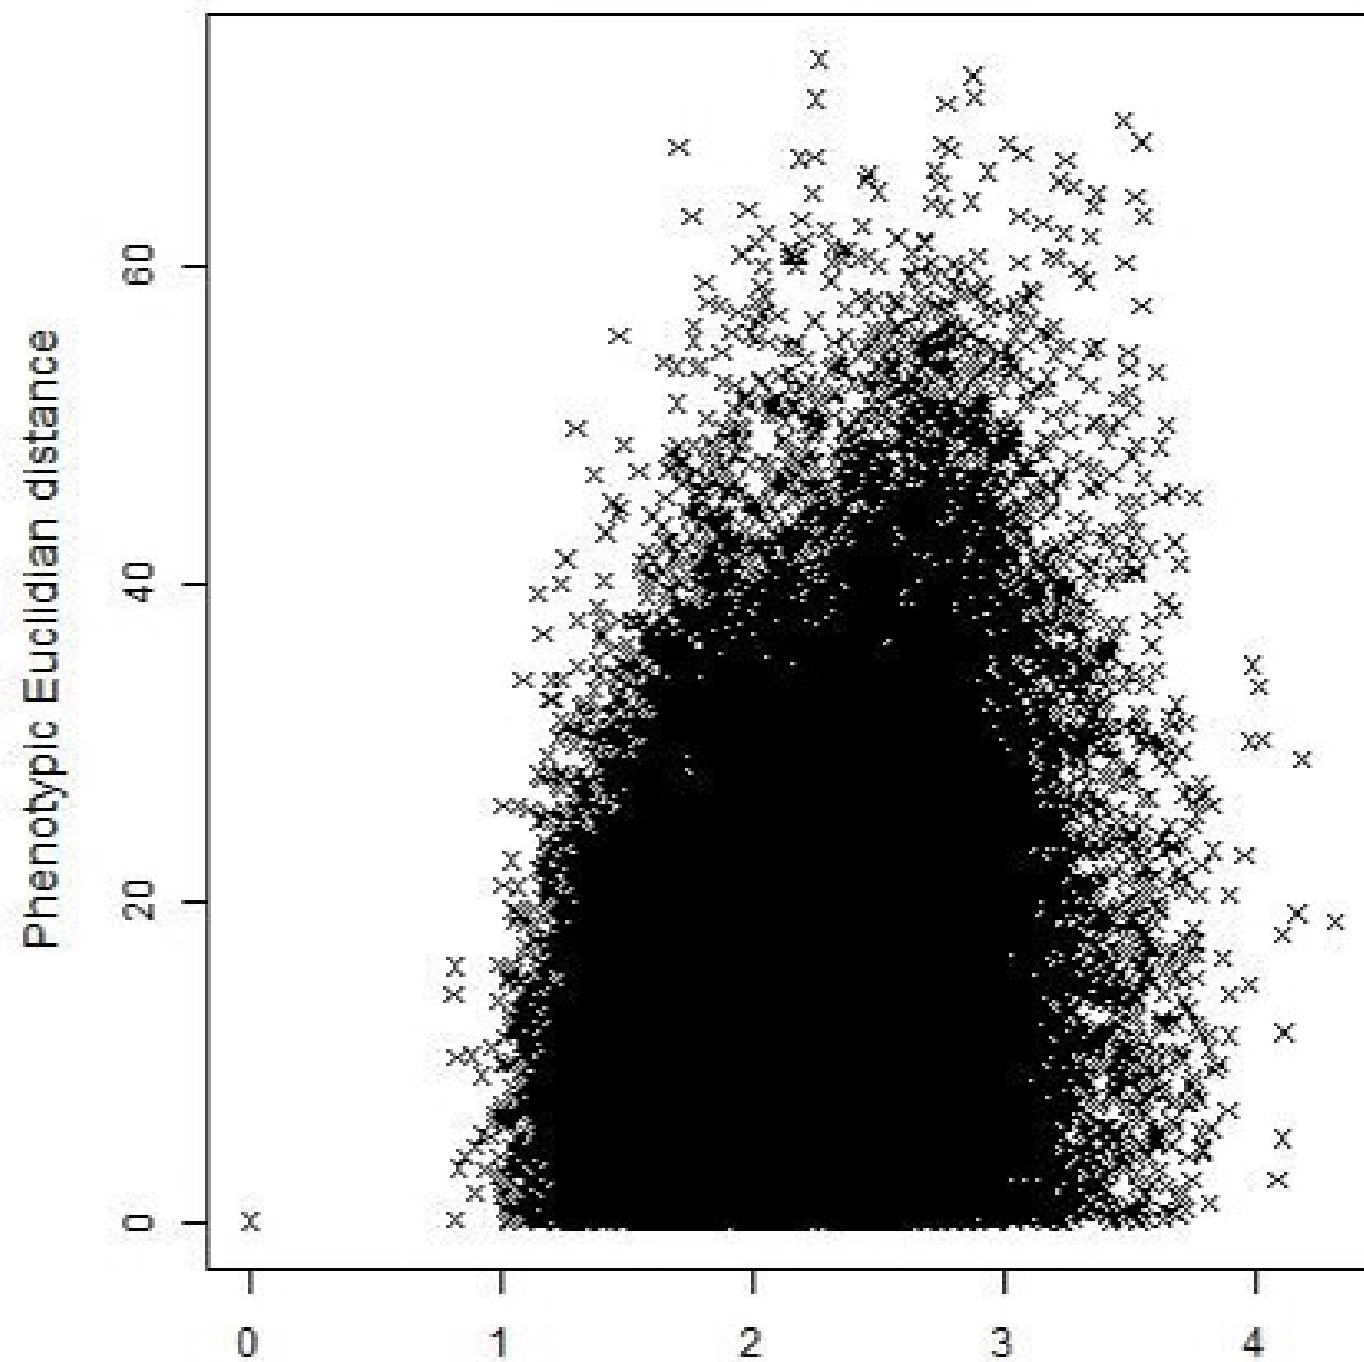

Genetic Euclidian distance (based on the 100 most significantly associated SNPs)

resCHs500\_po17

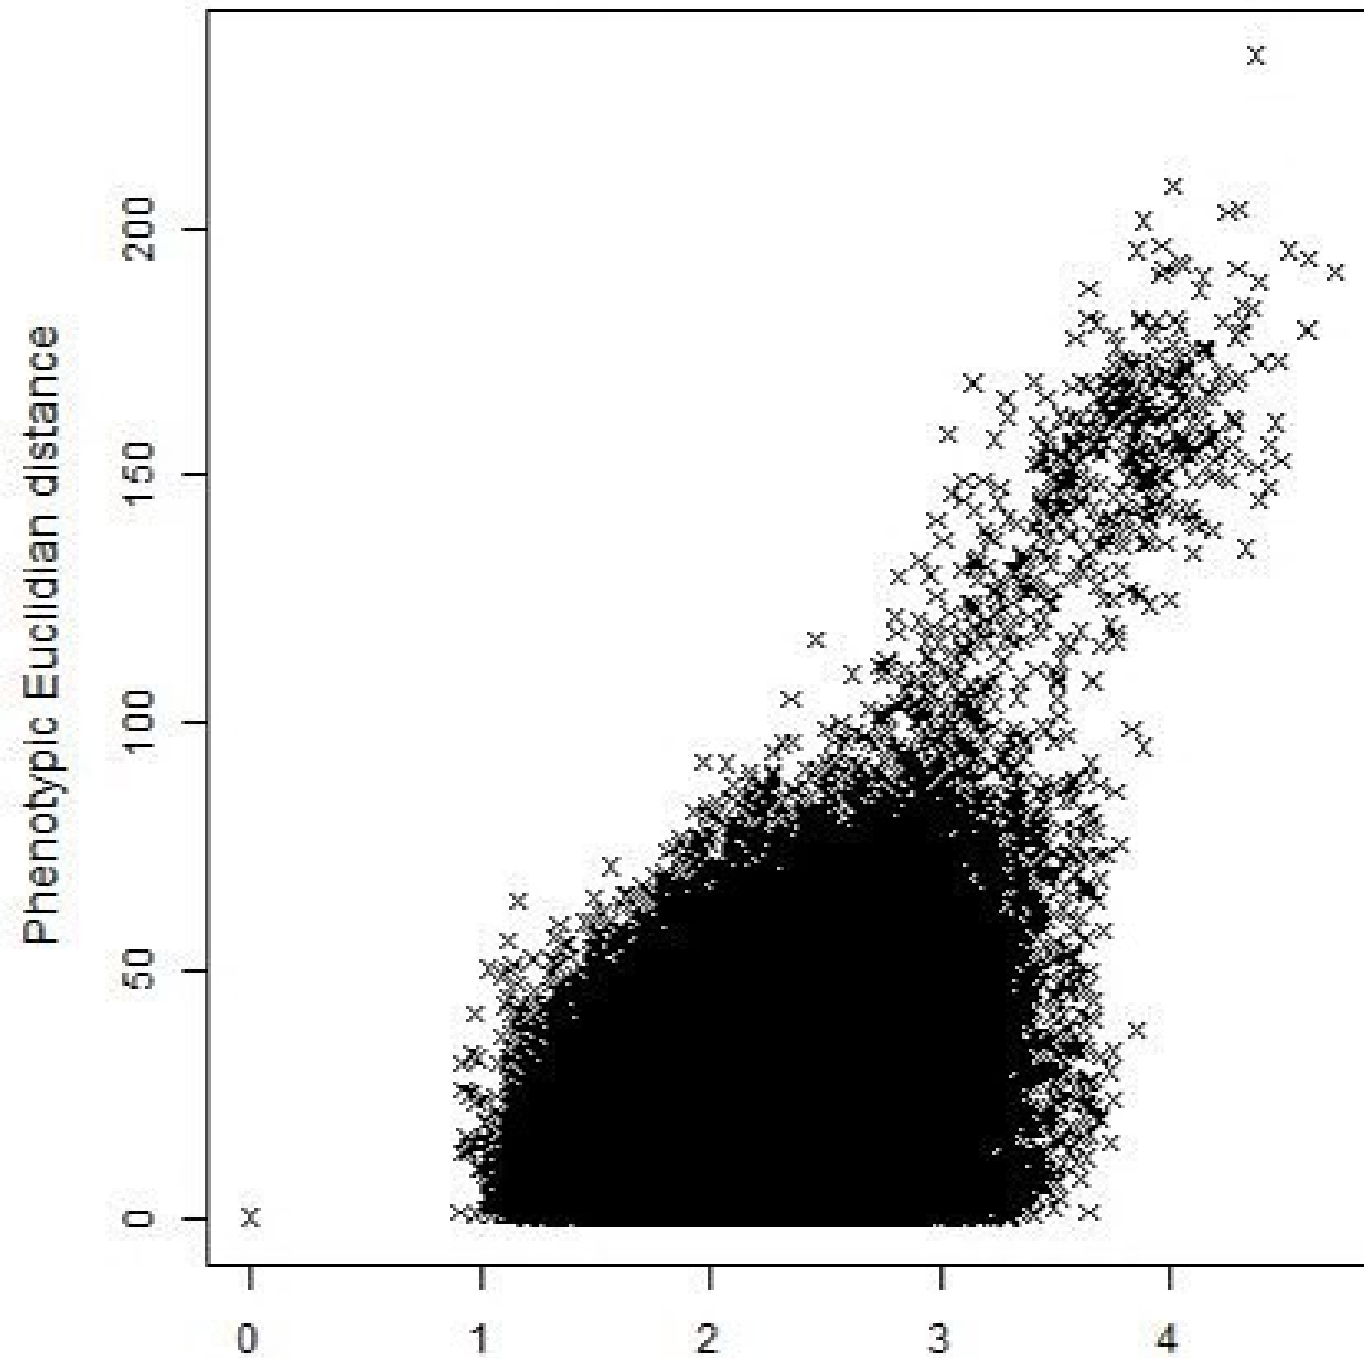

Genetic Euclidian distance (based on the 100 most significantly associated SNPs)

resDST\_lu17

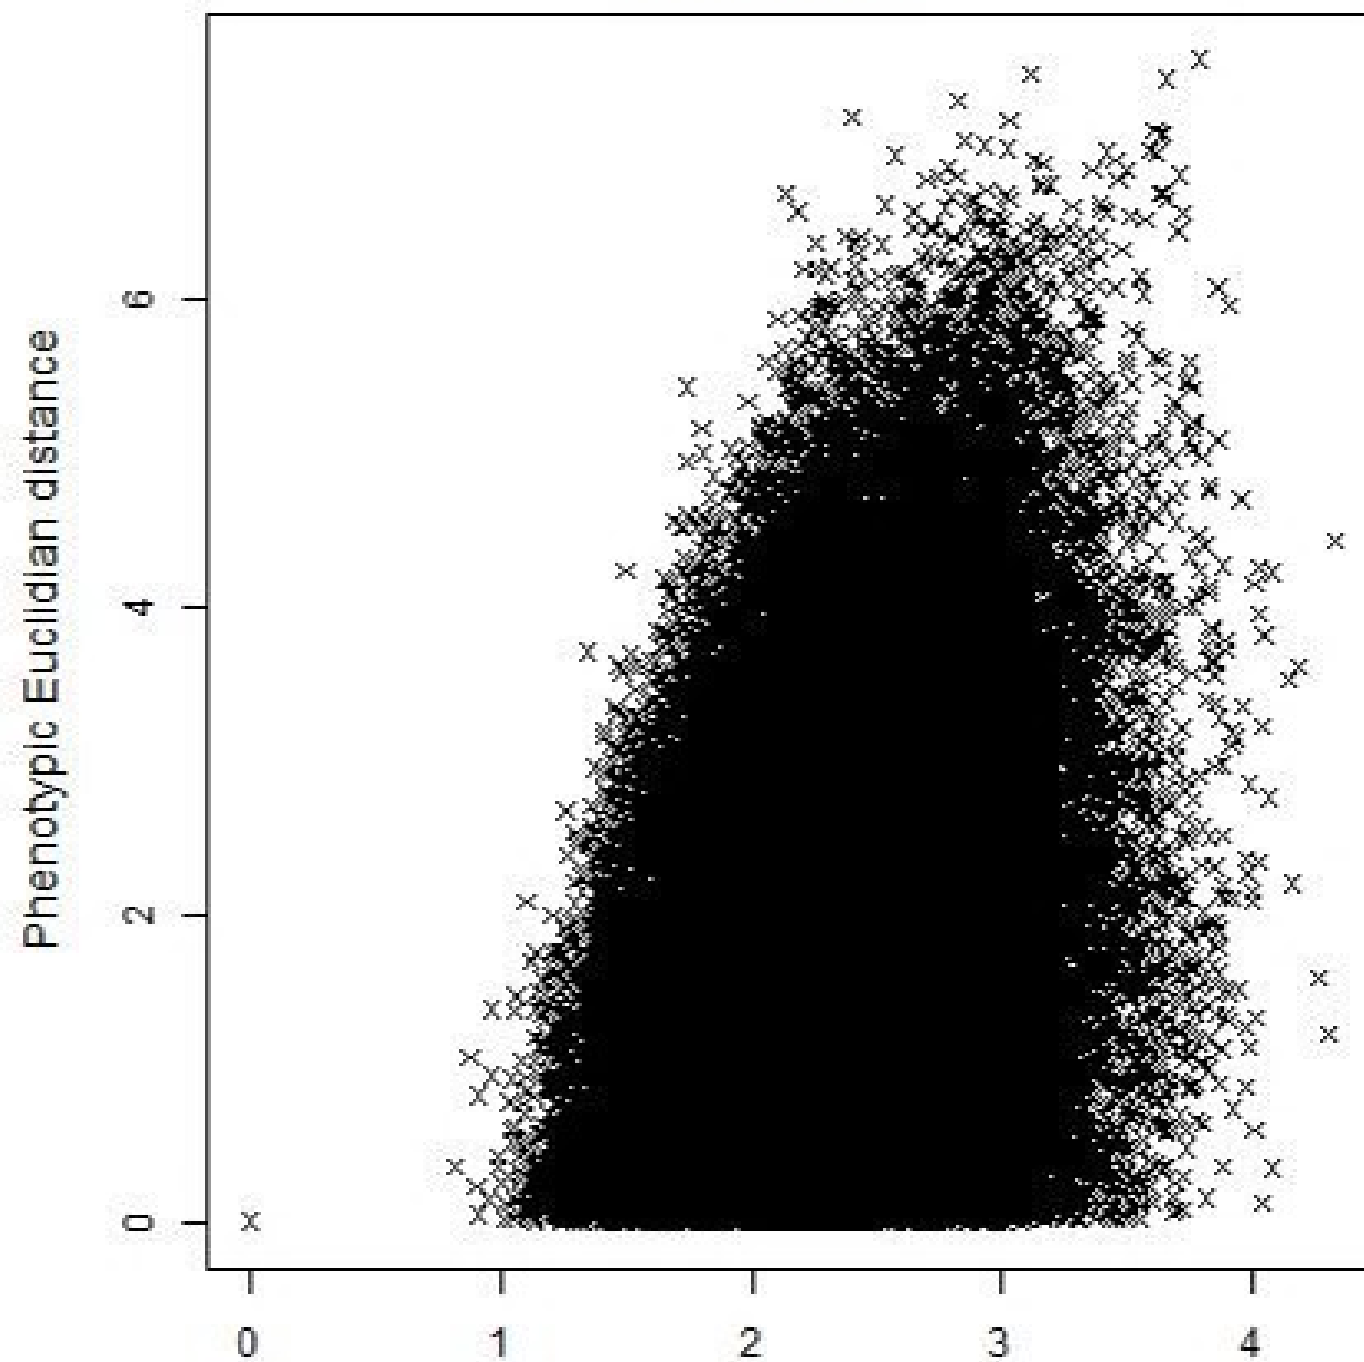

Genetic Euclidian distance (based on the 100 most significantly associated SNPs)

SCD\_15to17\_po

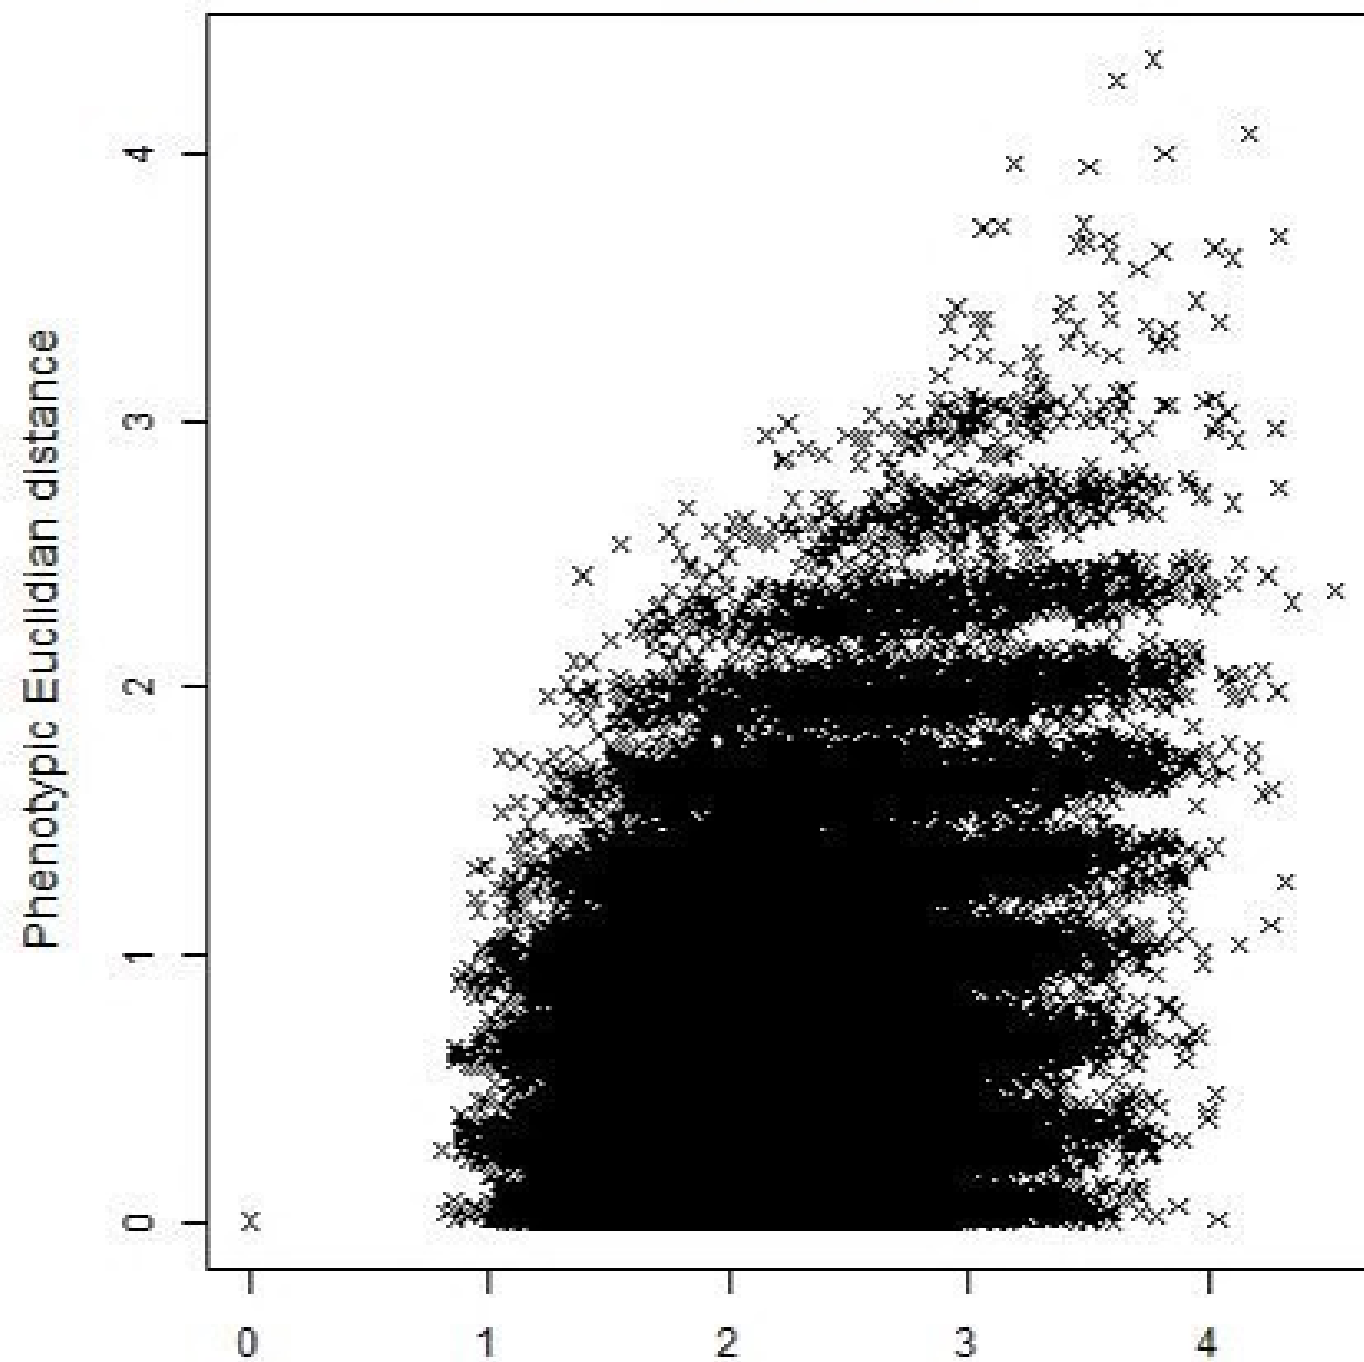

Genetic Euclidian distance (based on the 100 most significantly associated SNPs)



# SCD\_15to18\_lu

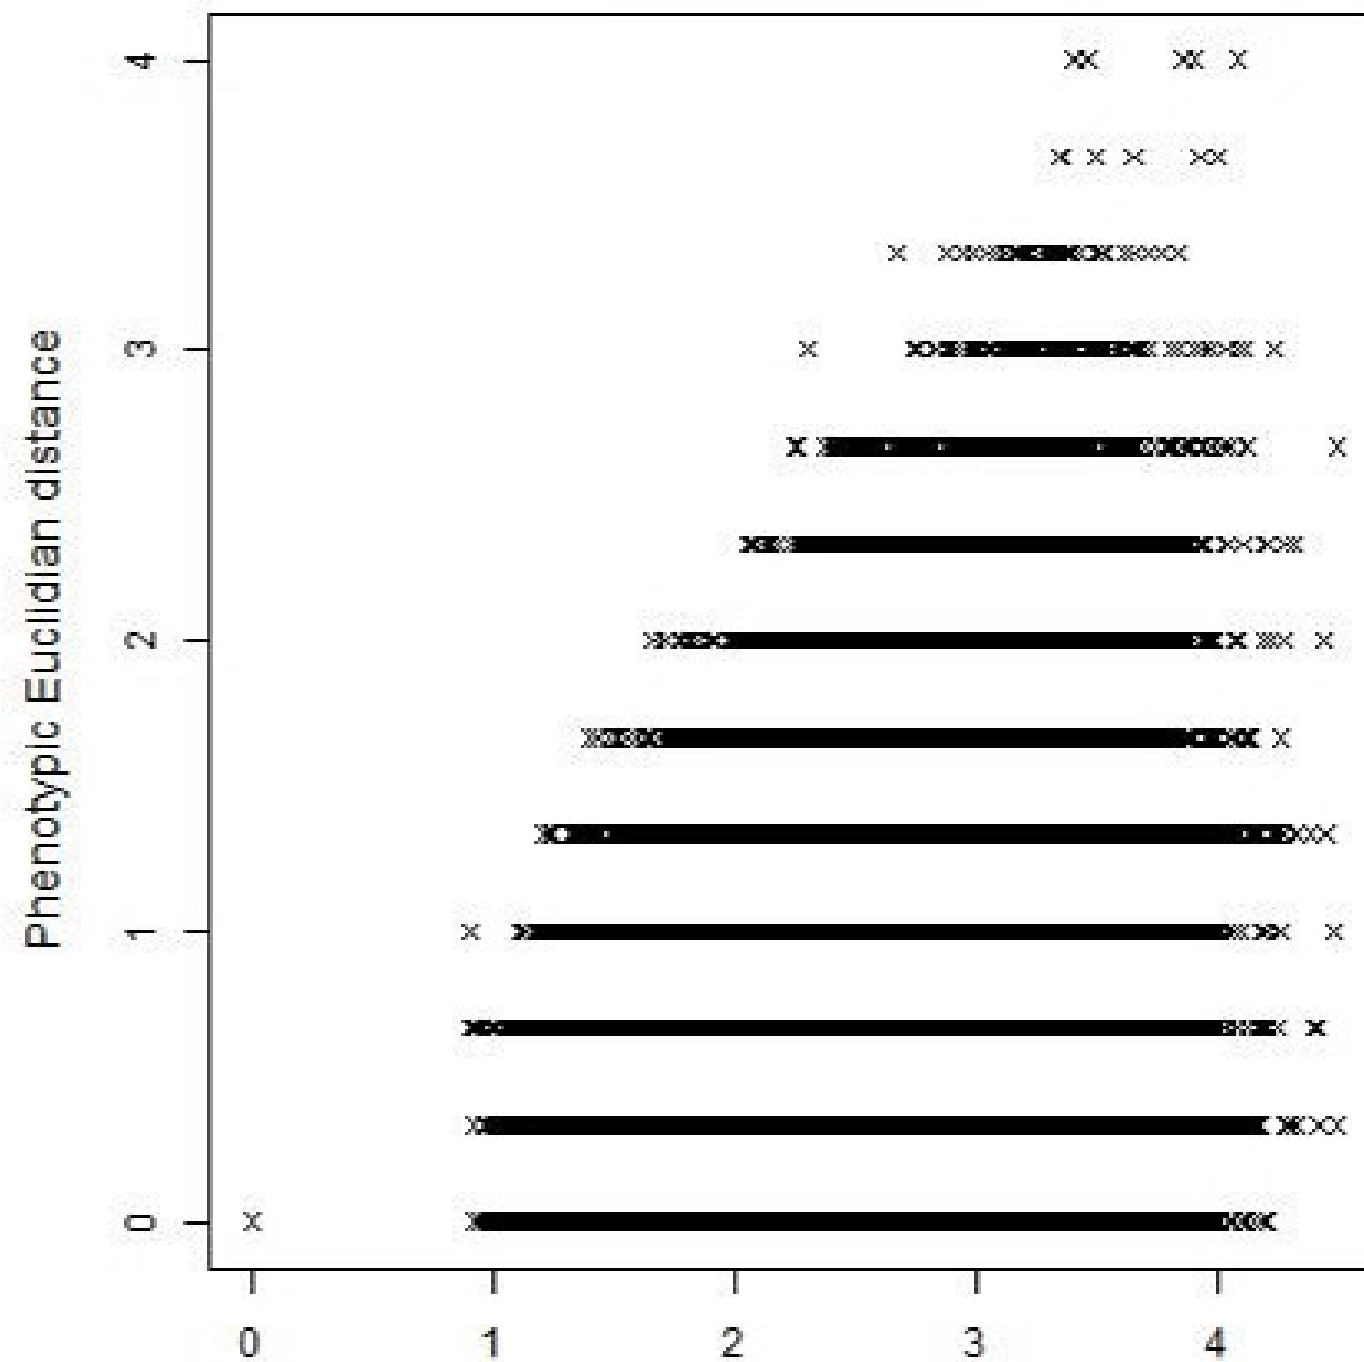

Genetic Euclidian distance (based on the 100 most significantly associated SNPs)

SCD\_16to17\_me

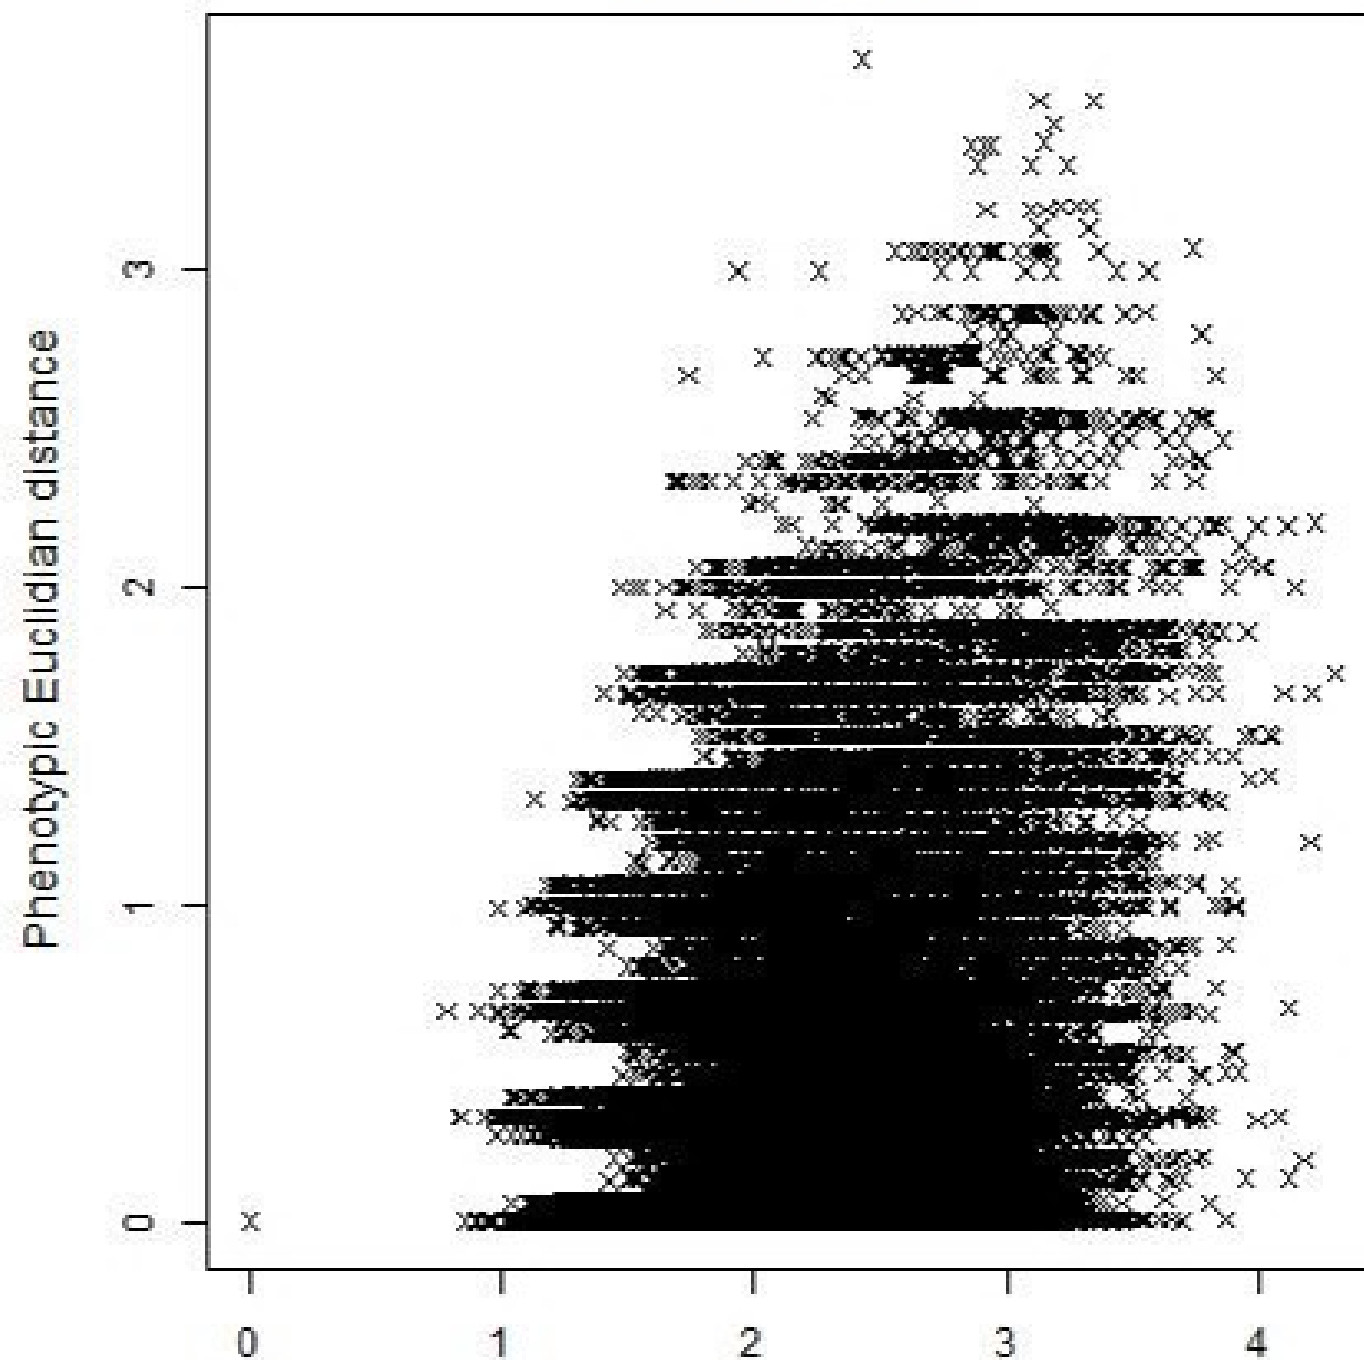

Genetic Euclidian distance (based on the 100 most significantly associated SNPs)

# SCD\_su15\_lu

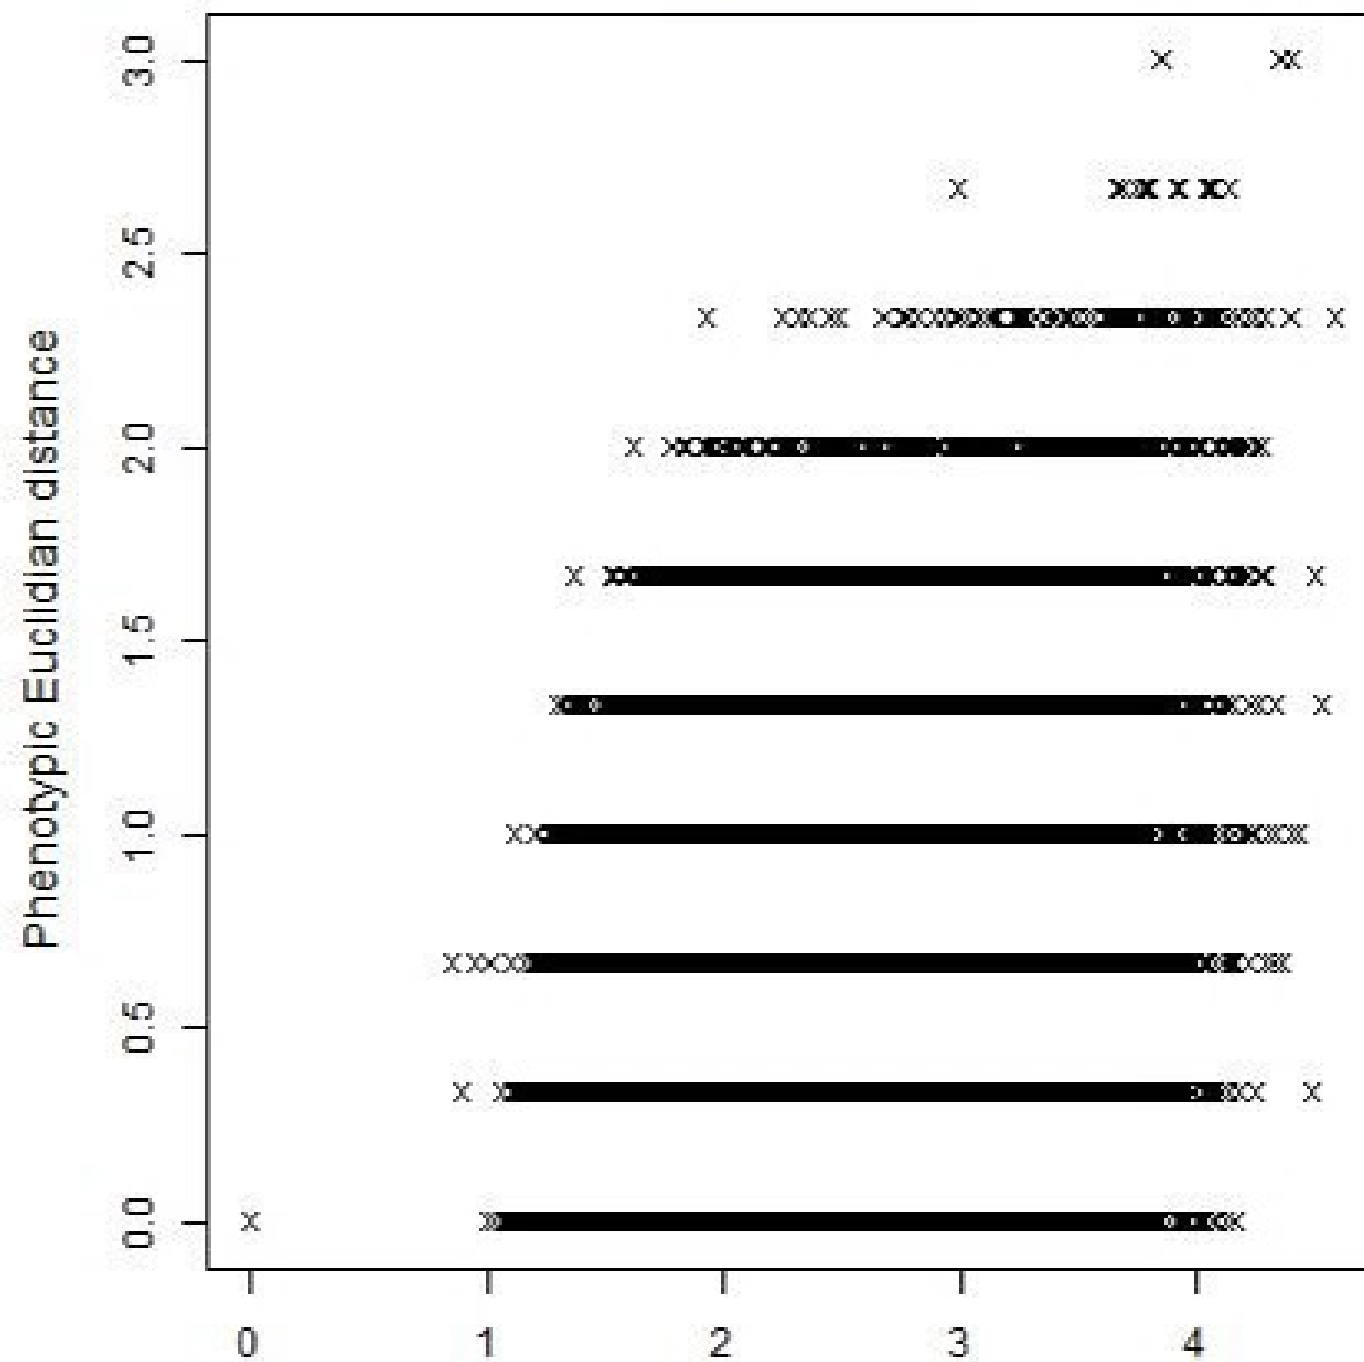

Genetic Euclidian distance (based on the 100 most significantly associated SNPs)

# SCD\_su16\_lu

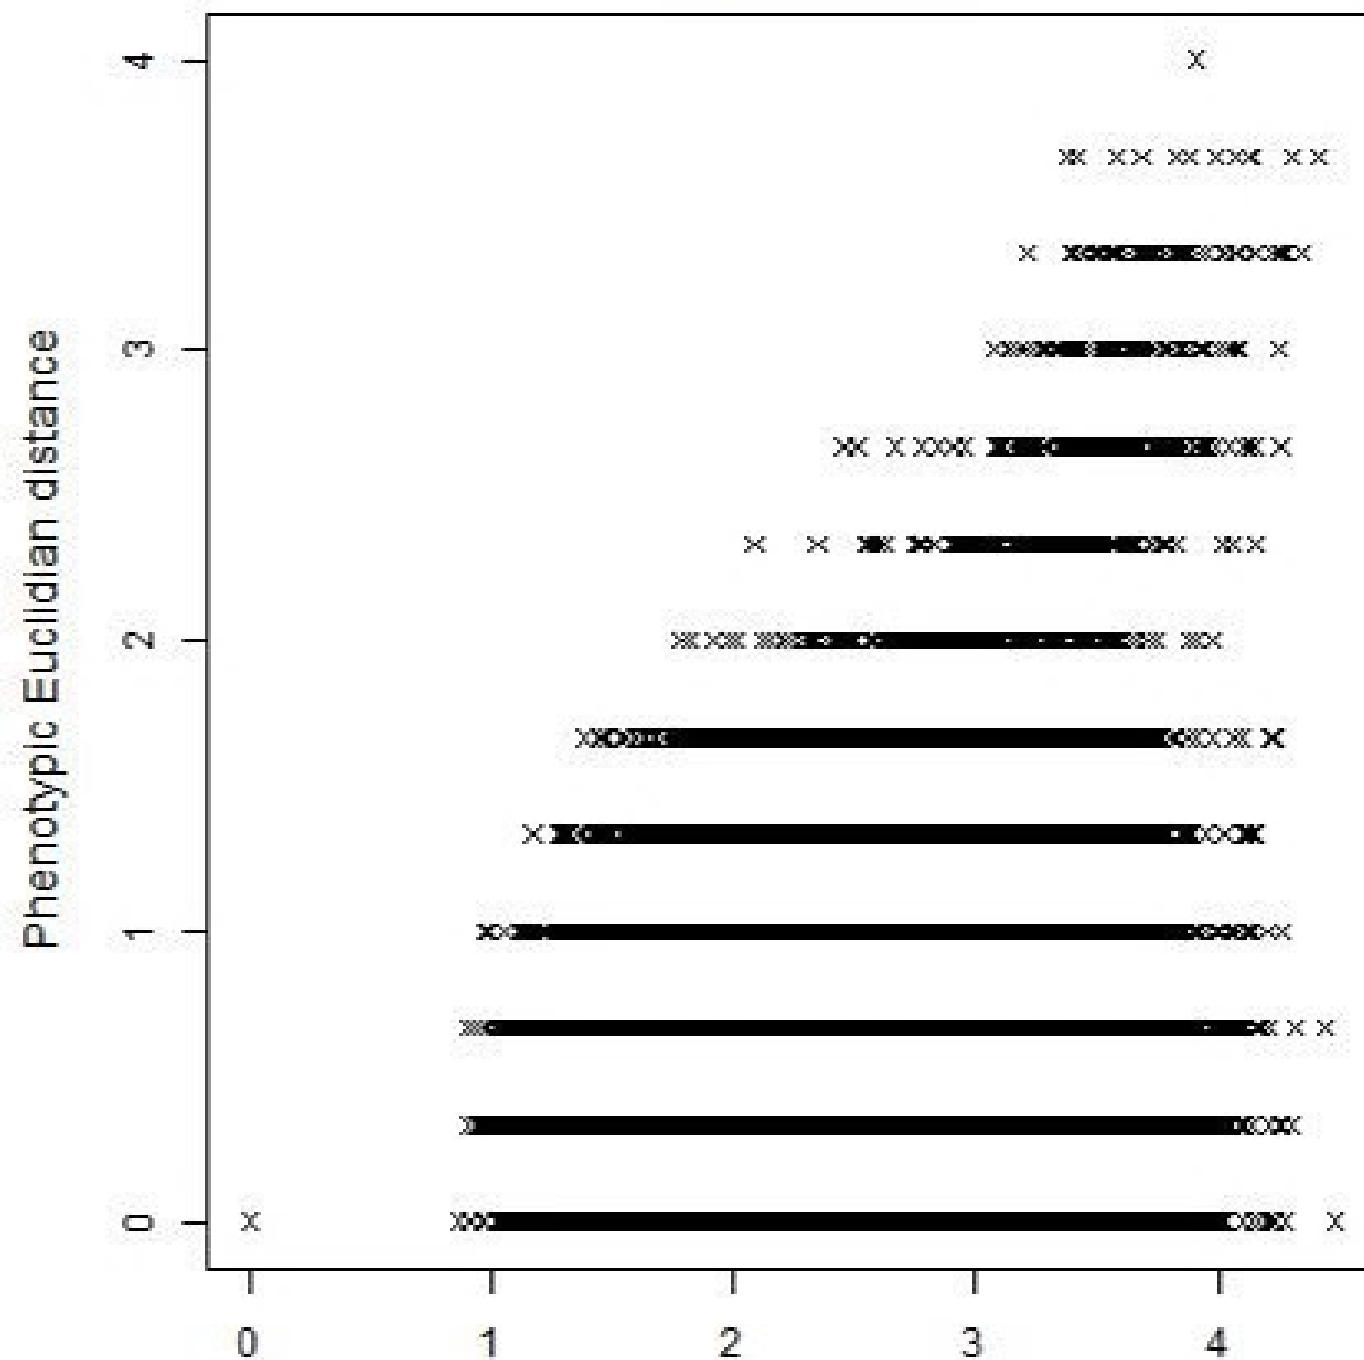

Genetic Euclidian distance (based on the 100 most significantly associated SNPs)

# SCD\_su17\_lu

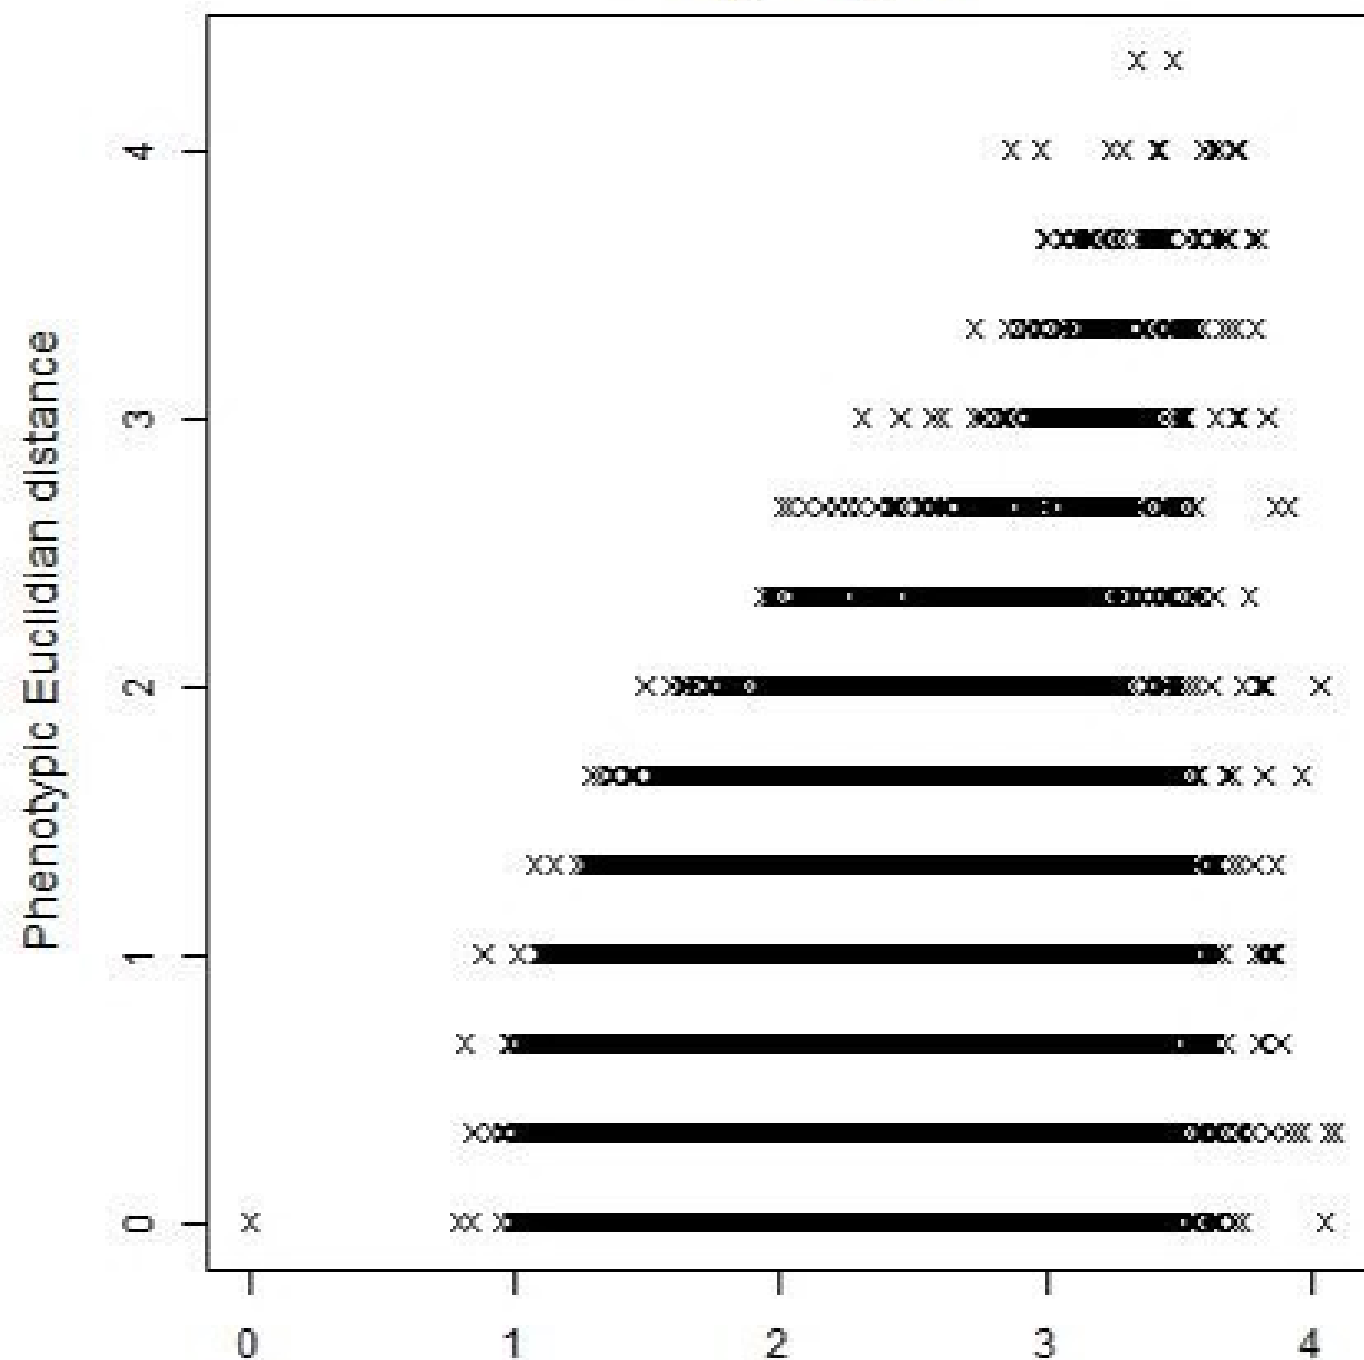

Genetic Euclidian distance (based on the 100 most significantly associated SNPs)

# SCD\_su17\_me

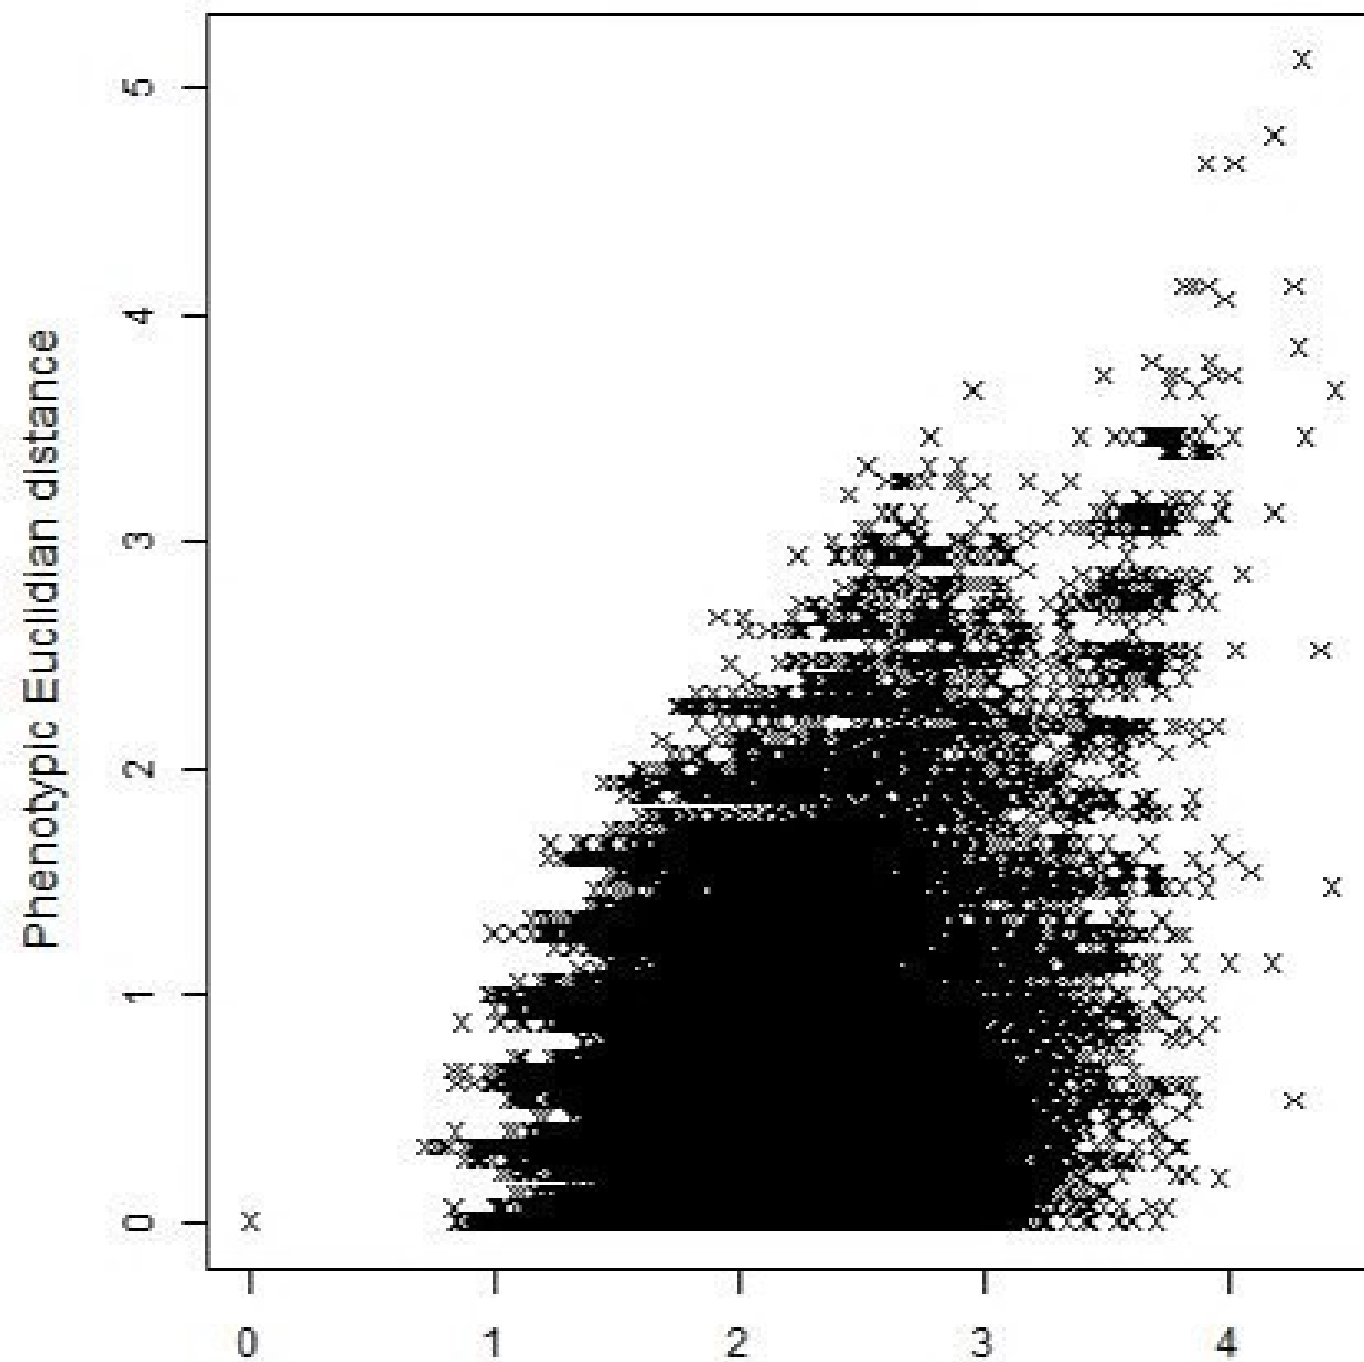

Genetic Euclidian distance (based on the 100 most significantly associated SNPs)

# SCD\_wi1516\_lu

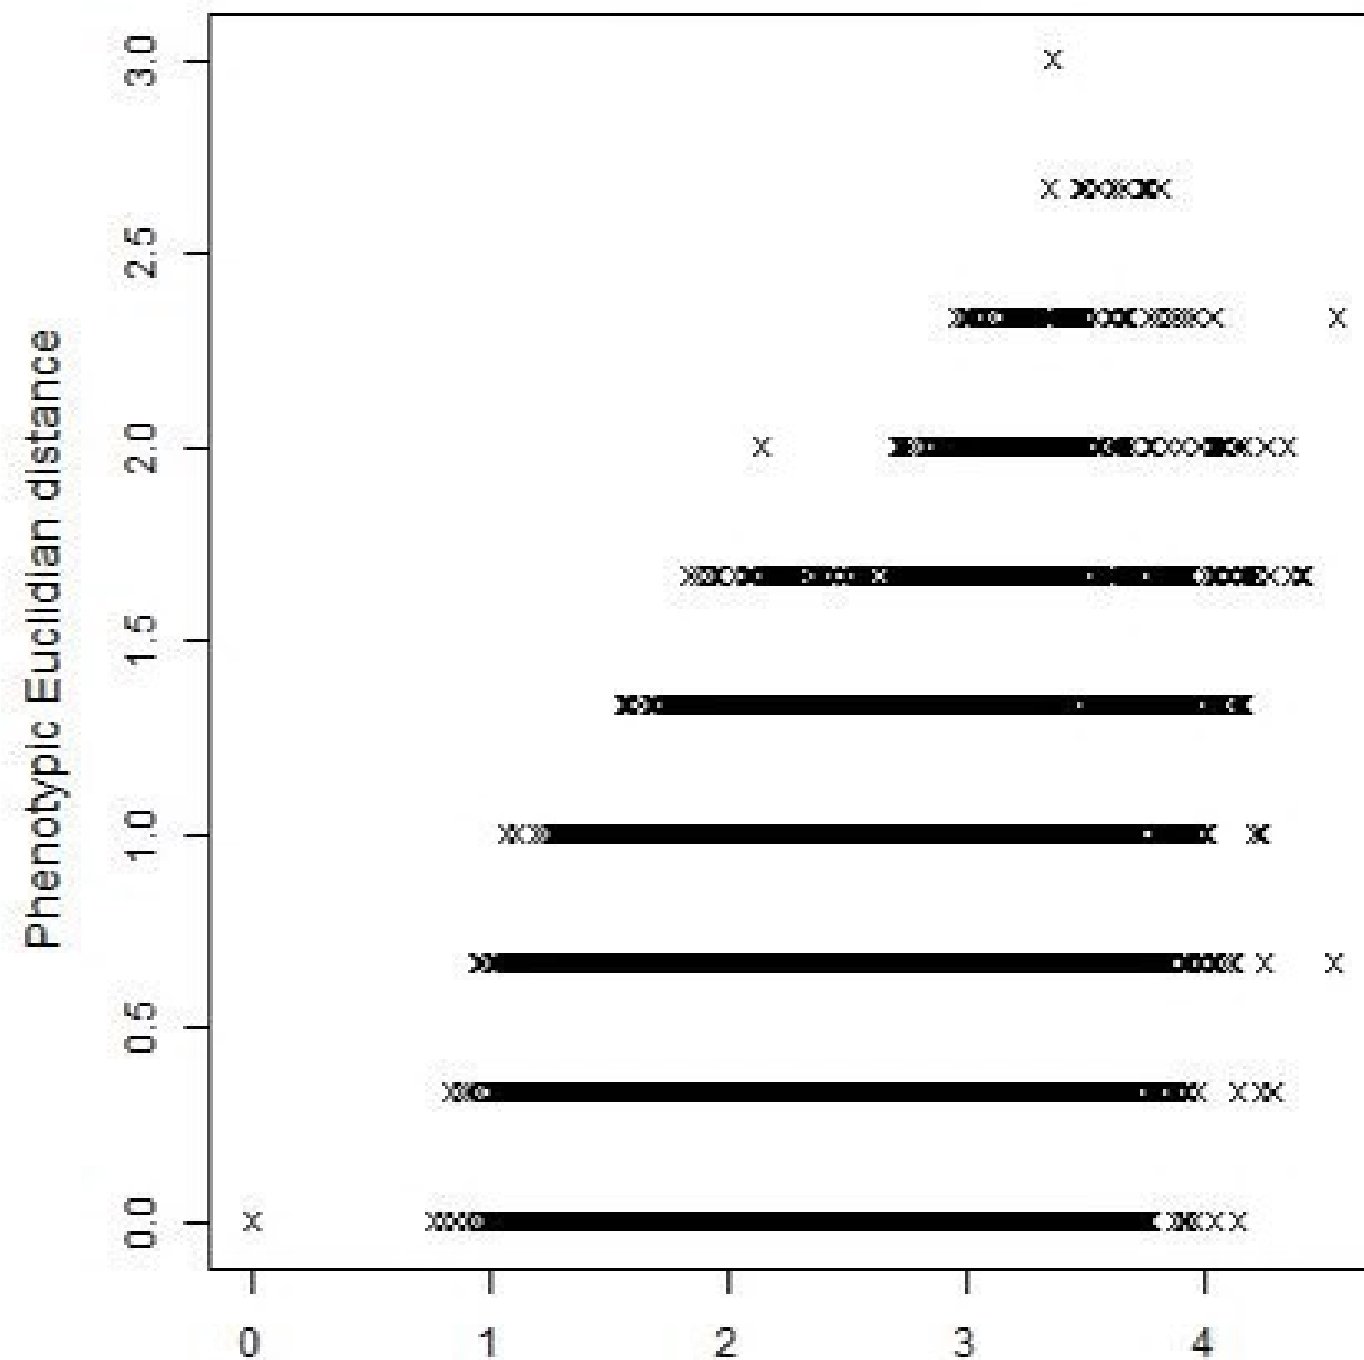

Genetic Euclidian distance (based on the 100 most significantly associated SNPs)

SCD\_wi1516\_po

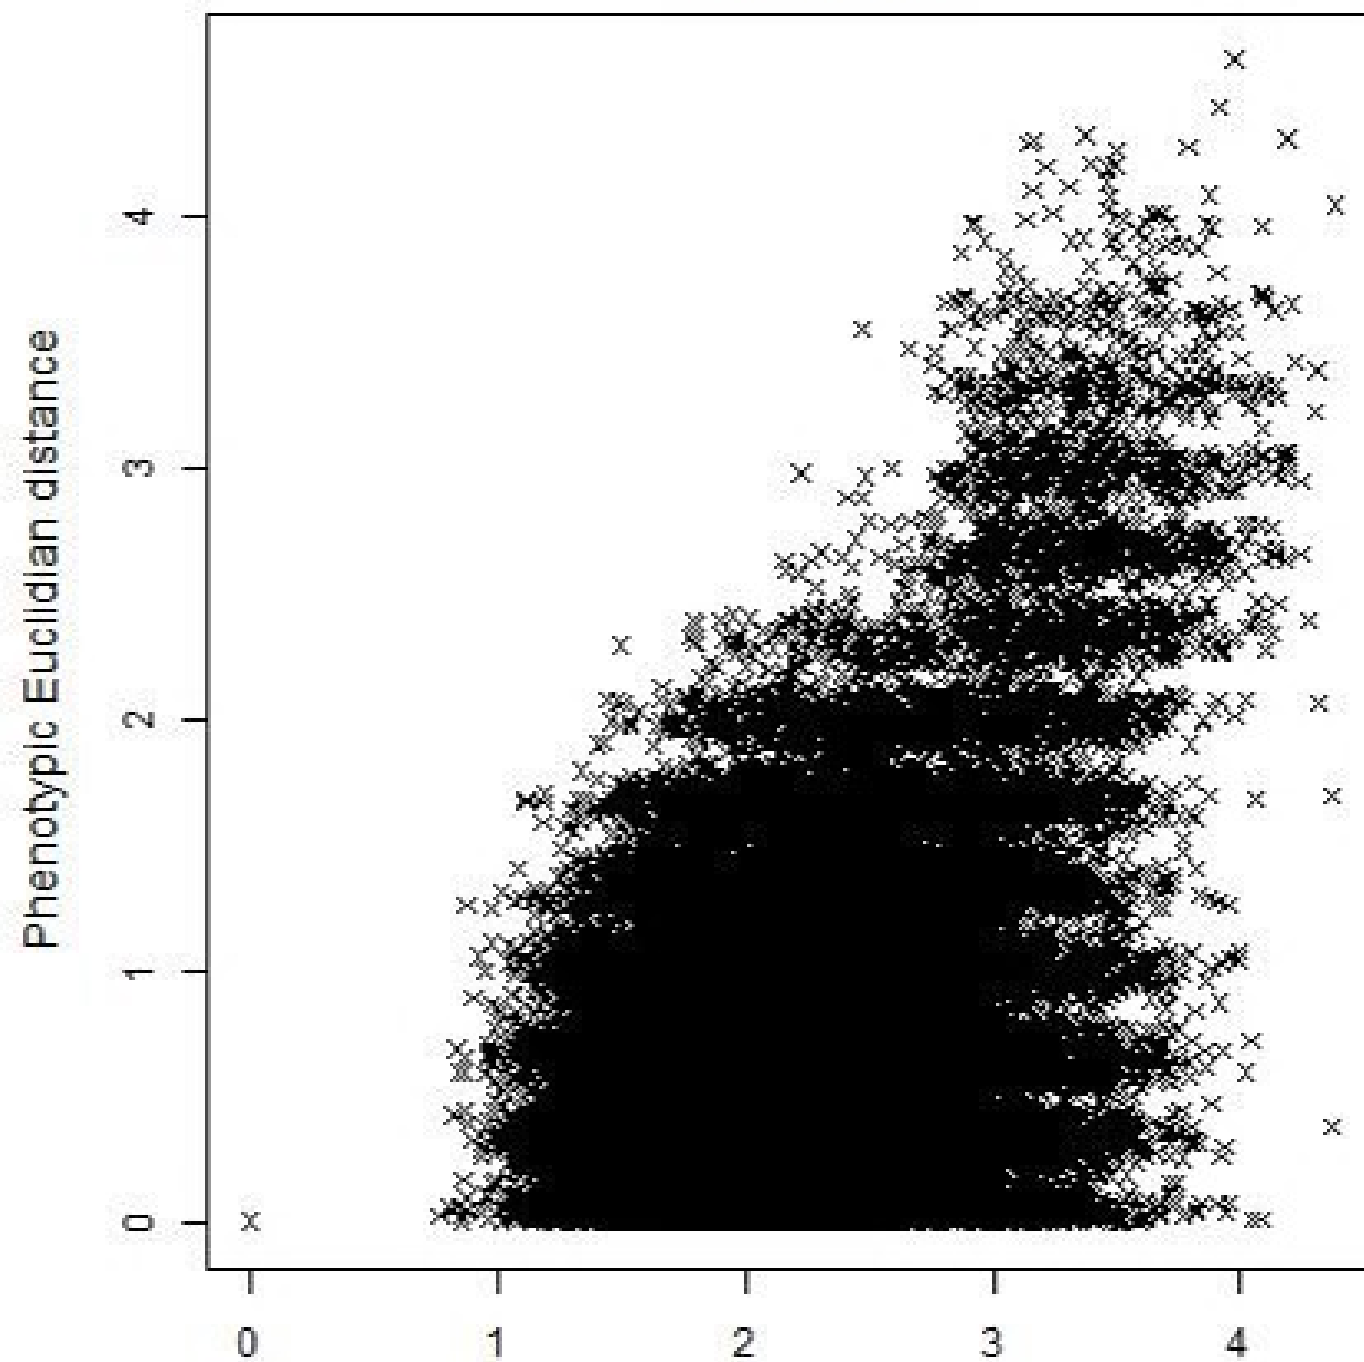

Genetic Euclidian distance (based on the 100 most significantly associated SNPs)



# SCD\_wi1617\_lu

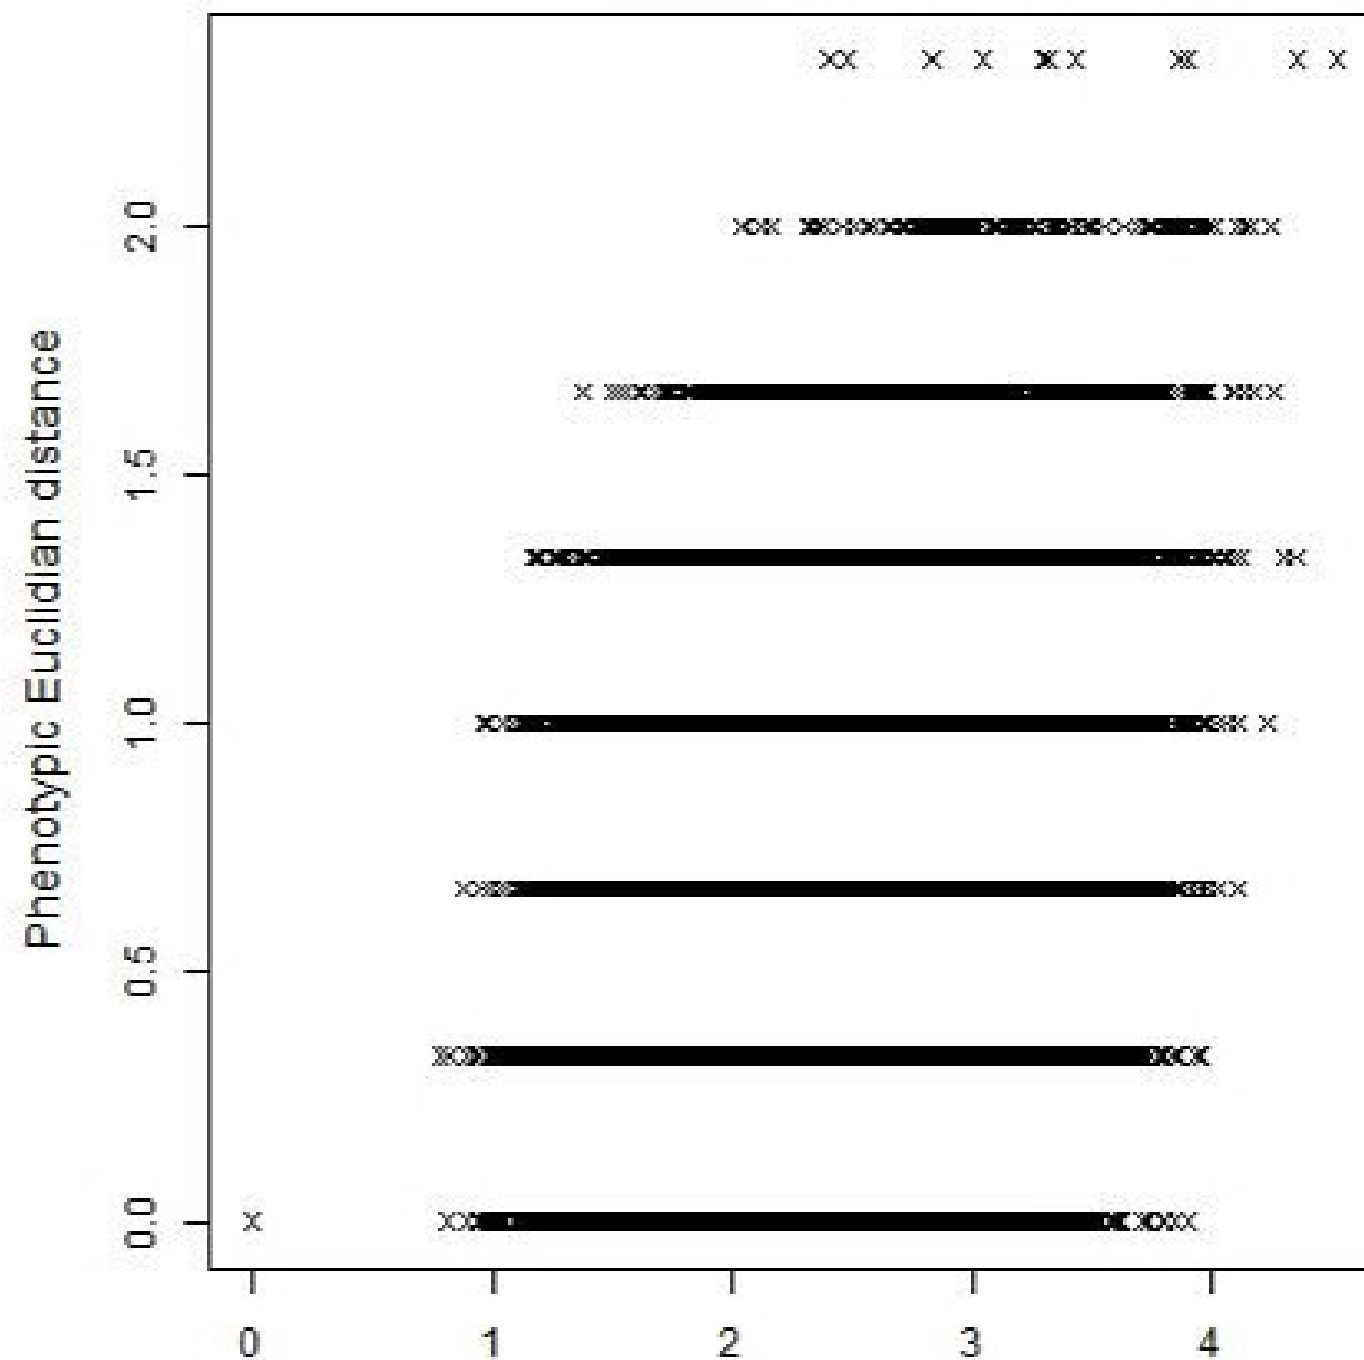

Genetic Euclidian distance (based on the 100 most significantly associated SNPs)

# SCD\_wi1617\_me

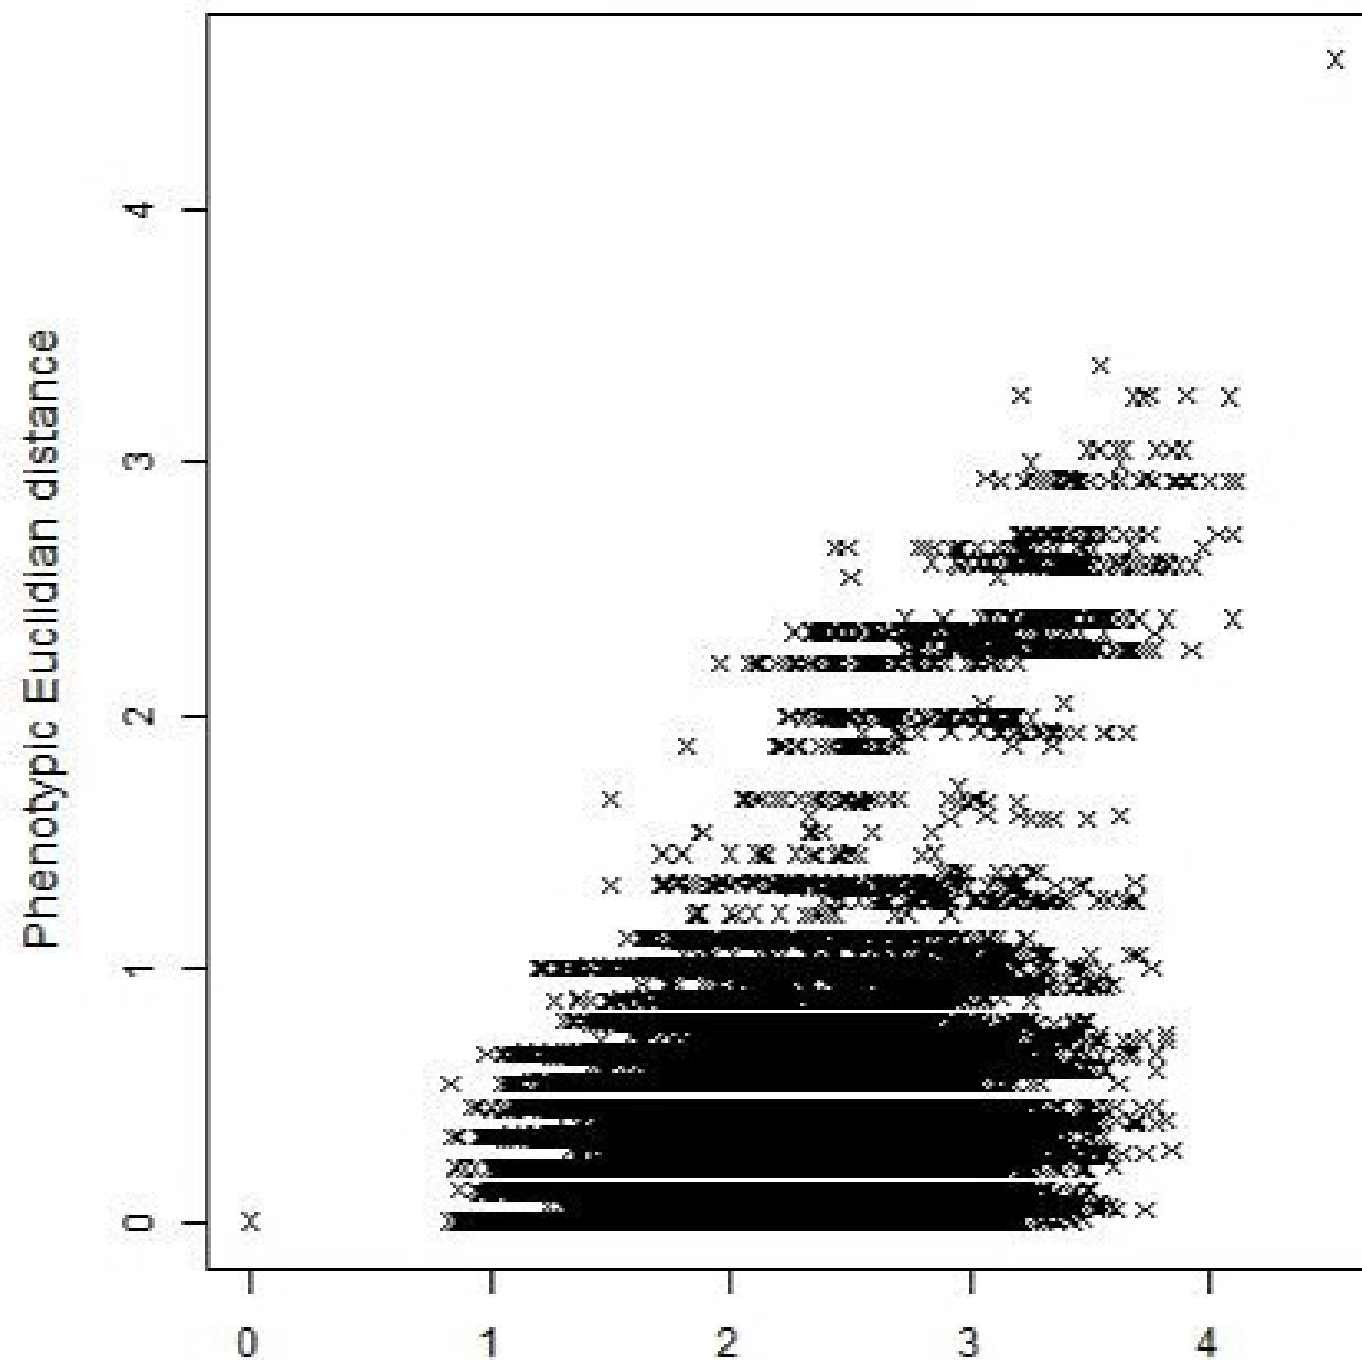

Genetic Euclidian distance (based on the 100 most significantly associated SNPs)

SCD\_wi1617\_po

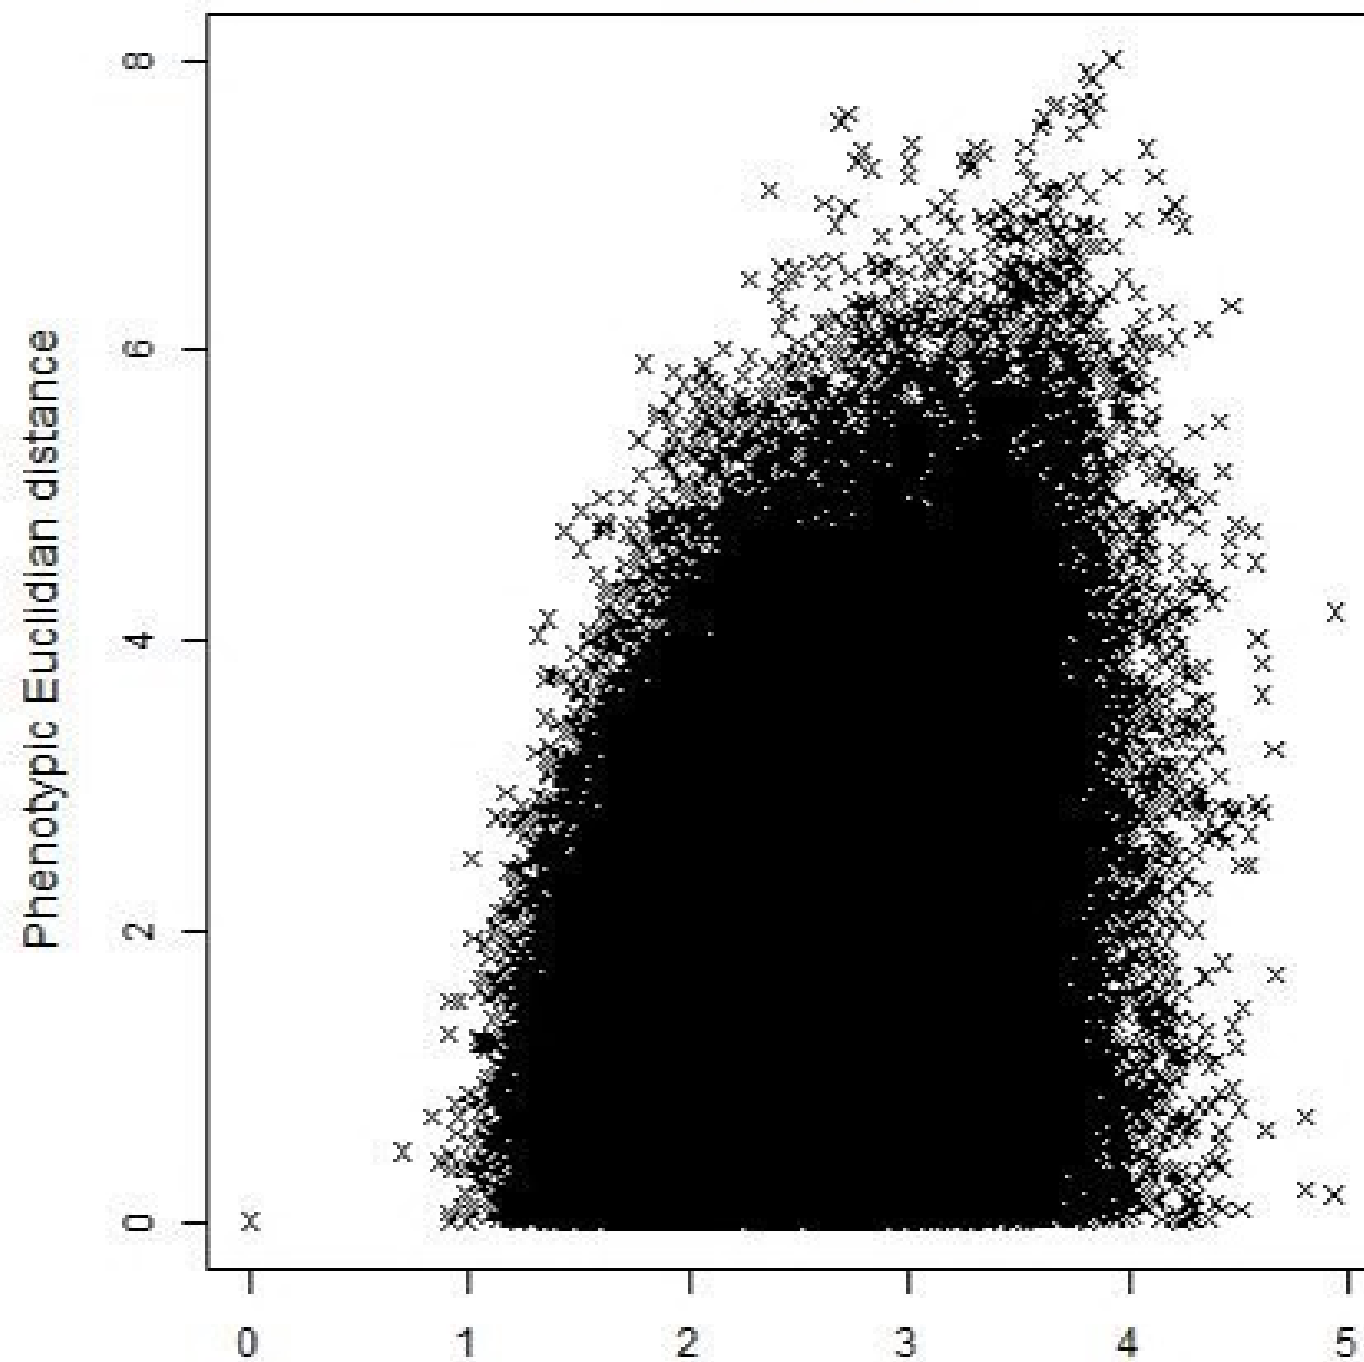

Genetic Euclidian distance (based on the 100 most significantly associated SNPs)

# SCD\_wi1718\_lu

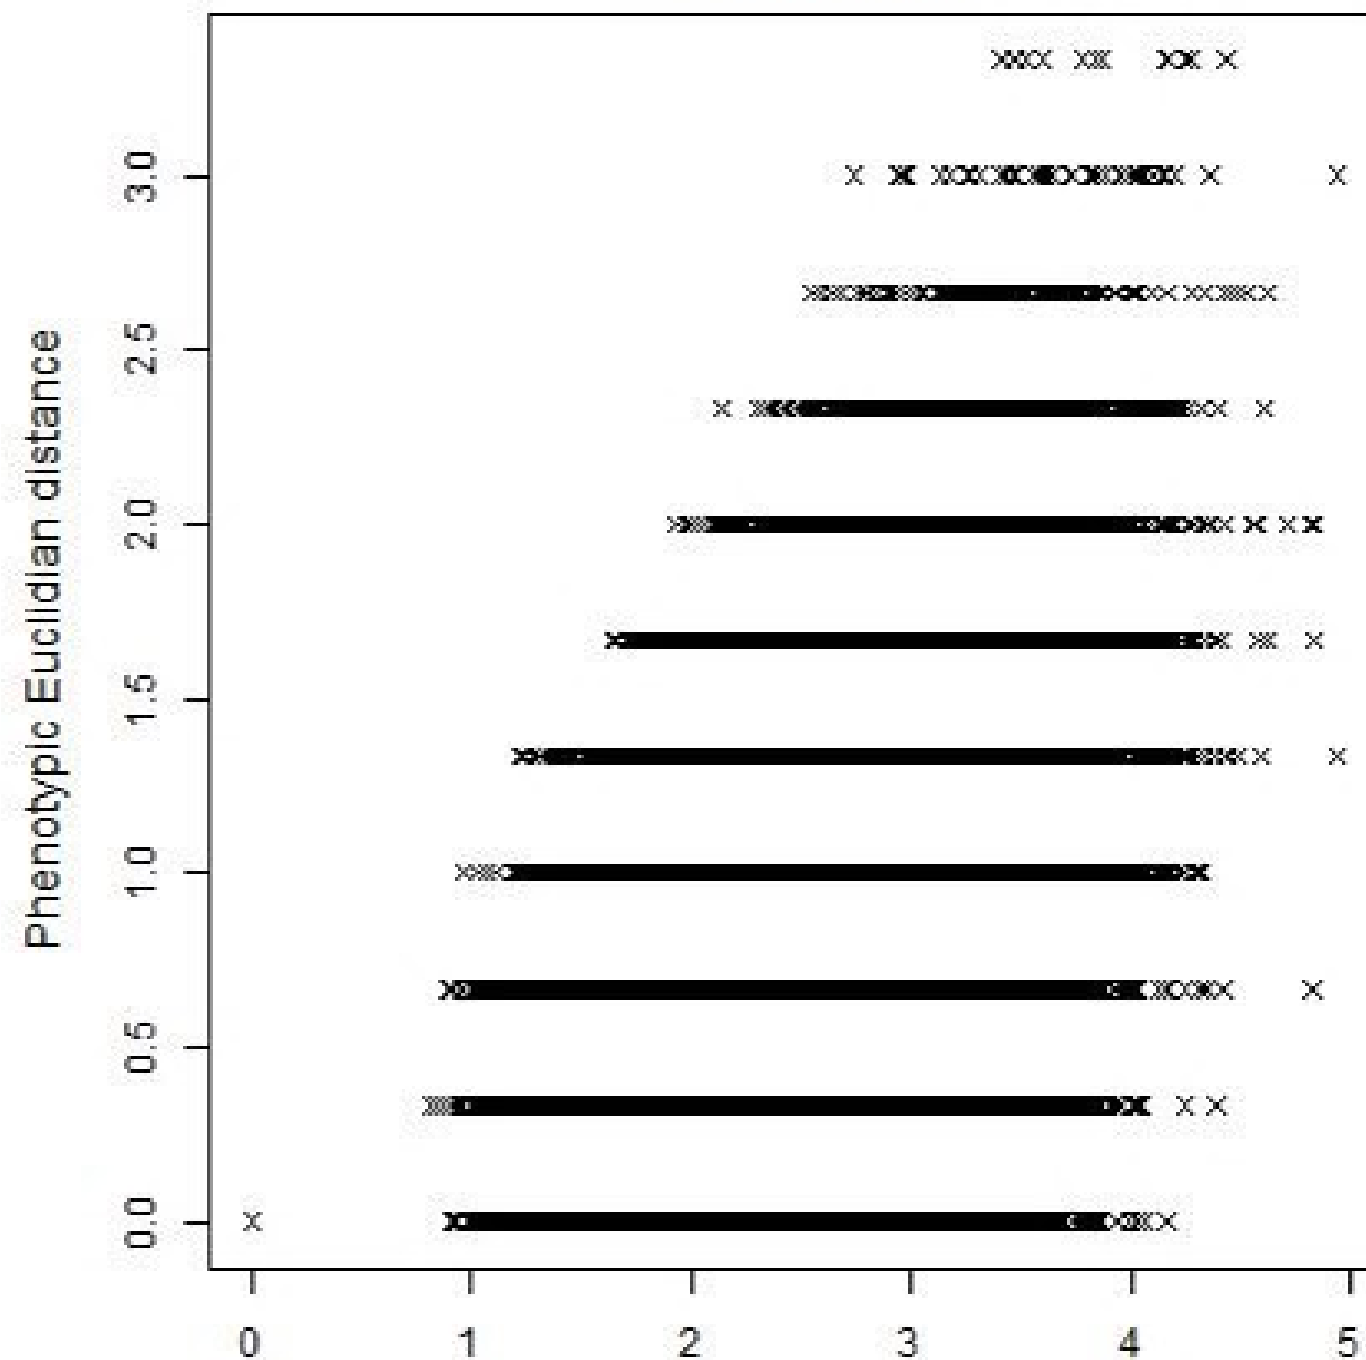

Genetic Euclidian distance (based on the 100 most significantly associated SNPs)

# SGR\_lu16

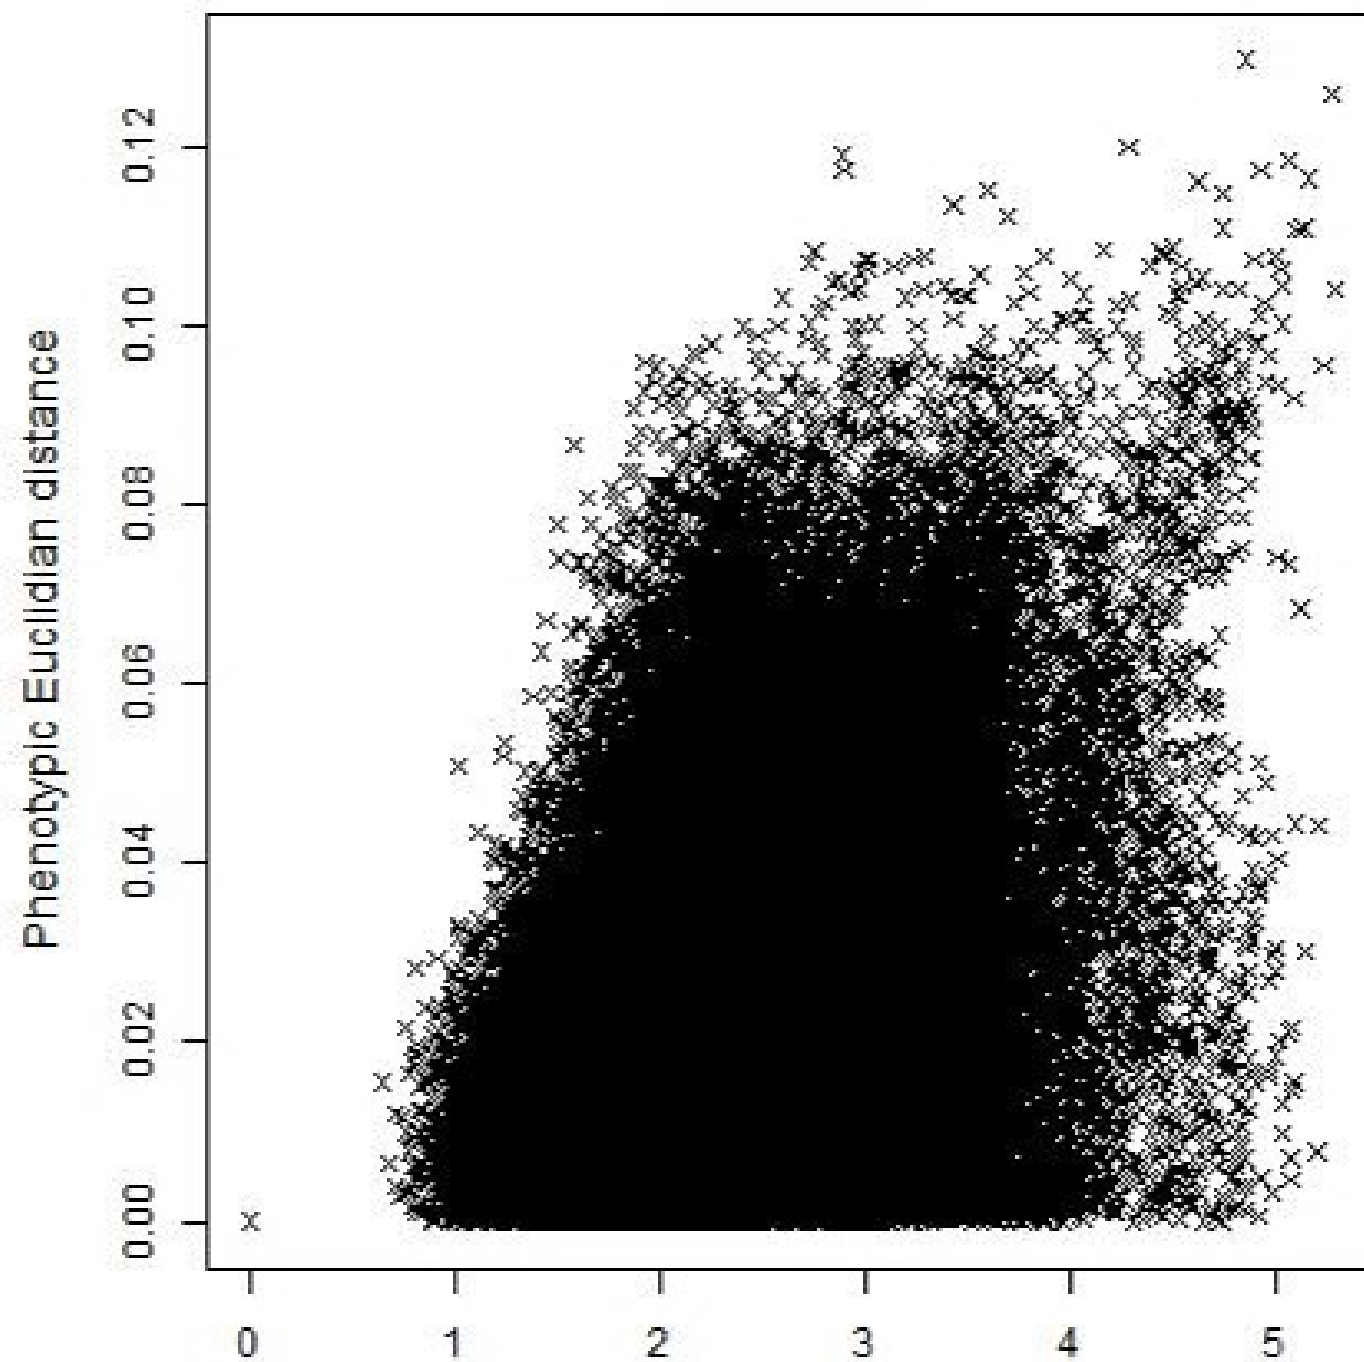

Genetic Euclidian distance (based on the 100 most significantly associated SNPs)

# SGR\_me16

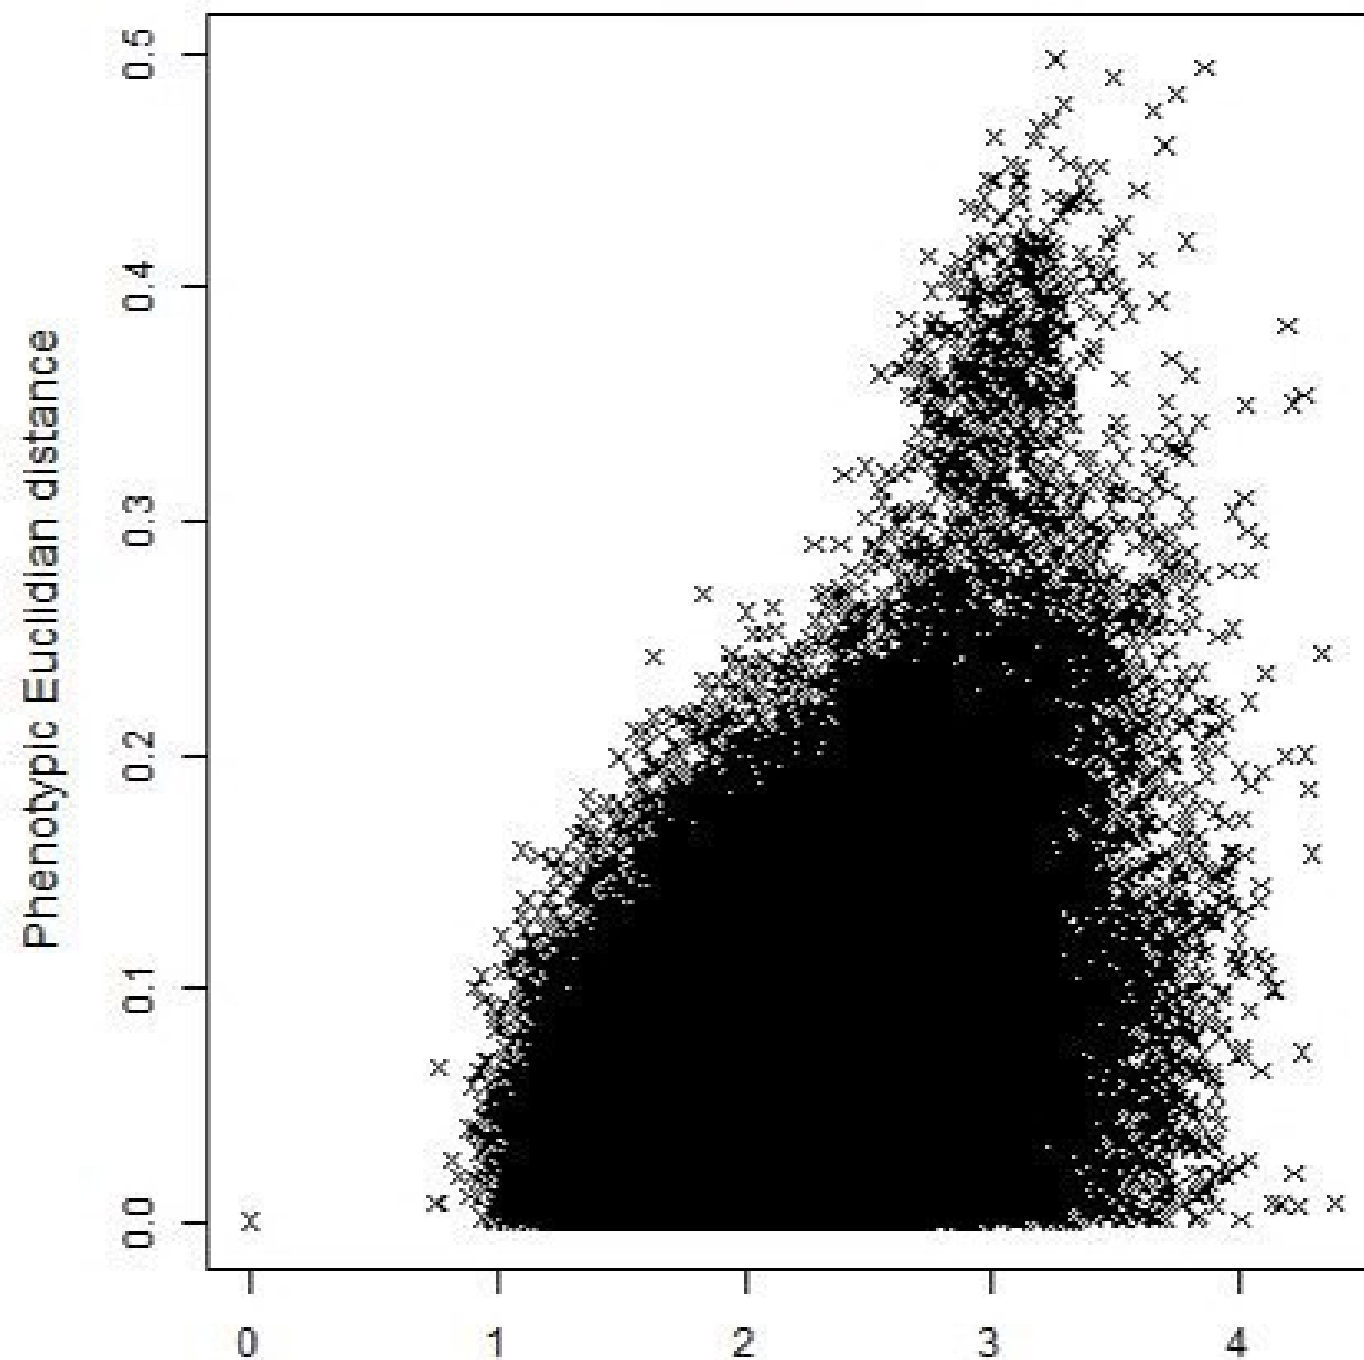

Genetic Euclidian distance (based on the 100 most significantly associated SNPs)

# SGR\_me17

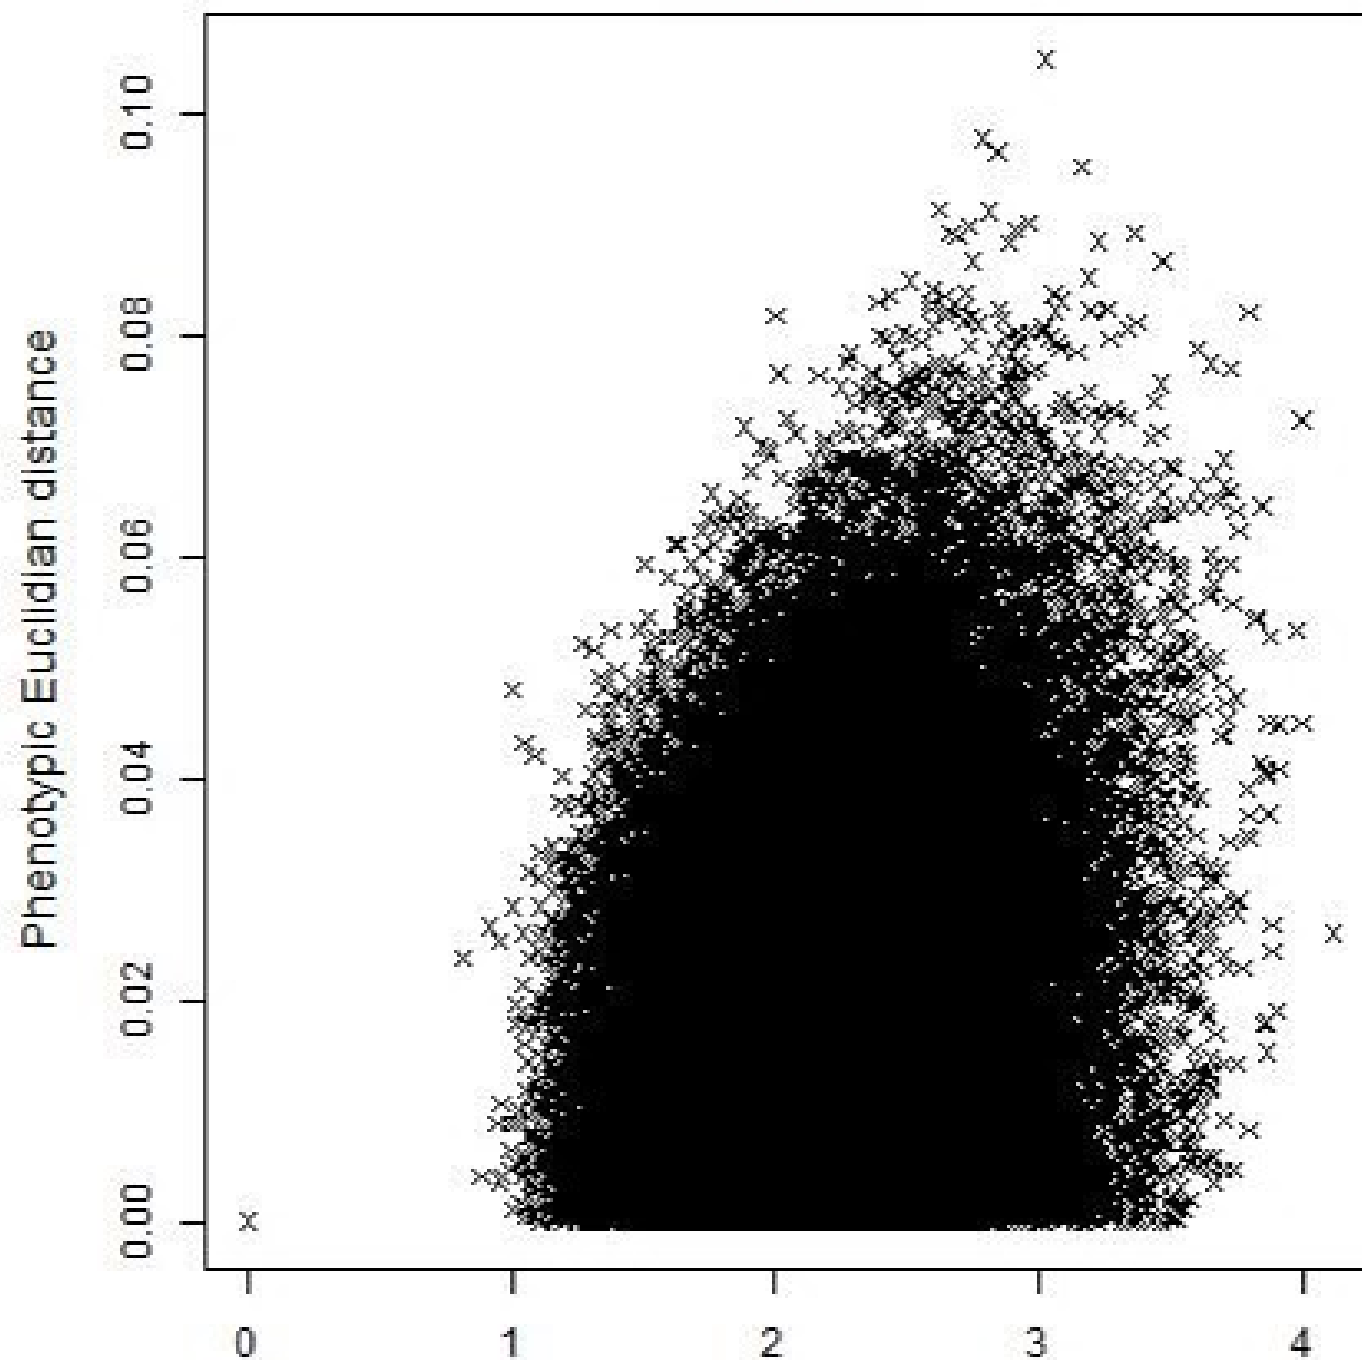

Genetic Euclidian distance (based on the 100 most significantly associated SNPs)

SGR\_po17

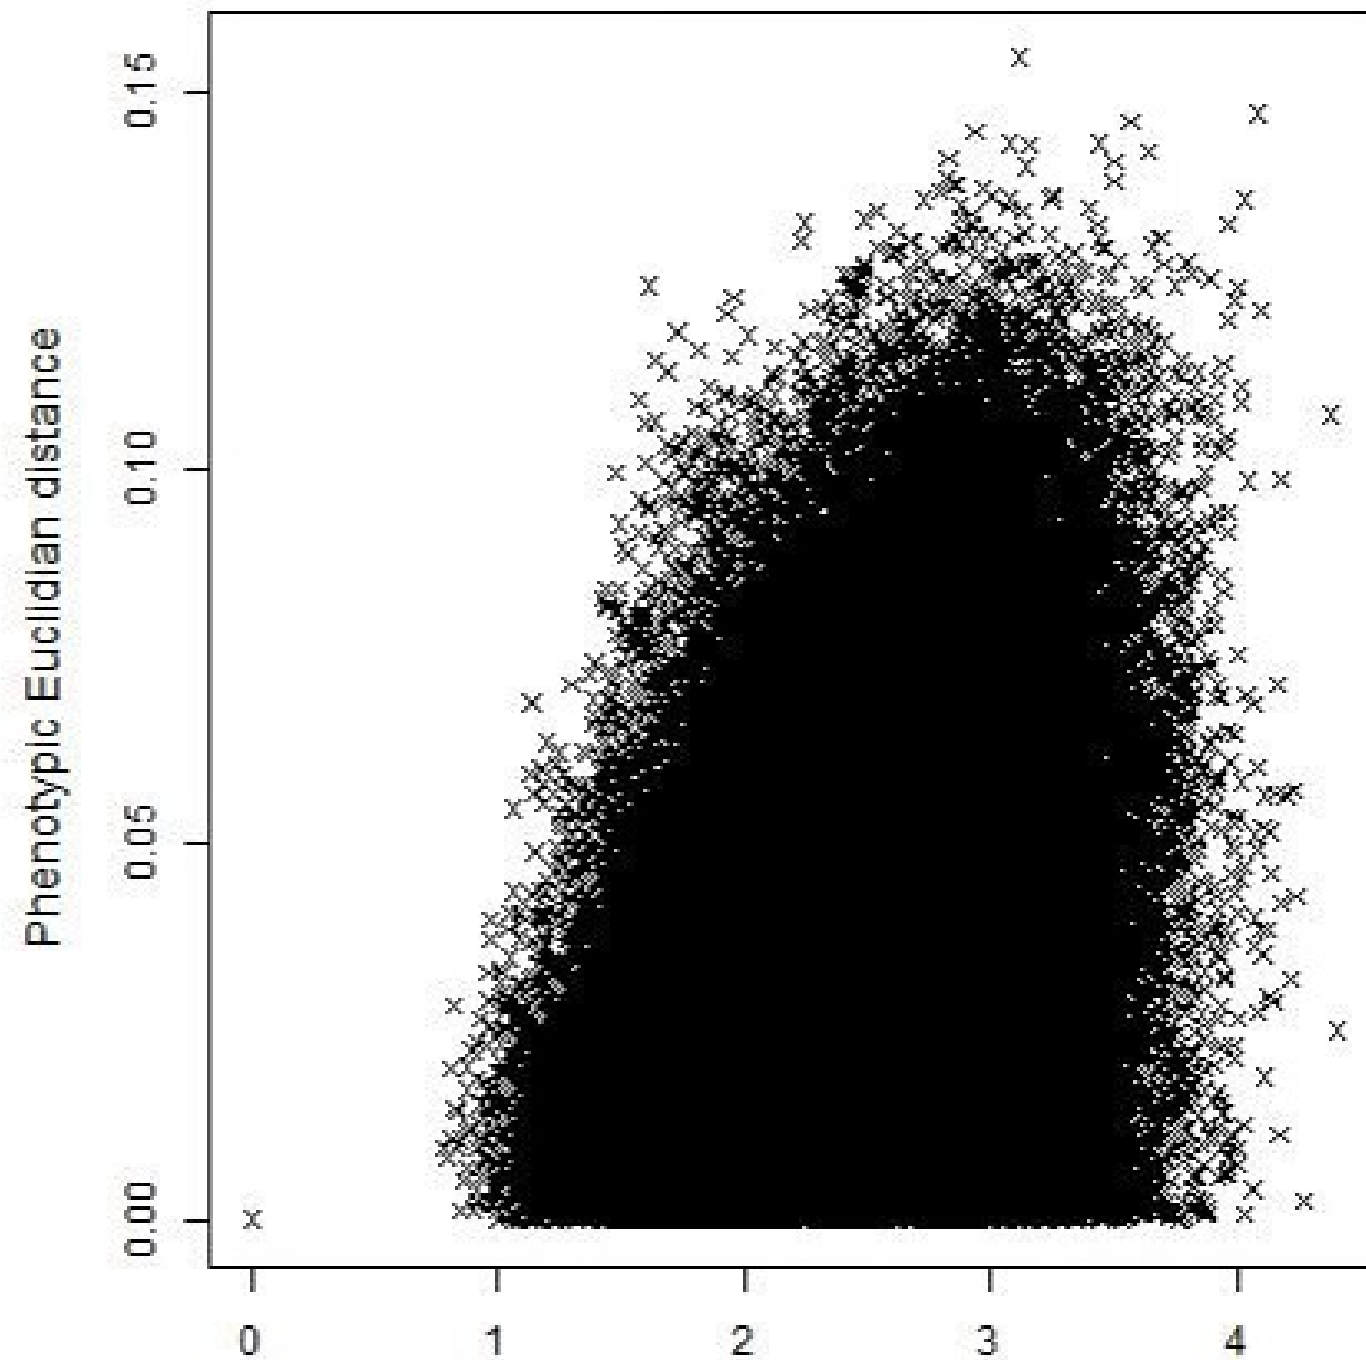

Genetic Euclidian distance (based on the 100 most significantly associated SNPs)



# SMH\_lu16

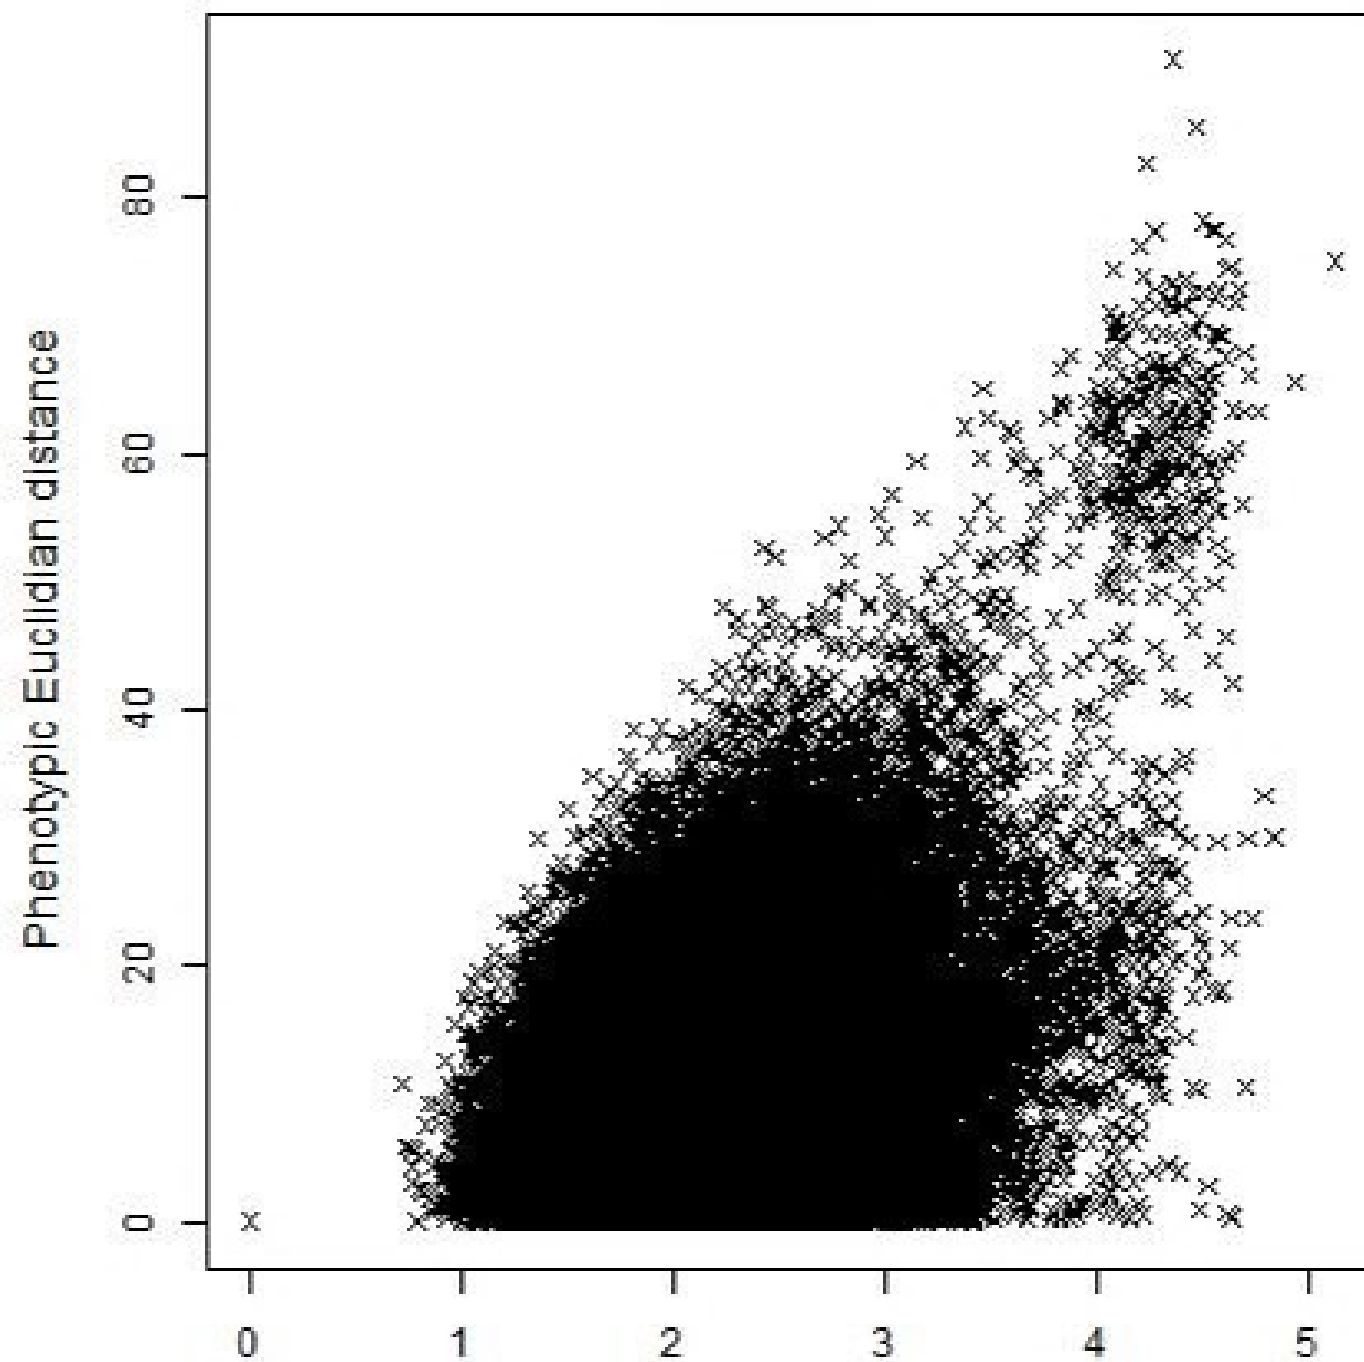

Genetic Euclidian distance (based on the 100 most significantly associated SNPs)

# SMH\_me16

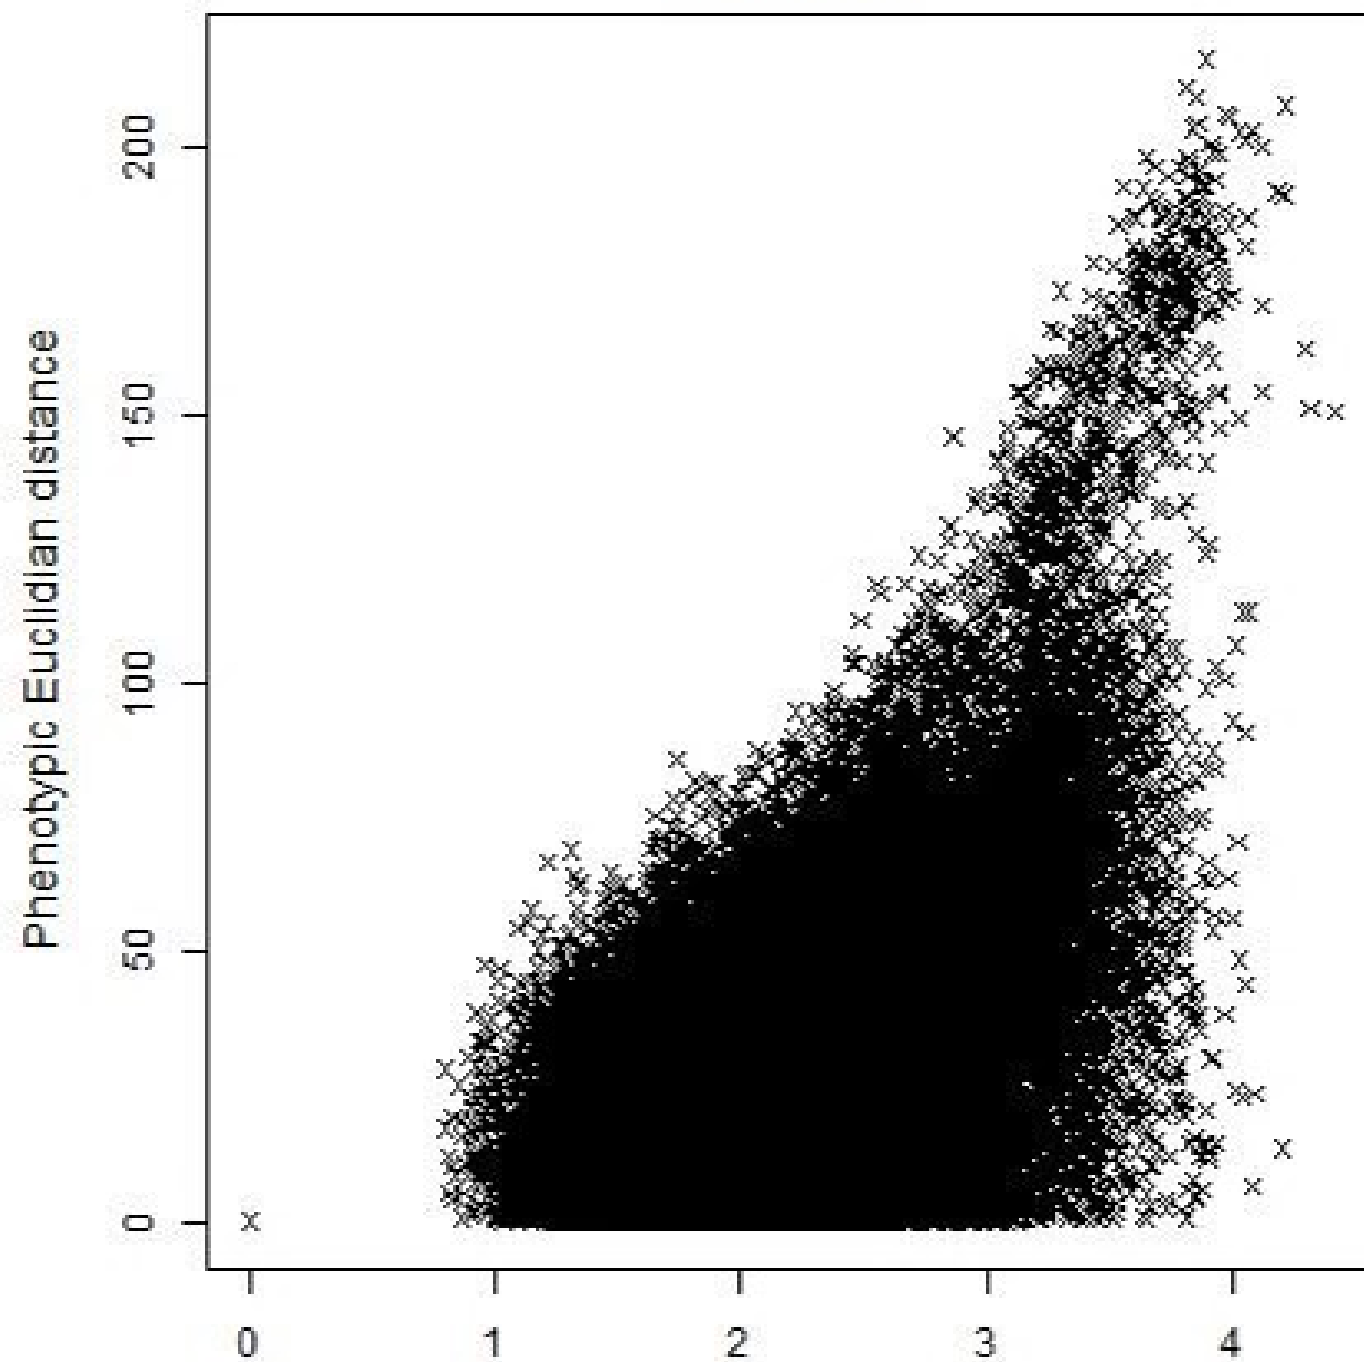

Genetic Euclidian distance (based on the 100 most significantly associated SNPs)

# SMH\_me17

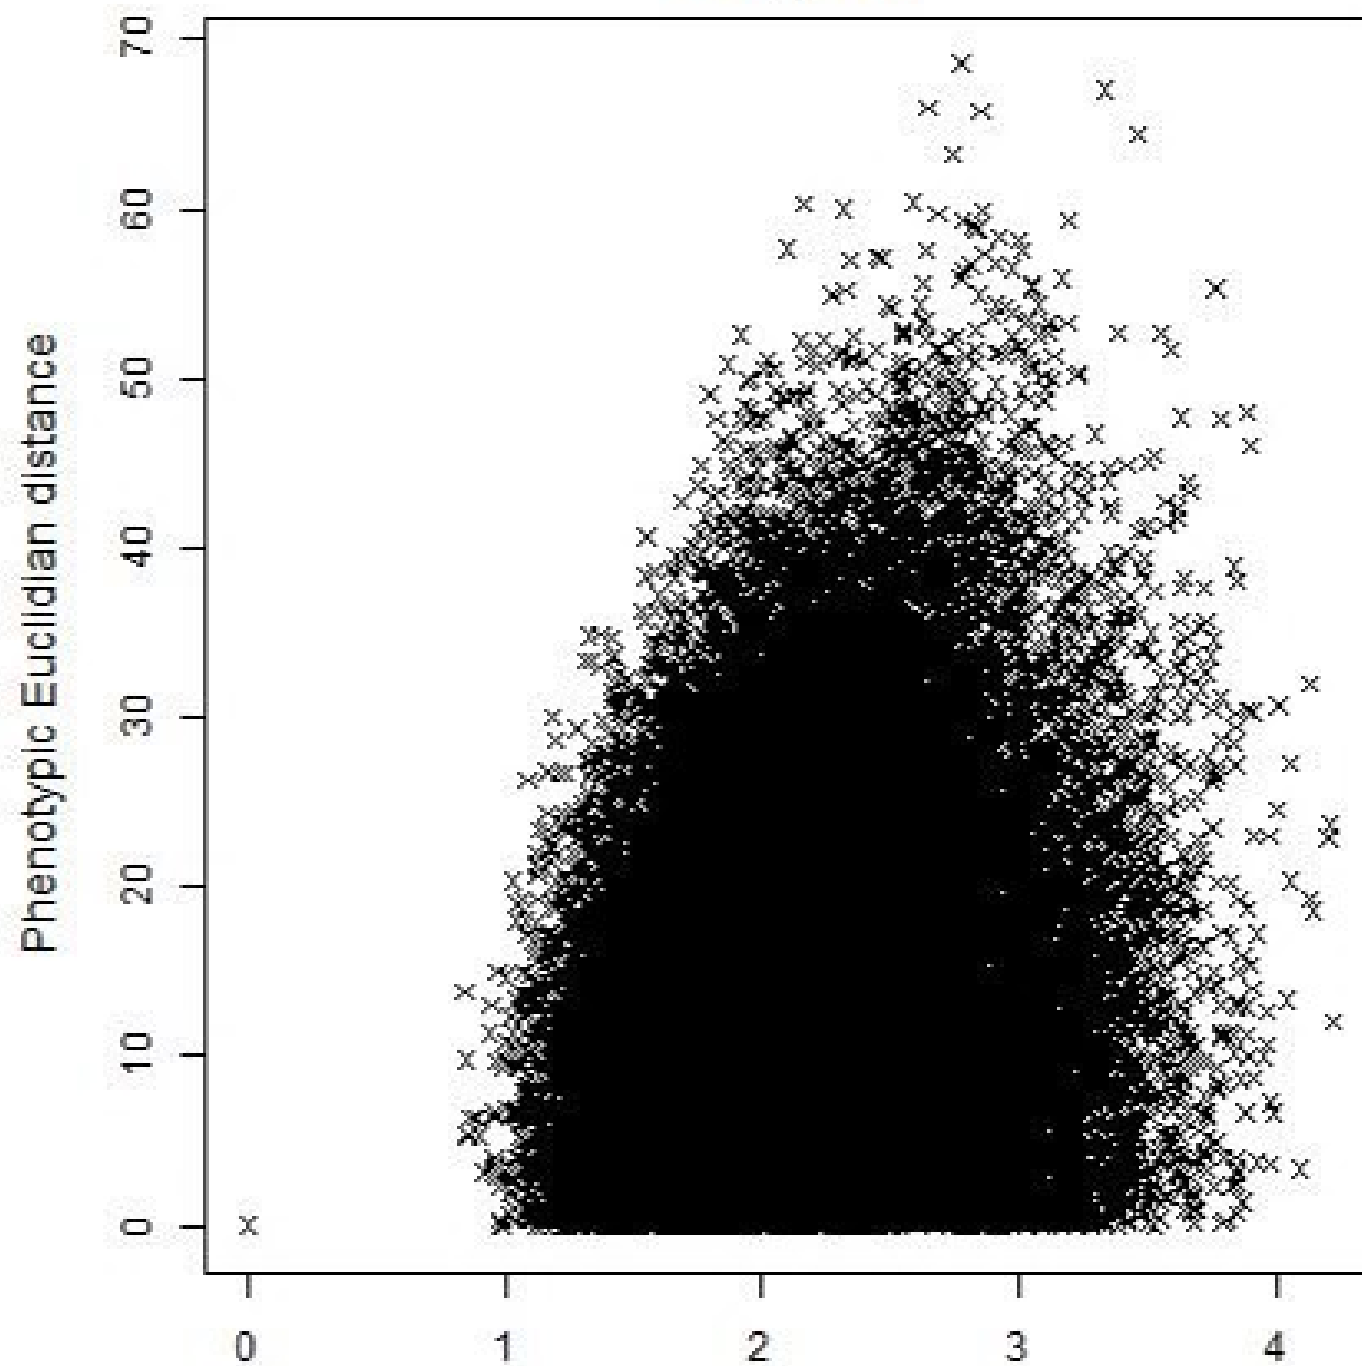

Genetic Euclidian distance (based on the 100 most significantly associated SNPs)

SMH\_po17

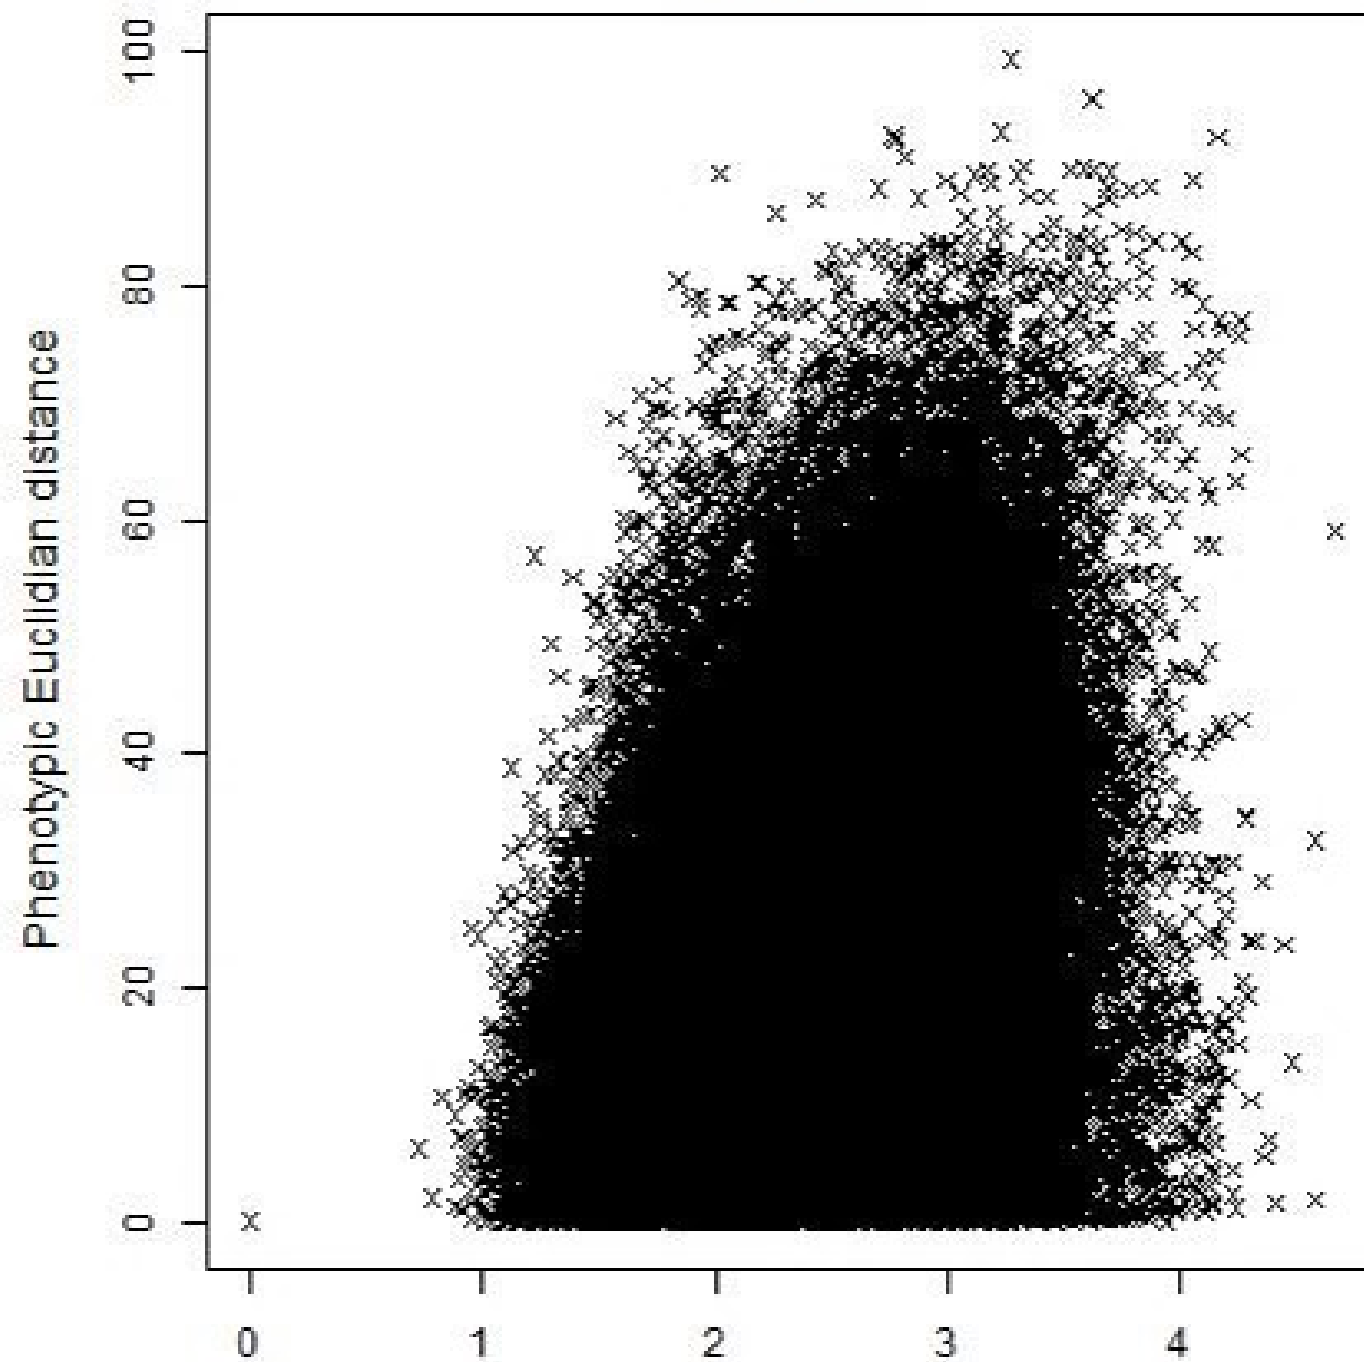

Genetic Euclidian distance (based on the 100 most significantly associated SNPs)

VAC\_avg

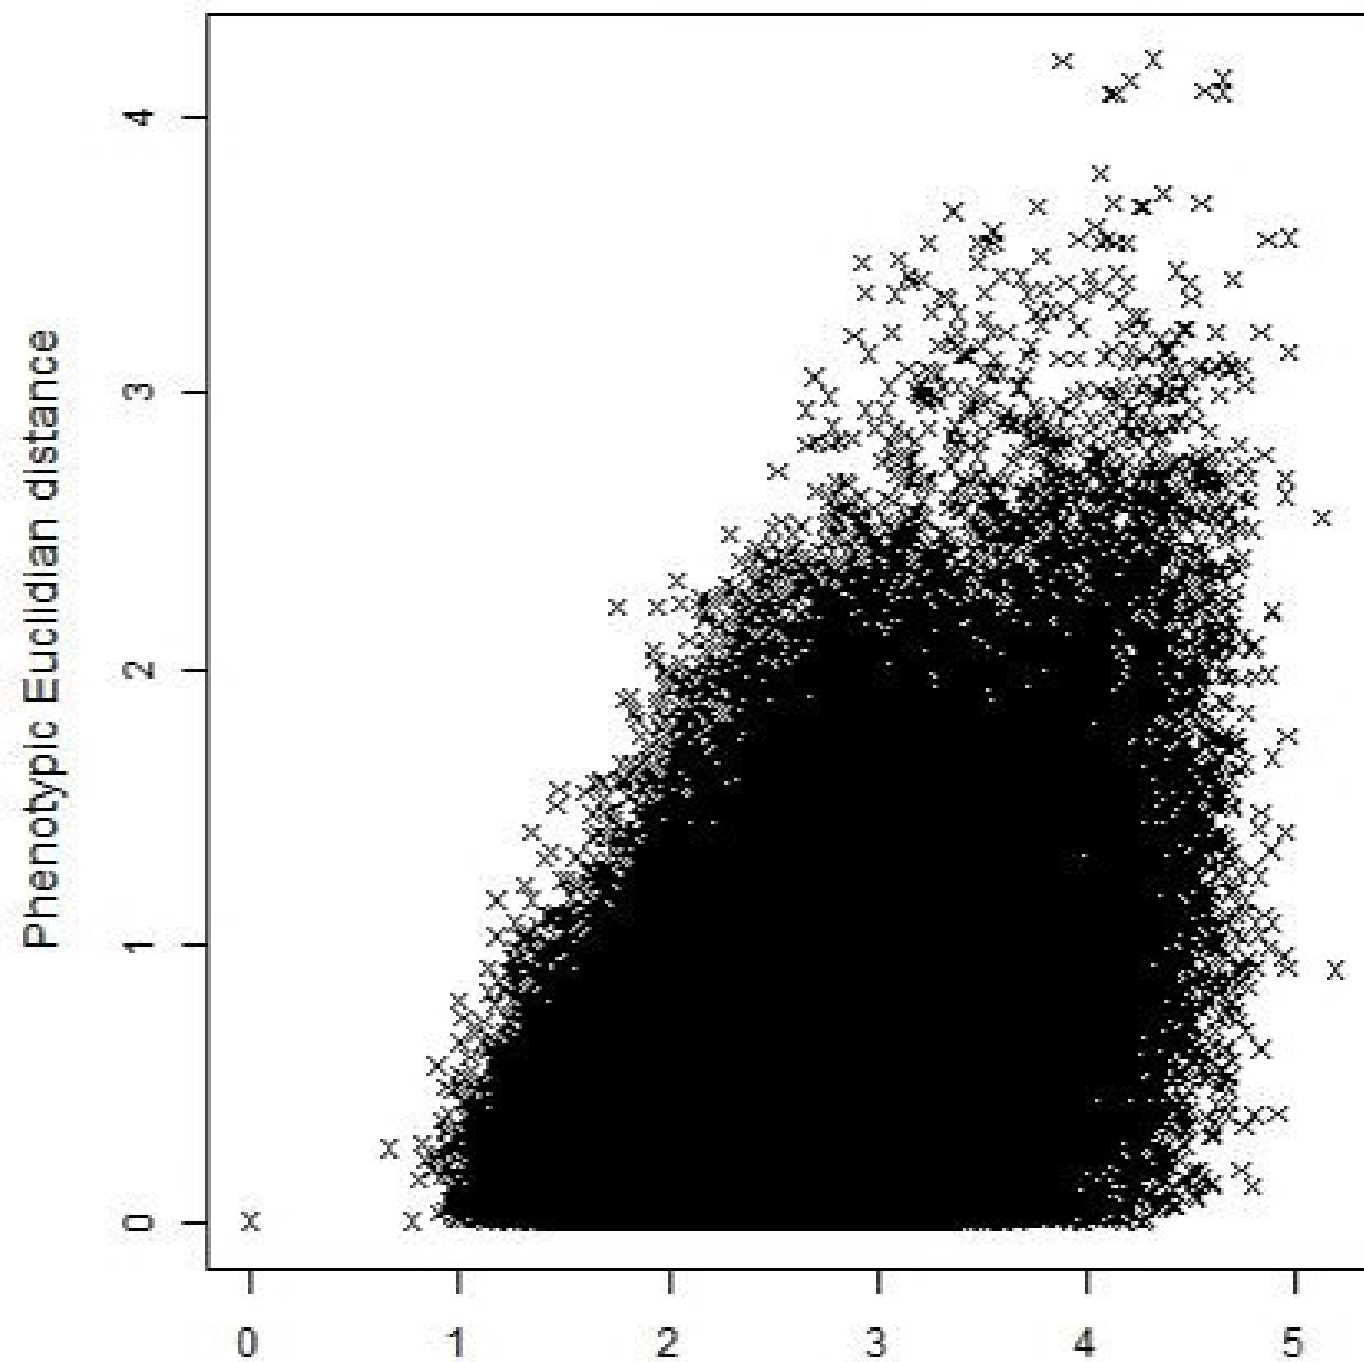

Genetic Euclidian distance (based on the 100 most significantly associated SNPs)

# VAC\_lu16

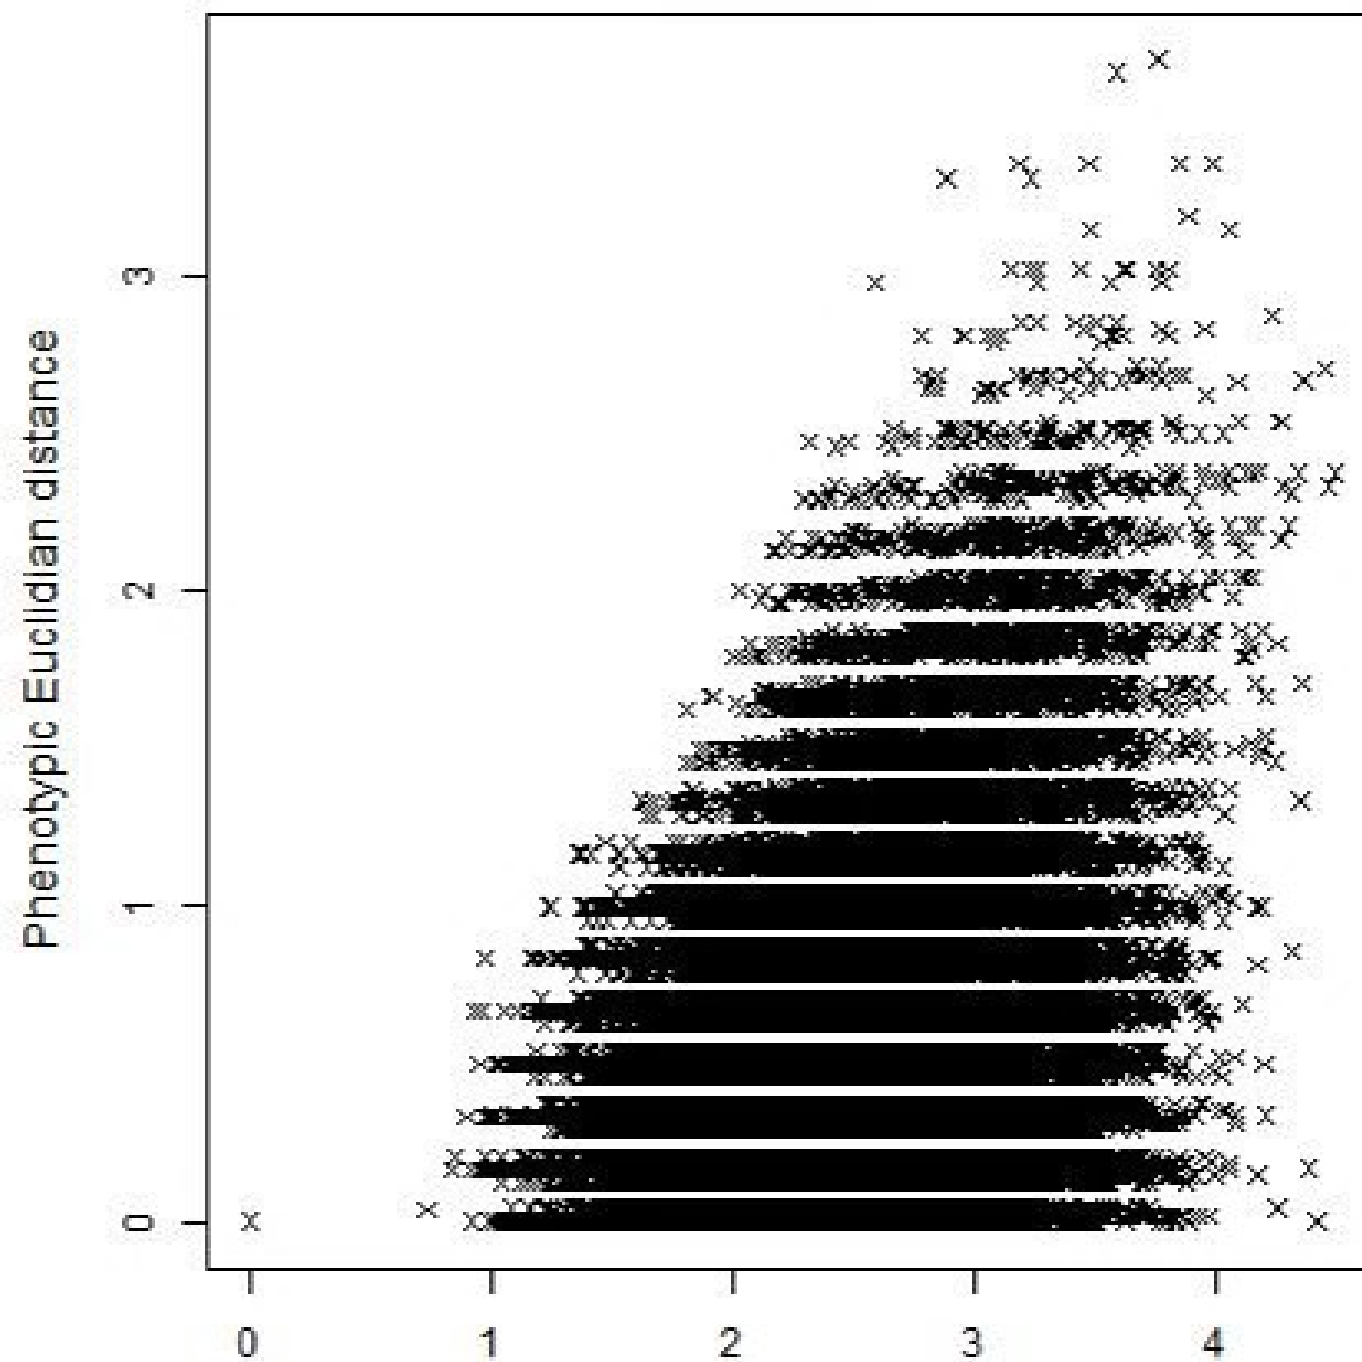

Genetic Euclidian distance (based on the 100 most significantly associated SNPs)

# VAC\_lu17

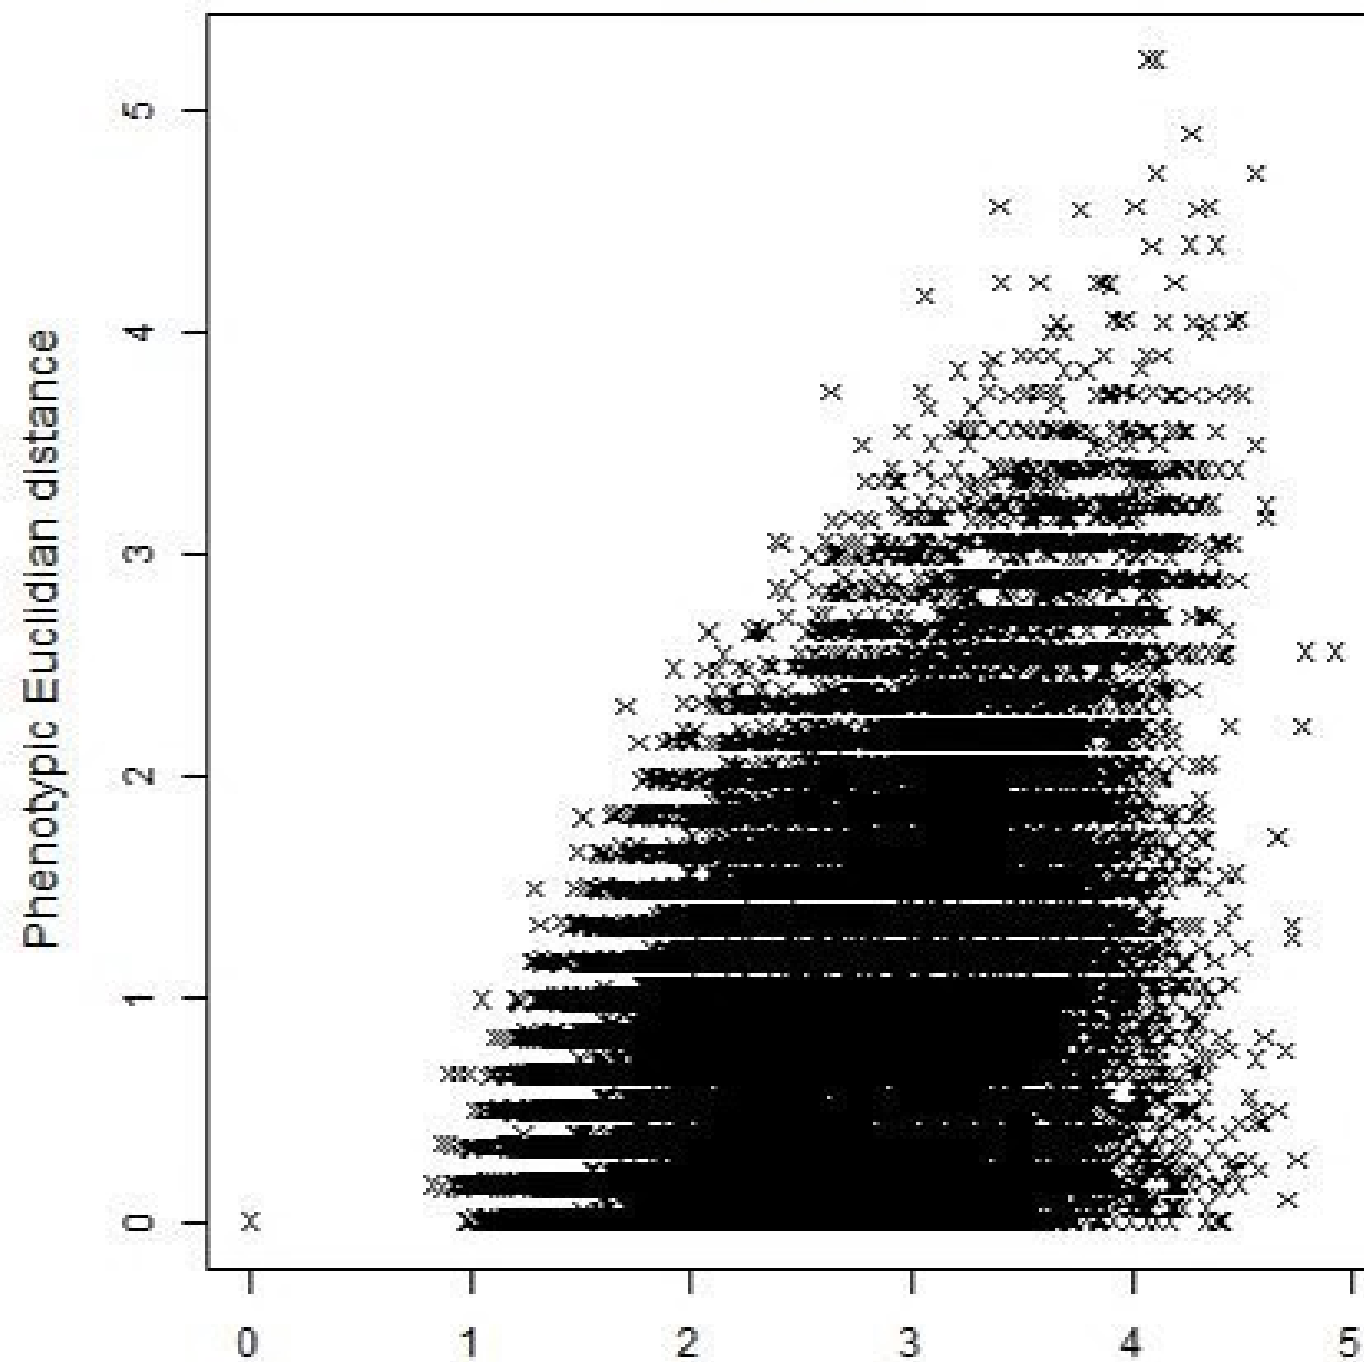

Genetic Euclidian distance (based on the 100 most significantly associated SNPs)

# VAC\_po17

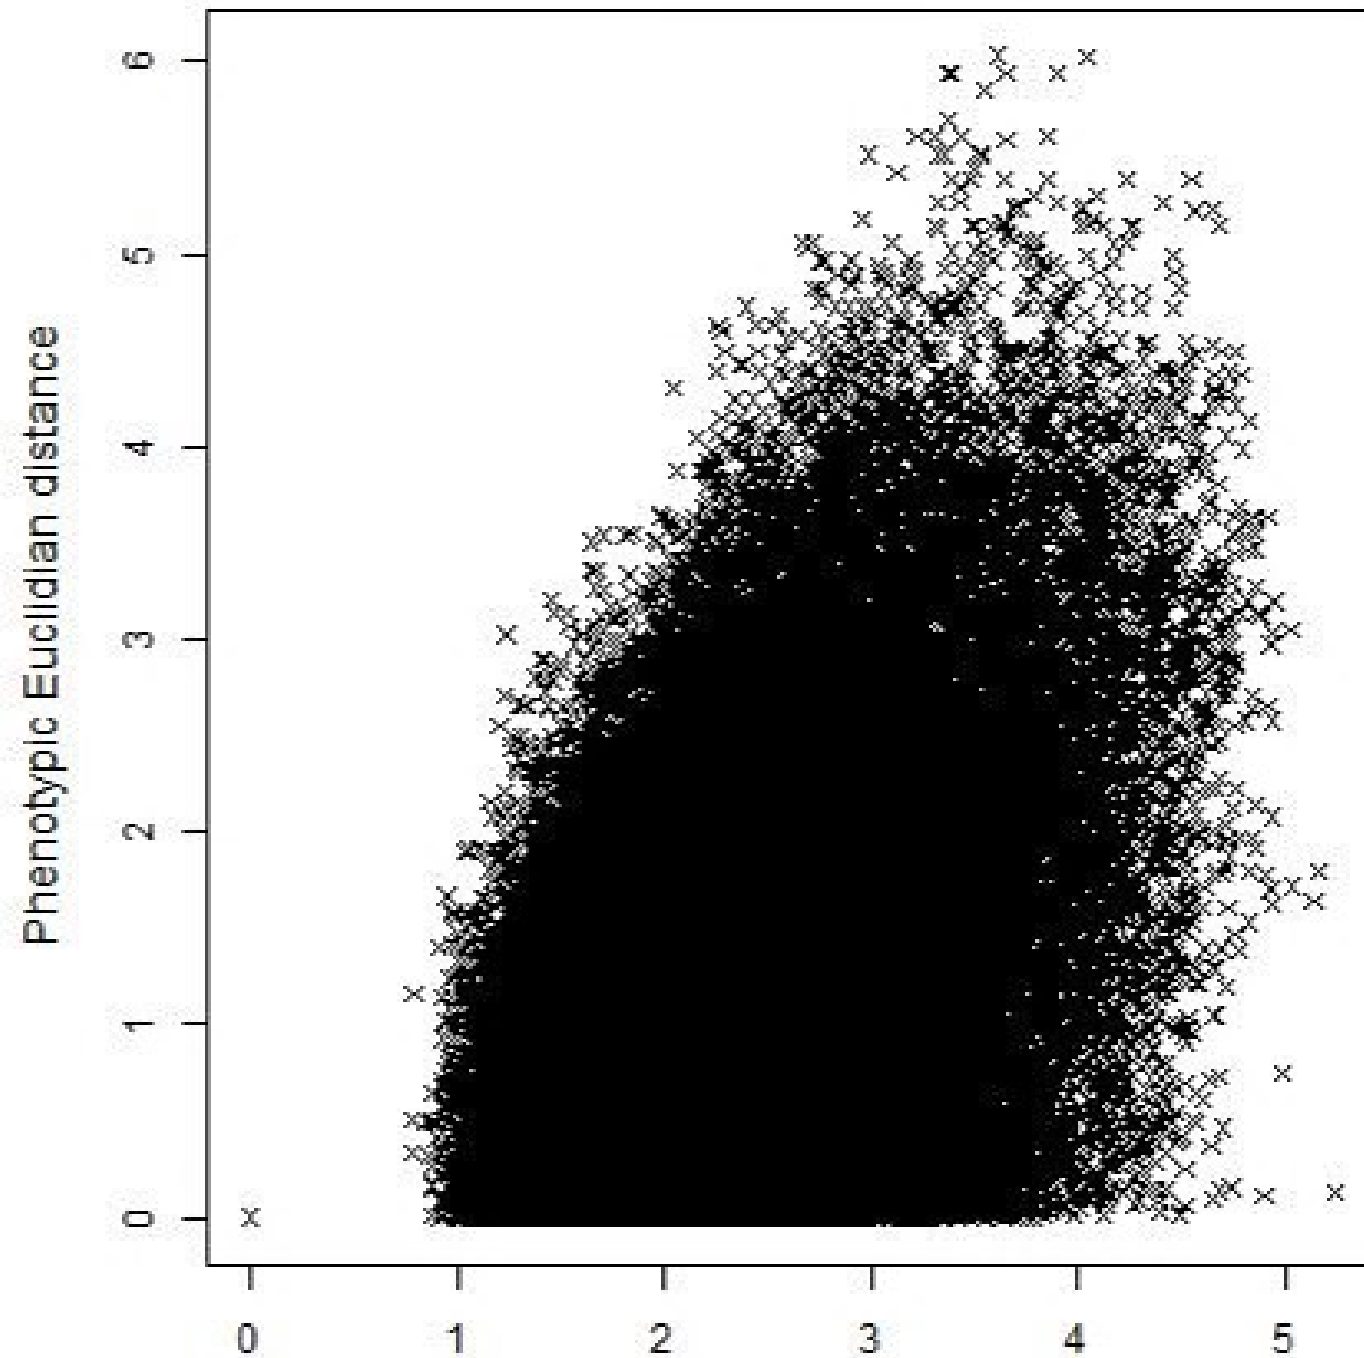

Genetic Euclidian distance (based on the 100 most significantly associated SNPs)



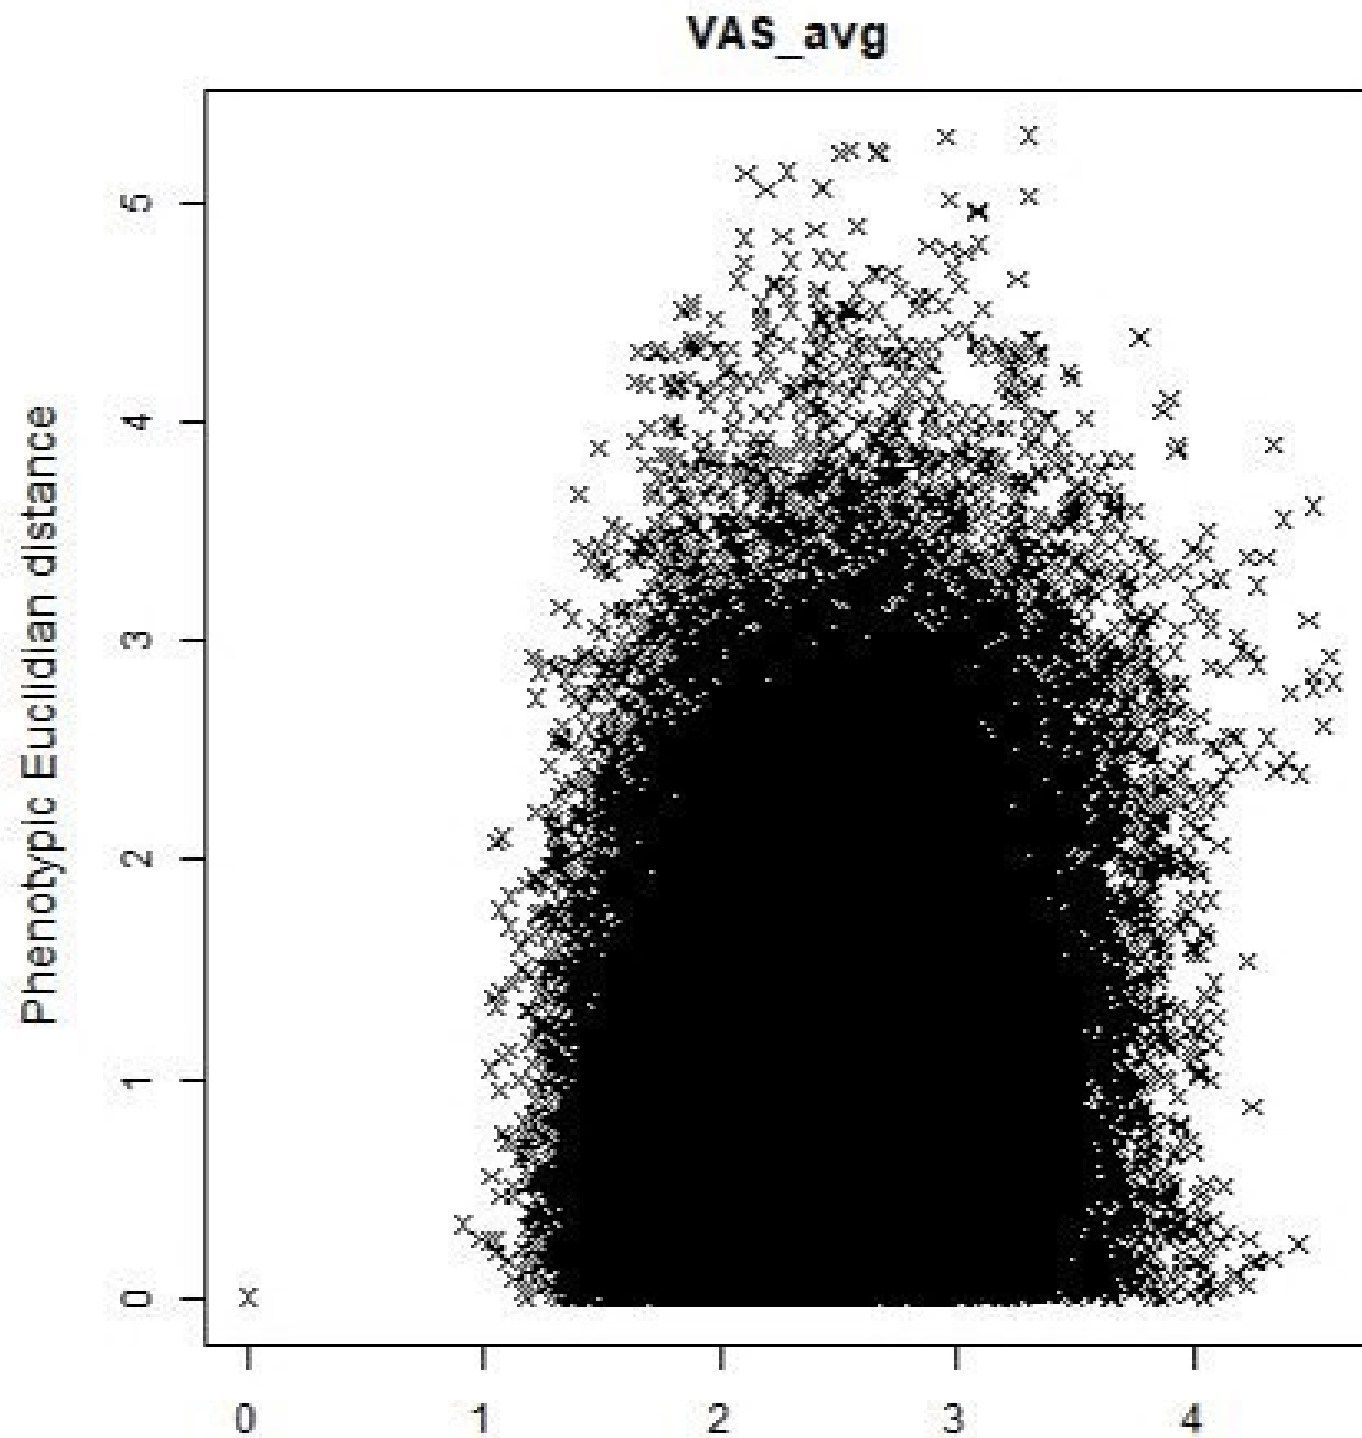

Genetic Euclidian distance (based on the 100 most significantly associated SNPs)

# VAS\_lu15

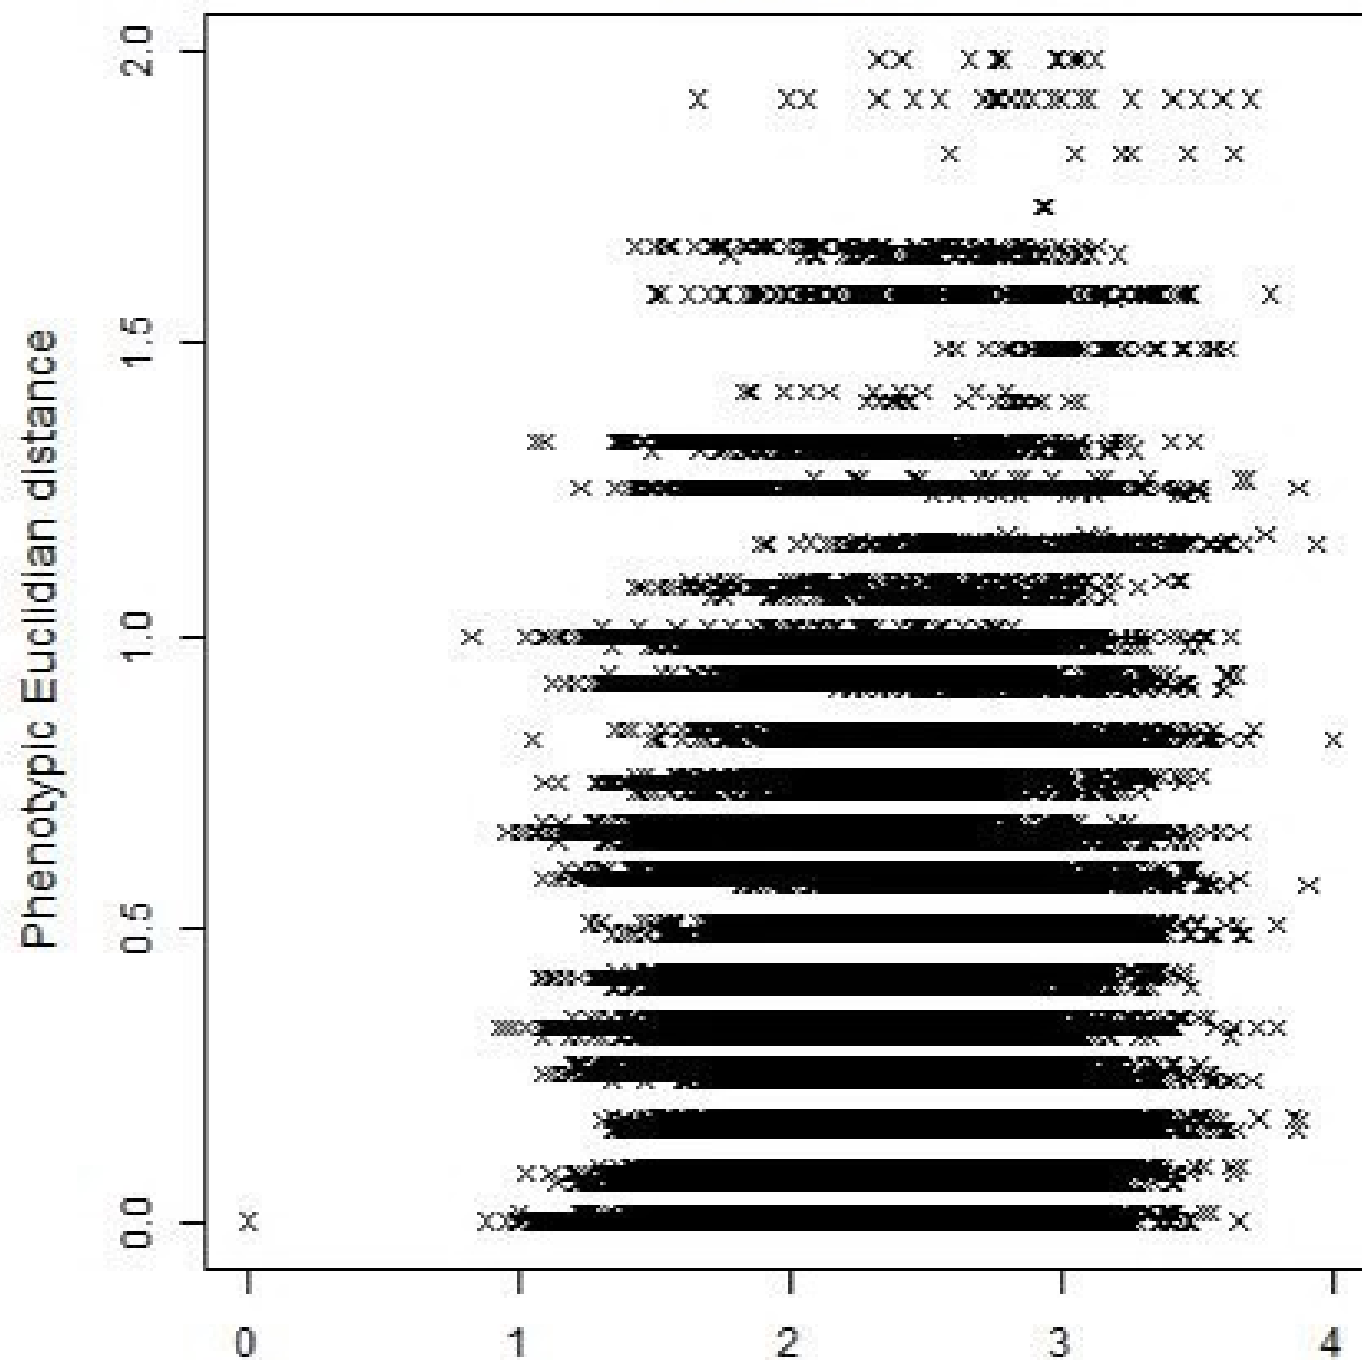

Genetic Euclidian distance (based on the 100 most significantly associated SNPs)

# VAS\_me15

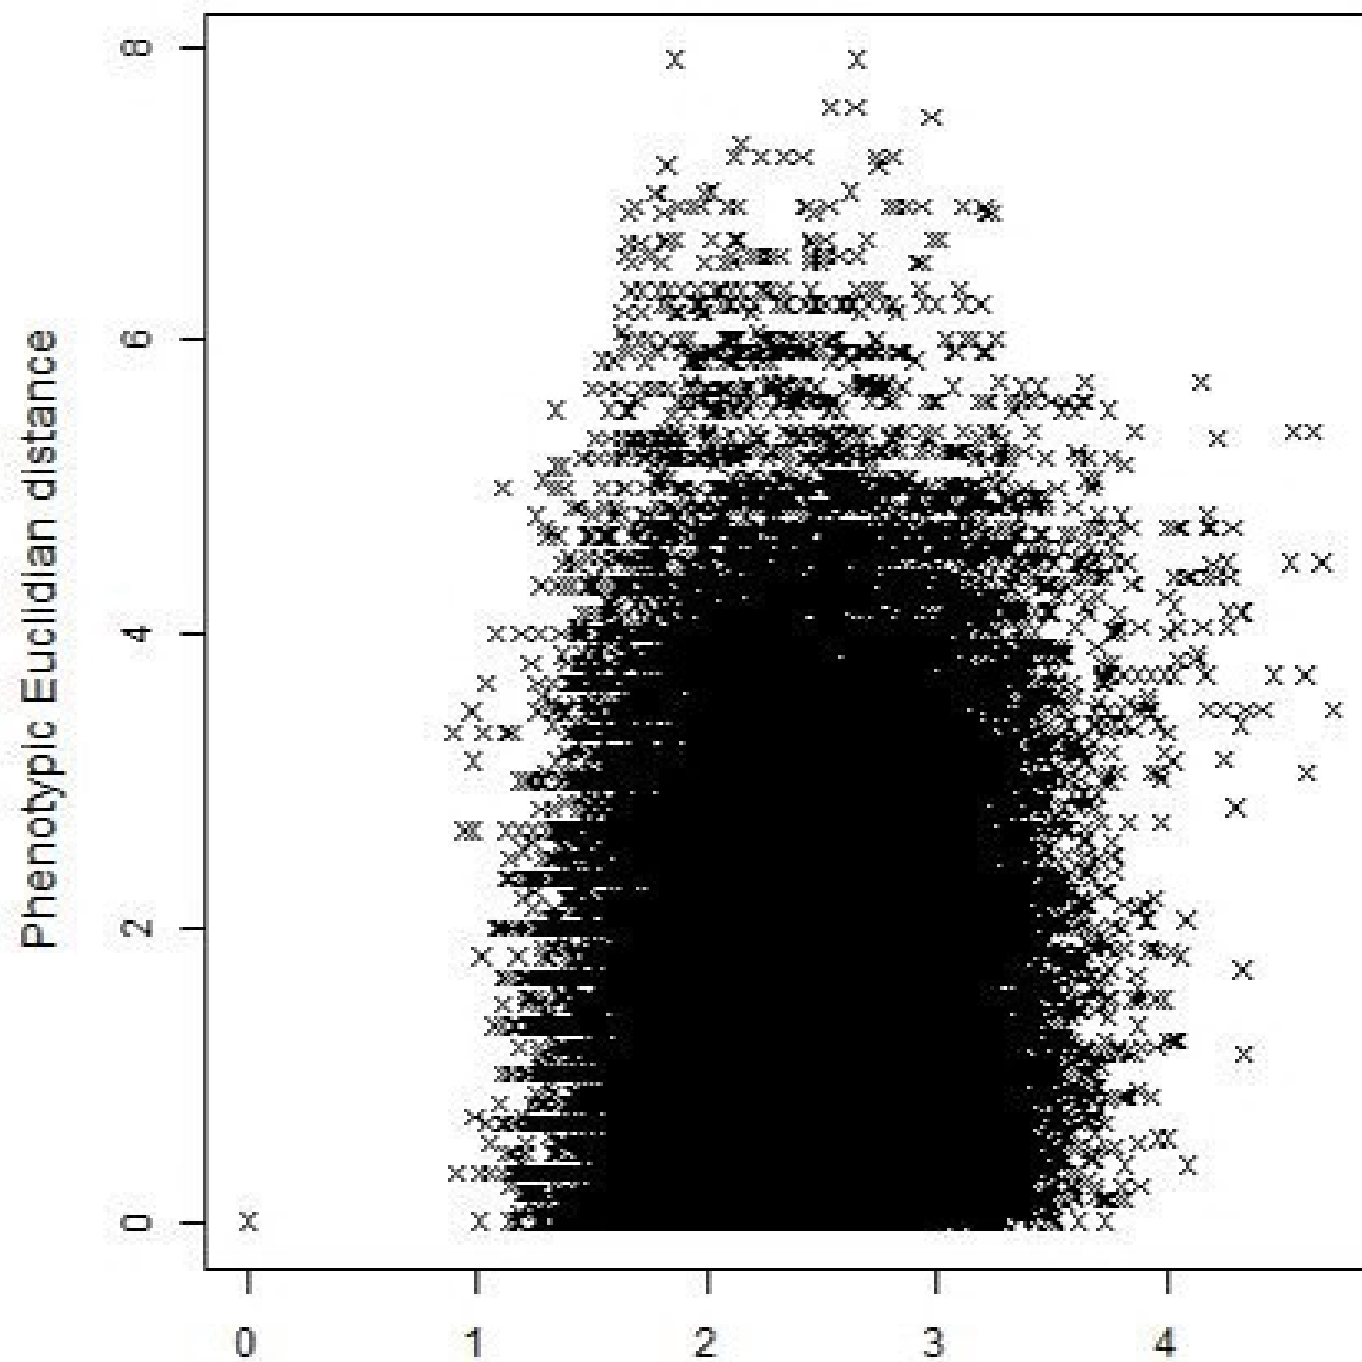

Genetic Euclidian distance (based on the 100 most significantly associated SNPs)

# VAS\_po15

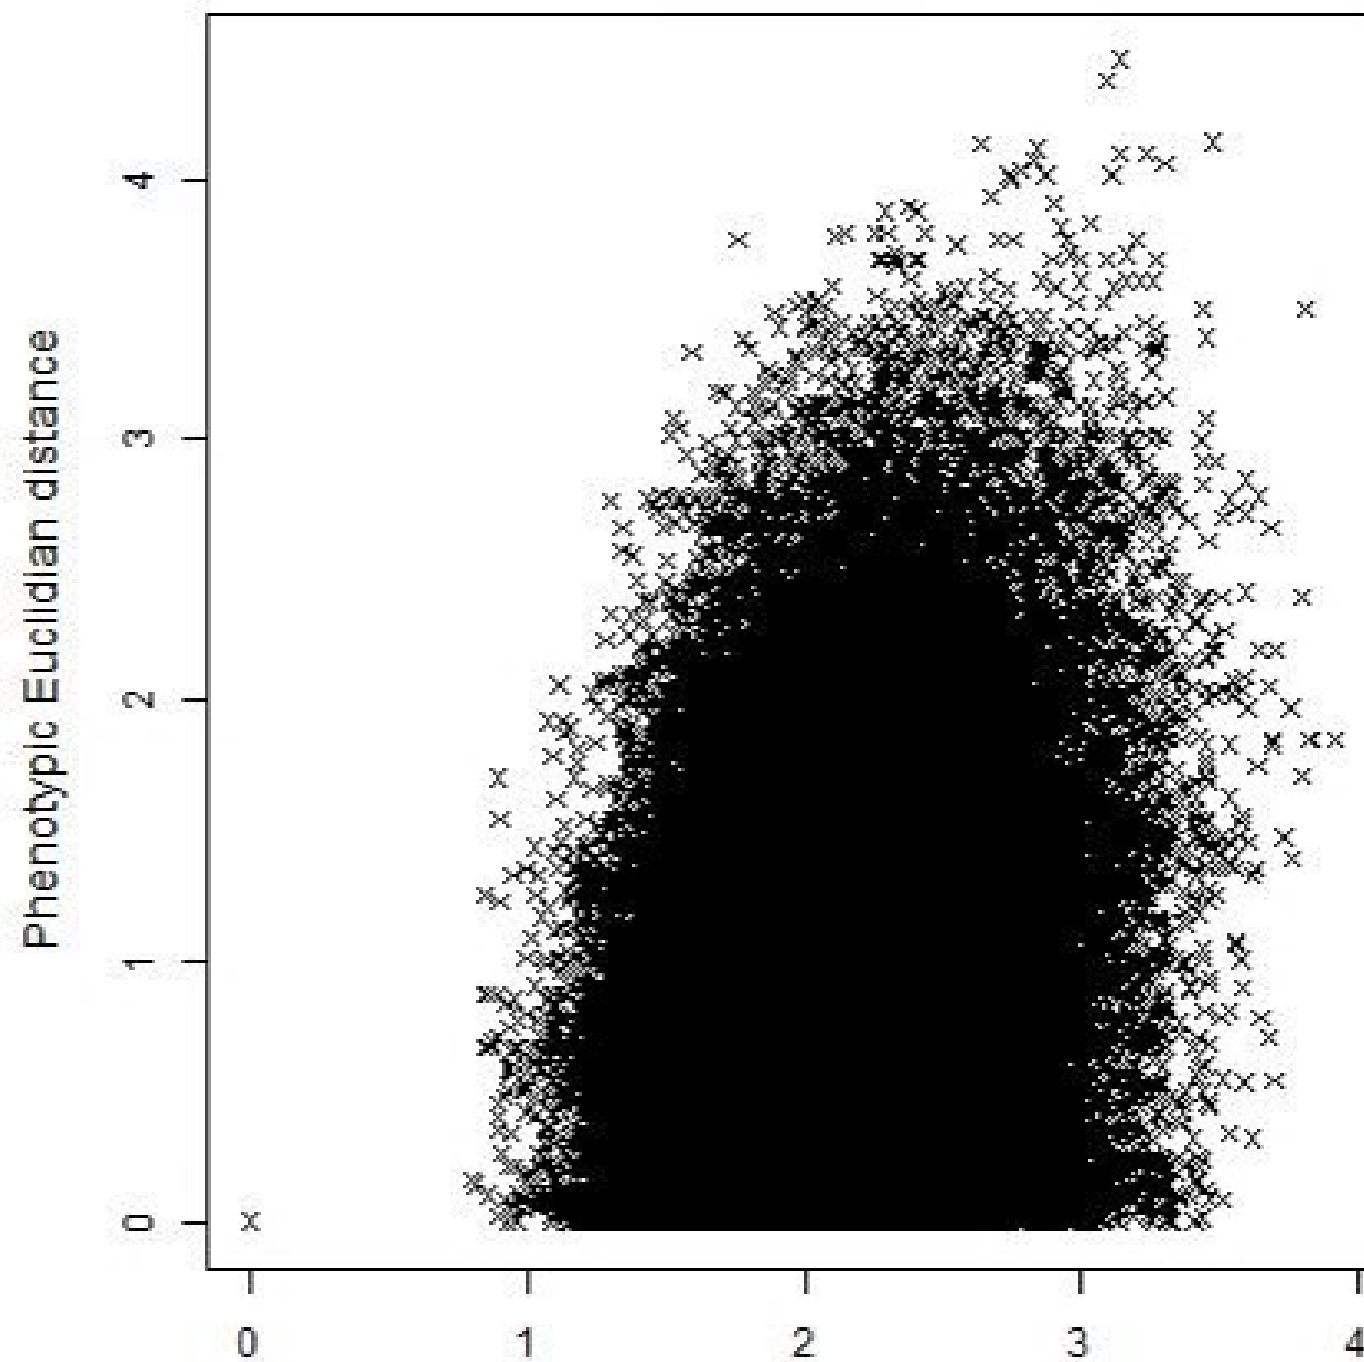

Genetic Euclidian distance (based on the 100 most significantly associated SNPs)

WID\_po16

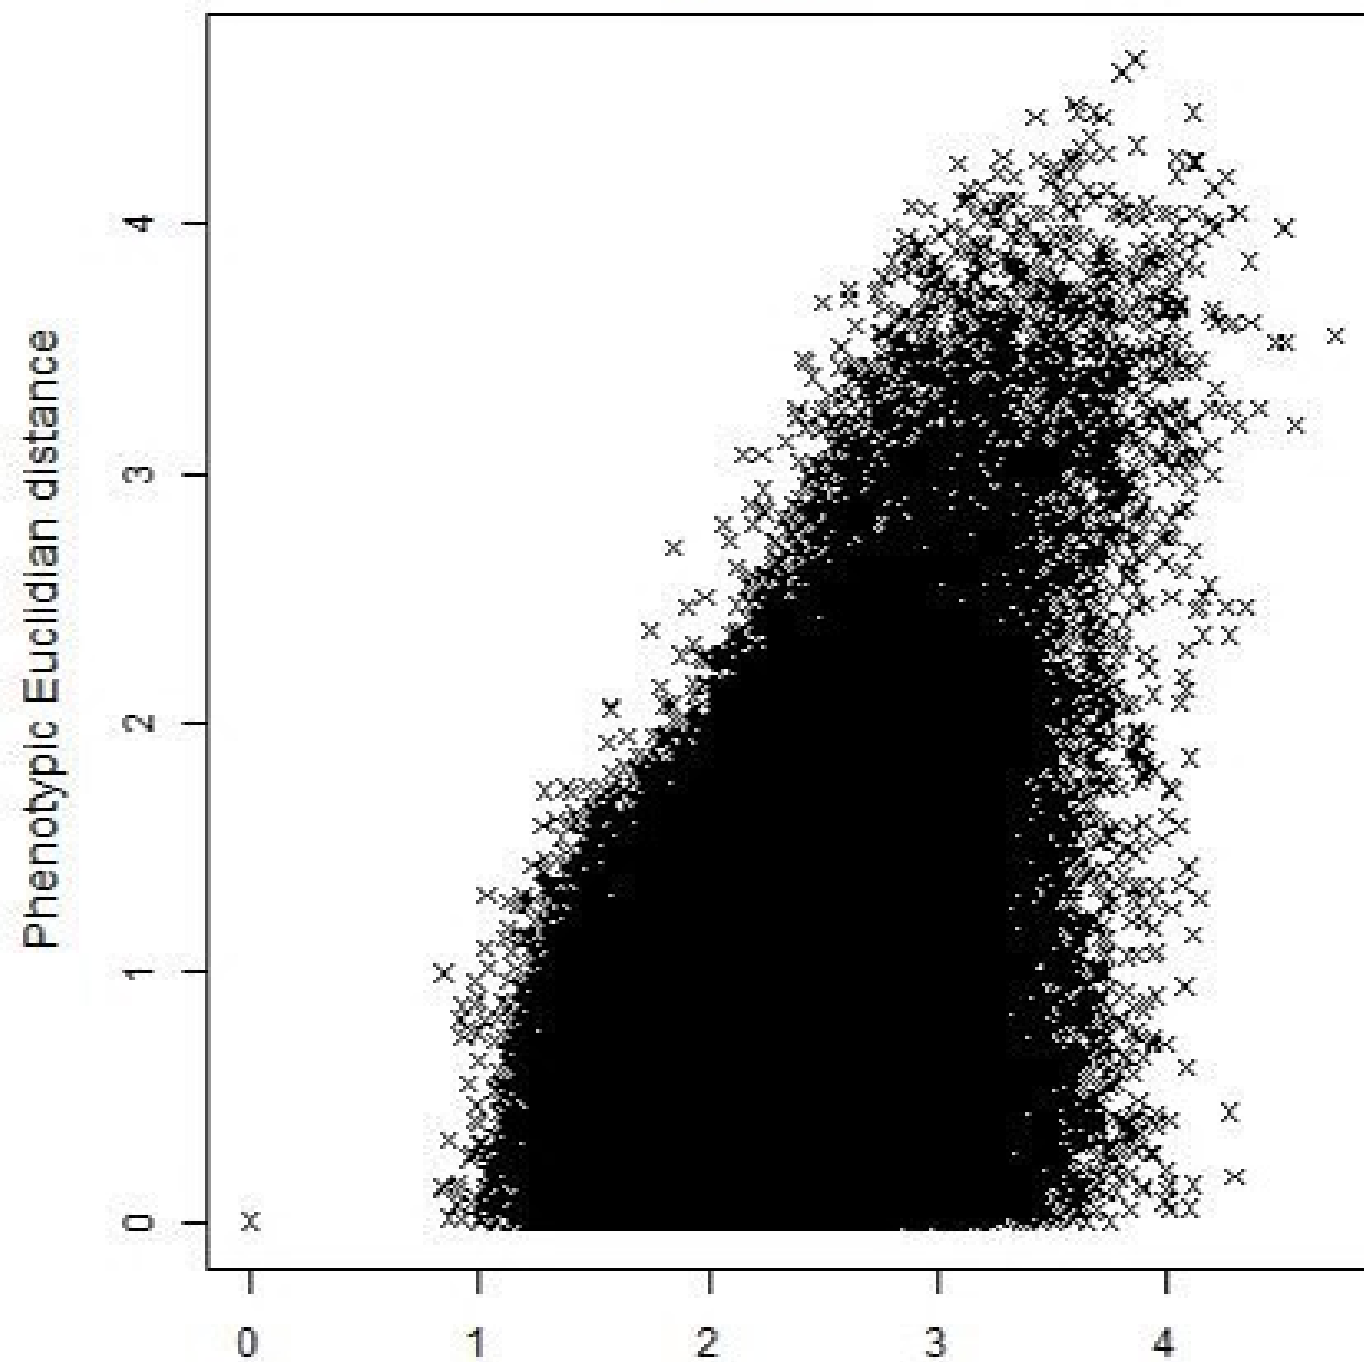

Genetic Euclidian distance (based on the 100 most significantly associated SNPs)

WID\_po17

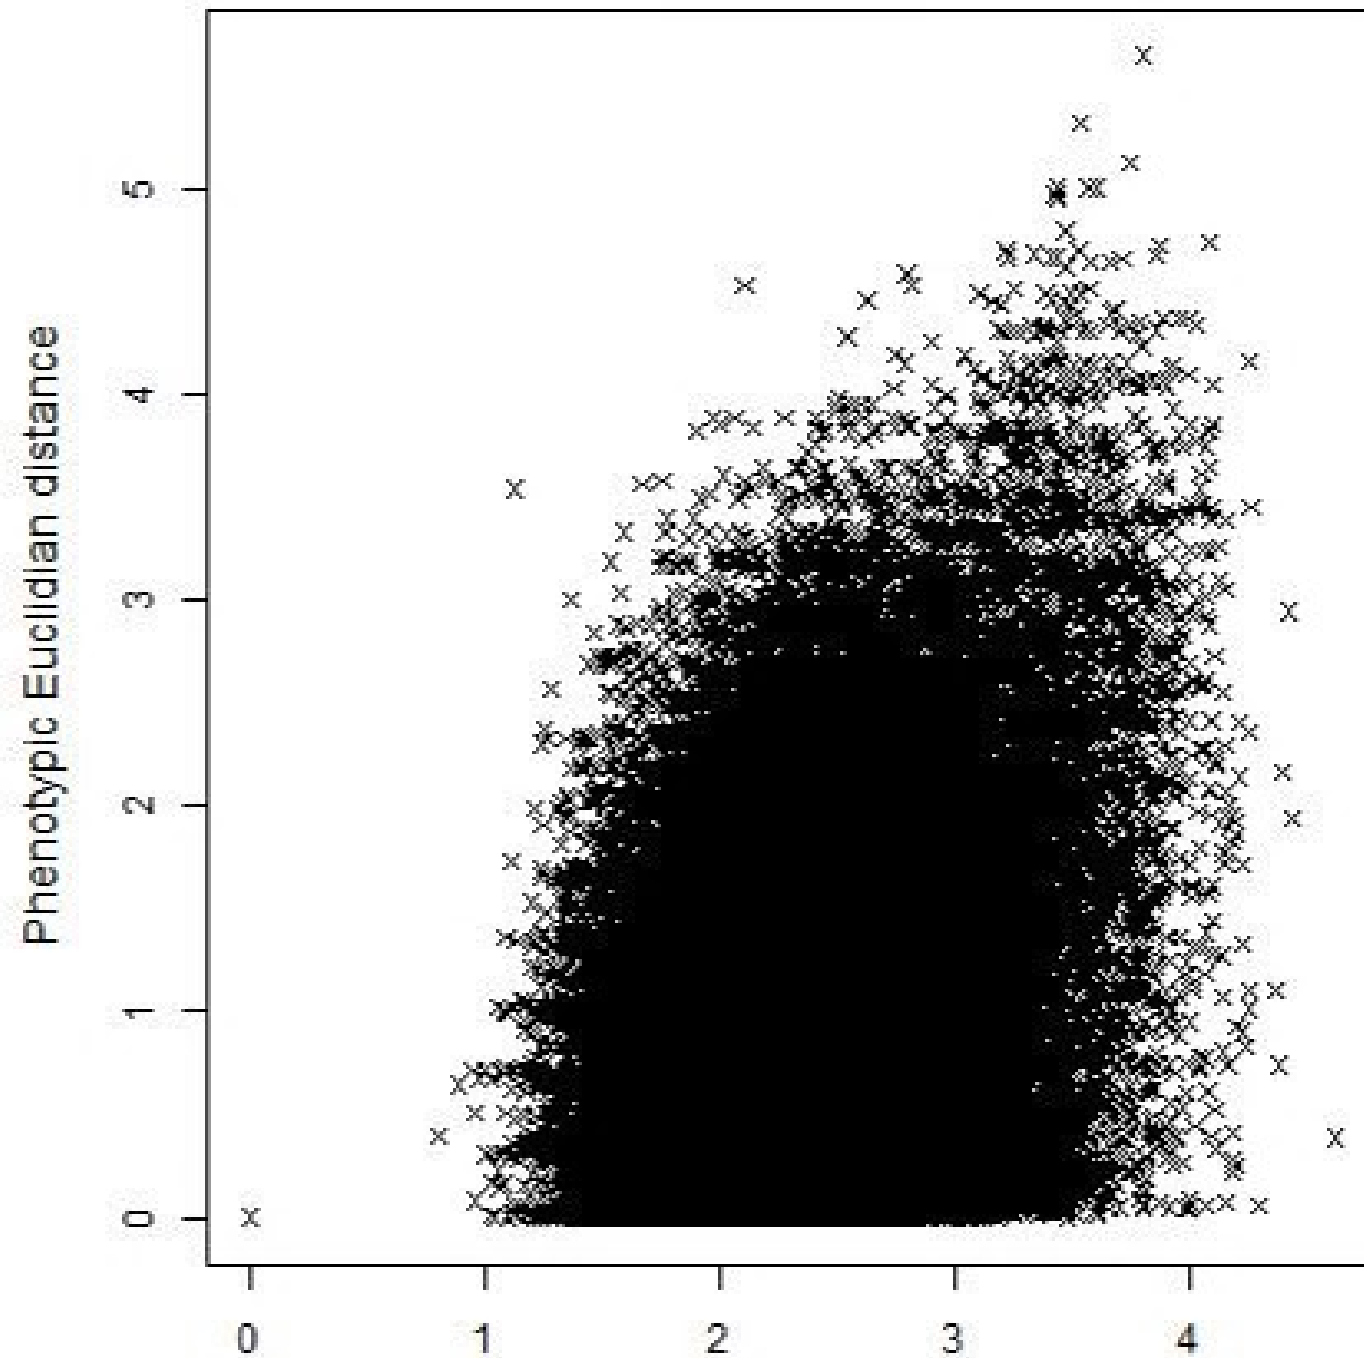

Genetic Euclidian distance (based on the 100 most significantly associated SNPs)

WSC\_04\_me17

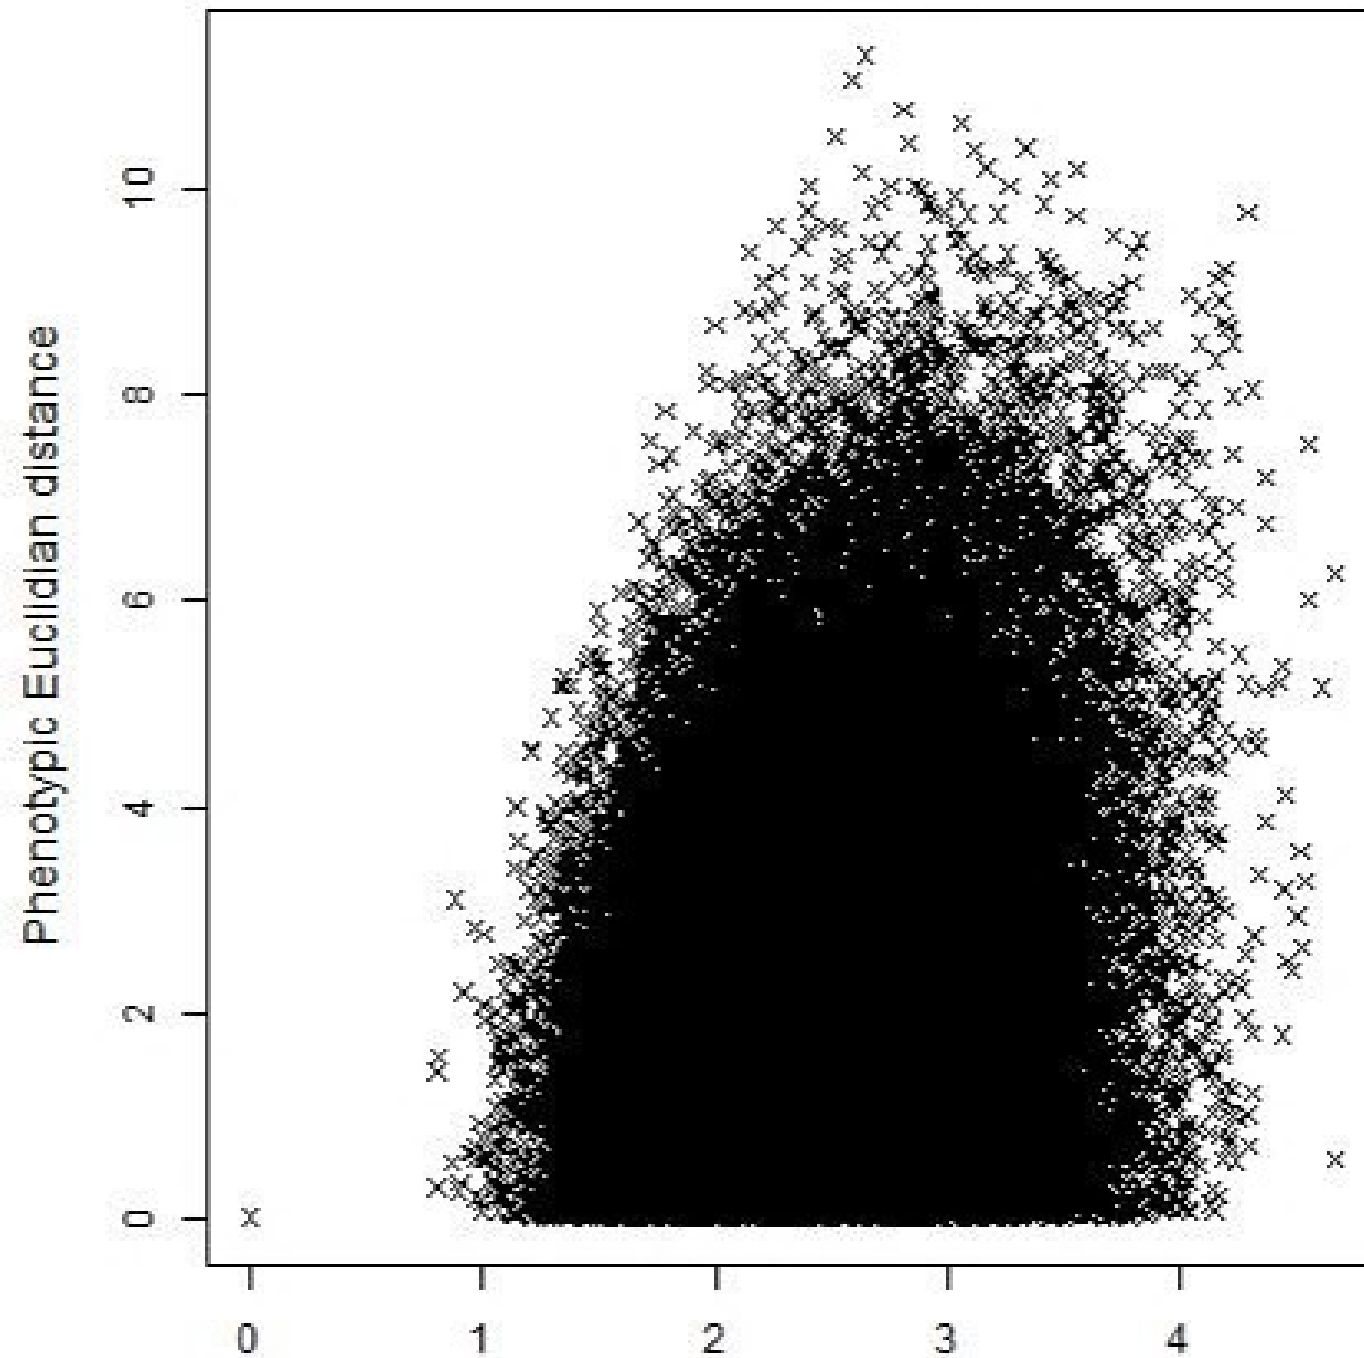

Genetic Euclidian distance (based on the 100 most significantly associated SNPs)

WSC\_10\_me17

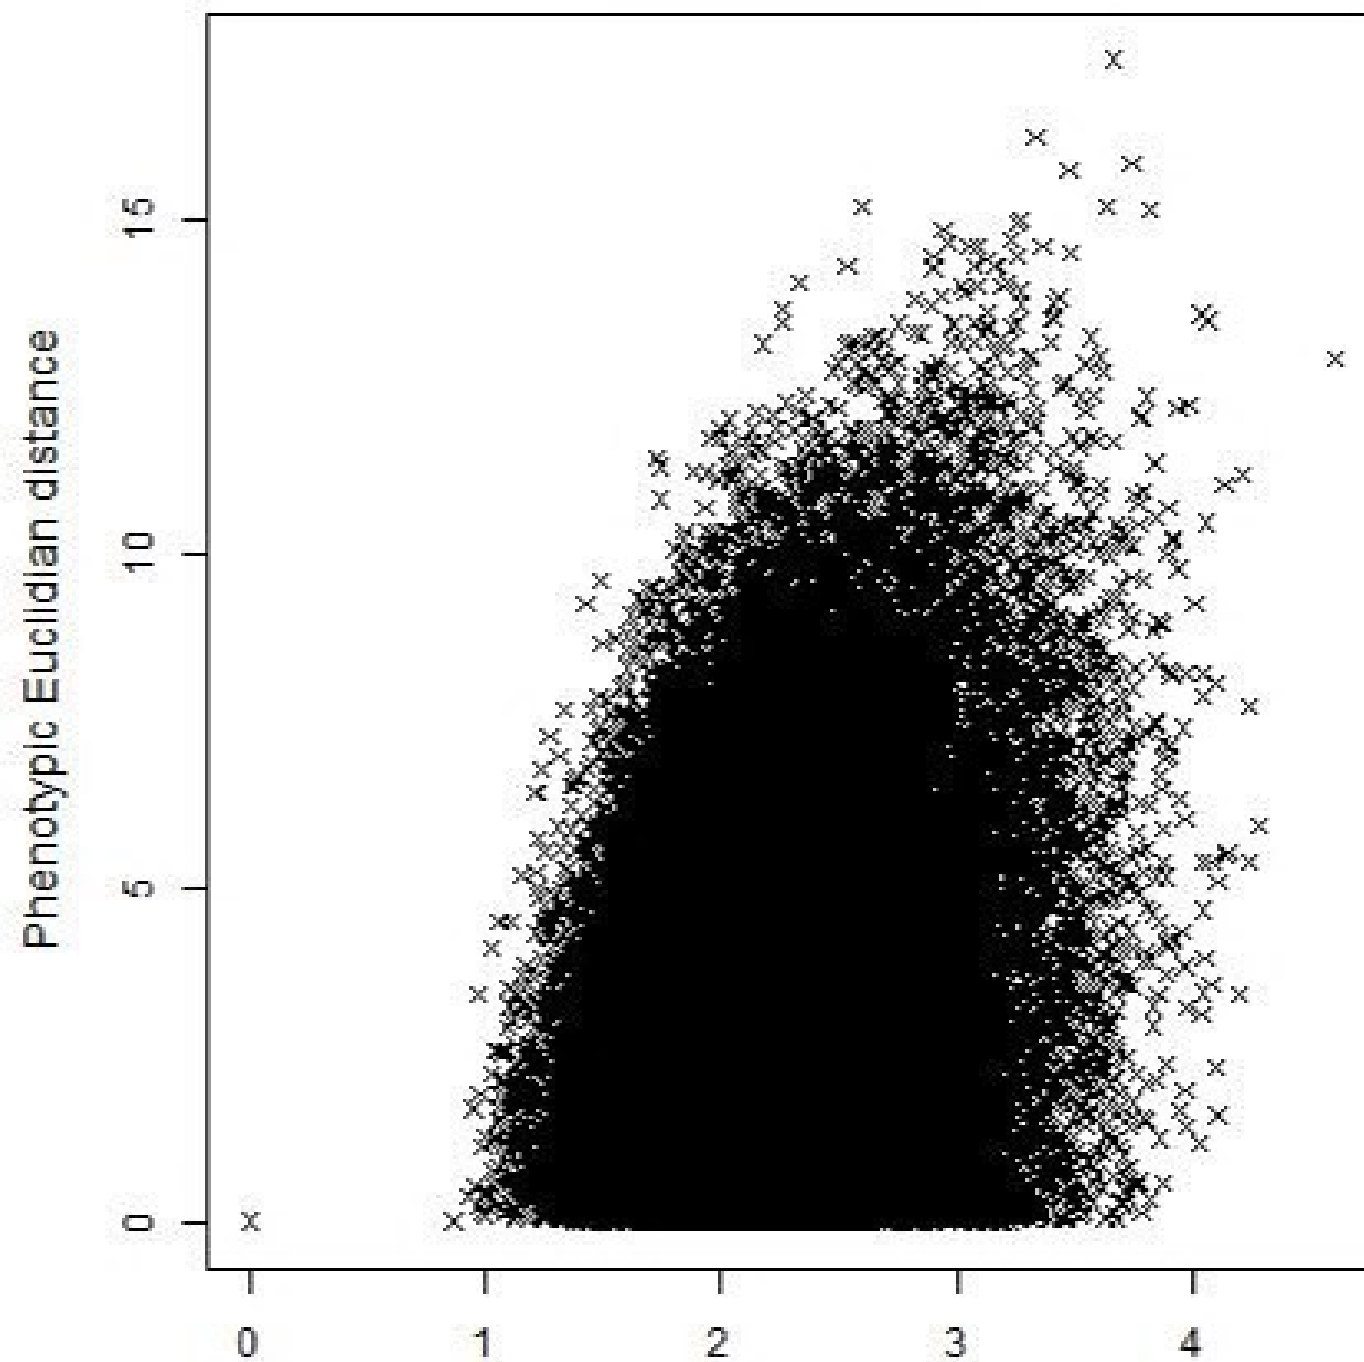

Genetic Euclidian distance (based on the 100 most significantly associated SNPs)



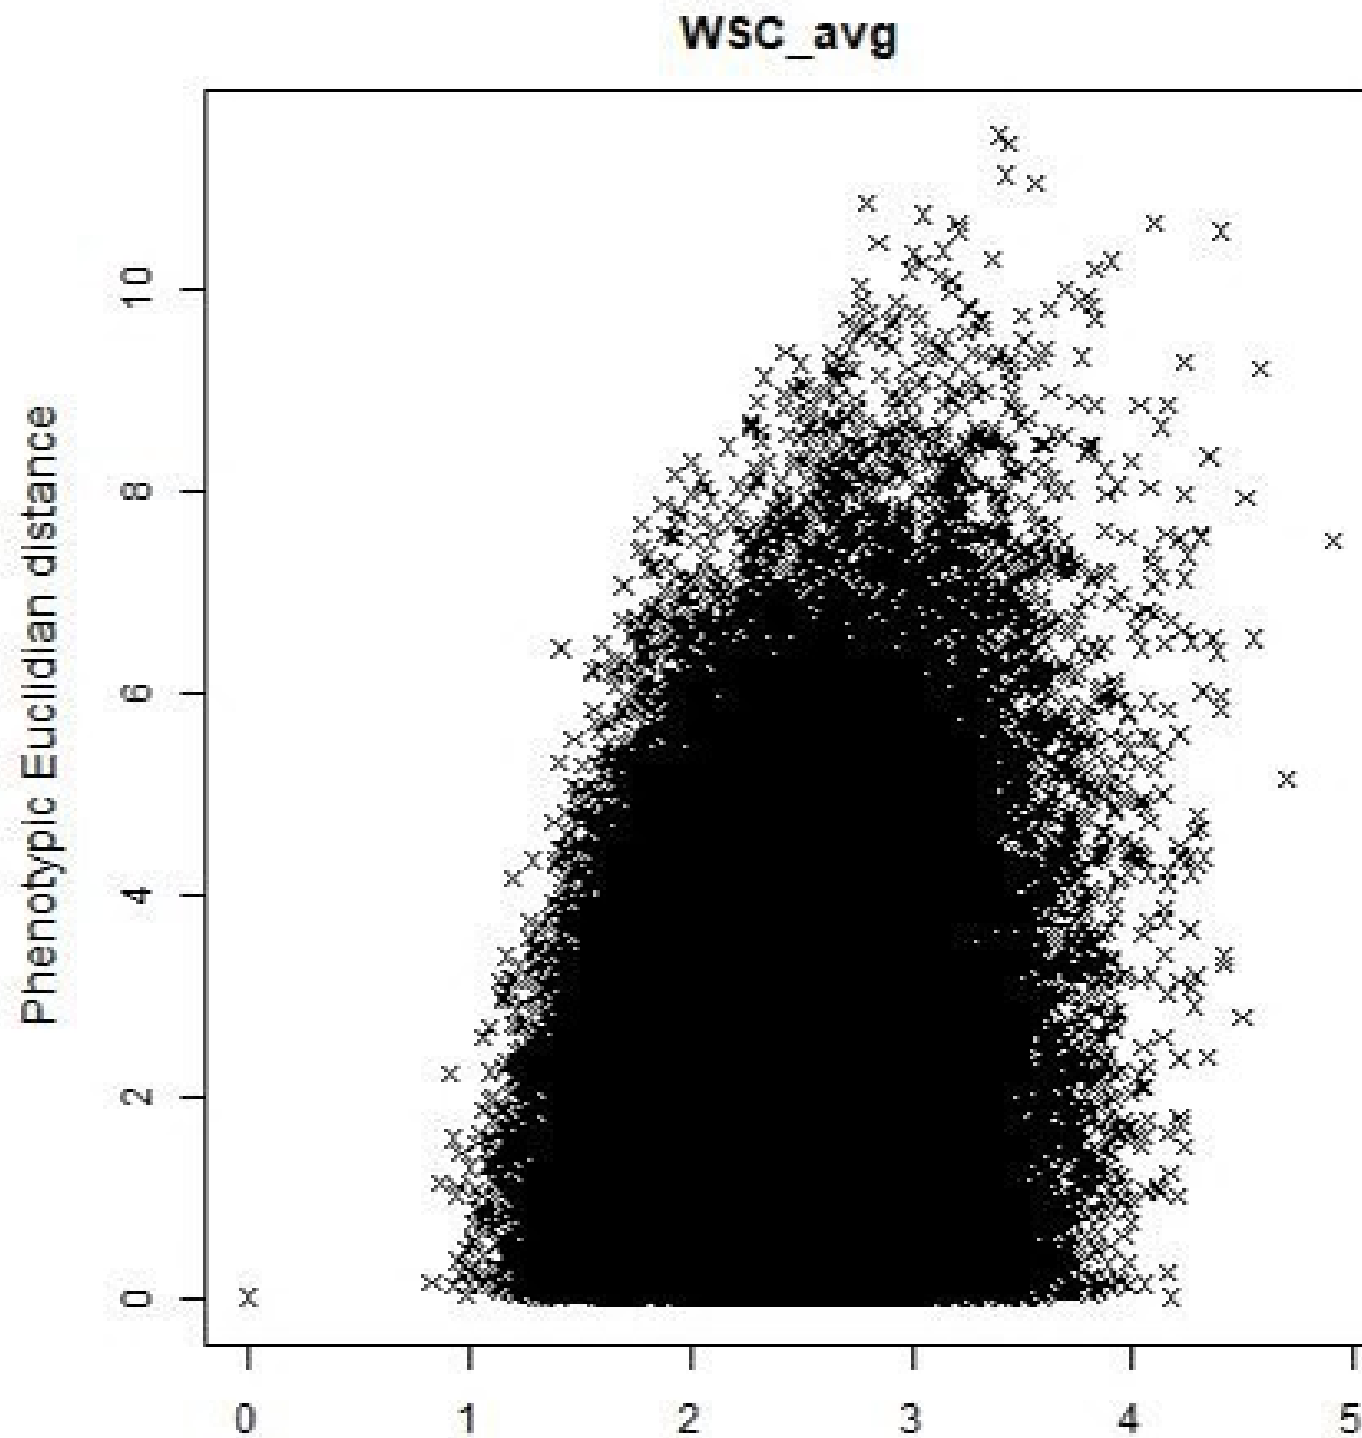

Genetic Euclidian distance (based on the 100 most significantly associated SNPs)

X.13C\_lu16

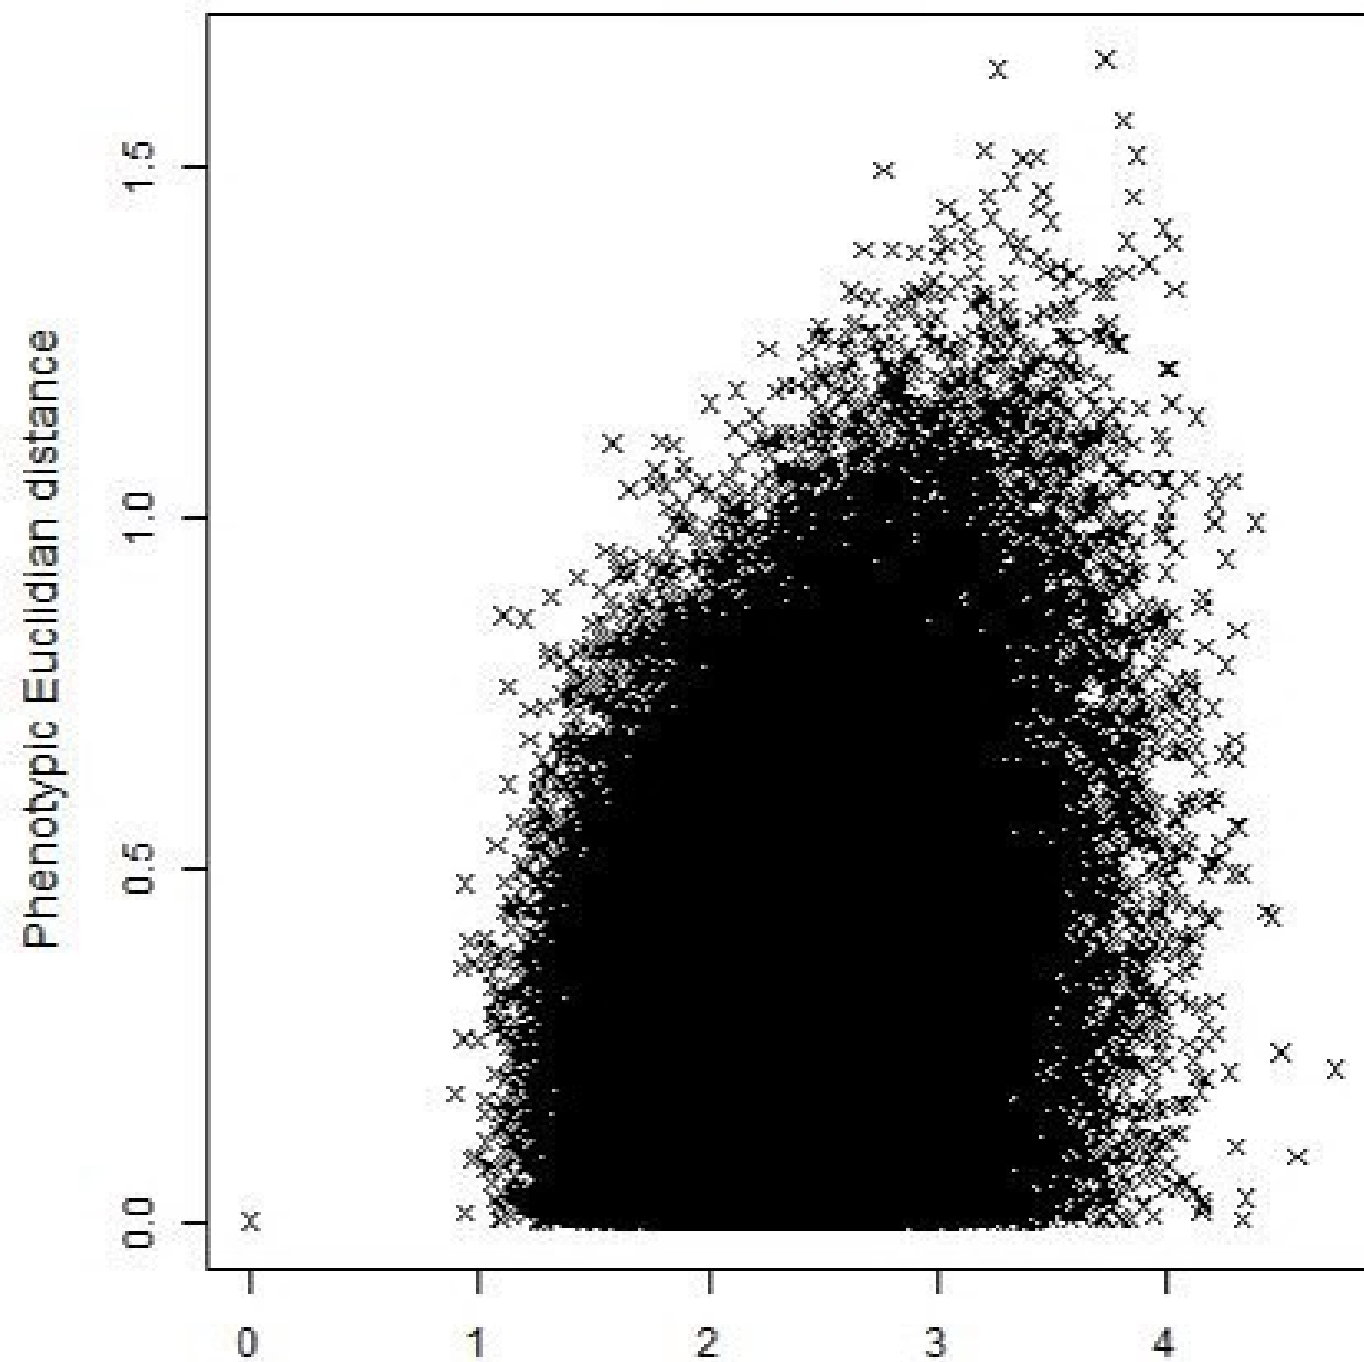

Genetic Euclidian distance (based on the 100 most significantly associated SNPs)
